# Supplementary material for: Host-Selective Toxins of Pyrenophora tritici-repentis Induce Common Responses Associated with Host Susceptibility
Source: PLoS One. 2012 Jul 6;7(7):e40240. doi: 10.1371/journal.pone.0040240 (PMC3391247; doi:10.1371/journal.pone.0040240)
Supplement: Table S2 — Annotations, regulation, and mean intensitites with standard deviations of statistically significant differentially regulated probesets for ToxB microarray experiment. (XLS) [file pone.0040240.s004.xls]

## Sheet: Supplementary_Table_2
Table S2. Statistically significant differentially regulated probesets for ToxB microarray experiment.
											intensities
PID	RICE_HIT	RICE_ANNOTATION	TIGR_TA_ANNOTATION	TA-EST_hit	3hr	9hr	14hr	24hr	48hr	Condition	0hr_mean	3hr_mean	9hr_mean	14hr_mean	24hr_mean	48hr_mean	0hr_std	3hr_std	9hr_std	14hr_std	24hr_std	48hr_std
Ta.10.1.S1_a_at	Os05g31140.1	lichenase-2 precursor, putative, expressed	(1,3;1,4) beta glucanase precursor [Triticum aestivum (Wheat)]	CA643124	n	n	n	down	n	untreated	9800.07	2027.33	12268.6	9549.9	13812.6	7614.19	2637.78	1991.8	3650.21	3454.16	1452.96	4271.11
Ta.10.1.S1_a_at	Os05g31140.1	lichenase-2 precursor, putative, expressed	(1,3;1,4) beta glucanase precursor [Triticum aestivum (Wheat)]	CA643124	n	n	n	down	n	treated	9792.26	3213.08	7745.46	3802.49	1588.34	1618.77	2459.3	1099.57	3123.95	966.332	725.438	991.578
Ta.10.1.S1_x_at	Os05g31140.1	lichenase-2 precursor, putative, expressed	(1,3;1,4) beta glucanase precursor [Triticum aestivum (Wheat)]	TA65493_4565	n	n	n	down	n	untreated	15352.3	3394.57	18554.9	14789.9	20054.5	12043	4317.05	3280.34	5039.01	5466.86	1934.53	6691.49
Ta.10.1.S1_x_at	Os05g31140.1	lichenase-2 precursor, putative, expressed	(1,3;1,4) beta glucanase precursor [Triticum aestivum (Wheat)]	TA65493_4565	n	n	n	down	n	treated	15243.5	5524.7	11813.9	6333.47	3074.14	3107.47	4745.68	1533.78	4721.03	1629.53	1469.59	2022.52
Ta.10.2.S1_x_at	Os05g31140.1	lichenase-2 precursor, putative, expressed	(1,3;1,4) beta glucanase precursor [Triticum aestivum (Wheat)]	CK195626	n	n	n	down	n	untreated	15524.2	3655.14	17473.3	15323.2	19922.4	13326.6	4097.97	3648.22	4169.95	4574.28	1594.29	6389.89
Ta.10.2.S1_x_at	Os05g31140.1	lichenase-2 precursor, putative, expressed	(1,3;1,4) beta glucanase precursor [Triticum aestivum (Wheat)]	CK195626	n	n	n	down	n	treated	15403	5941.47	12271.5	6887.08	3016.77	2851.16	2747.59	1855.18	4312.17	1468.88	1393.58	1719.17
Ta.1000.1.S1_at	Os10g39670.1	ATP binding protein, putative, expressed	NA	TA93735_4565	n	n	up	up	up	untreated	14.1152	21.4411	30.8158	20.5132	12.3565	13.8022	0.683193	8.25787	4.52631	3.18973	0.263164	2.29756
Ta.1000.1.S1_at	Os10g39670.1	ATP binding protein, putative, expressed	NA	TA93735_4565	n	n	up	up	up	treated	12.0582	36.7953	51.0205	62.5397	87.2499	136.069	0.845244	19.1534	7.32932	3.18005	6.6419	12.2327
Ta.10005.1.S1_at	Os02g35950.1	expressed protein	Putative nucleic acid binding protein [Oryza sativa (japonica cultivar-group)]	TA56181_4565	n	n	n	down	down	untreated	3404.6	3199.96	1698.24	2059.63	3252.66	2846	411.162	164.916	156.703	494.831	163.705	133.718
Ta.10005.1.S1_at	Os02g35950.1	expressed protein	Putative nucleic acid binding protein [Oryza sativa (japonica cultivar-group)]	TA56181_4565	n	n	n	down	down	treated	3387.58	3065.88	1714.02	2089.42	667.14	956.933	295.336	779.871	179.981	108.235	147.749	136.944
Ta.10008.1.A1_at	Os03g50510.1	threonine dehydratase biosynthetic, chloroplast precursor, putative, expressed	Putative dehydratase/deaminase [Oryza sativa (japonica cultivar-group)]	TA92029_4565	n	n	n	n	down	untreated	907.921	569.731	469.426	557.469	546.018	561.854	270.76	30.0868	49.8178	92.2988	82.3696	81.0119
Ta.10008.1.A1_at	Os03g50510.1	threonine dehydratase biosynthetic, chloroplast precursor, putative, expressed	Putative dehydratase/deaminase [Oryza sativa (japonica cultivar-group)]	TA92029_4565	n	n	n	n	down	treated	797.988	579.966	514.134	439.194	339.044	229.455	86.7737	161.172	17.7686	27.0557	26.1016	30.3822
Ta.10009.1.S1_at	Os11g09329.1	VHS and GAT domain protein, putative, expressed	Seed protein B32E [Oryza sativa (japonica cultivar-group)]	TA71219_4565	n	n	n	up	up	untreated	1429.25	2103.59	1773.92	1481.79	1390.1	1452.01	83.9362	163.586	17.3772	288.925	77.3801	351.142
Ta.10009.1.S1_at	Os11g09329.1	VHS and GAT domain protein, putative, expressed	Seed protein B32E [Oryza sativa (japonica cultivar-group)]	TA71219_4565	n	n	n	up	up	treated	1313.11	2698.37	1856.19	2438.58	5696.52	5293.43	61.8241	61.7679	383.449	257.713	254.984	442.59
Ta.10009.2.S1_a_at	Os11g09329.1	VHS and GAT domain protein, putative, expressed	Hypothetical protein At1g76970 [Arabidopsis thaliana (Mouse-ear cress)]	CJ683824	n	n	n	up	up	untreated	238.454	372.089	250.845	234.474	208.153	195.109	27.2788	56.2598	4.41681	19.1047	19.5026	31.7664
Ta.10009.2.S1_a_at	Os11g09329.1	VHS and GAT domain protein, putative, expressed	Hypothetical protein At1g76970 [Arabidopsis thaliana (Mouse-ear cress)]	CJ683824	n	n	n	up	up	treated	204.48	457.075	314.325	380.586	1110.13	817.475	19.966	37.661	48.4999	50.5291	147.32	101.517
Ta.10009.2.S1_x_at	Os11g09329.1	VHS and GAT domain protein, putative, expressed	F24J8.3 protein [Arabidopsis thaliana (Mouse-ear cress)]	CA664560	n	n	n	up	up	untreated	226.562	343.646	259.569	229.586	218.762	208.896	16.5068	52.4027	16.7435	13.6879	12.0477	19.0489
Ta.10009.2.S1_x_at	Os11g09329.1	VHS and GAT domain protein, putative, expressed	F24J8.3 protein [Arabidopsis thaliana (Mouse-ear cress)]	CA664560	n	n	n	up	up	treated	204.53	386.364	278.778	312.147	925.006	720.754	21.2924	79.6582	45.6557	22.244	82.1857	116.138
Ta.10015.1.A1_a_at	Os10g07229.1	alcohol dehydrogenase 2, putative, expressed	oxidoreductase/ zinc ion binding [Arabidopsis thaliana]	TA72170_4565	n	n	down	down	down	untreated	912.413	654.029	521.672	532.224	1291.1	1013.68	134.543	59.6084	29.41	14.5417	131.61	70.0651
Ta.10015.1.A1_a_at	Os10g07229.1	alcohol dehydrogenase 2, putative, expressed	oxidoreductase/ zinc ion binding [Arabidopsis thaliana]	TA72170_4565	n	n	down	down	down	treated	840.349	397.712	311.341	259.864	216.287	221.181	133.408	110.424	79.8242	10.9313	24.2774	13.1142
Ta.10015.1.A1_at	Os10g07229.1	alcohol dehydrogenase 2, putative, expressed	oxidoreductase/ zinc ion binding [Arabidopsis thaliana]	TA72170_4565	n	n	n	down	n	untreated	198.358	175.596	106.188	147.244	291.975	255.59	35.4791	51.8252	20.0627	38.1888	57.0907	84.2644
Ta.10015.1.A1_at	Os10g07229.1	alcohol dehydrogenase 2, putative, expressed	oxidoreductase/ zinc ion binding [Arabidopsis thaliana]	TA72170_4565	n	n	n	down	n	treated	175.908	100.859	69.5222	71.6891	69.6003	65.5441	39.0718	28.2241	13.3761	1.25113	3.66787	5.50085
Ta.10015.2.S1_at	Os10g07229.1	alcohol dehydrogenase 2, putative, expressed	Alcohol dehydrogenase, putative [Arabidopsis thaliana (Mouse-ear cress)]	TA72171_4565	n	n	n	down	down	untreated	205.439	172.549	135.404	135.422	314.944	241.885	31.4259	11.6744	8.50953	8.94949	36.8181	15.9631
Ta.10015.2.S1_at	Os10g07229.1	alcohol dehydrogenase 2, putative, expressed	Alcohol dehydrogenase, putative [Arabidopsis thaliana (Mouse-ear cress)]	TA72171_4565	n	n	n	down	down	treated	194.842	108.648	93.8299	77.3997	73.6591	77.9619	19.2906	32.3535	14.3524	12.4696	5.30011	10.2759
Ta.10015.3.S1_at	Os01g48990.1	protein Kinase C630.09c, putative, expressed	D-glycerate 3-kinase, chloroplast precursor [Arabidopsis thaliana (Mouse-ear cress)]	TA72173_4565	n	n	n	down	down	untreated	1978.33	1188.8	1538.51	1940.78	1584.85	1798.05	231.458	166.013	190.689	640.305	187.187	829.61
Ta.10015.3.S1_at	Os01g48990.1	protein Kinase C630.09c, putative, expressed	D-glycerate 3-kinase, chloroplast precursor [Arabidopsis thaliana (Mouse-ear cress)]	TA72173_4565	n	n	n	down	down	treated	2130.08	847.121	878.897	856.969	60.5781	86.4974	431.443	233.096	303.865	279.434	21.3389	38.0494
Ta.10037.1.S1_at	Os05g37884.1	50S ribosomal protein L33, putative, expressed	Putative 50S ribosomal protein L33 [Arabidopsis thaliana (Mouse-ear cress)]	TA87487_4565	n	n	n	up	n	untreated	44.9539	79.1586	72.1342	105.813	70.858	57.5591	12.1228	17.7055	10.6159	3.36935	3.17509	18.6586
Ta.10037.1.S1_at	Os05g37884.1	50S ribosomal protein L33, putative, expressed	Putative 50S ribosomal protein L33 [Arabidopsis thaliana (Mouse-ear cress)]	TA87487_4565	n	n	n	up	n	treated	44.9318	101.389	102.771	155.245	146.329	106.291	6.54559	53.6996	18.0974	9.69223	1.35178	3.37888
Ta.10045.1.S1_a_at	Os11g07910.1	transmembrane 9 superfamily protein member 3 precursor, putative, expressed	Endomembrane protein EMP70 precusor isolog; 68664-64364 [Arabidopsis thaliana (Mouse-ear cress)]	CA611898	n	n	n	up	n	untreated	1712.2	2986.99	1986.17	2230.74	1966.06	1864.64	162.709	332.766	57.6711	203.684	150.069	407.353
Ta.10045.1.S1_a_at	Os11g07910.1	transmembrane 9 superfamily protein member 3 precursor, putative, expressed	Endomembrane protein EMP70 precusor isolog; 68664-64364 [Arabidopsis thaliana (Mouse-ear cress)]	CA611898	n	n	n	up	n	treated	1659.33	3229.1	2463.01	3252.29	4033.49	3368.2	136.038	256.18	206.97	124.974	164.131	156.436
Ta.1006.1.S1_at	Os02g56510.1	phosphate transporter 1, putative, expressed	Putative phosphate transporter [Oryza sativa (japonica cultivar-group)]	BE405277	n	n	up	n	n	untreated	399.796	787.001	39.7055	42.221	573.66	834.859	44.7662	121.498	12.5138	15.6335	122.765	171.851
Ta.1006.1.S1_at	Os02g56510.1	phosphate transporter 1, putative, expressed	Putative phosphate transporter [Oryza sativa (japonica cultivar-group)]	BE405277	n	n	up	n	n	treated	442.463	503.186	55.6752	108.865	563.626	302.832	1.57075	347.853	18.081	14.0033	27.5823	199.729
Ta.10063.1.S1_s_at	Os06g41990.2	metalloendopeptidase, putative, expressed	Pitrilysin [Arabidopsis thaliana (Mouse-ear cress)]	TA78765_4565	n	n	n	down	n	untreated	6107.09	4620.76	6315.93	5764.04	6395.22	6342.65	438.686	535.769	274.632	1193.04	208.756	820.698
Ta.10063.1.S1_s_at	Os06g41990.2	metalloendopeptidase, putative, expressed	Pitrilysin [Arabidopsis thaliana (Mouse-ear cress)]	TA78765_4565	n	n	n	down	n	treated	6160.28	4217.16	5241.05	4016.93	3186.92	4660.67	185.541	362.998	300.255	164.248	112.033	378.927
Ta.10066.1.S1_at	Os01g42990.1	conserved hypothetical protein	Membrane-associated salt-inducible protein-like [Oryza sativa (japonica cultivar-group)]	BE515990	n	n	n	down	n	untreated	93.3877	107.39	103.404	161.752	132.767	126.028	12.4383	18.7109	14.1553	14.0644	4.54515	2.94376
Ta.10066.1.S1_at	Os01g42990.1	conserved hypothetical protein	Membrane-associated salt-inducible protein-like [Oryza sativa (japonica cultivar-group)]	BE515990	n	n	n	down	n	treated	94.2029	111.036	111.1	170.563	59.2035	93.774	8.79581	46.048	5.11773	9.7709	12.0337	13.9818
Ta.10067.1.A1_at	Os12g38440.2	transcription factor X1-like protein, putative, expressed	NA	TA89748_4565	n	n	down	down	n	untreated	273.049	114.082	315.703	410.116	231.125	250.514	33.6445	46.3823	36.074	60.3117	35.8688	54.7424
Ta.10067.1.A1_at	Os12g38440.2	transcription factor X1-like protein, putative, expressed	NA	TA89748_4565	n	n	down	down	n	treated	258.139	107.666	151.626	143.423	69.4264	198.485	59.3411	51.3148	26.1287	9.05758	4.17997	42.9905
Ta.10067.2.S1_at	Os12g38440.2	transcription factor X1-like protein, putative, expressed	NA	TA89748_4565	n	n	down	down	n	untreated	388.921	149.263	386.913	443.438	268.933	296.887	45.4814	42.8867	29.9215	73.1373	34.6773	48.9116
Ta.10067.2.S1_at	Os12g38440.2	transcription factor X1-like protein, putative, expressed	NA	TA89748_4565	n	n	down	down	n	treated	374.157	120.072	188.991	154.994	89.8755	177.509	54.8399	35.1554	19.0756	15.4019	19.1072	30.9035
Ta.10073.1.S1_a_at	Os01g62150.1	coatomer subunit zeta-2, putative, expressed	Putative coatomer zeta1 subunit [Oryza sativa (japonica cultivar-group)]	CA627499	n	n	n	n	up	untreated	379.079	324.157	465.788	716.795	475.106	454.116	64.5428	5.61196	60.0477	165.903	36.0252	55.1384
Ta.10073.1.S1_a_at	Os01g62150.1	coatomer subunit zeta-2, putative, expressed	Putative coatomer zeta1 subunit [Oryza sativa (japonica cultivar-group)]	CA627499	n	n	n	n	up	treated	348.295	361.832	503.508	624.444	789.256	1072.66	8.13509	205.535	67.972	73.709	2.91501	58.5832
Ta.10081.1.S1_at	Os04g21320.1	salicylic acid-induced fragment 1 protein, putative, expressed	OSJNBa0094P09.18 protein [Oryza sativa (japonica cultivar-group)]	TA65458_4565	n	n	n	down	down	untreated	1307.36	1505.42	1780.61	1707.45	1810.8	1847.22	50.9339	163.274	52.2741	43.0303	28.9373	168.611
Ta.10081.1.S1_at	Os04g21320.1	salicylic acid-induced fragment 1 protein, putative, expressed	OSJNBa0094P09.18 protein [Oryza sativa (japonica cultivar-group)]	TA65458_4565	n	n	n	down	down	treated	1250.77	988.062	1033.12	947.736	271.362	531.949	67.8978	53.6682	56.9501	30.726	58.2494	70.6539
Ta.10081.2.S1_at	Os07g04990.1	aldo-keto reductase/ oxidoreductase, putative, expressed	Aldo/keto reductase family-like protein [Oryza sativa (japonica cultivar-group)]	TA65463_4565	n	n	down	down	down	untreated	2139.7	1557.69	3606.06	3366.63	1284.95	1375.24	543.534	145.481	319.51	348.765	134.292	703.422
Ta.10081.2.S1_at	Os07g04990.1	aldo-keto reductase/ oxidoreductase, putative, expressed	Aldo/keto reductase family-like protein [Oryza sativa (japonica cultivar-group)]	TA65463_4565	n	n	down	down	down	treated	2218.02	1267.15	1858.59	1503.49	106.482	34.921	375.365	329.076	157.586	149.501	45.8198	7.14411
Ta.10084.1.S1_at	NA	NA	high-affinity phosphate transporter PT1	CA696548	n	up	up	up	n	untreated	2244.14	6012.35	7635.8	8477.02	5561.89	4970.64	365.542	1118.49	1781.4	1212.93	863.954	3736.83
Ta.10084.1.S1_at	NA	NA	high-affinity phosphate transporter PT1	CA696548	n	up	up	up	n	treated	2093.84	12886.5	16056.2	22969.7	25382.4	23613.2	470.731	9724.91	1252.4	636.665	119.116	1839.1
Ta.10085.1.S1_x_at	Os11g05260.1	phosphoglycerate mutase, putative, expressed	Phosphoglycerate mutase family, putative [Oryza sativa (japonica cultivar-group)]	TA77005_4565	n	n	n	down	down	untreated	994.847	499.716	783.953	886.727	727.749	860.297	28.7645	51.1239	60.5618	128.195	44.5845	291.802
Ta.10085.1.S1_x_at	Os11g05260.1	phosphoglycerate mutase, putative, expressed	Phosphoglycerate mutase family, putative [Oryza sativa (japonica cultivar-group)]	TA77005_4565	n	n	n	down	down	treated	952.049	406.682	490.36	450.376	68.5001	160.907	50.1237	40.9753	77.2744	74.3142	29.1459	34.0598
Ta.10085.2.S1_at	Os11g05260.1	phosphoglycerate mutase, putative, expressed	Phosphoglycerate mutase family, putative [Oryza sativa (japonica cultivar-group)]	CA622128	n	n	n	down	down	untreated	266.287	142.635	200.297	205.64	193.599	227.308	3.24882	14.858	14.8577	52.625	26.545	74.9616
Ta.10085.2.S1_at	Os11g05260.1	phosphoglycerate mutase, putative, expressed	Phosphoglycerate mutase family, putative [Oryza sativa (japonica cultivar-group)]	CA622128	n	n	n	down	down	treated	271.27	108.03	141.273	132.61	37.4479	86.9727	22.976	19.5553	27.7167	20.5782	4.34471	3.36621
Ta.10087.1.A1_at	Os04g31350.1	expressed protein	OSJNBa0072D21.11 protein [Oryza sativa (japonica cultivar-group)]	TA84463_4565	n	n	n	up	n	untreated	14.6925	14.6887	13.65	11.5462	14.6058	15.8945	1.41777	0.59158	0.568507	0.490062	1.16054	1.63088
Ta.10087.1.A1_at	Os04g31350.1	expressed protein	OSJNBa0072D21.11 protein [Oryza sativa (japonica cultivar-group)]	TA84463_4565	n	n	n	up	n	treated	14.5934	14.6171	13.7336	13.4241	50.0226	28.4006	1.16025	1.4714	0.64094	1.25139	6.83198	8.46308
Ta.10089.1.S1_x_at	Os04g01250.1	glutamyl-tRNA, putative, expressed	OSJNBa0068L06.10 protein [Oryza sativa (japonica cultivar-group)]	TA71561_4565	n	n	n	up	up	untreated	650.745	520.411	641.931	538.01	656.117	427.094	90.7013	164.203	111.495	50.359	141.758	99.2365
Ta.10089.1.S1_x_at	Os04g01250.1	glutamyl-tRNA, putative, expressed	OSJNBa0068L06.10 protein [Oryza sativa (japonica cultivar-group)]	TA71561_4565	n	n	n	up	up	treated	626.66	703.323	819.426	915.921	1722.01	1320.06	72.0401	205.855	172.465	57.5581	189.405	147.712
Ta.10089.2.S1_a_at	Os04g01250.1	glutamyl-tRNA, putative, expressed	OSJNBa0068L06.10 protein [Oryza sativa (japonica cultivar-group)]	CA655290	n	n	n	up	up	untreated	602.808	506.762	597.571	553.868	653.064	428.811	105.571	123.986	137.99	88.7442	108.665	117.821
Ta.10089.2.S1_a_at	Os04g01250.1	glutamyl-tRNA, putative, expressed	OSJNBa0068L06.10 protein [Oryza sativa (japonica cultivar-group)]	CA655290	n	n	n	up	up	treated	521.14	698.422	932.829	976.392	1986.49	1517.54	64.1719	245.313	85.5084	69.7131	263.09	107.132
Ta.10089.3.S1_a_at	Os04g01250.1	glutamyl-tRNA, putative, expressed	OSJNBa0068L06.10 protein [Oryza sativa (japonica cultivar-group)]	TA71562_4565	n	n	n	up	n	untreated	298.671	244.823	271.864	242.001	321.429	228.73	71.427	71.9836	73.1087	23.3139	47.775	98.6127
Ta.10089.3.S1_a_at	Os04g01250.1	glutamyl-tRNA, putative, expressed	OSJNBa0068L06.10 protein [Oryza sativa (japonica cultivar-group)]	TA71562_4565	n	n	n	up	n	treated	240.655	349.769	390.997	462.868	964.448	627.743	44.4899	124.844	82.1241	23.2671	155.728	32.5919
Ta.10089.3.S1_x_at	Os04g01250.1	glutamyl-tRNA, putative, expressed	OSJNBa0068L06.10 protein [Oryza sativa (japonica cultivar-group)]	CA663398	n	n	n	up	up	untreated	166.689	160.356	147.62	135.533	170.147	145.583	27.8431	15.8068	47.1522	17.058	12.6839	13.6151
Ta.10089.3.S1_x_at	Os04g01250.1	glutamyl-tRNA, putative, expressed	OSJNBa0068L06.10 protein [Oryza sativa (japonica cultivar-group)]	CA663398	n	n	n	up	up	treated	150.64	192.953	195.666	227.07	430.417	294.715	15.3763	39.4613	18.8344	4.58215	48.8117	25.0452
Ta.10090.2.S1_a_at	Os07g39390.1	vegetative cell wall protein gp1 precursor, putative, expressed	NA	TA89300_4565	n	n	n	down	n	untreated	185.189	223.574	180.51	257.814	209.006	217.515	55.1074	19.7824	34.8127	79.2201	17.7221	34.0842
Ta.10090.2.S1_a_at	Os07g39390.1	vegetative cell wall protein gp1 precursor, putative, expressed	NA	TA89300_4565	n	n	n	down	n	treated	176.397	174.101	190.706	157.041	98.6708	128.734	7.32831	37.6745	67.2846	24.781	16.8087	12.9923
Ta.10097.1.S1_x_at	Os06g35160.1	CBL-interacting serine/threonine-protein kinase 11, putative, expressed	Putative wpk4 protein kinase [Oryza sativa (japonica cultivar-group)]	TA73167_4565	n	n	n	down	n	untreated	634.965	730.269	532.45	1089.29	691.367	598.564	128.61	61.8664	73.7301	153.774	14.6679	35.1111
Ta.10097.1.S1_x_at	Os06g35160.1	CBL-interacting serine/threonine-protein kinase 11, putative, expressed	Putative wpk4 protein kinase [Oryza sativa (japonica cultivar-group)]	TA73167_4565	n	n	n	down	n	treated	572.089	631.234	470.132	547.612	332.948	307.505	56.5389	98.8478	82.8552	77.0694	60.5808	48.7171
Ta.10098.1.S1_at	Os02g55560.1	DNA-binding protein phosphatase 2C, putative, expressed	putative DNA-binding protein phosphatase 2C [Oryza sativa (japonica cultivar-group)]	TA72026_4565	n	n	n	up	up	untreated	27.2297	48.0825	53.2802	33.0943	18.5493	15.6399	13.988	7.34834	14.2204	4.36793	2.01803	1.36103
Ta.10098.1.S1_at	Os02g55560.1	DNA-binding protein phosphatase 2C, putative, expressed	putative DNA-binding protein phosphatase 2C [Oryza sativa (japonica cultivar-group)]	TA72026_4565	n	n	n	up	up	treated	24.3047	43.9278	44.7274	35.9789	203.705	97.007	5.17411	6.59638	8.70019	4.74867	31.0364	25.8254
Ta.10098.1.S1_x_at	Os02g55560.1	DNA-binding protein phosphatase 2C, putative, expressed	putative DNA-binding protein phosphatase 2C [Oryza sativa (japonica cultivar-group)]	TA72026_4565	n	n	n	up	up	untreated	199.453	323.366	406.437	268.9	138.027	116.864	106.494	65.8779	105.687	46.1367	19.043	19.058
Ta.10098.1.S1_x_at	Os02g55560.1	DNA-binding protein phosphatase 2C, putative, expressed	putative DNA-binding protein phosphatase 2C [Oryza sativa (japonica cultivar-group)]	TA72026_4565	n	n	n	up	up	treated	185.19	317.299	346.936	251.406	964.894	552.368	78.5452	64.8762	27.207	12.5942	137.916	31.6251
Ta.10098.2.S1_a_at	Os02g55560.1	DNA-binding protein phosphatase 2C, putative, expressed	putative DNA-binding protein phosphatase 2C [Oryza sativa (japonica cultivar-group)]	TA72027_4565	n	n	n	up	up	untreated	304.793	241.952	309.155	223.392	87.1999	66.8532	329.788	29.4126	73.6791	25.133	19.1039	11.3025
Ta.10098.2.S1_a_at	Os02g55560.1	DNA-binding protein phosphatase 2C, putative, expressed	putative DNA-binding protein phosphatase 2C [Oryza sativa (japonica cultivar-group)]	TA72027_4565	n	n	n	up	up	treated	225.91	219.239	282.636	190.337	732.836	322.648	149.623	54.0853	115.046	35.7423	143.661	19.1746
Ta.10098.3.S1_a_at	Os02g55560.1	DNA-binding protein phosphatase 2C, putative, expressed	putative DNA-binding protein phosphatase 2C [Oryza sativa (japonica cultivar-group)]	TA72028_4565	n	n	n	up	up	untreated	188.999	162.098	205.168	170.89	78.5423	77.5764	163.652	15.1202	43.5104	26.1022	18.0308	11.7313
Ta.10098.3.S1_a_at	Os02g55560.1	DNA-binding protein phosphatase 2C, putative, expressed	putative DNA-binding protein phosphatase 2C [Oryza sativa (japonica cultivar-group)]	TA72028_4565	n	n	n	up	up	treated	138.999	139.604	165.899	129.088	408.154	206.574	73.7502	22.9674	48.2462	4.95743	70.1589	9.07404
Ta.10098.3.S1_x_at	Os02g55560.1	DNA-binding protein phosphatase 2C, putative, expressed	putative DNA-binding protein phosphatase 2C [Oryza sativa (japonica cultivar-group)]	TA72028_4565	n	n	n	up	up	untreated	221.472	243.975	289.97	226.523	114.822	95.0438	166.619	28.2104	72.8579	38.0446	35.4153	16.002
Ta.10098.3.S1_x_at	Os02g55560.1	DNA-binding protein phosphatase 2C, putative, expressed	putative DNA-binding protein phosphatase 2C [Oryza sativa (japonica cultivar-group)]	TA72028_4565	n	n	n	up	up	treated	180.698	196.985	241.437	168.27	467.377	292.924	71.5585	21.5887	50.5673	17.1786	76.5619	11.6678
Ta.10100.2.S1_a_at	Os10g26600.1	soluble inorganic pyrophosphatase, putative, expressed	Inorganic pyrophosphatase, putative [Oryza sativa (japonica cultivar-group)]	TA82629_4565	n	up	up	up	up	untreated	11.4965	14.6696	14.6219	16.2183	14.1506	12.8946	1.13471	1.51663	2.36741	1.56478	0.387699	0.864029
Ta.10100.2.S1_a_at	Os10g26600.1	soluble inorganic pyrophosphatase, putative, expressed	Inorganic pyrophosphatase, putative [Oryza sativa (japonica cultivar-group)]	TA82629_4565	n	up	up	up	up	treated	11.0086	43.1343	43.3927	74.9869	139.163	30.6324	1.19128	35.303	2.04109	23.2831	48.3855	4.8498
Ta.10100.2.S1_s_at	Os10g26600.1	soluble inorganic pyrophosphatase, putative, expressed	Inorganic pyrophosphatase, putative [Oryza sativa (japonica cultivar-group)]	TA82631_4565	n	n	n	up	n	untreated	11.0423	12.742	11.185	10.8581	11.3975	11.8852	0.721431	1.13953	0.609777	0.493076	1.34838	0.688094
Ta.10100.2.S1_s_at	Os10g26600.1	soluble inorganic pyrophosphatase, putative, expressed	Inorganic pyrophosphatase, putative [Oryza sativa (japonica cultivar-group)]	TA82631_4565	n	n	n	up	n	treated	11.9088	18.7633	13.6999	20.7305	50.3182	19.1543	1.57298	8.20594	2.08751	4.62466	16.0348	3.77489
Ta.10100.2.S1_x_at	Os10g26600.1	soluble inorganic pyrophosphatase, putative, expressed	Inorganic pyrophosphatase, putative [Oryza sativa (japonica cultivar-group)]	TA82629_4565	n	n	n	up	n	untreated	15.1643	16.3333	14.1552	14.1215	14.1978	14.6347	0.489684	1.69829	1.08387	1.05055	1.11599	0.733214
Ta.10100.2.S1_x_at	Os10g26600.1	soluble inorganic pyrophosphatase, putative, expressed	Inorganic pyrophosphatase, putative [Oryza sativa (japonica cultivar-group)]	TA82629_4565	n	n	n	up	n	treated	15.7975	22.3303	22.6664	23.565	44.2292	20.6383	1.04846	6.72293	3.71715	2.532	17.6983	2.24501
Ta.10101.1.S1_s_at	Os03g53280.1	beige/BEACH domain containing protein, expressed	NA	TA83627_4565	n	n	n	up	n	untreated	576.847	661.343	563.699	503.884	567.334	521.955	67.5157	38.6096	41.3419	68.8431	27.0558	144.868
Ta.10101.1.S1_s_at	Os03g53280.1	beige/BEACH domain containing protein, expressed	NA	TA83627_4565	n	n	n	up	n	treated	543.184	609.561	455.02	516.893	1325.26	1080.77	78.5115	73.8178	77.8786	27.7176	125.022	107.269
Ta.10107.1.S1_at	Os01g66940.1	fructokinase-1, putative, expressed	Fructokinase-1 [Oryza sativa (Rice)]	TA69065_4565	n	up	up	up	n	untreated	523.773	842.306	475.176	380.1	444.017	496.162	212.824	285.349	12.6985	38.7744	20.2194	207.636
Ta.10107.1.S1_at	Os01g66940.1	fructokinase-1, putative, expressed	Fructokinase-1 [Oryza sativa (Rice)]	TA69065_4565	n	up	up	up	n	treated	422.235	1453.81	1128.43	1444.31	2584.8	1575.16	77.0134	93.6212	211.985	108.562	209.899	185.249
Ta.10107.2.S1_a_at	Os01g66940.1	fructokinase-1, putative, expressed	Fructokinase-1 [Oryza sativa (Rice)]	TA69065_4565	n	up	up	up	n	untreated	594.013	891.93	455.018	433.325	466.247	476.355	297.344	273.374	27.662	71.7458	32.8658	156.745
Ta.10107.2.S1_a_at	Os01g66940.1	fructokinase-1, putative, expressed	Fructokinase-1 [Oryza sativa (Rice)]	TA69065_4565	n	up	up	up	n	treated	482.928	1771.48	1462.77	1418.73	2371.57	1377.43	124.912	338.722	121.481	158.942	167.427	87.4322
Ta.10107.2.S1_x_at	Os01g66940.1	fructokinase-1, putative, expressed	Fructokinase-1 [Oryza sativa (Rice)]	CA638683	n	up	up	up	n	untreated	726.598	1133.21	582.435	554.901	621.862	615.726	312.996	339.472	44.1147	108.19	65.3058	212.787
Ta.10107.2.S1_x_at	Os01g66940.1	fructokinase-1, putative, expressed	Fructokinase-1 [Oryza sativa (Rice)]	CA638683	n	up	up	up	n	treated	580.493	2207.18	1712.67	1769.3	3021.43	1758.93	132.147	398.205	44.0994	116.831	156.524	147.537
Ta.10108.3.S1_a_at	Os08g31470.1	expressed protein	Hypothetical protein P0453D01.16-1 [Oryza sativa (japonica cultivar-group)]	BJ307443	n	n	n	n	up	untreated	67.0324	183.628	103.077	183.845	86.7303	98.8855	11.7923	24.6392	14.6339	57.2325	7.8878	15.5307
Ta.10108.3.S1_a_at	Os08g31470.1	expressed protein	Hypothetical protein P0453D01.16-1 [Oryza sativa (japonica cultivar-group)]	BJ307443	n	n	n	n	up	treated	53.2794	181.598	207.054	194.619	169.739	219.051	3.05233	7.72453	76.7273	30.4858	12.4469	15.2349
Ta.10114.1.S1_at	Os03g60460.1	leukotriene A-4 hydrolase, putative, expressed	Putative leukotriene A-4 hydrolase [Oryza sativa (japonica cultivar-group)]	TA79183_4565	n	n	n	up	n	untreated	652.197	529.491	572.306	527.455	630.113	724.623	75.9344	89.6503	57.9589	101.984	56.3335	226.161
Ta.10114.1.S1_at	Os03g60460.1	leukotriene A-4 hydrolase, putative, expressed	Putative leukotriene A-4 hydrolase [Oryza sativa (japonica cultivar-group)]	TA79183_4565	n	n	n	up	n	treated	621.473	525.168	840.963	894.787	1777.01	1872.5	58.3383	238.936	117.229	41.1008	71.912	174.541
Ta.10117.1.S1_a_at	Os12g18110.1	cystinosin, putative, expressed	Lysosomal Cystine Transporter [Oryza sativa (japonica cultivar-group)]	CA646681	n	n	n	up	n	untreated	945.711	1152.83	2523.21	2339.15	1088.34	952.411	69.3298	305.965	233.338	297.577	198.309	130.28
Ta.10117.1.S1_a_at	Os12g18110.1	cystinosin, putative, expressed	Lysosomal Cystine Transporter [Oryza sativa (japonica cultivar-group)]	CA646681	n	n	n	up	n	treated	896.159	1621.77	2179.79	2074.33	2764.91	1834.6	25.317	518.926	521.485	173.915	227.532	237.274
Ta.10120.1.S1_at	Os02g39160.1	hydroxymethylbutenyl 4-diphosphate synthase, putative, expressed	GcpE [Lycopersicon esculentum (Tomato)]	TA70322_4565	n	n	n	down	down	untreated	2541.85	2732.26	3574.43	1416.84	3680.92	4676.38	450.868	187.507	176.157	136.878	189.336	977.025
Ta.10120.1.S1_at	Os02g39160.1	hydroxymethylbutenyl 4-diphosphate synthase, putative, expressed	GcpE [Lycopersicon esculentum (Tomato)]	TA70322_4565	n	n	n	down	down	treated	2466.82	2018.26	2503.28	1672.97	457.374	1129.07	261.565	170.191	202.846	315.615	5.93683	219.437
Ta.10120.1.S1_x_at	Os02g39160.1	hydroxymethylbutenyl 4-diphosphate synthase, putative, expressed	GcpE [Lycopersicon esculentum (Tomato)]	TA70322_4565	n	n	n	down	down	untreated	2730.25	2842.19	3720.89	1521.81	4016.38	4910.59	512.375	158.919	161.459	264.055	194.458	961.319
Ta.10120.1.S1_x_at	Os02g39160.1	hydroxymethylbutenyl 4-diphosphate synthase, putative, expressed	GcpE [Lycopersicon esculentum (Tomato)]	TA70322_4565	n	n	n	down	down	treated	2594.74	2078.27	2702.99	1763.89	470.915	1161.41	215.225	245.28	237.104	321.223	13.1801	288.423
Ta.10124.1.S1_at	Os07g31280.2	casein kinase II subunit beta-4, putative, expressed	Protein kinase CK2 regulatory subunit CK2B3 [Zea mays (Maize)]	TA84122_4565	n	n	n	down	n	untreated	1553.04	876.131	1295.96	1494.11	1491.35	1256.98	98.5496	25.262	41.24	150.963	43.0667	54.5625
Ta.10124.1.S1_at	Os07g31280.2	casein kinase II subunit beta-4, putative, expressed	Protein kinase CK2 regulatory subunit CK2B3 [Zea mays (Maize)]	TA84122_4565	n	n	n	down	n	treated	1465.86	807.949	1081.61	952.625	544.471	767.434	92.7336	83.5518	100.168	50.7197	53.9833	95.1556
Ta.10126.2.S1_a_at	Os01g68860.1	zinc finger CCCH type domain-containing protein ZFN-like 2, putative, expressed	Zinc finger CCCH type domain-containing protein ZFN-like 2 [Oryza sativa (Rice)]	CA641278	n	n	n	down	n	untreated	2250.98	1484.7	1087.41	927.449	1885.16	1740.53	266.476	188.817	76.6647	206.641	166.016	342.368
Ta.10126.2.S1_a_at	Os01g68860.1	zinc finger CCCH type domain-containing protein ZFN-like 2, putative, expressed	Zinc finger CCCH type domain-containing protein ZFN-like 2 [Oryza sativa (Rice)]	CA641278	n	n	n	down	n	treated	2335.08	899.516	1112.84	600.982	688.525	860.685	298.356	301.956	423.426	122.595	30.4129	97.7686
Ta.10126.3.S1_a_at	Os01g68860.2	zinc finger CCCH type domain-containing protein ZFN-like 2, putative, expressed	Zinc finger CCCH type domain-containing protein ZFN-like 2 [Oryza sativa (Rice)]	CA636210	n	n	n	down	n	untreated	5131.35	3256.96	2250.75	2079.92	4402.01	3938.8	409.528	443.769	94.5051	512.884	482.788	806.863
Ta.10126.3.S1_a_at	Os01g68860.2	zinc finger CCCH type domain-containing protein ZFN-like 2, putative, expressed	Zinc finger CCCH type domain-containing protein ZFN-like 2 [Oryza sativa (Rice)]	CA636210	n	n	n	down	n	treated	5171.02	1942.44	2391.98	1417.09	1363.66	1902.81	509.15	629.158	1058.54	423.835	55.5261	190.597
Ta.10129.1.S1_at	Os01g51120.1	vesicle transport v-SNARE 13, putative, expressed	Vesicle transport v-SNARE (Vesicle soluble NSF attachment protein receptor) protein-like [Oryza sativa (japonica cultivar-group)]	TA74124_4565	n	n	n	up	n	untreated	612.672	1082.04	781.322	595.242	624.307	671.753	82.6946	134.96	70.8623	26.3984	29.2593	139.911
Ta.10129.1.S1_at	Os01g51120.1	vesicle transport v-SNARE 13, putative, expressed	Vesicle transport v-SNARE (Vesicle soluble NSF attachment protein receptor) protein-like [Oryza sativa (japonica cultivar-group)]	TA74124_4565	n	n	n	up	n	treated	616.366	1018.36	801.087	718.824	1466.32	1216.13	56.0601	267.998	83.6008	21.001	178.474	207.897
Ta.1013.1.S1_at	Os07g26690.1	aquaporin PIP2.1, putative, expressed	Plasma membrane intrinsic protein 2-1 [Pyrus communis (Pear)]	TA63087_4565	n	n	down	down	n	untreated	2232.67	2454.96	1577.32	1751.14	2918.47	2828.28	229.879	190.988	59.0855	282.866	96.5592	101.181
Ta.1013.1.S1_at	Os07g26690.1	aquaporin PIP2.1, putative, expressed	Plasma membrane intrinsic protein 2-1 [Pyrus communis (Pear)]	TA63087_4565	n	n	down	down	n	treated	2102.88	1661.38	1292.73	858.627	769.773	2301.05	80.5297	676.902	85.2918	44.5803	39.2415	326.788
Ta.10141.1.S1_at	Os07g48960.1	lon protease homolog 2, mitochondrial precursor, putative, expressed	Putative ATP-dependent proteinase LON2 [Oryza sativa (japonica cultivar-group)]	TA83812_4565	n	n	n	n	up	untreated	180.665	140.208	163.577	356.705	178.209	173.673	41.783	51.644	28.2045	31.9619	34.8808	30.5084
Ta.10141.1.S1_at	Os07g48960.1	lon protease homolog 2, mitochondrial precursor, putative, expressed	Putative ATP-dependent proteinase LON2 [Oryza sativa (japonica cultivar-group)]	TA83812_4565	n	n	n	n	up	treated	151.514	201.53	240.975	425.19	346.773	705.075	11.0173	193.041	51.8764	16.4181	20.5535	89.2016
Ta.10143.1.S1_a_at	Os12g03540.1	cytochrome cd1-nitrite reductase-like, C-terminal haem d1, putative, expressed	Expressed protein [Oryza sativa (japonica cultivar-group)]	TA80374_4565	n	n	n	up	n	untreated	411.801	604.288	535.341	575.067	391.371	394.027	21.9522	37.736	58.6366	47.524	26.0365	125.826
Ta.10143.1.S1_a_at	Os12g03540.1	cytochrome cd1-nitrite reductase-like, C-terminal haem d1, putative, expressed	Expressed protein [Oryza sativa (japonica cultivar-group)]	TA80374_4565	n	n	n	up	n	treated	399.252	781.91	901.596	1104	1136.06	767.926	34.997	253.037	20.8266	33.9184	92.3673	113.999
Ta.10143.1.S1_x_at	Os12g03540.1	cytochrome cd1-nitrite reductase-like, C-terminal haem d1, putative, expressed	Expressed protein [Oryza sativa (japonica cultivar-group)]	TA80373_4565	n	n	n	up	n	untreated	320.636	447.277	364.653	441.961	275.778	283.082	14.1208	6.90313	19.3834	22.1345	24.9762	76.8628
Ta.10143.1.S1_x_at	Os12g03540.1	cytochrome cd1-nitrite reductase-like, C-terminal haem d1, putative, expressed	Expressed protein [Oryza sativa (japonica cultivar-group)]	TA80373_4565	n	n	n	up	n	treated	307.389	570.997	675.987	804.097	785.015	517.885	11.962	177.05	58.6641	29.1546	37.6566	96.8631
Ta.10143.2.S1_a_at	Os12g03540.1	cytochrome cd1-nitrite reductase-like, C-terminal haem d1, putative, expressed	Expressed protein [Oryza sativa (japonica cultivar-group)]	TA80373_4565	n	up	n	up	n	untreated	189.193	274.689	203.959	288.016	158.738	153.146	24.4631	33.5099	10.5598	57.3019	21.1186	59.6157
Ta.10143.2.S1_a_at	Os12g03540.1	cytochrome cd1-nitrite reductase-like, C-terminal haem d1, putative, expressed	Expressed protein [Oryza sativa (japonica cultivar-group)]	TA80373_4565	n	up	n	up	n	treated	173.116	346.17	504.73	539.086	524.598	339.679	16.9467	116.264	136.486	79.5617	14.7321	50.0778
Ta.10143.3.S1_x_at	Os11g03794.1	aladin, putative, expressed	Expressed protein [Oryza sativa (japonica cultivar-group)]	CA745853	n	n	n	up	n	untreated	272.891	367.558	336.573	323.786	253.102	281.466	3.34249	30.0332	15.1913	49.9078	6.57328	62.6676
Ta.10143.3.S1_x_at	Os11g03794.1	aladin, putative, expressed	Expressed protein [Oryza sativa (japonica cultivar-group)]	CA745853	n	n	n	up	n	treated	285.185	422.917	474.953	525.947	641.765	464.592	11.0632	102.163	38.1768	53.5436	54.3438	74.6708
Ta.10148.1.S1_at	Os03g42770.1	expressed protein	Putative U3 small nucleolar ribonucleoprotein complex-associated protein [Oryza sativa (japonica cultivar-group)]	TA96374_4565	n	n	n	down	n	untreated	19.6192	38.2343	32.3558	108.342	56.8328	48.095	1.55588	23.1202	9.82261	18.635	14.3002	6.37476
Ta.10148.1.S1_at	Os03g42770.1	expressed protein	Putative U3 small nucleolar ribonucleoprotein complex-associated protein [Oryza sativa (japonica cultivar-group)]	TA96374_4565	n	n	n	down	n	treated	21.5093	53.1321	50.1046	119.847	26.3639	81.8681	1.84736	50.6264	15.382	10.5965	4.40195	20.6443
Ta.10151.1.S1_at	Os05g28510.3	importin beta-1 subunit, putative, expressed	NA	CK171188	n	n	n	down	n	untreated	269.108	362.528	327.32	393.966	383.314	311.1	61.0582	72.5826	19.6522	32.841	23.6029	19.0967
Ta.10151.1.S1_at	Os05g28510.3	importin beta-1 subunit, putative, expressed	NA	CK171188	n	n	n	down	n	treated	249.746	359.963	288.959	344.196	172.771	253.815	14.5413	34.194	18.8983	34.8645	14.8484	26.9687
Ta.10155.1.A1_at	Os01g68120.1	DCL3, putative, expressed	Putative Endoribonuclease Dicer homolog [Oryza sativa (japonica cultivar-group)]	TA96516_4565	n	n	n	n	up	untreated	305.008	253.283	265.725	356.105	336.676	319.438	14.4117	10.2511	10.5776	29.8927	36.1136	8.43734
Ta.10155.1.A1_at	Os01g68120.1	DCL3, putative, expressed	Putative Endoribonuclease Dicer homolog [Oryza sativa (japonica cultivar-group)]	TA96516_4565	n	n	n	n	up	treated	295.577	224.471	238.486	308.809	476.213	976.582	25.9862	69.6373	20.131	21.9632	45.184	189.027
Ta.10155.2.S1_at	Os01g68120.1	DCL3, putative, expressed	Putative Endoribonuclease Dicer homolog [Oryza sativa (japonica cultivar-group)]	TA95497_4565	n	n	n	n	up	untreated	108.476	85.5175	87.2913	142.831	115.86	102.87	1.14225	13.5175	12.8524	19.3761	10.4926	8.72214
Ta.10155.2.S1_at	Os01g68120.1	DCL3, putative, expressed	Putative Endoribonuclease Dicer homolog [Oryza sativa (japonica cultivar-group)]	TA95497_4565	n	n	n	n	up	treated	86.2097	79.4096	89.894	112.559	196.786	447.934	13.1945	30.6657	16.0441	5.89201	8.5997	79.9233
Ta.10162.1.S1_at	Os03g34040.1	30S ribosomal protein S5, putative, expressed	Putative ribosomal protein [Oryza sativa (japonica cultivar-group)]	TA66349_4565	n	n	n	down	down	untreated	2826.08	1287.45	1183.61	1559.11	1416.69	2291.81	225.573	97.682	330.935	508.628	124.763	1263.21
Ta.10162.1.S1_at	Os03g34040.1	30S ribosomal protein S5, putative, expressed	Putative ribosomal protein [Oryza sativa (japonica cultivar-group)]	TA66349_4565	n	n	n	down	down	treated	2688.08	903.415	1046.21	784.444	166.181	52.7994	240.087	233.522	511.695	283.403	91.1451	8.57238
Ta.10164.1.S1_x_at	Os03g12110.1	homocysteine S-methyltransferase 1, putative, expressed	Putative homocysteine S-methyltransferase-1 [Oryza sativa (japonica cultivar-group)]	TA80650_4565	n	up	up	up	n	untreated	20.6114	29.1091	20.6388	24.2778	22.3771	28.9647	2.45525	3.00251	2.329	2.97616	2.1797	13.6586
Ta.10164.1.S1_x_at	Os03g12110.1	homocysteine S-methyltransferase 1, putative, expressed	Putative homocysteine S-methyltransferase-1 [Oryza sativa (japonica cultivar-group)]	TA80650_4565	n	up	up	up	n	treated	20.4934	86.0598	68.0929	153.568	148.458	42.3952	1.40249	46.7017	2.59213	5.28784	38.6138	9.80589
Ta.10164.2.S1_a_at	Os03g12110.1	homocysteine S-methyltransferase 1, putative, expressed	Putative homocysteine S-methyltransferase-1 [Oryza sativa (japonica cultivar-group)]	TA80650_4565	n	up	up	up	n	untreated	52.2166	63.0244	49.9915	57.7193	47.6343	54.2853	3.18325	7.89018	7.84439	7.29151	2.97541	9.12538
Ta.10164.2.S1_a_at	Os03g12110.1	homocysteine S-methyltransferase 1, putative, expressed	Putative homocysteine S-methyltransferase-1 [Oryza sativa (japonica cultivar-group)]	TA80650_4565	n	up	up	up	n	treated	48.451	148.075	102.443	204.389	134.88	78.8431	1.61385	73.8163	15.7347	29.0089	29.546	10.3337
Ta.10166.1.A1_at	Os10g41780.2	chlorophyllide a oxygenase, chloroplast precursor, putative, expressed	Chlorophyll synthase, putative [Oryza sativa (japonica cultivar-group)]	TA55150_4565	n	n	down	down	down	untreated	8206.38	6479.64	8582.11	5846.49	7815.89	8358.64	487.381	1603.73	999.567	720.01	628.431	444.891
Ta.10166.1.A1_at	Os10g41780.2	chlorophyllide a oxygenase, chloroplast precursor, putative, expressed	Chlorophyll synthase, putative [Oryza sativa (japonica cultivar-group)]	TA55150_4565	n	n	down	down	down	treated	8339.79	3305.65	5391.73	1494.19	386.036	1554.56	302.142	1584.18	995.361	123.188	102.826	207.335
Ta.10168.1.S1_at	Os06g14490.1	calmodulin-binding heat-shock protein, putative, expressed	Putative calmodulin-binding heat-shock protein [Arabidopsis thaliana (Mouse-ear cress)]	TA78858_4565	n	up	up	up	n	untreated	1029.39	298.436	324.371	201.596	207.685	383.771	200.296	54.7284	72.6964	11.9514	44.6721	372.181
Ta.10168.1.S1_at	Os06g14490.1	calmodulin-binding heat-shock protein, putative, expressed	Putative calmodulin-binding heat-shock protein [Arabidopsis thaliana (Mouse-ear cress)]	TA78858_4565	n	up	up	up	n	treated	953.848	966.206	1269.14	1726.11	3552.33	2112.08	95.4649	717.89	82.4516	46.8905	113.03	81.521
Ta.10176.1.S1_at	Os03g19690.1	expressed protein	Hypothetical protein dl4125c [Arabidopsis thaliana (Mouse-ear cress)]	TA79678_4565	n	n	n	up	up	untreated	129.41	180.561	149.886	162.946	133.685	115.464	9.66131	42.362	10.3428	41.2195	18.6059	16.5656
Ta.10176.1.S1_at	Os03g19690.1	expressed protein	Hypothetical protein dl4125c [Arabidopsis thaliana (Mouse-ear cress)]	TA79678_4565	n	n	n	up	up	treated	117.237	251.242	200.645	329.064	318.338	274.917	10.7447	85.5308	34.2451	54.8789	7.01944	21.4247
Ta.10182.1.S1_at	Os01g72200.1	expressed protein	B1147A04.19 [Oryza sativa (japonica cultivar-group)]	TA94223_4565	n	n	n	down	n	untreated	407.453	326.252	257.5	311.945	360.515	292.249	57.0296	24.9791	8.75311	30.0703	26.9201	14.6081
Ta.10182.1.S1_at	Os01g72200.1	expressed protein	B1147A04.19 [Oryza sativa (japonica cultivar-group)]	TA94223_4565	n	n	n	down	n	treated	424.316	272.102	220.271	230.335	150.948	174.175	27.3706	36.5197	24.9522	18.4561	17.6623	13.8353
Ta.10187.1.A1_at	Os04g39420.1	6-phosphofructokinase 2, putative, expressed	NA	TA91984_4565	n	n	n	down	n	untreated	162.735	121.744	143.474	188.043	165.439	139.999	40.372	26.2981	8.14423	35.9371	6.94049	8.39487
Ta.10187.1.A1_at	Os04g39420.1	6-phosphofructokinase 2, putative, expressed	NA	TA91984_4565	n	n	n	down	n	treated	135.729	133.538	131.528	142.055	72.4843	93.4038	11.8369	17.3433	8.1024	7.37585	10.9305	10.0829
Ta.10189.2.S1_at	Os05g44310.1	vesicle-fusing ATPase, putative, expressed	Putative N-ethylmaleimide sensitive fusion protein [Oryza sativa (japonica cultivar-group)]	TA63154_4565	n	n	n	up	up	untreated	212.342	362.952	226.86	238.807	211.352	203.192	11.2948	67.6998	13.2892	5.2719	17.4926	39.135
Ta.10189.2.S1_at	Os05g44310.1	vesicle-fusing ATPase, putative, expressed	Putative N-ethylmaleimide sensitive fusion protein [Oryza sativa (japonica cultivar-group)]	TA63154_4565	n	n	n	up	up	treated	184.542	372.11	336.96	388.258	600.649	566.6	24.3923	26.1026	49.0703	22.6942	1.71808	65.1758
Ta.10189.3.S1_a_at	Os05g44310.1	vesicle-fusing ATPase, putative, expressed	N-ethylmaleimide sensitive fusion protein [Nicotiana tabacum (Common tobacco)]	CA641535	n	n	n	up	up	untreated	659.287	1233.94	598.566	767.222	680.228	731.915	40.3943	184.136	24.4407	49.5767	20.2888	181.989
Ta.10189.3.S1_a_at	Os05g44310.1	vesicle-fusing ATPase, putative, expressed	N-ethylmaleimide sensitive fusion protein [Nicotiana tabacum (Common tobacco)]	CA641535	n	n	n	up	up	treated	601.819	1276.29	993.064	1373.71	1955.69	2267.29	53.3844	72.405	95.2688	122.241	70.3583	90.2939
Ta.10193.3.S1_a_at	Os03g04410.1	aconitate hydratase, cytoplasmic, putative, expressed	Putative Aconitate hydratase [Oryza sativa (japonica cultivar-group)]	TA65213_4565	n	n	n	up	n	untreated	1651.11	2567.47	1488.4	1973.82	1529.44	1394.47	39.974	458.744	100.675	535.817	88.0713	180.725
Ta.10193.3.S1_a_at	Os03g04410.1	aconitate hydratase, cytoplasmic, putative, expressed	Putative Aconitate hydratase [Oryza sativa (japonica cultivar-group)]	TA65213_4565	n	n	n	up	n	treated	1560.22	3219.07	2371.21	2576.93	3172.93	2529.51	55.3958	633.527	620.017	187	209.74	99.0563
Ta.10194.1.S1_at	Os08g16570.1	expressed protein	T24D18.18 protein [Arabidopsis thaliana (Mouse-ear cress)]	TA79439_4565	n	n	n	down	down	untreated	1983.17	1352.96	755.501	1358.53	1683.79	1909.48	83.1425	18.8262	69.2483	410.422	261.444	260.725
Ta.10194.1.S1_at	Os08g16570.1	expressed protein	T24D18.18 protein [Arabidopsis thaliana (Mouse-ear cress)]	TA79439_4565	n	n	n	down	down	treated	2200.89	1032.26	727.022	1025.23	228.977	366.706	46.5719	100.502	302.288	208.528	19.8908	106.814
Ta.10197.1.S1_at	Os03g02610.1	xyloglucan endotransglucosylase/hydrolase protein 5 precursor, putative, expressed	NA	TA105646_4565	n	n	n	down	n	untreated	416.97	214.786	310.871	345.005	330.512	347.539	54.0232	38.0818	43.9476	121.543	50.2773	161.034
Ta.10197.1.S1_at	Os03g02610.1	xyloglucan endotransglucosylase/hydrolase protein 5 precursor, putative, expressed	NA	TA105646_4565	n	n	n	down	n	treated	393.242	179.931	206.409	166.648	62.7137	112.886	45.3189	31.1888	100.828	70.129	6.5563	20.5113
Ta.10204.1.S1_at	Os01g59930.1	NADH-cytochrome b5 reductase, putative, expressed	Cytochrome b5 reductase [Zea mays (Maize)]	TA68413_4565	n	n	up	up	n	untreated	619.253	1514.55	746.915	935.774	792.583	1103.76	78.1433	280.551	148.437	176.925	40.6705	220.677
Ta.10204.1.S1_at	Os01g59930.1	NADH-cytochrome b5 reductase, putative, expressed	Cytochrome b5 reductase [Zea mays (Maize)]	TA68413_4565	n	n	up	up	n	treated	589.185	1846.41	1462.98	1940.59	1715.36	1108.29	63.9773	123.553	87.8704	20.7487	110.41	26.1023
Ta.10204.2.A1_a_at	Os01g59930.1	NADH-cytochrome b5 reductase, putative, expressed	Cytochrome b5 reductase isoform II [Zea mays (Maize)]	TA68412_4565	n	n	n	up	n	untreated	690.908	1606.09	754.261	952.343	781.451	1079.82	41.1671	330.739	115.667	244.447	38.2562	302.558
Ta.10204.2.A1_a_at	Os01g59930.1	NADH-cytochrome b5 reductase, putative, expressed	Cytochrome b5 reductase isoform II [Zea mays (Maize)]	TA68412_4565	n	n	n	up	n	treated	599.761	2051.43	1377.68	1812.49	1613.51	1010.55	88.2245	127.364	78.0263	83.7825	112.296	32.267
Ta.10204.2.A1_at	Os01g59930.1	NADH-cytochrome b5 reductase, putative, expressed	Cytochrome b5 reductase isoform II [Zea mays (Maize)]	TA68411_4565	n	up	n	n	n	untreated	133.017	422.18	126.275	191.055	133.554	220.884	12.1127	116.616	37.5985	39.2321	14.808	78.7228
Ta.10204.2.A1_at	Os01g59930.1	NADH-cytochrome b5 reductase, putative, expressed	Cytochrome b5 reductase isoform II [Zea mays (Maize)]	TA68411_4565	n	up	n	n	n	treated	109.222	472.286	307.038	360.222	261.323	211.861	24.7662	103.137	31.0395	5.34932	47.4479	20.0284
Ta.10204.3.S1_a_at	Os01g59930.1	NADH-cytochrome b5 reductase, putative, expressed	Cytochrome b5 reductase [Zea mays (Maize)]	CJ630738	n	up	n	up	n	untreated	836.123	2102.07	969.132	1323.75	1024.47	1492.18	144.314	494.06	273.656	279.615	51.5468	347.944
Ta.10204.3.S1_a_at	Os01g59930.1	NADH-cytochrome b5 reductase, putative, expressed	Cytochrome b5 reductase [Zea mays (Maize)]	CJ630738	n	up	n	up	n	treated	740.839	2595.85	2094.89	2334.16	2207.33	1223.4	159.984	239.158	200.182	55.6722	145.925	101.562
Ta.10206.1.S1_at	Os03g49940.1	integral membrane protein DUF6 containing protein, expressed	Hypothetical protein OSJNBb0022E02.3 [Oryza sativa (Rice)]	TA99911_4565	n	n	down	down	n	untreated	531.021	1482.29	309.221	232.981	620.285	496.121	235.82	90.2709	101.025	20.0388	13.5658	151.319
Ta.10206.1.S1_at	Os03g49940.1	integral membrane protein DUF6 containing protein, expressed	Hypothetical protein OSJNBb0022E02.3 [Oryza sativa (Rice)]	TA99911_4565	n	n	down	down	n	treated	437.612	802.495	195.87	112.641	178.94	352.637	105.769	598.347	27.4341	2.17974	14.1504	21.3555
Ta.10214.1.S1_at	Os09g25490.1	CESA9 - cellulose synthase, expressed	Cellulose synthase catalytic subunit 12 [Zea mays (Maize)]	TA64763_4565	n	n	n	down	n	untreated	64.1376	59.3967	43.0522	86.7273	98.9463	238.013	22.3153	28.8427	14.7536	78.851	37.7983	306.875
Ta.10214.1.S1_at	Os09g25490.1	CESA9 - cellulose synthase, expressed	Cellulose synthase catalytic subunit 12 [Zea mays (Maize)]	TA64763_4565	n	n	n	down	n	treated	76.8483	49.2101	42.6299	82.9592	35.9915	29.6952	38.3828	14.5122	20.1988	11.1319	2.05022	3.98047
Ta.1022.1.S1_at	Os02g01220.1	senescence-associated protein DIN1, putative, expressed	Putative senescence-associated protein [Oryza sativa (japonica cultivar-group)]	TA81036_4565	n	n	n	down	n	untreated	70.2649	58.8033	64.327	79.6921	100.147	85.8202	12.5888	10.557	13.7366	32.6018	8.93822	11.1468
Ta.1022.1.S1_at	Os02g01220.1	senescence-associated protein DIN1, putative, expressed	Putative senescence-associated protein [Oryza sativa (japonica cultivar-group)]	TA81036_4565	n	n	n	down	n	treated	74.5278	74.9229	60.2809	73.85	28.8516	40.6289	3.67072	7.04364	21.0235	9.3975	5.15753	17.4387
Ta.10230.1.S1_at	Os07g07230.1	ATP binding protein, putative, expressed	Putative brassinosteroid LRR receptor kinase protein [Oryza sativa (japonica cultivar-group)]	TA77809_4565	n	n	n	down	down	untreated	162.502	126.699	126.064	232.573	228.074	207.511	32.6069	21.9786	22.3448	53.1676	6.64506	36.3803
Ta.10230.1.S1_at	Os07g07230.1	ATP binding protein, putative, expressed	Putative brassinosteroid LRR receptor kinase protein [Oryza sativa (japonica cultivar-group)]	TA77809_4565	n	n	n	down	down	treated	153.609	103.566	129.216	178.827	38.0051	54.4525	13.936	44.0958	21.2494	15.8762	10.5676	13.3024
Ta.10230.2.S1_a_at	Os07g07230.1	ATP binding protein, putative, expressed	Putative brassinosteroid LRR receptor kinase protein [Oryza sativa (japonica cultivar-group)]	TA77807_4565	n	n	n	down	n	untreated	82.5055	62.546	55.95	96.3019	88.0301	92.8504	13.0152	8.20157	2.32733	25.3161	3.35719	17.8931
Ta.10230.2.S1_a_at	Os07g07230.1	ATP binding protein, putative, expressed	Putative brassinosteroid LRR receptor kinase protein [Oryza sativa (japonica cultivar-group)]	TA77807_4565	n	n	n	down	n	treated	73.4294	49.6068	54.6403	60.4553	37.3041	40.4838	10.4963	6.64322	11.24	8.68602	2.41643	8.29822
Ta.10232.1.S1_a_at	Os06g47330.1	EH-domain-containing protein 1, putative, expressed	Putative receptor Mediated Endocytosis RME-1 [Oryza sativa (japonica cultivar-group)]	TA73123_4565	n	n	n	up	n	untreated	552.409	1020.29	437.122	408.04	401.74	352.122	44.884	144.022	15.2928	31.6282	32.9793	120.593
Ta.10232.1.S1_a_at	Os06g47330.1	EH-domain-containing protein 1, putative, expressed	Putative receptor Mediated Endocytosis RME-1 [Oryza sativa (japonica cultivar-group)]	TA73123_4565	n	n	n	up	n	treated	542.872	904.999	521.45	576.258	976.829	638.129	18.1048	308.669	10.4308	42.3868	52.2115	9.84357
Ta.10232.3.S1_a_at	Os06g47330.1	EH-domain-containing protein 1, putative, expressed	Putative receptor Mediated Endocytosis RME-1 [Oryza sativa (japonica cultivar-group)]	TA73125_4565	n	n	n	up	n	untreated	2214.33	4373.97	1902.54	2190.42	1919.68	1612.53	245.562	661.107	42.0751	213.035	131.095	635.189
Ta.10232.3.S1_a_at	Os06g47330.1	EH-domain-containing protein 1, putative, expressed	Putative receptor Mediated Endocytosis RME-1 [Oryza sativa (japonica cultivar-group)]	TA73125_4565	n	n	n	up	n	treated	2012.83	4317.56	2626.28	3321.52	6374.78	4289.17	280.488	1034.06	86.2222	66.6866	200.032	181.143
Ta.10232.3.S1_at	Os06g47330.1	EH-domain-containing protein 1, putative, expressed	Putative receptor-mediated endocytosis 1 isoform I [Oryza sativa (japonica cultivar-group)]	TA73121_4565	n	n	n	up	n	untreated	1121.1	2099.35	961.191	867.85	842.333	732.524	69.4802	362.872	51.4874	91.5719	91.0919	244.049
Ta.10232.3.S1_at	Os06g47330.1	EH-domain-containing protein 1, putative, expressed	Putative receptor-mediated endocytosis 1 isoform I [Oryza sativa (japonica cultivar-group)]	TA73121_4565	n	n	n	up	n	treated	1015.09	1875.77	1230.07	1230.38	2191.52	1426.6	46.121	625.939	87.4831	42.9402	60.1749	32.8243
Ta.10234.1.A1_at	Os11g41380.1	transposon protein, putative, unclassified	NA	TA56142_4565	n	n	n	down	n	untreated	564.728	498.07	553.28	664.636	670.962	537.758	86.552	15.7678	85.31	32.7707	28.2735	13.1341
Ta.10234.1.A1_at	Os11g41380.1	transposon protein, putative, unclassified	NA	TA56142_4565	n	n	n	down	n	treated	557.675	447.074	447.088	431.643	314.568	354.783	3.4087	18.9597	33.7355	15.7382	16.1831	22.8074
Ta.10236.1.A1_at	Os11g17380.1	protein kinase domain containing protein	Protein kinase domain, putative [Oryza sativa (japonica cultivar-group)]	TA78368_4565	n	up	up	up	n	untreated	4310.5	704.168	440.523	209.439	163.299	994.722	330.809	48.5928	162.291	55.3381	57.793	1346.81
Ta.10236.1.A1_at	Os11g17380.1	protein kinase domain containing protein	Protein kinase domain, putative [Oryza sativa (japonica cultivar-group)]	TA78368_4565	n	up	up	up	n	treated	4309.91	2322.78	1599.48	3819.59	10849.2	3630.71	540.046	1561.85	501.003	273.213	397.067	322.053
Ta.10236.2.S1_a_at	Os11g17380.1	protein kinase domain containing protein	Protein kinase domain, putative [Oryza sativa (japonica cultivar-group)]	TA78368_4565	n	up	up	up	n	untreated	5190.92	780.76	558.169	236.75	181.479	1083.72	1023.98	59.5804	241.574	63.7335	96.2968	1464.26
Ta.10236.2.S1_a_at	Os11g17380.1	protein kinase domain containing protein	Protein kinase domain, putative [Oryza sativa (japonica cultivar-group)]	TA78368_4565	n	up	up	up	n	treated	4897.1	2704.26	2091.78	4406.32	11454.3	3635.8	977.001	1922.61	308.613	147.454	215.965	759.406
Ta.10236.2.S1_at	Os11g17380.1	protein kinase domain containing protein	Protein kinase domain, putative [Oryza sativa (japonica cultivar-group)]	TA78368_4565	n	up	up	up	n	untreated	2999.31	485.327	319.204	159.123	117.954	623.576	361.642	67.1514	119.03	35.0103	56.1616	835.13
Ta.10236.2.S1_at	Os11g17380.1	protein kinase domain containing protein	Protein kinase domain, putative [Oryza sativa (japonica cultivar-group)]	TA78368_4565	n	up	up	up	n	treated	3071.07	1585.75	1218.41	2646.66	6481.04	2059.58	366.104	1029.08	185.551	131.249	209.799	428.012
Ta.10236.2.S1_x_at	Os11g17380.1	protein kinase domain containing protein	Protein kinase domain, putative [Oryza sativa (japonica cultivar-group)]	TA78368_4565	n	up	up	up	n	untreated	3279.28	526.607	349.749	181.639	125.683	699.619	322.91	54.234	148.895	52.2609	62.4051	951.018
Ta.10236.2.S1_x_at	Os11g17380.1	protein kinase domain containing protein	Protein kinase domain, putative [Oryza sativa (japonica cultivar-group)]	TA78368_4565	n	up	up	up	n	treated	3182.54	1734.19	1305.88	2907.95	7200.29	2305.88	375.049	1135.06	201.614	211.975	213.266	464.357
Ta.10237.1.S1_at	Os10g40550.1	trehalose-phosphate phosphatase, putative, expressed	Trehalose-6-phosphate phosphatase, putative [Oryza sativa (japonica cultivar-group)]	TA78785_4565	n	up	up	up	up	untreated	803.751	133.397	101.005	137.033	256.148	173.855	502.126	25.6193	4.4843	9.43739	32.885	24.2539
Ta.10237.1.S1_at	Os10g40550.1	trehalose-phosphate phosphatase, putative, expressed	Trehalose-6-phosphate phosphatase, putative [Oryza sativa (japonica cultivar-group)]	TA78785_4565	n	up	up	up	up	treated	703.612	245.01	248.126	449.5	7386.18	1641.7	118.264	160.158	51.4901	17.6985	1443.43	184.302
Ta.10237.2.S1_at	Os10g40550.1	trehalose-phosphate phosphatase, putative, expressed	Trehalose-6-phosphate phosphatase, putative [Oryza sativa (japonica cultivar-group)]	BQ743743	n	up	up	up	up	untreated	244.061	41.2493	38.3634	47.717	81.282	55.1718	151.141	9.2245	9.4724	1.86913	5.46196	8.00167
Ta.10237.2.S1_at	Os10g40550.1	trehalose-phosphate phosphatase, putative, expressed	Trehalose-6-phosphate phosphatase, putative [Oryza sativa (japonica cultivar-group)]	BQ743743	n	up	up	up	up	treated	217.835	78.0792	87.1001	132.138	3009.72	562.133	36.9091	50.0641	16.115	2.67843	746.75	54.3024
Ta.10238.1.A1_at	Os01g56230.1	expressed protein	Expressed protein [Oryza sativa (japonica cultivar-group)]	TA89379_4565	n	n	n	up	up	untreated	32.1901	17.3615	20.3599	20.5407	17.9677	20.2689	14.4557	0.757455	0.712778	1.25539	2.15661	5.46972
Ta.10238.1.A1_at	Os01g56230.1	expressed protein	Expressed protein [Oryza sativa (japonica cultivar-group)]	TA89379_4565	n	n	n	up	up	treated	28.7151	28.4322	25.2017	30.3761	339.075	225.577	6.46103	3.37931	2.17912	1.18036	79.9253	44.5533
Ta.10238.2.S1_at	Os01g56230.1	expressed protein	Expressed protein [Oryza sativa (japonica cultivar-group)]	TA89379_4565	n	n	n	up	up	untreated	30.58	16.4172	17.883	18.7621	15.5422	14.393	16.3663	2.60633	4.34704	1.99246	2.97214	2.78311
Ta.10238.2.S1_at	Os01g56230.1	expressed protein	Expressed protein [Oryza sativa (japonica cultivar-group)]	TA89379_4565	n	n	n	up	up	treated	23.084	25.033	25.3746	28.6332	402.775	291.145	6.52956	8.4793	2.87424	2.86563	86.9506	45.5561
Ta.1024.1.S1_at	Os03g05520.1	nicotiana lesion-inducing like, putative, expressed	HR-like lesion-inducing [Oryza sativa (japonica cultivar-group)]	CA691417	n	up	up	up	up	untreated	663.09	1090.03	1159.89	1208.06	612.529	664.325	49.5019	240.212	101.201	151.844	110.374	206.738
Ta.1024.1.S1_at	Os03g05520.1	nicotiana lesion-inducing like, putative, expressed	HR-like lesion-inducing [Oryza sativa (japonica cultivar-group)]	CA691417	n	up	up	up	up	treated	595.498	2263.05	2508.6	3375.19	10137.5	2875.22	33.7078	1116.28	56.1597	92.6181	955.044	581.317
Ta.10240.1.S1_at	Os02g58730.1	rac-like GTP-binding protein 5, putative, expressed	Putative RACD protein [Hordeum vulgare (Barley)]	TA78296_4565	n	n	n	down	n	untreated	610.405	396.206	741.883	711.031	810.223	800.574	49.2872	76.2405	2.20402	36.7919	68.4372	84.3426
Ta.10240.1.S1_at	Os02g58730.1	rac-like GTP-binding protein 5, putative, expressed	Putative RACD protein [Hordeum vulgare (Barley)]	TA78296_4565	n	n	n	down	n	treated	622.642	347.913	554.822	467.565	203.953	438.133	27.0333	109.938	34.8544	4.66518	15.4148	17.2009
Ta.10240.1.S1_x_at	Os02g58730.1	rac-like GTP-binding protein 5, putative, expressed	Putative RACD protein [Hordeum vulgare (Barley)]	TA78295_4565	n	n	n	down	n	untreated	1401.36	950.77	1734.51	1704.59	1903.27	1794.67	101.143	175.029	24.7666	46.2283	155.101	127.608
Ta.10240.1.S1_x_at	Os02g58730.1	rac-like GTP-binding protein 5, putative, expressed	Putative RACD protein [Hordeum vulgare (Barley)]	TA78295_4565	n	n	n	down	n	treated	1408.59	822.586	1286.1	1120.01	492.852	1001.94	67.5538	237.829	118.476	54.0291	37.7513	45.9043
Ta.10240.2.S1_x_at	Os06g12790.1	rac-like GTP-binding protein 4, putative, expressed	Putative RACD protein [Hordeum vulgare (Barley)]	CA657539	n	n	n	down	n	untreated	143.269	116.761	169.755	159.423	172.325	157.564	23.536	8.37812	22.3691	32.6836	5.52293	16.5966
Ta.10240.2.S1_x_at	Os06g12790.1	rac-like GTP-binding protein 4, putative, expressed	Putative RACD protein [Hordeum vulgare (Barley)]	CA657539	n	n	n	down	n	treated	151.71	113	135.709	112.514	85.5767	115.329	9.64748	26.2074	6.11076	12.8479	9.90065	5.41298
Ta.10249.1.S1_at	Os11g01869.1	RBP2 protein, putative, expressed	NA	TA71831_4565	n	n	n	down	n	untreated	439.287	495.052	699.231	589.356	496.602	530.199	42.4667	17.1713	50.7372	27.5851	71.2173	68.4773
Ta.10249.1.S1_at	Os11g01869.1	RBP2 protein, putative, expressed	NA	TA71831_4565	n	n	n	down	n	treated	445.131	448.653	441.282	381.916	248.461	320.059	52.2845	28.9012	82.0036	28.266	10.3234	43.4683
Ta.10252.1.S1_at	Os10g24954.1	ulp1 protease family, C-terminal catalytic domain containing protein	NA	TA99367_4565	n	n	n	down	down	untreated	386.488	259.581	478.793	531.943	387.548	351.756	50.2373	36.4177	91.881	99.5438	41.3906	17.2386
Ta.10252.1.S1_at	Os10g24954.1	ulp1 protease family, C-terminal catalytic domain containing protein	NA	TA99367_4565	n	n	n	down	down	treated	372.846	235.861	314.069	285.735	75.0281	116.465	28.2821	32.7976	38.7691	20.4884	11.1153	27.2854
Ta.10259.1.S1_at	Os03g16860.1	heat shock cognate 70 kDa protein 2, putative, expressed	70 kDa heat shock protein [Sandersonia aurantiaca (Christmas-bells) (Chinese-lantern lily)]	TA62929_4565	n	up	up	up	n	untreated	1788.05	13970.9	550.505	659.955	3202.62	7006.4	267.85	3814.65	68.437	113.938	713.266	1131.6
Ta.10259.1.S1_at	Os03g16860.1	heat shock cognate 70 kDa protein 2, putative, expressed	70 kDa heat shock protein [Sandersonia aurantiaca (Christmas-bells) (Chinese-lantern lily)]	TA62929_4565	n	up	up	up	n	treated	1479.37	13449.2	2352.32	4607.98	11610	8704.15	389.046	7816.58	98.2614	415.331	1296.58	1062.15
Ta.10260.1.S1_at	Os11g39220.1	acyl-coenzyme A oxidase 1, putative, expressed	Acyl-CoA oxidase homolog [Oryza sativa (japonica cultivar-group)]	TA83704_4565	n	n	n	n	up	untreated	615.493	696.317	1561.21	872.056	615.959	371.931	170.136	351.444	396.331	247.26	184.113	190.261
Ta.10260.1.S1_at	Os11g39220.1	acyl-coenzyme A oxidase 1, putative, expressed	Acyl-CoA oxidase homolog [Oryza sativa (japonica cultivar-group)]	TA83704_4565	n	n	n	n	up	treated	578.416	894.009	1083.89	556.281	1547.65	1942.31	102.885	313.15	384.6	51.9454	565.425	32.3576
Ta.10274.1.S1_at	Os09g02810.1	CBF/Mak21 family protein, expressed	NA	TA81044_4565	n	n	n	down	n	untreated	280.805	174.379	268.172	359.093	267.428	225.871	49.0643	16.2781	17.4285	5.29565	19.9965	13.27
Ta.10274.1.S1_at	Os09g02810.1	CBF/Mak21 family protein, expressed	NA	TA81044_4565	n	n	n	down	n	treated	241.991	213.909	246.052	279.144	111.525	212.946	14.2632	80.14	11.3141	30.3779	5.90563	26.9022
Ta.10275.1.S1_at	Os01g11650.1	esterase precursor, putative, expressed	Putative esterase [Oryza sativa (japonica cultivar-group)]	TA71840_4565	n	n	n	up	up	untreated	299.287	215.369	249.764	280.108	275.334	273.144	43.0029	7.98913	68.4088	31.0025	22.6877	68.5511
Ta.10275.1.S1_at	Os01g11650.1	esterase precursor, putative, expressed	Putative esterase [Oryza sativa (japonica cultivar-group)]	TA71840_4565	n	n	n	up	up	treated	293.526	339.383	389.527	530.612	2827.87	1822.35	39.7217	202.639	12.7101	45.0503	516.54	199.304
Ta.10284.1.S1_a_at	Os05g42330.1	SC3 protein, putative, expressed	Secretory carrier membrane protein [Oryza sativa (Rice)]	TA72069_4565	n	n	n	up	n	untreated	624.799	782.942	425.188	483.117	462.575	461.229	47.1875	118.919	70.0178	134.227	46.7561	44.3861
Ta.10284.1.S1_a_at	Os05g42330.1	SC3 protein, putative, expressed	Secretory carrier membrane protein [Oryza sativa (Rice)]	TA72069_4565	n	n	n	up	n	treated	633.126	829.758	586.202	957.682	1496.62	870.531	64.5623	100.611	25.4497	22.2904	88.8399	112.167
Ta.10284.2.S1_a_at	Os05g42330.1	SC3 protein, putative, expressed	Secretory carrier membrane protein [Oryza sativa (Rice)]	TA72073_4565	n	n	n	up	n	untreated	194.693	228.538	137.998	149.249	157.927	138.264	17.0916	49.9964	19.4274	45.1727	29.3419	15.777
Ta.10284.2.S1_a_at	Os05g42330.1	SC3 protein, putative, expressed	Secretory carrier membrane protein [Oryza sativa (Rice)]	TA72073_4565	n	n	n	up	n	treated	177.508	264.52	195.579	268.625	497.106	281.137	28.3922	48.0138	7.11148	20.2807	33.8197	56.0416
Ta.1029.1.S1_x_at	Os12g25200.1	chloride channel protein CLC-a, putative, expressed	CLC-d chloride channel; anion channel protein [Oryza sativa (japonica cultivar-group)]	TA52825_4565	n	n	down	down	n	untreated	851.761	623.117	988.326	2228.29	820.953	789.721	111.172	201.454	61.3924	387.874	96.1971	245.694
Ta.1029.1.S1_x_at	Os12g25200.1	chloride channel protein CLC-a, putative, expressed	CLC-d chloride channel; anion channel protein [Oryza sativa (japonica cultivar-group)]	TA52825_4565	n	n	down	down	n	treated	787.825	552.938	484.889	593.959	98.6785	702.427	81.8351	66.7135	32.4697	69.5785	26.4088	173.088
Ta.10295.1.S1_at	Os01g45274.2	carbonic anhydrase, chloroplast precursor, putative, expressed	Carbonic anhydrase-like [Oryza sativa (japonica cultivar-group)]	TA55283_4565	n	n	n	n	down	untreated	1583.19	1346.91	1310.98	930.796	1256.37	1139.52	208.51	185.503	188.388	207.773	215.129	225.941
Ta.10295.1.S1_at	Os01g45274.2	carbonic anhydrase, chloroplast precursor, putative, expressed	Carbonic anhydrase-like [Oryza sativa (japonica cultivar-group)]	TA55283_4565	n	n	n	n	down	treated	1689.74	1238.75	1053.52	820.049	1073.68	212.764	152.689	334.453	102.827	15.4572	63.8065	37.8729
Ta.10295.1.S1_x_at	Os01g45274.2	carbonic anhydrase, chloroplast precursor, putative, expressed	Carbonic anhydrase-like [Oryza sativa (japonica cultivar-group)]	TA55283_4565	n	n	n	n	down	untreated	1384.49	1197.35	1077.86	787.684	1095.26	1006.45	233.589	127.341	111.472	157.606	224.787	211.799
Ta.10295.1.S1_x_at	Os01g45274.2	carbonic anhydrase, chloroplast precursor, putative, expressed	Carbonic anhydrase-like [Oryza sativa (japonica cultivar-group)]	TA55283_4565	n	n	n	n	down	treated	1430.5	1084.14	900.189	711.053	905.091	195.702	109.423	336.117	95.344	18.1432	56.1816	38.2266
Ta.10296.1.S1_a_at	Os06g45850.3	cysteine-type peptidase, putative, expressed	Hypothetical protein [Arabidopsis thaliana (Mouse-ear cress)]	TA85716_4565	n	n	n	down	n	untreated	129.319	89.5618	235.237	255.537	181.342	123.629	16.9279	24.367	11.3329	29.9969	33.0064	21.631
Ta.10296.1.S1_a_at	Os06g45850.3	cysteine-type peptidase, putative, expressed	Hypothetical protein [Arabidopsis thaliana (Mouse-ear cress)]	TA85716_4565	n	n	n	down	n	treated	117.898	110.516	180.286	152.612	80.5749	147.294	11.9414	51.1254	10.7461	10.1741	7.87072	16.0638
Ta.10299.1.S1_at	Os01g16146.1	phenazine biosynthesis protein, putative, expressed	Putative MAWD binding protein [Oryza sativa (japonica cultivar-group)]	TA81522_4565	n	n	n	n	up	untreated	128.723	150.373	266.947	258.245	196.918	166.213	7.26075	9.24895	29.1103	6.43067	23.6815	39.0157
Ta.10299.1.S1_at	Os01g16146.1	phenazine biosynthesis protein, putative, expressed	Putative MAWD binding protein [Oryza sativa (japonica cultivar-group)]	TA81522_4565	n	n	n	n	up	treated	104.802	228.261	286.766	357.803	381.162	470.658	10.6008	170.646	10.3895	42.1923	17.2916	12.7877
Ta.103.1.S1_at	Os03g55540.1	zinc-finger protein 1, putative, expressed	Zinc-finger protein 1 [Triticum aestivum (Wheat)]	TA77580_4565	n	n	up	up	n	untreated	753.931	732.743	397.809	123.25	363.223	875.35	233.676	294.211	48.015	82.9255	133.086	450.156
Ta.103.1.S1_at	Os03g55540.1	zinc-finger protein 1, putative, expressed	Zinc-finger protein 1 [Triticum aestivum (Wheat)]	TA77580_4565	n	n	up	up	n	treated	750.705	1630.89	1602.31	1923.35	4047.79	1254.64	332.314	747.63	817.346	187.662	278.761	304.299
Ta.10304.1.S1_a_at	Os03g57500.1	CIC7E11, putative, expressed	Putative RING zinc finger protein [Oryza sativa (japonica cultivar-group)]	TA76735_4565	n	n	up	up	n	untreated	1548.36	668.681	645.52	530.431	551.35	695.72	12.0945	24.6922	56.4182	28.5139	86.3846	164.093
Ta.10304.1.S1_a_at	Os03g57500.1	CIC7E11, putative, expressed	Putative RING zinc finger protein [Oryza sativa (japonica cultivar-group)]	TA76735_4565	n	n	up	up	n	treated	1398	918.73	882.042	1220.91	1955.53	1288.26	28.4905	314.948	44.6842	88.359	139.287	62.2335
Ta.10307.1.A1_at	Os11g03780.1	alpha-N-arabinofuranosidase 1 precursor, putative, expressed	Arabinoxylan arabinofuranohydrolase isoenzyme AXAH-II, putative [Oryza sativa (japonica cultivar-group)]	TA73061_4565	n	n	up	up	up	untreated	23.6457	27.6395	23.6788	29.7365	27.7656	27.7456	0.610471	3.16323	2.89658	3.89809	2.18303	4.76191
Ta.10307.1.A1_at	Os11g03780.1	alpha-N-arabinofuranosidase 1 precursor, putative, expressed	Arabinoxylan arabinofuranohydrolase isoenzyme AXAH-II, putative [Oryza sativa (japonica cultivar-group)]	TA73061_4565	n	n	up	up	up	treated	24.0803	56.2785	35.1665	121.569	163.343	85.0394	2.58772	62.5923	9.39955	7.96845	36.2465	9.34531
Ta.10307.2.S1_at	Os11g03780.1	alpha-N-arabinofuranosidase 1 precursor, putative, expressed	Arabinoxylan arabinofuranohydrolase isoenzyme AXAH-II, putative [Oryza sativa (japonica cultivar-group)]	TA73061_4565	n	n	n	up	n	untreated	33.256	35.764	31.837	32.1104	33.9639	34.1861	3.00339	3.01177	4.10519	1.97236	2.63269	4.22437
Ta.10307.2.S1_at	Os11g03780.1	alpha-N-arabinofuranosidase 1 precursor, putative, expressed	Arabinoxylan arabinofuranohydrolase isoenzyme AXAH-II, putative [Oryza sativa (japonica cultivar-group)]	TA73061_4565	n	n	n	up	n	treated	35.3502	35.6318	39.947	59.5155	77.0162	53.1292	3.98209	11.4847	3.4534	14.6134	5.33506	6.11571
Ta.10308.1.S1_at	Os06g39260.1	solute carrier family 35 member B1, putative, expressed	Putative UDP-galactose/UDP-glucose transporter [Oryza sativa (japonica cultivar-group)]	TA74637_4565	n	up	up	up	n	untreated	883.355	3557.09	1398.24	1089.26	1429.56	1849.18	197.197	106.329	229.691	310.522	289.322	965.025
Ta.10308.1.S1_at	Os06g39260.1	solute carrier family 35 member B1, putative, expressed	Putative UDP-galactose/UDP-glucose transporter [Oryza sativa (japonica cultivar-group)]	TA74637_4565	n	up	up	up	n	treated	787.124	5169.93	6043.66	6840.44	4779.06	1094.96	63.7517	1734.91	488.862	419.224	350.938	340.416
Ta.10308.2.S1_at	Os06g39260.1	solute carrier family 35 member B1, putative, expressed	Putative UDP-galactose/UDP-glucose transporter [Oryza sativa (japonica cultivar-group)]	TA74637_4565	n	n	n	up	n	untreated	18.1636	34.0715	26.4412	20.1933	21.6694	24.5786	3.69205	5.03193	1.87263	5.33998	1.9203	5.43447
Ta.10308.2.S1_at	Os06g39260.1	solute carrier family 35 member B1, putative, expressed	Putative UDP-galactose/UDP-glucose transporter [Oryza sativa (japonica cultivar-group)]	TA74637_4565	n	n	n	up	n	treated	20.1357	39.145	48.0457	51.6612	55.6109	17.5137	6.32832	8.01116	11.9837	17.0668	7.32022	1.94071
Ta.10308.3.S1_a_at	Os06g39260.1	solute carrier family 35 member B1, putative, expressed	Putative UDP-galactose/UDP-glucose transporter [Oryza sativa (japonica cultivar-group)]	TA74637_4565	n	up	up	up	n	untreated	500.483	2119.27	810.535	634.956	777.47	1063.48	112.265	89.347	141.188	152.986	159.269	549.351
Ta.10308.3.S1_a_at	Os06g39260.1	solute carrier family 35 member B1, putative, expressed	Putative UDP-galactose/UDP-glucose transporter [Oryza sativa (japonica cultivar-group)]	TA74637_4565	n	up	up	up	n	treated	447.592	2998.85	3537.59	4174.36	2873.04	690.058	49.4758	978.91	193.492	201.271	275.357	205.949
Ta.10308.3.S1_x_at	Os06g39260.1	solute carrier family 35 member B1, putative, expressed	Putative UDP-galactose/UDP-glucose transporter [Oryza sativa (japonica cultivar-group)]	CA737264	n	up	up	up	n	untreated	173.128	554.12	238.307	202.531	230.268	311.458	38.502	46.6191	17.0256	33.5975	42.1367	151.048
Ta.10308.3.S1_x_at	Os06g39260.1	solute carrier family 35 member B1, putative, expressed	Putative UDP-galactose/UDP-glucose transporter [Oryza sativa (japonica cultivar-group)]	CA737264	n	up	up	up	n	treated	163.472	798.731	933.726	1107.29	796.135	231.202	13.9747	261.136	20.9937	37.9224	81.6557	51.2428
Ta.10310.3.S1_at	Os11g06720.1	abscisic stress ripening protein 2, putative, expressed	NA	TA61985_4565	n	n	down	down	down	untreated	708.068	356.779	546.414	954.122	1427.22	886.055	102.208	6.51822	46.1669	169.251	66.8915	320.035
Ta.10310.3.S1_at	Os11g06720.1	abscisic stress ripening protein 2, putative, expressed	NA	TA61985_4565	n	n	down	down	down	treated	658.444	230.807	320.38	379.856	62.4614	46.8065	154.811	107.599	108.718	16.0049	16.7042	14.9227
Ta.10314.1.S1_at	Os04g49490.1	catalytic/ protein phosphatase type 2C, putative, expressed	Hypothetical protein OSJNBa0078D06.30 [Oryza sativa (japonica cultivar-group)]	BJ250259	n	n	n	up	n	untreated	540.752	426.531	143.469	151.295	284.393	281.111	94.4746	68.2246	23.7786	27.5889	56.4798	50.4562
Ta.10314.1.S1_at	Os04g49490.1	catalytic/ protein phosphatase type 2C, putative, expressed	Hypothetical protein OSJNBa0078D06.30 [Oryza sativa (japonica cultivar-group)]	BJ250259	n	n	n	up	n	treated	541.287	304.6	184.321	200.171	737.888	432.359	85.5594	111.121	52.4548	47.5302	44.7176	32.252
Ta.10316.1.S1_a_at	Os03g01990.1	lysM domain containing protein, expressed	Hypothetical protein OSJNBb0043C10.2 [Oryza sativa (japonica cultivar-group)]	TA86535_4565	n	n	n	up	n	untreated	120.422	230.267	67.0119	65.1119	67.3106	80.1614	23.6848	75.8461	8.44825	5.04107	13.3209	16.3599
Ta.10316.1.S1_a_at	Os03g01990.1	lysM domain containing protein, expressed	Hypothetical protein OSJNBb0043C10.2 [Oryza sativa (japonica cultivar-group)]	TA86535_4565	n	n	n	up	n	treated	102.382	216.783	87.4679	77.0968	235.296	137.887	13.9074	143.726	10.51	5.11302	26.6909	17.5559
Ta.10316.1.S1_at	Os03g01990.1	lysM domain containing protein, expressed	Hypothetical protein OSJNBb0043C10.2 [Oryza sativa (japonica cultivar-group)]	TA86535_4565	n	n	up	up	up	untreated	155.81	317.524	47.0609	42.6698	59.7047	57.5668	41.6263	130.336	5.43668	6.50901	7.27969	10.3547
Ta.10316.1.S1_at	Os03g01990.1	lysM domain containing protein, expressed	Hypothetical protein OSJNBb0043C10.2 [Oryza sativa (japonica cultivar-group)]	TA86535_4565	n	n	up	up	up	treated	152.732	330.224	79.6036	94.6858	493.039	209.04	52.178	222.167	7.44824	10.4025	25.2718	41.2568
Ta.10318.1.S1_at	Os11g39650.1	sec12-like protein 2, putative, expressed	Protein transport protein SEC12p, putative [Oryza sativa (japonica cultivar-group)]	CK200858	n	n	n	up	n	untreated	275.409	378.978	238.343	256.175	261.263	213.445	48.2395	160.957	38.3801	29.3177	25.0753	55.9126
Ta.10318.1.S1_at	Os11g39650.1	sec12-like protein 2, putative, expressed	Protein transport protein SEC12p, putative [Oryza sativa (japonica cultivar-group)]	CK200858	n	n	n	up	n	treated	263.341	419.943	279.763	485.036	861.575	460.539	9.42383	47.1631	30.4624	79.414	66.4197	41.2743
Ta.10321.1.S1_at	Os07g33850.1	septum-promoting GTP-binding protein 1, putative, expressed	Putative Septum-promoting GTP-binding protein 1 [Oryza sativa (japonica cultivar-group)]	TA108788_4565	n	up	up	up	n	untreated	262.58	228.981	81.6939	62.3362	170.104	150.768	56.9766	7.71125	1.28241	12.8061	13.5176	11.9364
Ta.10321.1.S1_at	Os07g33850.1	septum-promoting GTP-binding protein 1, putative, expressed	Putative Septum-promoting GTP-binding protein 1 [Oryza sativa (japonica cultivar-group)]	TA108788_4565	n	up	up	up	n	treated	245.348	273.212	184.08	165.371	364.122	224.422	58.346	117.602	25.2814	28.5332	20.3342	10.7987
Ta.10325.1.S1_at	Os02g11960.1	ATATH5, putative	Putative ABC transporter [Oryza sativa (japonica cultivar-group)]	TA100802_4565	n	n	up	n	n	untreated	211.57	101.814	104.204	101.255	227.016	312.078	43.6197	11.3554	17.4237	16.6194	33.3368	100.241
Ta.10325.1.S1_at	Os02g11960.1	ATATH5, putative	Putative ABC transporter [Oryza sativa (japonica cultivar-group)]	TA100802_4565	n	n	up	n	n	treated	208.43	106.539	104.296	217.643	227.879	173.475	26.3142	85.3531	13.8915	10.9184	37.6472	33.386
Ta.10329.15.S1_at	Os09g38020.1	histone H4, putative, expressed	Homolog of Homo sapiens "Histone 1, H2ai [Takifugu rubripes]	TA56310_4565	n	n	down	down	n	untreated	217.163	76.5442	100.478	321.609	320.059	109.269	48.2958	0.178122	7.64954	31.016	161.528	31.1128
Ta.10329.15.S1_at	Os09g38020.1	histone H4, putative, expressed	Homolog of Homo sapiens "Histone 1, H2ai [Takifugu rubripes]	TA56310_4565	n	n	down	down	n	treated	201.004	89.1963	71.6549	142.675	86.119	89.4699	53.3324	28.3868	3.33969	21.8923	4.91636	1.86554
Ta.10329.28.S1_at	NA	NA	Histone H4 [Petunia hybrida (Petunia)]	BJ312006	n	n	down	down	n	untreated	1587.17	659.423	1445.47	2483.96	3005.51	1125.08	292.035	43.6751	276.312	409.61	1109.84	290.288
Ta.10329.28.S1_at	NA	NA	Histone H4 [Petunia hybrida (Petunia)]	BJ312006	n	n	down	down	n	treated	1343.34	707.666	897.663	971.184	424.405	614.052	161.8	177.584	96.3572	53.0272	85.538	82.7906
Ta.10329.28.S1_x_at	NA	NA	Histone H4 [Petunia hybrida (Petunia)]	BJ312006	n	n	down	down	n	untreated	2460.74	973.581	2231.93	3606.44	4393.72	1746.25	473.719	92.3268	413.473	496.834	1577.75	472.139
Ta.10329.28.S1_x_at	NA	NA	Histone H4 [Petunia hybrida (Petunia)]	BJ312006	n	n	down	down	n	treated	2169.51	994.707	1386.74	1443.54	493.122	792.168	232.855	277.181	98.3414	147.606	139.398	142.644
Ta.10329.30.S1_x_at	Os09g38020.1	histone H4, putative, expressed	Homolog of Homo sapiens "Histone 1, H2ai [Takifugu rubripes]	TA60860_4565	n	n	up	up	n	untreated	58.3771	52.4683	56.8049	82.9266	66.9979	63.2354	7.00441	10.9154	9.05438	9.3395	11.0186	11.5082
Ta.10329.30.S1_x_at	Os09g38020.1	histone H4, putative, expressed	Homolog of Homo sapiens "Histone 1, H2ai [Takifugu rubripes]	TA60860_4565	n	n	up	up	n	treated	58.8408	74.2345	78.3373	186.701	157.505	99.5126	8.20299	50.4616	11.8451	50.6847	30.2275	33.9871
Ta.10329.34.S1_x_at	Os09g38020.1	histone H4, putative, expressed	Homolog of Homo sapiens "Histone 1, H2ai [Takifugu rubripes]	TA60840_4565	n	n	n	down	n	untreated	494.713	541.46	342.096	528.118	939.407	484.692	71.5122	90.7625	77.8078	130.736	201.236	239.097
Ta.10329.34.S1_x_at	Os09g38020.1	histone H4, putative, expressed	Homolog of Homo sapiens "Histone 1, H2ai [Takifugu rubripes]	TA60840_4565	n	n	n	down	n	treated	497.197	354.702	252.564	303.283	344.844	255.544	83.4324	83.2635	17.1806	47.1173	21.6928	25.9015
Ta.10329.39.S1_at	Os09g38020.1	histone H4, putative, expressed	Homolog of Homo sapiens "Histone 1, H2ai [Takifugu rubripes]	TA62265_4565	n	n	n	n	up	untreated	781.694	802.136	1634.95	1773.97	1413.3	676.884	173.449	16.1944	293.257	344.722	264.045	66.698
Ta.10329.39.S1_at	Os09g38020.1	histone H4, putative, expressed	Homolog of Homo sapiens "Histone 1, H2ai [Takifugu rubripes]	TA62265_4565	n	n	n	n	up	treated	616.937	905.72	1317.45	1194.54	1770.87	1367.79	73.043	237.184	185.958	89.3601	161.546	202.001
Ta.10329.40.S1_x_at	Os09g38020.1	histone H4, putative, expressed	Homolog of Homo sapiens "Histone 1, H2ai [Takifugu rubripes]	TA60858_4565	n	n	down	n	n	untreated	45.7588	28.9878	107.891	139.647	130.749	46.6889	14.3416	2.08643	13.9402	41.9703	114.129	8.62873
Ta.10329.40.S1_x_at	Os09g38020.1	histone H4, putative, expressed	Homolog of Homo sapiens "Histone 1, H2ai [Takifugu rubripes]	TA60858_4565	n	n	down	n	n	treated	33.7957	42.3718	70.6214	59.9548	41.1597	33.943	9.93667	13.2256	24.6962	10.9329	6.63709	6.5031
Ta.10706.1.S1_at	Os12g40340.1	EXS, C-terminal, putative, expressed	Hypothetical protein [Oryza sativa (japonica cultivar-group)]	TA86340_4565	n	up	up	up	n	untreated	157.481	343.631	178.419	188.799	193.155	162.687	1.3371	86.0103	11.148	11.6241	8.26041	12.896
Ta.10706.1.S1_at	Os12g40340.1	EXS, C-terminal, putative, expressed	Hypothetical protein [Oryza sativa (japonica cultivar-group)]	TA86340_4565	n	up	up	up	n	treated	138.221	440.023	367.039	410.45	622.513	338.85	15.1836	17.0676	1.7992	30.4194	43.1319	58.4853
Ta.10706.1.S1_x_at	Os12g40340.1	EXS, C-terminal, putative, expressed	Hypothetical protein [Oryza sativa (japonica cultivar-group)]	TA86340_4565	n	n	up	up	up	untreated	272.64	617.912	304.359	335.411	333.139	268.938	30.7684	161.253	23.9673	10.7493	19.3171	20.3475
Ta.10706.1.S1_x_at	Os12g40340.1	EXS, C-terminal, putative, expressed	Hypothetical protein [Oryza sativa (japonica cultivar-group)]	TA86340_4565	n	n	up	up	up	treated	257.13	784.872	601.438	717.178	1014.85	594.898	25.2501	46.3024	11.7477	12.6635	26.252	91.5085
Ta.10712.1.S1_a_at	Os03g18160.1	tricarboxylate transport protein, mitochondrial precursor, putative, expressed	Hypothetical protein [Arabidopsis thaliana (Mouse-ear cress)]	TA84477_4565	n	n	n	down	down	untreated	593.723	154.77	58.7964	88.8637	431.185	311.592	54.492	29.1281	8.31312	25.0397	39.1764	60.6973
Ta.10712.1.S1_a_at	Os03g18160.1	tricarboxylate transport protein, mitochondrial precursor, putative, expressed	Hypothetical protein [Arabidopsis thaliana (Mouse-ear cress)]	TA84477_4565	n	n	n	down	down	treated	586.911	145.057	62.0295	61.6409	205.446	65.7702	47.2462	75.4867	11.9636	8.47268	5.51276	11.0901
Ta.10712.1.S1_at	Os03g18160.1	tricarboxylate transport protein, mitochondrial precursor, putative, expressed	Hypothetical protein [Arabidopsis thaliana (Mouse-ear cress)]	TA84477_4565	n	n	n	n	down	untreated	387.977	191.123	151.495	193.158	307.751	301.06	47.3597	2.0825	2.19002	25.8299	28.053	67.4983
Ta.10712.1.S1_at	Os03g18160.1	tricarboxylate transport protein, mitochondrial precursor, putative, expressed	Hypothetical protein [Arabidopsis thaliana (Mouse-ear cress)]	TA84477_4565	n	n	n	n	down	treated	411.853	174.081	153.863	162.947	181.215	145.137	15.6336	31.8293	7.18329	30.4138	17.2541	6.39722
Ta.10712.2.S1_a_at	Os03g18160.1	tricarboxylate transport protein, mitochondrial precursor, putative, expressed	Hypothetical protein [Arabidopsis thaliana (Mouse-ear cress)]	CD454809	n	n	n	down	down	untreated	1070.61	206.095	64.0988	109.143	873.159	578.724	94.5595	28.9671	7.26484	61.1031	41.5152	74.451
Ta.10712.2.S1_a_at	Os03g18160.1	tricarboxylate transport protein, mitochondrial precursor, putative, expressed	Hypothetical protein [Arabidopsis thaliana (Mouse-ear cress)]	CD454809	n	n	n	down	down	treated	1031.55	203.69	58.2281	78.008	370.797	109.684	60.443	105.364	10.2533	9.977	45.6478	19.6981
Ta.10712.2.S1_x_at	Os03g18160.1	tricarboxylate transport protein, mitochondrial precursor, putative, expressed	Hypothetical protein [Arabidopsis thaliana (Mouse-ear cress)]	CD454809	n	n	n	n	down	untreated	702.178	163.345	63.0374	85.4872	578.618	364.503	17.4231	4.51857	3.64417	23.681	71.6388	22.5236
Ta.10712.2.S1_x_at	Os03g18160.1	tricarboxylate transport protein, mitochondrial precursor, putative, expressed	Hypothetical protein [Arabidopsis thaliana (Mouse-ear cress)]	CD454809	n	n	n	n	down	treated	681.208	160.804	67.6606	65.9862	305.511	98.1439	63.4155	85.0712	10.9681	9.5328	9.68878	29.8464
Ta.10712.3.S1_x_at	Os03g18160.1	tricarboxylate transport protein, mitochondrial precursor, putative, expressed	Hypothetical protein [Arabidopsis thaliana (Mouse-ear cress)]	TA84476_4565	n	n	n	down	down	untreated	1341.37	348.588	111.141	171.969	1006.74	697.117	26.6285	40.3013	7.94181	53.6218	102.924	158.569
Ta.10712.3.S1_x_at	Os03g18160.1	tricarboxylate transport protein, mitochondrial precursor, putative, expressed	Hypothetical protein [Arabidopsis thaliana (Mouse-ear cress)]	TA84476_4565	n	n	n	down	down	treated	1220.96	291.962	124.331	142.554	442.569	144.65	87.2159	142.849	26.2734	15.9066	19.1066	19.7199
Ta.10715.1.S1_at	Os03g56869.1	ribose-5-phosphate isomerase, putative, expressed	Hypothetical protein OSJNBa0091J19.22 [Oryza sativa (japonica cultivar-group)]	TA84505_4565	n	n	down	down	down	untreated	2216.01	1196.17	849.722	1161.38	1305.41	1213.35	238.178	142.083	103.233	174.662	8.4627	368.49
Ta.10715.1.S1_at	Os03g56869.1	ribose-5-phosphate isomerase, putative, expressed	Hypothetical protein OSJNBa0091J19.22 [Oryza sativa (japonica cultivar-group)]	TA84505_4565	n	n	down	down	down	treated	2422.13	749.966	494.498	443.856	30.4155	27.1117	252.897	319.088	191.514	65.4043	9.24685	13.4885
Ta.10723.1.A1_at	Os06g10880.2	bZIP transcription factor family protein, expressed	Putative bZIP transcription factor [Oryza sativa (japonica cultivar-group)]	TA105268_4565	n	n	n	down	n	untreated	58.4529	143.042	50.3204	42.7221	118.826	79.0748	3.83081	48.1246	10.047	8.8478	10.9355	21.8279
Ta.10723.1.A1_at	Os06g10880.2	bZIP transcription factor family protein, expressed	Putative bZIP transcription factor [Oryza sativa (japonica cultivar-group)]	TA105268_4565	n	n	n	down	n	treated	66.4286	122.462	55.2928	40.76	50.4446	43.1129	6.91061	72.6684	5.95973	4.26929	5.40679	5.86216
Ta.11414.1.S1_at	Os02g47880.1	kinesin light chain, putative, expressed	Similar to A. thaliana protein BAB01483 similar [Hordeum vulgare var. distichum (Two-rowed barley)]	TA77648_4565	n	n	n	up	n	untreated	249.953	408.209	337.187	316.666	225.036	227.573	31.2199	37.9734	40.9008	16.7488	46.5723	24.7534
Ta.11414.1.S1_at	Os02g47880.1	kinesin light chain, putative, expressed	Similar to A. thaliana protein BAB01483 similar [Hordeum vulgare var. distichum (Two-rowed barley)]	TA77648_4565	n	n	n	up	n	treated	225.639	481.092	449.164	412.931	698.831	379.821	12.0424	70.1843	50.6345	12.2244	47.8502	19.4669
Ta.11414.3.S1_a_at	Os02g47880.1	kinesin light chain, putative, expressed	Similar to A. thaliana protein BAB01483 similar [Hordeum vulgare var. distichum (Two-rowed barley)]	TA77648_4565	n	n	n	up	n	untreated	194.24	286.82	242.121	225.733	165.21	164.897	21.524	22.2594	17.9797	27.0559	5.61506	12.1926
Ta.11414.3.S1_a_at	Os02g47880.1	kinesin light chain, putative, expressed	Similar to A. thaliana protein BAB01483 similar [Hordeum vulgare var. distichum (Two-rowed barley)]	TA77648_4565	n	n	n	up	n	treated	181.493	342.733	331.588	277.783	472.102	242.579	17.2863	79.035	46.1435	26.407	58.9681	18.5642
Ta.1142.1.S1_x_at	Os05g01530.1	expressed protein	NA	TA72717_4565	n	n	down	down	down	untreated	5639.57	4469.43	5000.11	4016.16	5515.49	5102.53	528.048	693.452	649.503	492.315	706.16	746.145
Ta.1142.1.S1_x_at	Os05g01530.1	expressed protein	NA	TA72717_4565	n	n	down	down	down	treated	5715.5	3196.56	3173.93	1929.98	349.256	834.915	520.916	1142.66	317.917	52.7074	97.8363	199.929
Ta.1142.3.S1_at	Os05g01530.1	expressed protein	NA	BJ250802	n	n	n	down	down	untreated	428.608	379.061	473.545	402.907	485.159	499.616	35.2549	23.3565	84.9919	26.6223	20.2864	30.7725
Ta.1142.3.S1_at	Os05g01530.1	expressed protein	NA	BJ250802	n	n	n	down	down	treated	456.296	305.092	314.413	254.583	186.864	238.575	45.4221	55.4521	34.8969	14.2872	14.8509	32.8672
Ta.11421.1.A1_at	Os01g16146.1	phenazine biosynthesis protein, putative, expressed	Putative MAWD binding protein [Oryza sativa (japonica cultivar-group)]	BQ170075	n	n	n	up	up	untreated	23.5753	24.5922	27.609	31.4006	25.0984	23.8005	3.93356	2.08183	3.86398	0.353903	3.83143	3.02102
Ta.11421.1.A1_at	Os01g16146.1	phenazine biosynthesis protein, putative, expressed	Putative MAWD binding protein [Oryza sativa (japonica cultivar-group)]	BQ170075	n	n	n	up	up	treated	25.1361	30.4354	36.4145	36.162	102.342	55.2906	0.982406	10.6167	3.63152	2.44517	11.8718	0.622249
Ta.11425.1.S1_s_at	Os09g30160.1	protein binding protein, putative, expressed	Zinc finger protein family-like [Oryza sativa (japonica cultivar-group)]	TA50819_4565	n	n	n	down	n	untreated	1977.23	1957.66	2191.99	3037.54	2260.92	2281.79	215.92	672.154	402.71	562.603	370.952	271.752
Ta.11425.1.S1_s_at	Os09g30160.1	protein binding protein, putative, expressed	Zinc finger protein family-like [Oryza sativa (japonica cultivar-group)]	TA50819_4565	n	n	n	down	n	treated	1871.93	1548.51	1564.82	1687.94	1006.74	1996.45	208.471	231.462	239.343	337.737	72.724	320.582
Ta.1143.1.S1_at	Os02g58020.1	protein GCN20, putative, expressed	Putative non-transporter ABC protein AbcF1 [Oryza sativa (japonica cultivar-group)]	TA61915_4565	n	n	n	down	n	untreated	702.423	531.035	588.51	582.994	686.211	649.599	13.009	29.39	33.9023	30.1255	43.3808	62.4554
Ta.1143.1.S1_at	Os02g58020.1	protein GCN20, putative, expressed	Putative non-transporter ABC protein AbcF1 [Oryza sativa (japonica cultivar-group)]	TA61915_4565	n	n	n	down	n	treated	670.498	501.222	498.508	512.486	306.721	392.593	55.4815	37.0721	45.0861	15.8054	15.0904	0.448226
Ta.11438.1.S1_s_at	Os08g40430.1	PDE191, putative, expressed	Hypothetical protein P0686C03.126 [Oryza sativa (japonica cultivar-group)]	CK159996	n	n	n	down	n	untreated	44.2296	31.0195	62.8003	88.4941	56.1441	133.944	12.6442	5.55582	3.87365	6.69571	8.25526	66.5605
Ta.11438.1.S1_s_at	Os08g40430.1	PDE191, putative, expressed	Hypothetical protein P0686C03.126 [Oryza sativa (japonica cultivar-group)]	CK159996	n	n	n	down	n	treated	44.0326	40.0122	43.9523	56.4263	20.2155	39.5397	8.13954	17.5451	2.32013	12.4981	2.04775	5.14346
Ta.11440.1.A1_at	Os12g07160.1	viral A-type inclusion protein repeat containing protein, expressed	Coiled-coil protein [Oryza sativa (japonica cultivar-group)]	TA90419_4565	n	n	n	down	n	untreated	44.4749	48	45.3478	46.667	68.0239	54.0872	1.17597	8.86034	3.91105	4.51567	8.84178	5.01225
Ta.11440.1.A1_at	Os12g07160.1	viral A-type inclusion protein repeat containing protein, expressed	Coiled-coil protein [Oryza sativa (japonica cultivar-group)]	TA90419_4565	n	n	n	down	n	treated	51.2682	33.7742	35.392	36.8164	28.4913	31.388	5.74463	7.73613	1.61367	6.17225	3.80618	0.88132
Ta.11441.1.S1_a_at	Os10g34030.1	zinc finger, C3HC4 type family protein, expressed	Expressed protein [Arabidopsis thaliana (Mouse-ear cress)]	CA608026	n	n	down	down	down	untreated	1639.44	2543.94	2943.13	2404.1	1233.02	1452.83	111.347	699.85	478.757	403.708	238.913	376.584
Ta.11441.1.S1_a_at	Os10g34030.1	zinc finger, C3HC4 type family protein, expressed	Expressed protein [Arabidopsis thaliana (Mouse-ear cress)]	CA608026	n	n	down	down	down	treated	1782.77	2137.21	1906.61	1065.76	407.944	712.43	185.506	934.652	113.999	18.4534	10.1787	92.4593
Ta.11443.1.S1_at	Os12g10320.1	plant-specific domain TIGR01627 family protein, expressed	Hypothetical protein [Oryza sativa (japonica cultivar-group)]	TA95306_4565	n	n	n	up	n	untreated	58.444	129.416	57.6162	82.1926	76.9688	109.192	11.9164	16.5798	11.7598	38.582	7.78079	37.1045
Ta.11443.1.S1_at	Os12g10320.1	plant-specific domain TIGR01627 family protein, expressed	Hypothetical protein [Oryza sativa (japonica cultivar-group)]	TA95306_4565	n	n	n	up	n	treated	49.0195	133.007	56.4004	119.027	167.513	248.929	9.77789	26.4092	21.9378	11.3985	24.0419	40.0525
Ta.1145.1.A1_at	Os10g37260.1	transferase, transferring glycosyl groups, putative, expressed	Expressed protein [Oryza sativa (japonica cultivar-group)]	TA99764_4565	n	n	down	down	down	untreated	355.543	464.212	149.461	193.954	739.936	507.056	36.0486	26.4143	44.002	39.8878	98.5421	165.67
Ta.1145.1.A1_at	Os10g37260.1	transferase, transferring glycosyl groups, putative, expressed	Expressed protein [Oryza sativa (japonica cultivar-group)]	TA99764_4565	n	n	down	down	down	treated	344.313	217.163	66.1786	79.4988	46.4243	78.2169	36.7036	140.213	6.67059	9.31362	9.00406	22.5233
Ta.11451.1.A1_a_at	Os12g06200.1	transcription factor E2F2, putative, expressed	NA	TA78490_4565	n	n	n	down	n	untreated	37.9776	38.0538	22.1364	31.9369	35.0195	26.4422	7.76323	9.06447	0.650103	3.01199	2.13124	4.02157
Ta.11451.1.A1_a_at	Os12g06200.1	transcription factor E2F2, putative, expressed	NA	TA78490_4565	n	n	n	down	n	treated	31.2636	36.1303	19.8456	26.2057	17.3184	20.0063	2.58127	14.5517	1.31518	1.17986	2.6484	0.674385
Ta.11463.1.S1_at	Os03g48480.1	acyl-CoA thioesterase/ catalytic/ hydrolase, acting on ester bonds, putative, expressed	Putative thioesterase family protein [Oryza sativa (japonica cultivar-group)]	BQ170155	n	n	n	up	up	untreated	207.676	158.599	184.255	218.469	217.582	242.9	13.0412	7.90395	10.7697	30.796	38.9721	31.8845
Ta.11463.1.S1_at	Os03g48480.1	acyl-CoA thioesterase/ catalytic/ hydrolase, acting on ester bonds, putative, expressed	Putative thioesterase family protein [Oryza sativa (japonica cultivar-group)]	BQ170155	n	n	n	up	up	treated	189.407	210.758	199.758	315.034	811.245	1136.63	20.9356	101.895	5.5731	15.5779	47.0336	26.2271
Ta.11463.2.S1_at	Os03g48480.1	acyl-CoA thioesterase/ catalytic/ hydrolase, acting on ester bonds, putative, expressed	Putative thioesterase family protein [Oryza sativa (japonica cultivar-group)]	BQ166989	n	n	n	up	up	untreated	190.539	231.729	459.49	508.083	359.398	296.439	41.145	28.2852	64.6602	0.994159	117.747	49.0368
Ta.11463.2.S1_at	Os03g48480.1	acyl-CoA thioesterase/ catalytic/ hydrolase, acting on ester bonds, putative, expressed	Putative thioesterase family protein [Oryza sativa (japonica cultivar-group)]	BQ166989	n	n	n	up	up	treated	166.072	499.263	602.618	916.88	882.012	1540.91	5.07299	377.22	26.6841	45.2487	28.3343	37.7913
Ta.1147.1.A1_at	Os04g45600.1	expressed protein	OSJNBa0091D06.25 protein [Oryza sativa (Rice)]	TA79140_4565	n	n	down	down	down	untreated	2145.42	1033.44	1191.62	1473.03	1961.87	1763.28	195.969	128.702	55.2696	279.691	32.2261	515.851
Ta.1147.1.A1_at	Os04g45600.1	expressed protein	OSJNBa0091D06.25 protein [Oryza sativa (Rice)]	TA79140_4565	n	n	down	down	down	treated	2475.2	575.815	702.575	622.629	44.1842	206.674	220.049	63.9586	248.413	115.252	17.6281	61.5056
Ta.1147.1.A1_x_at	Os04g45600.1	expressed protein	OSJNBa0091D06.25 protein [Oryza sativa (Rice)]	TA79140_4565	n	n	down	down	down	untreated	2240.82	1036.13	1210.05	1443.23	1983.94	1724.84	221.906	130.495	60.1616	227.373	35.3561	487.208
Ta.1147.1.A1_x_at	Os04g45600.1	expressed protein	OSJNBa0091D06.25 protein [Oryza sativa (Rice)]	TA79140_4565	n	n	down	down	down	treated	2453.63	581.73	678.246	630.079	29.234	201.969	214.448	72.0716	214.148	114.641	12.9652	59.1491
Ta.1147.2.S1_a_at	Os04g45600.1	expressed protein	OSJNBa0091D06.25 protein [Oryza sativa (Rice)]	TA79139_4565	n	n	down	down	down	untreated	10012	5631.06	6609.45	7640.42	8396.65	7842.55	1141.57	459.689	378.113	1334.96	349.206	2127.63
Ta.1147.2.S1_a_at	Os04g45600.1	expressed protein	OSJNBa0091D06.25 protein [Oryza sativa (Rice)]	TA79139_4565	n	n	down	down	down	treated	10678.8	3712.27	4556.84	3760.32	229.307	1120.71	955.607	521.176	1329.71	420.909	103.603	410.757
Ta.1147.2.S1_x_at	Os04g45600.1	expressed protein	OSJNBa0091D06.25 protein [Oryza sativa (Rice)]	TA79138_4565	n	n	down	down	down	untreated	5789.09	3042.78	3577.29	4150.17	4716.96	4410.35	866.789	252.467	240.37	758.421	342.953	1263.37
Ta.1147.2.S1_x_at	Os04g45600.1	expressed protein	OSJNBa0091D06.25 protein [Oryza sativa (Rice)]	TA79138_4565	n	n	down	down	down	treated	5986.39	1987.72	2419.33	1997.03	155.013	701.291	603.785	214.042	677.652	223.329	37.9318	221.073
Ta.1147.3.S1_at	Os04g45600.1	expressed protein	OSJNBa0091D06.25 protein [Oryza sativa (Rice)]	TA79139_4565	n	n	n	down	down	untreated	6580.27	4087.36	4900.17	5405.61	5836.75	5541.78	741.626	482.674	322.76	979.287	245.295	1243.25
Ta.1147.3.S1_at	Os04g45600.1	expressed protein	OSJNBa0091D06.25 protein [Oryza sativa (Rice)]	TA79139_4565	n	n	n	down	down	treated	7084.17	2881.72	3156.83	2968.08	265.918	914.884	304.64	196.662	354.068	108.524	94.1359	304.495
Ta.1147.3.S1_x_at	Os04g45600.1	expressed protein	OSJNBa0091D06.25 protein [Oryza sativa (Rice)]	TA79139_4565	n	n	down	down	down	untreated	8137.44	4583.02	5479.97	6037.73	6772.65	6437	1157.54	490.583	375.836	1091.08	199.417	1753.45
Ta.1147.3.S1_x_at	Os04g45600.1	expressed protein	OSJNBa0091D06.25 protein [Oryza sativa (Rice)]	TA79139_4565	n	n	down	down	down	treated	8540.14	3057.36	3694.17	3003.54	235.468	1003.32	670.385	361.956	924.666	289.837	95.6488	361.005
Ta.11472.1.S1_at	Os03g06340.1	XS domain containing protein, expressed	NA	TA101591_4565	n	n	n	down	n	untreated	354.535	294.89	263.687	231.216	285.477	253.422	32.4161	21.2665	10.2635	8.7081	36.62	12.4582
Ta.11472.1.S1_at	Os03g06340.1	XS domain containing protein, expressed	NA	TA101591_4565	n	n	n	down	n	treated	332.605	242.956	225.619	202.437	136.12	215.359	10.3151	30.0634	26.7376	12.5313	12.5126	0.779586
Ta.11477.1.A1_at	Os02g15160.1	F-box domain containing protein, expressed	NA	TA95293_4565	n	n	n	down	n	untreated	133.708	133.615	130.306	144.36	133.578	131.078	4.60596	19.8946	14.8014	11.9367	9.12112	5.69198
Ta.11477.1.A1_at	Os02g15160.1	F-box domain containing protein, expressed	NA	TA95293_4565	n	n	n	down	n	treated	120.639	85.1735	85.1774	91.6659	53.5945	113.046	46.1138	9.63829	9.90497	2.56714	4.07368	7.28361
Ta.11480.1.S1_at	Os04g46730.1	pollen thioesterase, putative, expressed	OSJNBa0010H02.15 protein [Oryza sativa (japonica cultivar-group)]	CA650292	n	n	n	n	down	untreated	237.829	157.219	224.918	263.2	208.822	203.569	30.2744	14.2403	10.5511	38.0996	35.0973	6.51628
Ta.11480.1.S1_at	Os04g46730.1	pollen thioesterase, putative, expressed	OSJNBa0010H02.15 protein [Oryza sativa (japonica cultivar-group)]	CA650292	n	n	n	n	down	treated	221.766	155.709	177.755	185.222	109.108	92.7924	18.3022	18.3867	14.2155	6.80226	16.434	8.07038
Ta.11488.1.S1_s_at	Os01g56330.1	protein kinase, putative, expressed	Hypothetical protein P0665A11.8 [Oryza sativa (japonica cultivar-group)]	CA643855	n	n	n	n	up	untreated	739.572	405.438	181.643	213.047	295.687	257.295	269.223	47.0457	17.7195	33.417	39.1211	28.7166
Ta.11488.1.S1_s_at	Os01g56330.1	protein kinase, putative, expressed	Hypothetical protein P0665A11.8 [Oryza sativa (japonica cultivar-group)]	CA643855	n	n	n	n	up	treated	669.538	337.82	164.86	189.378	526.558	675.348	50.0205	156.103	32.9513	46.7778	18.669	71.1103
Ta.11488.1.S1_x_at	Os01g56330.1	protein kinase, putative, expressed	Hypothetical protein P0665A11.8 [Oryza sativa (japonica cultivar-group)]	TA71376_4565	n	n	n	n	up	untreated	467.19	244.583	90.0845	119.644	181.261	135.322	173.095	38.4928	14.6946	16.4772	30.0294	8.20888
Ta.11488.1.S1_x_at	Os01g56330.1	protein kinase, putative, expressed	Hypothetical protein P0665A11.8 [Oryza sativa (japonica cultivar-group)]	TA71376_4565	n	n	n	n	up	treated	409.376	209.436	88.4763	99.3777	265.238	331.382	51.429	93.1667	17.1659	25.8689	22.0363	35.1145
Ta.11492.1.A1_at	Os05g50200.1	expressed protein	AT3g27930/K24A2_2 [Arabidopsis thaliana (Mouse-ear cress)]	TA81947_4565	n	n	n	up	up	untreated	14.9896	15.8818	14.2043	13.9931	14.428	13.9917	2.28476	3.90647	1.35292	1.81594	1.42962	1.17506
Ta.11492.1.A1_at	Os05g50200.1	expressed protein	AT3g27930/K24A2_2 [Arabidopsis thaliana (Mouse-ear cress)]	TA81947_4565	n	n	n	up	up	treated	14.1094	19.1981	14.5864	16.3989	83.0733	71.6012	2.5766	4.36434	0.853678	1.29305	17.2826	9.66644
Ta.11498.1.A1_at	Os03g49510.1	phosphatidylinositol-4-phosphate 5-kinase 1 precursor, putative, expressed	Splice isoform 2 of Q6EX42 [Oryza sativa (Rice)]	TA78721_4565	n	n	down	down	down	untreated	187.925	116.977	635.838	463.068	111.765	100.957	12.0905	13.9977	19.7303	51.5741	15.0434	12.2604
Ta.11498.1.A1_at	Os03g49510.1	phosphatidylinositol-4-phosphate 5-kinase 1 precursor, putative, expressed	Splice isoform 2 of Q6EX42 [Oryza sativa (Rice)]	TA78721_4565	n	n	down	down	down	treated	169.898	113.513	297.598	158.297	32.9285	36.7212	12.7626	42.1971	49.1995	0.327867	3.35137	2.53207
Ta.1151.1.S1_at	Os07g01800.1	cysteine proteinase EP-B 1 precursor, putative	NA	CJ616159	n	n	down	down	down	untreated	2179.53	2176.71	1962.93	2186.51	2227.96	2061.88	120.143	559.718	574.192	501.042	330.161	346.039
Ta.1151.1.S1_at	Os07g01800.1	cysteine proteinase EP-B 1 precursor, putative	NA	CJ616159	n	n	down	down	down	treated	2208.6	972.578	1008.16	642.338	68.8142	23.8977	54.5375	408.77	234.37	208.652	16.3567	2.99759
Ta.11513.1.S1_a_at	Os09g13570.1	ocs element-binding factor 1, putative, expressed	NA	TA78526_4565	n	n	n	n	down	untreated	72.0672	111.671	241.539	288.6	103.177	156.912	3.64517	11.9772	60.1296	18.0321	14.6875	32.2438
Ta.11513.1.S1_a_at	Os09g13570.1	ocs element-binding factor 1, putative, expressed	NA	TA78526_4565	n	n	n	n	down	treated	64.0675	122.933	195.871	153.186	125.405	57.1824	14.2007	24.2027	20.0067	9.33749	46.3338	3.18671
Ta.11513.1.S1_s_at	Os09g13570.1	ocs element-binding factor 1, putative, expressed	NA	TA78526_4565	n	n	n	n	down	untreated	221.701	368.166	770.003	973.853	405.185	620.318	34.7346	58.288	210.807	83.7073	14.1896	159.781
Ta.11513.1.S1_s_at	Os09g13570.1	ocs element-binding factor 1, putative, expressed	NA	TA78526_4565	n	n	n	n	down	treated	207.073	375.281	579.011	501.811	430.209	232.487	42.3106	83.1291	49.4906	13.6606	153.958	7.02025
Ta.11526.1.A1_at	Os10g37340.1	O-succinylhomoserine sulfhydrylase, putative, expressed	Rrj1 [Oryza sativa (Rice)]	BQ170281	n	n	n	up	up	untreated	52.8656	122.443	56.9149	60.7774	60.5213	57.2535	5.5228	17.5027	4.47338	19.5164	7.42163	12.6993
Ta.11526.1.A1_at	Os10g37340.1	O-succinylhomoserine sulfhydrylase, putative, expressed	Rrj1 [Oryza sativa (Rice)]	BQ170281	n	n	n	up	up	treated	53.0047	370.796	78.2121	74.5714	839.489	184.675	1.89954	322.756	15.4026	10.5816	258.2	17.3235
Ta.11530.1.S1_at	Os01g60170.1	GTP binding protein, putative, expressed	Hypothetical protein B1148D12.26 [Oryza sativa (japonica cultivar-group)]	BQ170287	n	n	n	down	n	untreated	1874.72	1025.04	631.054	556.041	1695.33	1137.67	500.915	109.422	120.848	66.1412	43.3419	111.575
Ta.11530.1.S1_at	Os01g60170.1	GTP binding protein, putative, expressed	Hypothetical protein B1148D12.26 [Oryza sativa (japonica cultivar-group)]	BQ170287	n	n	n	down	n	treated	1797.36	773.596	607.157	513.446	621.774	868.319	524.049	214.868	53.2077	29.5449	104.69	39.7604
Ta.12135.1.A1_s_at	Os05g44300.1	plant-specific domain TIGR01615 family protein, expressed	Hypothetical protein P0481E12.8-1 [Oryza sativa (japonica cultivar-group)]	TA97234_4565	n	n	down	n	n	untreated	466.717	254.609	241.993	290.802	213.579	274.943	51.0602	58.3698	28.6465	62.2158	26.9312	28.2841
Ta.12135.1.A1_s_at	Os05g44300.1	plant-specific domain TIGR01615 family protein, expressed	Hypothetical protein P0481E12.8-1 [Oryza sativa (japonica cultivar-group)]	TA97234_4565	n	n	down	n	n	treated	433.853	172.801	174.248	131.15	126.017	200.067	76.049	41.5278	28.2265	14.4918	3.39995	49.9493
Ta.12137.1.A1_at	Os02g36030.1	cytochrome P450 76C2, putative, expressed	Cyt-P450 monooxygenase [Oryza sativa (Rice)]	TA94052_4565	n	n	down	down	down	untreated	649.48	603.469	305.34	724.484	1479.98	847.644	228.309	128.941	62.1453	176.223	249.893	211.916
Ta.12137.1.A1_at	Os02g36030.1	cytochrome P450 76C2, putative, expressed	Cyt-P450 monooxygenase [Oryza sativa (Rice)]	TA94052_4565	n	n	down	down	down	treated	605.432	349.426	221.949	350.245	124.601	143.937	137.479	68.5695	59.1755	65.4327	7.17562	20.2491
Ta.12139.1.S1_at	Os10g09850.1	EF-Hand containing protein, putative, expressed	39 kDa EF-Hand containing protein [Solanum tuberosum (Potato)]	TA84947_4565	n	n	n	down	down	untreated	1123.37	2655.14	2410.42	1744.96	1663.99	989.576	88.4345	497.132	315.792	268.753	283.023	172.512
Ta.12139.1.S1_at	Os10g09850.1	EF-Hand containing protein, putative, expressed	39 kDa EF-Hand containing protein [Solanum tuberosum (Potato)]	TA84947_4565	n	n	n	down	down	treated	1213.79	2730.09	1841.52	1297.93	528.999	474.352	64.2077	1195.32	123.73	57.3137	96.4215	66.6392
Ta.12142.1.A1_at	Os02g33020.1	SOUL heme-binding protein, putative, expressed	NA	BQ171675	n	n	down	down	down	untreated	1300.24	811.825	1574.12	1433.46	1285.02	1311.76	236	135.414	27.9054	236.753	20.4236	438.807
Ta.12142.1.A1_at	Os02g33020.1	SOUL heme-binding protein, putative, expressed	NA	BQ171675	n	n	down	down	down	treated	1430.78	636.19	858.477	604.148	59.128	152.864	169.255	106.179	105.175	36.6633	22.4949	37.1753
Ta.12142.1.A1_s_at	Os02g33020.1	SOUL heme-binding protein, putative, expressed	Hypothetical protein At3g10130 [Arabidopsis thaliana (Mouse-ear cress)]	TA90489_4565	n	n	down	down	down	untreated	1758.14	1140.58	1872.36	1803.93	1557.76	1686.17	197.004	112.713	45.8537	86.2834	59.4301	434.579
Ta.12142.1.A1_s_at	Os02g33020.1	SOUL heme-binding protein, putative, expressed	Hypothetical protein At3g10130 [Arabidopsis thaliana (Mouse-ear cress)]	TA90489_4565	n	n	down	down	down	treated	1697.88	792.555	1202.89	742.181	95.9994	278.851	164.88	107.441	183.871	114.98	29.1045	58.5987
Ta.12144.1.A1_at	Os12g24240.1	expressed protein	unknown protein [Arabidopsis thaliana]	TA92993_4565	n	n	n	n	down	untreated	39.9645	40.5749	43.0921	44.9018	43.5654	61.6395	5.81708	7.95779	4.35288	5.89886	4.21648	8.91206
Ta.12144.1.A1_at	Os12g24240.1	expressed protein	unknown protein [Arabidopsis thaliana]	TA92993_4565	n	n	n	n	down	treated	35.6503	47.8291	33.5905	33.642	27.4673	22.2946	5.40049	6.02168	5.77571	6.42662	7.21677	4.24121
Ta.12151.1.A1_at	NA	NA	DNA mismatch repair protein, putative [Oryza sativa (japonica cultivar-group)]	TA97535_4565	n	n	down	down	down	untreated	332.601	159.94	252.373	377.307	387.431	395.949	47.3679	16.3724	9.26659	27.2362	16.8437	110.232
Ta.12151.1.A1_at	NA	NA	DNA mismatch repair protein, putative [Oryza sativa (japonica cultivar-group)]	TA97535_4565	n	n	down	down	down	treated	319.294	117.075	149.736	149.043	45.0023	114.003	18.0354	16.1633	18.6253	19.0071	2.68697	4.31036
Ta.12156.1.A1_at	Os01g60910.1	CBL-interacting serine/threonine-protein kinase 15, putative, expressed	Putative serine/threonine protein kinase [Sorghum bicolor (Sorghum) (Sorghum vulgare)]	TA99981_4565	n	n	n	down	n	untreated	175.767	205.644	70.3469	69.324	220.534	118.373	38.0532	69.3311	10.9009	30.7693	22.8961	57.3443
Ta.12156.1.A1_at	Os01g60910.1	CBL-interacting serine/threonine-protein kinase 15, putative, expressed	Putative serine/threonine protein kinase [Sorghum bicolor (Sorghum) (Sorghum vulgare)]	TA99981_4565	n	n	n	down	n	treated	159.297	136.881	45.7902	38.9003	25.893	25.8843	27.9103	103.373	3.65019	10.872	4.28019	0.273526
Ta.12157.1.A1_at	Os04g47530.1	transmembrane protein 34, putative, expressed	OSJNBb0078D11.6 protein [Oryza sativa (japonica cultivar-group)]	TA96048_4565	n	n	n	up	up	untreated	134.39	155.265	275.561	261.405	171.119	136.892	29.9095	18.6456	8.49978	18.413	21.7877	33.7793
Ta.12157.1.A1_at	Os04g47530.1	transmembrane protein 34, putative, expressed	OSJNBb0078D11.6 protein [Oryza sativa (japonica cultivar-group)]	TA96048_4565	n	n	n	up	up	treated	138.281	204.954	270.497	266.572	401.137	332.197	8.83885	61.4129	15.7379	19.7863	53.6617	7.46719
Ta.12165.1.A1_at	Os01g68750.1	clathrin binding protein, putative, expressed	NA	BQ236123	n	n	n	up	n	untreated	97.5051	209.14	122.12	135.79	113.337	112.618	26.2552	54.3729	8.29807	22.1941	2.128	30.8937
Ta.12165.1.A1_at	Os01g68750.1	clathrin binding protein, putative, expressed	NA	BQ236123	n	n	n	up	n	treated	99.5544	230.971	179.759	187.944	261.714	197.626	18.5469	81.5791	23.9709	24.8421	42.5416	36.0047
Ta.1282.2.S1_x_at	Os12g02340.1	nonspecific lipid-transfer protein 3 precursor, putative, expressed	Type 1 non-specific lipid transfer protein precursor [Triticum aestivum (Wheat)]	TA60734_4565	n	n	down	down	down	untreated	7710.85	4668.24	9808.83	11802.3	12275.4	11466.6	563.863	864.304	596.724	1860.4	631.27	1203.64
Ta.1282.2.S1_x_at	Os12g02340.1	nonspecific lipid-transfer protein 3 precursor, putative, expressed	Type 1 non-specific lipid transfer protein precursor [Triticum aestivum (Wheat)]	TA60734_4565	n	n	down	down	down	treated	6791.09	2116.04	3351.92	3239.9	444.741	75.3216	622.143	874.987	712.019	133.586	160.207	18.6575
Ta.1282.3.S1_x_at	Os11g02424.2	expressed protein	Type 1 non specific lipid transfer protein precursor [Triticum aestivum (Wheat)]	TA64171_4565	n	n	down	down	down	untreated	4381.28	2586.73	4749.95	6068.29	6345.36	5992.45	458.611	456.125	538.234	1281.03	555.222	711.363
Ta.1282.3.S1_x_at	Os11g02424.2	expressed protein	Type 1 non specific lipid transfer protein precursor [Triticum aestivum (Wheat)]	TA64171_4565	n	n	down	down	down	treated	3488.05	1106.89	1720.18	1543.41	221.772	37.9243	413.463	317.996	375.412	108.744	107.3	8.15556
Ta.12834.1.S1_s_at	Os05g02420.2	expressed protein	MYB17 protein [Oryza sativa (japonica cultivar-group)]	TA50009_4565	n	n	n	down	n	untreated	2109.29	3807.94	2917.86	1601.58	4910.75	4691.34	673.933	563.121	564.818	358.297	229.157	1063.63
Ta.12834.1.S1_s_at	Os05g02420.2	expressed protein	MYB17 protein [Oryza sativa (japonica cultivar-group)]	TA50009_4565	n	n	n	down	n	treated	1994.83	3383.87	2004.87	1268.52	1587.24	1736.3	534.986	1787.43	490.553	103.581	159.183	518.48
Ta.12836.1.S1_at	Os02g07690.1	VQ motif family protein, expressed	NA	TA91497_4565	n	up	up	up	n	untreated	1099.14	225.87	232.716	127.767	197.707	412.254	69.8694	53.5158	41.6284	14.8763	23.1412	224.069
Ta.12836.1.S1_at	Os02g07690.1	VQ motif family protein, expressed	NA	TA91497_4565	n	up	up	up	n	treated	1067.42	376.735	487.968	422.754	1103.35	668.481	226.573	106.478	70.9383	22.0873	81.1544	153.475
Ta.1285.1.A1_a_at	Os03g46710.1	zinc ion binding protein, putative, expressed	Hypothetical protein OSJNBa0039O18.3 [Oryza sativa (japonica cultivar-group)]	TA84265_4565	n	n	n	up	up	untreated	35.9641	43.482	46.0273	50.2437	46.3843	31.5851	1.32149	1.56302	12.3812	8.78739	8.64553	8.50323
Ta.1285.1.A1_a_at	Os03g46710.1	zinc ion binding protein, putative, expressed	Hypothetical protein OSJNBa0039O18.3 [Oryza sativa (japonica cultivar-group)]	TA84265_4565	n	n	n	up	up	treated	25.0526	57.5601	43.9532	49.3877	104.093	71.9763	1.54459	15.6991	9.46731	2.90122	19.0833	6.56506
Ta.1285.1.A1_at	Os03g46710.1	zinc ion binding protein, putative, expressed	Hypothetical protein OSJNBa0039O18.3 [Oryza sativa (japonica cultivar-group)]	TA84265_4565	n	n	n	up	n	untreated	89.8326	96.684	113.255	103.938	79.7658	69.2411	16.034	9.70955	16.325	21.5922	9.78522	18.1907
Ta.1285.1.A1_at	Os03g46710.1	zinc ion binding protein, putative, expressed	Hypothetical protein OSJNBa0039O18.3 [Oryza sativa (japonica cultivar-group)]	TA84265_4565	n	n	n	up	n	treated	87.7973	110.106	111.645	103.356	197.499	132.505	9.9307	17.6553	14.26	6.87126	18.4471	19.7769
Ta.12870.1.S1_at	Os03g04590.1	60S ribosomal protein L23, putative, expressed	Ribosomal Pr 117 [Triticum aestivum (Wheat)]	TA57464_4565	n	n	n	down	n	untreated	1664.08	1709.64	1794.76	2848.28	2106.6	2144.82	194.208	326.261	230.342	129.587	157.31	136.518
Ta.12870.1.S1_at	Os03g04590.1	60S ribosomal protein L23, putative, expressed	Ribosomal Pr 117 [Triticum aestivum (Wheat)]	TA57464_4565	n	n	n	down	n	treated	1513.54	1963.73	2168.24	2909.91	716.092	1404.46	92.7366	908.739	56.1102	70.1432	110.726	225.586
Ta.12876.1.S1_a_at	Os12g21890.1	phosphoprotein phosphatase, putative, expressed	Tyrosine phosphatase, putative [Oryza sativa (japonica cultivar-group)]	TA73503_4565	n	n	n	up	up	untreated	748.598	1583.66	1331.93	1213.46	836.423	845.615	39.4647	118.41	46.6196	108.58	117.266	82.222
Ta.12876.1.S1_a_at	Os12g21890.1	phosphoprotein phosphatase, putative, expressed	Tyrosine phosphatase, putative [Oryza sativa (japonica cultivar-group)]	TA73503_4565	n	n	n	up	up	treated	733.199	1653.26	1270.43	1428.46	2580.93	2589.24	11.2425	128.305	185.97	79.748	147.584	327.039
Ta.12876.3.S1_a_at	Os12g21890.1	phosphoprotein phosphatase, putative, expressed	Tyrosine phosphatase, putative [Oryza sativa (japonica cultivar-group)]	TA73504_4565	n	n	n	up	up	untreated	225.028	471.171	390.364	370.845	233.773	229.318	8.30556	22.3275	14.2939	28.0187	23.8824	25.6034
Ta.12876.3.S1_a_at	Os12g21890.1	phosphoprotein phosphatase, putative, expressed	Tyrosine phosphatase, putative [Oryza sativa (japonica cultivar-group)]	TA73504_4565	n	n	n	up	up	treated	209.094	447.307	418.206	393.212	742.372	692.791	21.1116	74.68	55.7427	12.8121	68.5248	85.6041
Ta.12882.1.A1_at	Os04g33690.1	sec23/Sec24 trunk domain containing protein, expressed	OJ000126_13.4 protein [Oryza sativa (japonica cultivar-group)]	TA91447_4565	n	up	up	n	n	untreated	72.5943	216.412	74.6882	105.051	90.9807	89.1064	17.7993	37.6939	6.18048	10.9131	8.74641	28.1404
Ta.12882.1.A1_at	Os04g33690.1	sec23/Sec24 trunk domain containing protein, expressed	OJ000126_13.4 protein [Oryza sativa (japonica cultivar-group)]	TA91447_4565	n	up	up	n	n	treated	64.6007	225.26	150.011	214.262	140.091	65.1354	14.1293	35.1167	23.3222	14.7609	26.0193	10.234
Ta.10329.8.S1_x_at	Os09g38020.1	histone H4, putative, expressed	Homolog of Homo sapiens "Histone 1, H2ai [Takifugu rubripes]	TA52459_4565	n	n	n	down	n	untreated	150.187	129.321	173.695	195.294	221.63	208.556	32.2121	13.2618	3.17096	29.3683	55.6066	46.3196
Ta.10329.8.S1_x_at	Os09g38020.1	histone H4, putative, expressed	Homolog of Homo sapiens "Histone 1, H2ai [Takifugu rubripes]	TA52459_4565	n	n	n	down	n	treated	155.516	133.226	143.127	136.322	88.3993	94.5243	16.1793	14.8714	9.54162	16.2911	7.40662	16.1072
Ta.10333.1.S1_at	Os03g22780.1	PCB2, putative, expressed	PCB2 (PALE-GREEN AND CHLOROPHYLL B REDUCED 2) [Arabidopsis thaliana]	TA96462_4565	n	n	n	down	down	untreated	551.577	305.338	174.436	354.713	525.07	524.337	78.7697	10.7323	13.1032	82.9487	98.2737	101.547
Ta.10333.1.S1_at	Os03g22780.1	PCB2, putative, expressed	PCB2 (PALE-GREEN AND CHLOROPHYLL B REDUCED 2) [Arabidopsis thaliana]	TA96462_4565	n	n	n	down	down	treated	525.237	195.81	155.731	185.445	62.4162	97.4647	97.8225	48.559	41.3502	44.3545	14.9481	6.21485
Ta.10333.3.S1_x_at	Os03g22780.1	PCB2, putative, expressed	PCB2 (PALE-GREEN AND CHLOROPHYLL B REDUCED 2) [Arabidopsis thaliana]	CA698266	n	n	n	down	down	untreated	475.209	322.356	216.512	311.157	364.622	359.032	51.8251	26.2085	0.955235	77.2992	48.6534	65.3509
Ta.10333.3.S1_x_at	Os03g22780.1	PCB2, putative, expressed	PCB2 (PALE-GREEN AND CHLOROPHYLL B REDUCED 2) [Arabidopsis thaliana]	CA698266	n	n	n	down	down	treated	462.252	237.445	320.904	230.506	117.594	149.977	31.2617	21.794	153.797	33.8552	21.7063	16.0799
Ta.10334.2.A1_at	Os07g49110.1	D-alanine-D-alanine ligase, putative, expressed	Hypothetical protein P0034A04.101-1 [Oryza sativa (japonica cultivar-group)]	BJ275161	n	n	n	down	down	untreated	310.714	591.579	278.39	206.37	414.421	410.351	26.9621	30.9732	20.256	60.4228	14.2724	117.203
Ta.10334.2.A1_at	Os07g49110.1	D-alanine-D-alanine ligase, putative, expressed	Hypothetical protein P0034A04.101-1 [Oryza sativa (japonica cultivar-group)]	BJ275161	n	n	n	down	down	treated	343.782	383.668	337.286	160.474	34.4198	35.7375	36.8005	208.912	27.374	19.5836	8.67022	0.572453
Ta.1034.1.A1_at	Os03g12790.1	antiporter/ drug transporter/ transporter, putative, expressed	NA	TA106301_4565	n	n	down	down	down	untreated	765.708	693.138	536.018	526.091	771.677	989.879	20.9176	42.8909	158.251	94.419	137.057	10.5224
Ta.1034.1.A1_at	Os03g12790.1	antiporter/ drug transporter/ transporter, putative, expressed	NA	TA106301_4565	n	n	down	down	down	treated	738.954	549.992	240.686	211.171	71.4327	180.03	43.7233	276.388	11.0697	7.86171	24.5772	42.575
Ta.1034.2.S1_at	Os03g12790.1	antiporter/ drug transporter/ transporter, putative, expressed	NA	BG908411	n	n	n	down	down	untreated	146.233	124.046	120.615	109.327	145.733	167.901	19.7652	15.0151	19.7351	20.9231	20.8738	46.3569
Ta.1034.2.S1_at	Os03g12790.1	antiporter/ drug transporter/ transporter, putative, expressed	NA	BG908411	n	n	n	down	down	treated	141.021	103.873	52.8204	56.0638	31.2975	39.0022	12.4591	48.9789	1.07314	5.96412	4.27285	7.35352
Ta.10347.1.S1_x_at	Os09g29239.1	ATPUP3, putative, expressed	Putative purine permease [Oryza sativa (japonica cultivar-group)]	TA94334_4565	n	n	n	down	n	untreated	258.296	178.773	180.055	206.097	258.928	280.168	24.1212	19.2345	5.81273	19.2598	48.1522	64.4557
Ta.10347.1.S1_x_at	Os09g29239.1	ATPUP3, putative, expressed	Putative purine permease [Oryza sativa (japonica cultivar-group)]	TA94334_4565	n	n	n	down	n	treated	251.885	141.522	152.344	162.483	106.903	296.259	16.7594	19.0106	23.7192	15.3238	18.7267	48.1442
Ta.10349.1.S1_a_at	Os01g32780.1	ethylene-responsive protein, putative, expressed	Putative ER6 protein [Oryza sativa (japonica cultivar-group)]	TA61870_4565	n	n	n	up	n	untreated	1081.38	1406.55	1237.21	1638.94	1497.18	1029.33	116.966	146.364	134.875	253.294	250.842	607.81
Ta.10349.1.S1_a_at	Os01g32780.1	ethylene-responsive protein, putative, expressed	Putative ER6 protein [Oryza sativa (japonica cultivar-group)]	TA61870_4565	n	n	n	up	n	treated	963.97	1874.96	1486.58	1776.98	3965.02	4811.2	170.988	281.748	144.389	98.4327	504.751	456.893
Ta.10349.1.S1_x_at	Os01g32780.1	ethylene-responsive protein, putative, expressed	Putative ER6 protein [Oryza sativa (japonica cultivar-group)]	TA61870_4565	n	n	n	up	up	untreated	973.051	1230.63	1124.7	1464.55	1387.83	1048.49	120.565	151.223	54.4578	142.175	214.582	641.045
Ta.10349.1.S1_x_at	Os01g32780.1	ethylene-responsive protein, putative, expressed	Putative ER6 protein [Oryza sativa (japonica cultivar-group)]	TA61870_4565	n	n	n	up	up	treated	853.338	1771.32	1334.61	1750.45	4854.54	6171.01	134.553	243.247	233.869	44.3587	484.787	595.641
Ta.10349.2.S1_at	Os01g32780.1	ethylene-responsive protein, putative, expressed	Putative ER6 protein [Oryza sativa (japonica cultivar-group)]	TA61868_4565	n	n	n	up	n	untreated	1330.07	1806.72	1373.79	1667.22	1720.68	1127.26	322.299	262.002	175.391	91.3534	219.898	734.914
Ta.10349.2.S1_at	Os01g32780.1	ethylene-responsive protein, putative, expressed	Putative ER6 protein [Oryza sativa (japonica cultivar-group)]	TA61868_4565	n	n	n	up	n	treated	1232.5	2166.94	1497.55	1721.23	3872.31	4177.1	251.177	405.73	166.291	87.1039	675.191	525.656
Ta.10349.3.S1_x_at	Os01g32780.1	ethylene-responsive protein, putative, expressed	Putative ER6 protein [Oryza sativa (japonica cultivar-group)]	TA61873_4565	n	n	n	up	n	untreated	1117.08	1301.29	1204	1557.97	1553.45	1127.07	143.522	145.379	22.204	155.376	250.17	659.785
Ta.10349.3.S1_x_at	Os01g32780.1	ethylene-responsive protein, putative, expressed	Putative ER6 protein [Oryza sativa (japonica cultivar-group)]	TA61873_4565	n	n	n	up	n	treated	964.04	1897.76	1434.41	1887.1	4285.36	5201.66	167.772	238.335	247.815	52.6627	472.856	334.418
Ta.10350.1.S1_at	Os07g36180.1	EMB1417, putative, expressed	Pentatricopeptide (PPR) repeat-containing protein-like protein [Oryza sativa (japonica cultivar-group)]	TA80447_4565	n	n	n	down	n	untreated	1372.22	796.625	1021.78	1174.76	1192.66	1428.56	83.9184	39.6248	81.9897	128.92	24.0439	413.164
Ta.10350.1.S1_at	Os07g36180.1	EMB1417, putative, expressed	Pentatricopeptide (PPR) repeat-containing protein-like protein [Oryza sativa (japonica cultivar-group)]	TA80447_4565	n	n	n	down	n	treated	1295.39	662.848	788.433	631.661	240.028	488.48	109.479	71.263	84.6524	40.9077	4.15435	73.1194
Ta.10350.3.S1_x_at	Os07g36180.1	EMB1417, putative, expressed	Pentatricopeptide (PPR) repeat-containing protein-like protein [Oryza sativa (japonica cultivar-group)]	TA108967_4565	n	n	n	down	n	untreated	67.7858	57.8531	60.817	74.4787	73.4172	85.5022	6.05219	5.1743	6.99181	4.11062	7.8991	19.5576
Ta.10350.3.S1_x_at	Os07g36180.1	EMB1417, putative, expressed	Pentatricopeptide (PPR) repeat-containing protein-like protein [Oryza sativa (japonica cultivar-group)]	TA108967_4565	n	n	n	down	n	treated	64.6026	44.2287	54.2841	48.6419	32.7623	48.9127	11.5409	4.30324	2.84054	4.79418	4.49378	5.31458
Ta.10354.1.S1_x_at	Os06g22060.4	pyrophosphate--fructose 6-phosphate 1-phosphotransferase alpha subunit, putative, expressed	Pyrophosphate--fructose 6-phosphate 1-phosphotransferase alpha subunit [Ricinus communis (Castor bean)]	TA84085_4565	n	n	n	down	down	untreated	571.238	442.736	315.725	251.345	353.433	441.904	57.6871	18.8369	17.5042	36.3322	22.5616	92.7082
Ta.10354.1.S1_x_at	Os06g22060.4	pyrophosphate--fructose 6-phosphate 1-phosphotransferase alpha subunit, putative, expressed	Pyrophosphate--fructose 6-phosphate 1-phosphotransferase alpha subunit [Ricinus communis (Castor bean)]	TA84085_4565	n	n	n	down	down	treated	564.018	329.111	227.588	193.8	67.1451	82.8623	83.7103	141.918	26.5614	6.58544	6.74857	11.5687
Ta.10354.2.S1_x_at	Os06g22060.4	pyrophosphate--fructose 6-phosphate 1-phosphotransferase alpha subunit, putative, expressed	Putative diphosphate-fructose-6-phosphate 1-phosphotransferase alpha chain [Oryza sativa (japonica cultivar-group)]	BJ262717	n	n	n	down	down	untreated	471.056	373.268	280.758	244.131	313.986	358.524	34.7803	37.4117	15.0531	24.0613	17.4092	81.9074
Ta.10354.2.S1_x_at	Os06g22060.4	pyrophosphate--fructose 6-phosphate 1-phosphotransferase alpha subunit, putative, expressed	Putative diphosphate-fructose-6-phosphate 1-phosphotransferase alpha chain [Oryza sativa (japonica cultivar-group)]	BJ262717	n	n	n	down	down	treated	447.275	261.527	193.897	173.696	60.5409	68.1829	31.0584	90.6805	14.5486	14.9832	10.5816	12.56
Ta.10358.1.A1_at	Os03g13460.1	microtubule-associated protein MAP65-1a, putative, expressed	Hypothetical protein OJ1081D05.10 [Oryza sativa (japonica cultivar-group)]	TA95422_4565	n	n	n	down	down	untreated	263.92	294.74	233.931	405.957	321.676	380.655	3.04714	43.2493	27.7958	86.0961	49.573	119.178
Ta.10358.1.A1_at	Os03g13460.1	microtubule-associated protein MAP65-1a, putative, expressed	Hypothetical protein OJ1081D05.10 [Oryza sativa (japonica cultivar-group)]	TA95422_4565	n	n	n	down	down	treated	251.803	258.455	169.764	277.727	69.4689	121.42	11.016	19.2643	9.43136	16.2315	13.533	15.3612
Ta.10361.1.S1_at	Os04g33470.1	ACI14, putative, expressed	OSJNBa0042I15.22 protein [Oryza sativa (Rice)]	TA81365_4565	n	n	down	down	down	untreated	742.132	628.083	953.905	952.369	789.763	785.923	33.448	76.0933	30.8581	186.434	45.3173	51.2265
Ta.10361.1.S1_at	Os04g33470.1	ACI14, putative, expressed	OSJNBa0042I15.22 protein [Oryza sativa (Rice)]	TA81365_4565	n	n	down	down	down	treated	727.481	431.327	793.43	427.678	101.285	334.198	31.751	57.8773	199.426	47.1965	4.46589	61.276
Ta.10364.1.S1_at	Os05g45450.1	nuclear protein, putative, expressed	Putative nuclear protein [Hordeum vulgare (Barley)]	TA88627_4565	n	n	n	up	up	untreated	74.0529	82.8384	74.7188	65.5052	65.616	91.6708	5.25025	6.21704	9.56524	8.49398	3.09322	13.7336
Ta.10364.1.S1_at	Os05g45450.1	nuclear protein, putative, expressed	Putative nuclear protein [Hordeum vulgare (Barley)]	TA88627_4565	n	n	n	up	up	treated	69.1299	89.037	78.5733	76.6066	678.303	1117.18	8.96622	21.9003	9.64237	8.3617	260.15	441.946
Ta.10364.1.S1_s_at	Os05g45450.1	nuclear protein, putative, expressed	Putative nuclear protein [Hordeum vulgare (Barley)]	TA88627_4565	n	n	n	up	up	untreated	34.4137	30.7662	28.1507	27.5531	31.4553	37.0777	10.4902	1.98439	3.08059	0.382612	2.71747	2.35085
Ta.10364.1.S1_s_at	Os05g45450.1	nuclear protein, putative, expressed	Putative nuclear protein [Hordeum vulgare (Barley)]	TA88627_4565	n	n	n	up	up	treated	32.2107	30.2485	29.9531	26.0525	213.05	418.112	4.24991	5.20028	1.119	4.44057	95.5568	122.544
Ta.10367.1.S1_at	Os03g01940.3	expressed protein	Hypothetical protein OSJNBb0043P23.19 [Oryza sativa (japonica cultivar-group)]	TA98663_4565	n	n	n	down	n	untreated	28.2461	20.9779	28.1296	45.1921	32.0478	31.6038	7.3562	2.57279	2.93645	14.0213	8.46891	6.3924
Ta.10367.1.S1_at	Os03g01940.3	expressed protein	Hypothetical protein OSJNBb0043P23.19 [Oryza sativa (japonica cultivar-group)]	TA98663_4565	n	n	n	down	n	treated	27.365	18.4476	23.4047	26.8048	15.8979	20.8729	7.61998	5.64342	2.17527	4.98297	0.98576	2.85916
Ta.10371.1.S1_at	Os03g44830.2	rhomboid family protein, expressed	Putative Rhomboid family protein [Oryza sativa (japonica cultivar-group)]	TA79471_4565	n	n	n	up	up	untreated	283.044	538.149	349.507	371.953	319.924	302.899	26.3154	138.857	35.5209	38.486	29.2458	87.5558
Ta.10371.1.S1_at	Os03g44830.2	rhomboid family protein, expressed	Putative Rhomboid family protein [Oryza sativa (japonica cultivar-group)]	TA79471_4565	n	n	n	up	up	treated	281.583	597.194	416.301	599.894	1028.98	742.382	29.5784	47.7884	45.5779	52.6912	48.236	31.8387
Ta.10371.2.A1_at	Os03g44830.1	rhomboid family protein, expressed	Putative Rhomboid family protein [Oryza sativa (japonica cultivar-group)]	TA79472_4565	n	n	n	up	n	untreated	315.715	603.677	382.508	395.269	366.721	355.103	27.4612	129.263	13.7646	10.3891	15.3746	127.104
Ta.10371.2.A1_at	Os03g44830.1	rhomboid family protein, expressed	Putative Rhomboid family protein [Oryza sativa (japonica cultivar-group)]	TA79472_4565	n	n	n	up	n	treated	290.361	686.792	457.004	702.947	1180.22	902.409	22.5864	52.2393	36.1921	36.2486	80.7321	44.2376
Ta.10377.1.A1_at	Os10g22560.2	peptide transporter PTR2, putative, expressed	Putative proton-dependent oligopeptide transport [Oryza sativa (japonica cultivar-group)]	TA93277_4565	n	n	n	down	n	untreated	82.0968	101.878	61.0523	59.0645	152.555	170.373	8.34939	8.70626	7.62029	7.87933	16.3587	23.058
Ta.10377.1.A1_at	Os10g22560.2	peptide transporter PTR2, putative, expressed	Putative proton-dependent oligopeptide transport [Oryza sativa (japonica cultivar-group)]	TA93277_4565	n	n	n	down	n	treated	89.0432	70.8806	54.4811	51.4769	58.6549	63.9753	4.12307	22.1603	10.3596	6.09679	5.89613	15.1677
Ta.10390.1.S1_at	Os08g44270.1	vignain precursor, putative, expressed	Putative cysteine proteinase [Oryza sativa (japonica cultivar-group)]	TA73655_4565	n	n	n	n	up	untreated	234.745	100.649	100.194	208.956	122.136	167.542	126.23	13.5501	1.6625	36.2384	7.87963	56.5508
Ta.10390.1.S1_at	Os08g44270.1	vignain precursor, putative, expressed	Putative cysteine proteinase [Oryza sativa (japonica cultivar-group)]	TA73655_4565	n	n	n	n	up	treated	210.2	92.5195	96.0097	199.887	261.127	1269.84	73.804	47.9002	40.3446	68.1803	99.7354	111.854
Ta.10395.1.S1_a_at	Os01g53880.5	OsIAA6 - Auxin-responsive Aux/IAA gene family member, expressed	Auxin-responsive protein IAA6 [Oryza sativa (Rice)]	TA52097_4565	n	n	n	down	n	untreated	8289.98	1777.38	2412.98	1159.16	1097.41	1042.69	2698.93	427.684	355.294	197.912	60.1797	169.402
Ta.10395.1.S1_a_at	Os01g53880.5	OsIAA6 - Auxin-responsive Aux/IAA gene family member, expressed	Auxin-responsive protein IAA6 [Oryza sativa (Rice)]	TA52097_4565	n	n	n	down	n	treated	7883.77	1561.58	1550.87	751.794	523.575	641.003	2438.38	836.751	186.904	14.3841	28.2343	59.7541
Ta.10399.1.S1_at	Os01g01302.1	shikimate kinase family protein, expressed	P0402A09.24 protein [Oryza sativa (japonica cultivar-group)]	TA76914_4565	n	n	n	down	down	untreated	2662.75	1642.46	1194.35	1456.93	1837.16	2205.21	208.361	183.807	205.911	472.618	20.9829	962.828
Ta.10399.1.S1_at	Os01g01302.1	shikimate kinase family protein, expressed	P0402A09.24 protein [Oryza sativa (japonica cultivar-group)]	TA76914_4565	n	n	n	down	down	treated	2614.25	1132.12	975.06	819.966	132.82	151.17	347.051	363.454	332.438	83.5902	64.3436	23.3926
Ta.10402.1.S1_x_at	Os03g04340.1	24-methylenesterol C-methyltransferase 2, putative, expressed	24-methylenesterol C-methyltransferase 2 [Oryza sativa (Rice)]	TA73869_4565	n	n	n	down	n	untreated	3683.32	2978.97	3258.98	3259.87	3034.36	3271.24	521.774	126.593	154.108	183.337	239.097	314.259
Ta.10402.1.S1_x_at	Os03g04340.1	24-methylenesterol C-methyltransferase 2, putative, expressed	24-methylenesterol C-methyltransferase 2 [Oryza sativa (Rice)]	TA73869_4565	n	n	n	down	n	treated	3775.12	2458.48	2701.14	2353.33	1330.95	2621.69	419.871	206.536	236.796	132.148	150.541	224.771
Ta.10402.3.A1_at	Os03g04340.1	24-methylenesterol C-methyltransferase 2, putative, expressed	24-methylenesterol C-methyltransferase 2 [Oryza sativa (Rice)]	TA73865_4565	n	n	n	down	n	untreated	1802.04	2334.2	1898.68	2353.62	2329.04	2115.78	170.597	498.284	191.981	274.323	508.182	136.993
Ta.10402.3.A1_at	Os03g04340.1	24-methylenesterol C-methyltransferase 2, putative, expressed	24-methylenesterol C-methyltransferase 2 [Oryza sativa (Rice)]	TA73865_4565	n	n	n	down	n	treated	1799.53	1901.32	1656.96	2115.71	939.076	2540.67	135.158	396.616	150.708	64.9544	176.747	112.933
Ta.10402.3.A1_x_at	Os03g04340.1	24-methylenesterol C-methyltransferase 2, putative, expressed	24-methylenesterol C-methyltransferase 2 [Oryza sativa (Rice)]	CK163746	n	n	n	down	n	untreated	1946.6	2285.12	1810.53	2276.33	2371.04	2198.96	167.887	391.253	148.117	137.261	488.56	102.087
Ta.10402.3.A1_x_at	Os03g04340.1	24-methylenesterol C-methyltransferase 2, putative, expressed	24-methylenesterol C-methyltransferase 2 [Oryza sativa (Rice)]	CK163746	n	n	n	down	n	treated	1918.01	1786.48	1758.3	2054.34	921.37	2497.34	193.892	164.503	77.114	100.994	171.574	196.877
Ta.10408.1.S1_at	Os11g04720.1	OsRR9 - Rice type-A response regulator, expressed	NA	TA75114_4565	n	n	n	down	n	untreated	4325.56	1592.5	279.195	358.483	1500.14	878.546	537.477	180.796	52.2079	135.319	191.724	239.495
Ta.10408.1.S1_at	Os11g04720.1	OsRR9 - Rice type-A response regulator, expressed	NA	TA75114_4565	n	n	n	down	n	treated	4351.45	1049.48	225.031	286.731	529.79	196.509	510.656	825.517	62.9433	61.0358	18.5767	62.5665
Ta.10410.1.S1_at	Os01g40630.1	carboxy-lyase, putative, expressed	Hypothetical protein P0663C08.4 [Oryza sativa (japonica cultivar-group)]	TA66394_4565	n	n	n	up	n	untreated	248.981	216.923	161.946	83.9512	187.581	133.907	26.4692	56.6827	24.8611	15.317	15.803	26.5606
Ta.10410.1.S1_at	Os01g40630.1	carboxy-lyase, putative, expressed	Hypothetical protein P0663C08.4 [Oryza sativa (japonica cultivar-group)]	TA66394_4565	n	n	n	up	n	treated	218.791	247.135	145.916	154.813	484.992	209.756	37.4448	127.193	33.957	3.00841	115.38	51.8488
Ta.1042.1.S1_x_at	Os10g35110.1	alpha-galactosidase precursor, putative, expressed	Alpha-galactosidase [Hordeum vulgare (Barley)]	TA51267_4565	n	n	n	down	n	untreated	262.025	1719	1785.03	1328.97	318.627	179.428	48.3872	831.769	755.355	214.925	81.8593	8.03882
Ta.1042.1.S1_x_at	Os10g35110.1	alpha-galactosidase precursor, putative, expressed	Alpha-galactosidase [Hordeum vulgare (Barley)]	TA51267_4565	n	n	n	down	n	treated	232.787	1490.96	994.84	693.36	83.3986	151.53	20.6145	690.585	168.499	83.353	17.6395	96.3204
Ta.10423.1.S1_x_at	Os04g57410.1	methylthioribose kinase, putative, expressed	NA	TA55809_4565	n	n	down	down	n	untreated	163.576	144.385	126.189	217.545	221.251	190.957	31.0483	2.92429	14.6499	12.3957	3.86577	51.9381
Ta.10423.1.S1_x_at	Os04g57410.1	methylthioribose kinase, putative, expressed	NA	TA55809_4565	n	n	down	down	n	treated	167.329	120.817	82.5832	102.624	33.7023	97.2912	30.4744	9.28542	14.2979	8.19996	2.99015	13.7132
Ta.10425.2.S1_a_at	Os02g08260.1	HDDC2 protein, putative, expressed	At2g23820 [Arabidopsis thaliana (Mouse-ear cress)]	TA78911_4565	n	n	n	down	n	untreated	468.072	258.36	372.77	562.83	331.503	369.091	73.8753	9.1256	28.9681	212.875	45.1073	84.945
Ta.10425.2.S1_a_at	Os02g08260.1	HDDC2 protein, putative, expressed	At2g23820 [Arabidopsis thaliana (Mouse-ear cress)]	TA78911_4565	n	n	n	down	n	treated	470.73	155.851	436.166	251.201	42.0875	128.488	55.4925	14.1135	262.404	83.4755	10.829	29.7463
Ta.10431.1.S1_a_at	Os11g38800.1	zinc finger protein, putative, expressed	Zinc finger, C3HC4 type, putative [Oryza sativa (japonica cultivar-group)]	TA52087_4565	n	n	n	up	up	untreated	747.926	858.942	834.694	705.532	665.943	692.793	18.399	59.0349	47.5708	57.2491	60.2267	130.293
Ta.10431.1.S1_a_at	Os11g38800.1	zinc finger protein, putative, expressed	Zinc finger, C3HC4 type, putative [Oryza sativa (japonica cultivar-group)]	TA52087_4565	n	n	n	up	up	treated	697.067	1012.28	880.489	1106.67	2480.13	1856.58	19.2858	158.294	135.795	92.4479	162.48	171.428
Ta.10431.1.S1_at	Os11g38800.1	zinc finger protein, putative, expressed	Zinc finger, C3HC4 type, putative [Oryza sativa (japonica cultivar-group)]	TA52207_4565	n	n	n	up	up	untreated	1492.24	1659.43	1637.52	1414.38	1370.71	1335.47	60.7929	39.4892	83.6023	81.5882	167.076	229.359
Ta.10431.1.S1_at	Os11g38800.1	zinc finger protein, putative, expressed	Zinc finger, C3HC4 type, putative [Oryza sativa (japonica cultivar-group)]	TA52207_4565	n	n	n	up	up	treated	1456.1	2083.45	1878.6	2319.99	4809.83	3504.45	32.1703	306.577	148.414	110.778	210.328	369.304
Ta.10431.2.A1_a_at	Os11g38800.1	zinc finger protein, putative, expressed	Zinc finger, C3HC4 type, putative [Oryza sativa (japonica cultivar-group)]	TA52207_4565	n	n	n	up	up	untreated	477.596	525.259	549.9	477.586	451.465	444.952	37.2189	29.8705	36.8648	49.7022	24.0464	75.4693
Ta.10431.2.A1_a_at	Os11g38800.1	zinc finger protein, putative, expressed	Zinc finger, C3HC4 type, putative [Oryza sativa (japonica cultivar-group)]	TA52207_4565	n	n	n	up	up	treated	454.945	630.329	553.379	720.548	1544.94	1180.13	13.8895	97.1288	88.9124	56.1502	140.313	83.0869
Ta.10431.2.A1_x_at	Os11g38800.1	zinc finger protein, putative, expressed	Zinc finger, C3HC4 type, putative [Oryza sativa (japonica cultivar-group)]	TA52207_4565	n	n	n	up	up	untreated	708.936	823.886	829.01	692.279	651.676	651.04	41.1969	44.714	65.2337	36.1016	51.4191	156.93
Ta.10431.2.A1_x_at	Os11g38800.1	zinc finger protein, putative, expressed	Zinc finger, C3HC4 type, putative [Oryza sativa (japonica cultivar-group)]	TA52207_4565	n	n	n	up	up	treated	668.678	1000.66	945.229	1132.27	2716.41	1966.05	13.3643	149.927	118.914	54.4355	193.855	202.973
Ta.10436.1.S1_at	Os03g51990.1	amino acid binding protein, putative, expressed	Putative ACT domain containing protein [Oryza sativa (japonica cultivar-group)]	TA104505_4565	n	n	n	down	down	untreated	78.4723	46.293	28.8216	33.1188	72.6394	63.9267	16.2967	5.59095	5.18204	5.56501	10.6878	13.2958
Ta.10436.1.S1_at	Os03g51990.1	amino acid binding protein, putative, expressed	Putative ACT domain containing protein [Oryza sativa (japonica cultivar-group)]	TA104505_4565	n	n	n	down	down	treated	74.8665	31.9953	22.0422	26.4555	26.6999	26.2606	6.74099	12.3115	2.2932	8.50117	3.71508	0.652027
Ta.10438.1.S1_x_at	Os09g24690.1	60S ribosomal protein L34, putative, expressed	Putative ribosomal protein L34 [Oryza sativa (japonica cultivar-group)]	BJ285224	n	up	n	n	n	untreated	619.308	1073.2	795.401	2125.08	1140.7	1165.6	145.887	537.789	186.413	331.62	178.347	138.115
Ta.10438.1.S1_x_at	Os09g24690.1	60S ribosomal protein L34, putative, expressed	Putative ribosomal protein L34 [Oryza sativa (japonica cultivar-group)]	BJ285224	n	up	n	n	n	treated	463.839	1957.11	1703.08	3570.05	657.663	1163.39	27.9182	1805.02	129.241	276.9	122.234	330.498
Ta.10443.1.S1_at	Os01g53930.1	hexokinase-1, putative, expressed	Putative hexokinase [Oryza sativa (japonica cultivar-group)]	TA50300_4565	n	n	n	down	n	untreated	393.216	421.466	473.211	555.589	502.151	361.54	60.2709	60.7969	71.5079	42.1122	40.6761	100.713
Ta.10443.1.S1_at	Os01g53930.1	hexokinase-1, putative, expressed	Putative hexokinase [Oryza sativa (japonica cultivar-group)]	TA50300_4565	n	n	n	down	n	treated	368.273	392.581	379.925	401.438	198.747	207.429	16.6406	11.641	31.1202	13.5521	6.25852	19.5073
Ta.10443.2.S1_at	Os01g53930.1	hexokinase-1, putative, expressed	Putative hexokinase [Oryza sativa (japonica cultivar-group)]	TA106190_4565	n	n	n	down	n	untreated	236.651	247.8	286.962	325.281	291.704	190.569	35.8628	11.0336	56.6125	18.195	45.317	63.0236
Ta.10443.2.S1_at	Os01g53930.1	hexokinase-1, putative, expressed	Putative hexokinase [Oryza sativa (japonica cultivar-group)]	TA106190_4565	n	n	n	down	n	treated	201.886	235.998	238.703	222.497	88.8698	85.813	34.9788	6.2344	26.404	31.4002	4.01611	20.8046
Ta.10449.2.S1_at	Os06g40370.1	CBL-interacting serine/threonine-protein kinase 24, putative, expressed	Putative serine/threonine kinase [Oryza sativa (japonica cultivar-group)]	TA103233_4565	n	n	n	down	n	untreated	199.724	145.6	77.1286	81.4468	205.816	166.948	17.6553	20.9425	10.305	13.4473	17.9569	46.1006
Ta.10449.2.S1_at	Os06g40370.1	CBL-interacting serine/threonine-protein kinase 24, putative, expressed	Putative serine/threonine kinase [Oryza sativa (japonica cultivar-group)]	TA103233_4565	n	n	n	down	n	treated	191.778	108.069	62.8073	46.9882	61.5457	123.657	29.9195	51.0745	6.35033	10.0612	13.3432	17.4998
Ta.10451.1.A1_at	Os11g17380.1	protein kinase domain containing protein	NA	TA110127_4565	n	up	up	up	n	untreated	185.902	43.9994	29.3552	23.9115	24.5879	60.4866	38.123	16.4733	6.00726	3.79051	4.14389	57.2818
Ta.10451.1.A1_at	Os11g17380.1	protein kinase domain containing protein	NA	TA110127_4565	n	up	up	up	n	treated	190.291	177.694	139.837	364.262	1935.5	185.989	76.7983	156.352	30.1925	23.3461	528.543	19.2081
Ta.10451.2.A1_x_at	Os11g17380.1	protein kinase domain containing protein	NA	TA97563_4565	n	up	up	up	n	untreated	850.34	129.194	49.8875	47.5542	51.3549	185.855	207.724	56.9412	24.3909	31.2797	14.4227	257.172
Ta.10451.2.A1_x_at	Os11g17380.1	protein kinase domain containing protein	NA	TA97563_4565	n	up	up	up	n	treated	955.519	429.382	327.375	843.334	4518.39	591.77	556.955	401.981	58.1178	96.8175	388.911	15.6283
Ta.10452.1.S1_at	Os11g39670.1	seryl-tRNA synthetase, putative, expressed	Serine-tRNA ligase serS [Oryza sativa (japonica cultivar-group)]	TA76536_4565	n	n	n	down	n	untreated	885.466	583.51	670.595	826.636	773.899	824.671	46.5238	7.73309	31.9376	116.422	21.0904	166.801
Ta.10452.1.S1_at	Os11g39670.1	seryl-tRNA synthetase, putative, expressed	Serine-tRNA ligase serS [Oryza sativa (japonica cultivar-group)]	TA76536_4565	n	n	n	down	n	treated	827.815	500.345	600.159	530.729	197.241	381.438	2.84747	21.0568	57.4137	19.5681	8.45481	70.4426
Ta.10452.2.S1_a_at	Os11g39670.1	seryl-tRNA synthetase, putative, expressed	NA	CA629541	n	n	n	down	n	untreated	309.091	218.725	265.261	287.025	263.59	274.853	24.801	16.4078	14.957	27.8799	15.5686	44.5855
Ta.10452.2.S1_a_at	Os11g39670.1	seryl-tRNA synthetase, putative, expressed	NA	CA629541	n	n	n	down	n	treated	307.619	188.13	245.465	197.233	94.8295	148.151	10.4615	20.6902	28.5906	22.4776	9.38224	36.1741
Ta.10452.2.S1_x_at	Os11g39670.1	seryl-tRNA synthetase, putative, expressed	NA	CA629541	n	n	n	down	n	untreated	70.0319	51.248	58.7059	62.7628	61.9253	62.0384	5.42631	4.02962	2.83792	9.84015	4.99313	11.1086
Ta.10452.2.S1_x_at	Os11g39670.1	seryl-tRNA synthetase, putative, expressed	NA	CA629541	n	n	n	down	n	treated	66.3436	43.2584	52.2036	47.6682	29.9184	37.9145	2.46111	2.74679	2.25569	2.33139	4.85842	2.53464
Ta.10463.1.A1_at	Os04g33500.2	protein kinase KIPK, putative, expressed	Protein kinase KIPK [Oryza sativa (japonica cultivar-group)]	TA73847_4565	n	n	n	down	down	untreated	565.938	573.005	176.776	238.063	937.917	838.312	79.4335	24.8425	29.9493	50.1504	57.2705	108.732
Ta.10463.1.A1_at	Os04g33500.2	protein kinase KIPK, putative, expressed	Protein kinase KIPK [Oryza sativa (japonica cultivar-group)]	TA73847_4565	n	n	n	down	down	treated	515.445	342.294	141.683	149.438	153.767	253.144	53.8676	175.709	15.5183	20.0013	14.9143	17.3858
Ta.10466.1.S1_at	Os03g07890.1	mitochondrial carrier-like protein, putative, expressed	Putative Tricarboxylate transport protein, mitochondrial [Oryza sativa (japonica cultivar-group)]	TA94832_4565	n	n	n	n	down	untreated	125.495	71.6283	48.1067	47.6162	101.481	146.481	36.4614	27.2492	6.99191	18.1279	41.767	58.758
Ta.10466.1.S1_at	Os03g07890.1	mitochondrial carrier-like protein, putative, expressed	Putative Tricarboxylate transport protein, mitochondrial [Oryza sativa (japonica cultivar-group)]	TA94832_4565	n	n	n	n	down	treated	116.509	52.0974	45.7947	40.0991	36.5081	43.8489	26.1745	8.48586	13.1108	8.52122	3.75131	6.86281
Ta.10466.1.S1_s_at	Os03g07890.1	mitochondrial carrier-like protein, putative, expressed	Putative Tricarboxylate transport protein, mitochondrial [Oryza sativa (japonica cultivar-group)]	TA94832_4565	n	n	n	down	down	untreated	757.416	440.276	341.176	329.757	570.587	801.96	256.791	150.575	54.1445	110.15	277.252	313.536
Ta.10466.1.S1_s_at	Os03g07890.1	mitochondrial carrier-like protein, putative, expressed	Putative Tricarboxylate transport protein, mitochondrial [Oryza sativa (japonica cultivar-group)]	TA94832_4565	n	n	n	down	down	treated	681.202	286.071	312.777	263.386	178.114	258.148	135.89	72.1865	90.8983	64.3558	9.90197	43.9554
Ta.10467.1.A1_at	Os06g09180.1	OsMKK5 - putative MAPKK based on amino acid sequence homology, expressed	Putative MAP kinase kinase [Oryza sativa (japonica cultivar-group)]	TA95970_4565	n	n	n	up	n	untreated	146.698	184.839	120.409	118.566	119.09	119.515	19.0341	6.94799	22.3923	12.452	14.185	26.7904
Ta.10467.1.A1_at	Os06g09180.1	OsMKK5 - putative MAPKK based on amino acid sequence homology, expressed	Putative MAP kinase kinase [Oryza sativa (japonica cultivar-group)]	TA95970_4565	n	n	n	up	n	treated	143.191	221.914	168.885	179.106	248.592	179.768	28.3806	28.9823	15.8609	5.73383	18.2208	20.899
Ta.1047.2.S1_a_at	Os12g07150.1	glutamyl-tRNA, putative, expressed	N-acylethanolamine amidohydrolase [Oryza sativa (japonica cultivar-group)]	TA51290_4565	n	n	n	down	down	untreated	791.488	1138.28	380.882	393.685	1395.28	1522.2	97.9562	222.523	53.1134	84.7804	89.4669	139.497
Ta.1047.2.S1_a_at	Os12g07150.1	glutamyl-tRNA, putative, expressed	N-acylethanolamine amidohydrolase [Oryza sativa (japonica cultivar-group)]	TA51290_4565	n	n	n	down	down	treated	742.24	583.29	468.406	376.895	675.779	598.227	88.9663	211.087	92.3644	54.1809	57.7704	114.984
Ta.1047.3.S1_a_at	Os12g07150.1	glutamyl-tRNA, putative, expressed	N-acylethanolamine amidohydrolase [Oryza sativa (japonica cultivar-group)]	TA50604_4565	n	n	n	down	down	untreated	322.792	434.703	127.529	141.627	553.768	588.729	12.5069	72.7293	21.6468	32.247	43.8795	91.1231
Ta.1047.3.S1_a_at	Os12g07150.1	glutamyl-tRNA, putative, expressed	N-acylethanolamine amidohydrolase [Oryza sativa (japonica cultivar-group)]	TA50604_4565	n	n	n	down	down	treated	286.559	211.579	166.296	128.144	217.717	184.789	44.2781	94.6388	52.5906	34.4252	30.793	32.7539
Ta.10473.1.S1_at	Os03g19560.1	psbB mRNA maturation factor Mbb1, chloroplast precursor, putative, expressed	Similarity to O-linked GlcNAc transferase [Arabidopsis thaliana (Mouse-ear cress)]	TA76059_4565	n	n	down	down	down	untreated	2336.97	1662.16	1522.81	854.733	2481.97	2803.48	16.587	56.2922	140.564	109.734	284.103	431.505
Ta.10473.1.S1_at	Os03g19560.1	psbB mRNA maturation factor Mbb1, chloroplast precursor, putative, expressed	Similarity to O-linked GlcNAc transferase [Arabidopsis thaliana (Mouse-ear cress)]	TA76059_4565	n	n	down	down	down	treated	2272.27	964.473	1148.97	373.301	258.708	1008.8	62.5916	526.934	64.4527	54.3825	75.8151	83.1801
Ta.10473.3.S1_a_at	Os03g19560.1	psbB mRNA maturation factor Mbb1, chloroplast precursor, putative, expressed	Hypothetical protein At3g17040 [Arabidopsis thaliana (Mouse-ear cress)]	TA76056_4565	n	n	down	down	down	untreated	674.52	473.461	432.549	228.747	752.346	864.081	17.6799	19.1317	21.1869	51.2641	76.1524	154.018
Ta.10473.3.S1_a_at	Os03g19560.1	psbB mRNA maturation factor Mbb1, chloroplast precursor, putative, expressed	Hypothetical protein At3g17040 [Arabidopsis thaliana (Mouse-ear cress)]	TA76056_4565	n	n	down	down	down	treated	675.993	246.131	394.565	96.534	64.8389	243.571	34.9477	144.545	130.689	28.2291	15.18	32.5434
Ta.1048.1.S1_at	Os05g49880.1	malate dehydrogenase, mitochondrial precursor, putative, expressed	Putative mitochondrial NAD-dependent malate dehydrogenase [Solanum tuberosum (Potato)]	CA631458	n	n	n	down	down	untreated	2135.67	3120.4	1368.58	1537	2036.05	2333.49	117.065	473.584	103.342	247.908	226.441	441.927
Ta.1048.1.S1_at	Os05g49880.1	malate dehydrogenase, mitochondrial precursor, putative, expressed	Putative mitochondrial NAD-dependent malate dehydrogenase [Solanum tuberosum (Potato)]	CA631458	n	n	n	down	down	treated	2049.95	2413.55	1909.06	1743.25	806.634	846.507	84.4827	644.189	389.717	142.396	111.391	138.341
Ta.10480.1.S1_a_at	Os09g36680.1	ribonuclease 3 precursor, putative, expressed	S-like RNase [Triticum aestivum (Wheat)]	TA71450_4565	n	n	n	down	down	untreated	236.673	588.581	830.861	573.575	292.17	888.943	149.044	129.835	97.2419	264.042	66.4414	598.837
Ta.10480.1.S1_a_at	Os09g36680.1	ribonuclease 3 precursor, putative, expressed	S-like RNase [Triticum aestivum (Wheat)]	TA71450_4565	n	n	n	down	down	treated	253.734	480.2	457.848	291.34	61.9376	30.955	166.471	188.467	50.0103	13.0273	24.8177	3.25985
Ta.10485.1.A1_x_at	Os01g55050.1	calcium-binding protein, putative, expressed	P0503C12.12 [Oryza sativa (japonica cultivar-group)]	TA73201_4565	n	n	n	n	up	untreated	416.311	546.249	667.34	641.226	429.067	484.495	70.8419	146.351	97.3111	120.014	34.6388	62.793
Ta.10485.1.A1_x_at	Os01g55050.1	calcium-binding protein, putative, expressed	P0503C12.12 [Oryza sativa (japonica cultivar-group)]	TA73201_4565	n	n	n	n	up	treated	433.337	529.488	569.003	504.34	785.322	1119.44	23.2564	36.7716	48.2257	64.5326	68.8303	158.937
Ta.10486.1.S1_at	Os08g02050.1	transposon protein, putative, unclassified, expressed	Putative CRK1 protein [Oryza sativa (japonica cultivar-group)]	TA84868_4565	n	n	n	up	n	untreated	1059.35	1189.87	887.807	814.609	655.075	679.921	91.5428	238.643	60.556	106.426	70.8608	160.556
Ta.10486.1.S1_at	Os08g02050.1	transposon protein, putative, unclassified, expressed	Putative CRK1 protein [Oryza sativa (japonica cultivar-group)]	TA84868_4565	n	n	n	up	n	treated	971.903	1492	1075.99	1289.77	2182.62	1434.35	58.8759	207.465	141.14	123.503	101.893	165.833
Ta.10486.2.S1_a_at	Os08g02050.1	transposon protein, putative, unclassified, expressed	Putative CRK1 protein [Oryza sativa (japonica cultivar-group)]	CA619899	n	n	n	up	n	untreated	346.5	398.961	271.482	247.703	204.592	197.841	24.3368	89.6613	9.15881	8.64942	25.4023	43.1938
Ta.10486.2.S1_a_at	Os08g02050.1	transposon protein, putative, unclassified, expressed	Putative CRK1 protein [Oryza sativa (japonica cultivar-group)]	CA619899	n	n	n	up	n	treated	308.937	479.595	343.18	395.772	640.554	403.605	26.3914	70.7941	20.9478	31.9883	52.6046	46.1291
Ta.10488.1.A1_at	Os01g13100.3	nucleic acid binding protein, putative, expressed	NA	TA96772_4565	n	up	n	up	n	untreated	90.2222	31.2222	36.7849	35.9355	44.5786	43.255	11.4796	4.33978	3.41192	5.30682	4.85629	14.6612
Ta.10488.1.A1_at	Os01g13100.3	nucleic acid binding protein, putative, expressed	NA	TA96772_4565	n	up	n	up	n	treated	92.7768	57.2649	82.8785	60.3173	123.334	38.9664	20.4936	7.72513	5.32569	2.79743	5.61685	5.65423
Ta.10490.1.S1_at	Os08g42540.1	ubiquitin thioesterase otubain-like protein, putative, expressed	Putative ubiquitin-specific protease otubain 1 [Oryza sativa (japonica cultivar-group)]	TA73827_4565	n	n	n	up	n	untreated	1974.45	2044.21	1588.45	1672.8	1807.91	1588.64	148.469	135.223	117.547	86.4505	99.7491	34.4202
Ta.10490.1.S1_at	Os08g42540.1	ubiquitin thioesterase otubain-like protein, putative, expressed	Putative ubiquitin-specific protease otubain 1 [Oryza sativa (japonica cultivar-group)]	TA73827_4565	n	n	n	up	n	treated	1874.33	2306.58	1592.55	1825.3	3691.76	2901.62	149.469	468.217	241.455	40.3804	329.481	255.027
Ta.10491.1.A1_at	Os05g12490.1	integral membrane protein like, putative, expressed	Putative transmembrane protein [Oryza sativa (Rice)]	TA99653_4565	n	n	n	up	n	untreated	83.138	110.24	95.7771	137.155	108.081	85.7592	8.32107	25.6209	4.41942	20.8079	13.1133	16.4583
Ta.10491.1.A1_at	Os05g12490.1	integral membrane protein like, putative, expressed	Putative transmembrane protein [Oryza sativa (Rice)]	TA99653_4565	n	n	n	up	n	treated	70.6878	109.161	97.907	114.662	229.569	131.559	11.5752	8.22999	15.894	9.79052	35.2526	6.70229
Ta.10492.1.S1_at	Os05g41900.1	protein translation factor SUI1, putative, expressed	Protein translation factor SUI1 homolog [Salix bakko (Japanese willow)]	TA62214_4565	n	n	n	up	up	untreated	4849.34	3222.83	9575.36	11026.4	4891.4	5691.35	581.146	534.073	586.493	745.627	381.736	719.788
Ta.10492.1.S1_at	Os05g41900.1	protein translation factor SUI1, putative, expressed	Protein translation factor SUI1 homolog [Salix bakko (Japanese willow)]	TA62214_4565	n	n	n	up	up	treated	4897.72	6607.55	10353.2	12312	17849.4	14799	254.105	6195.83	758.6	324.679	1438.96	1171.88
Ta.105.1.S1_at	Os01g04040.1	Bowman-Birk type wound-induced proteinase inhibitor WIP1 precursor, putative	wali3 protein	TA52450_4565	n	n	n	up	n	untreated	84.5725	118.825	115.028	122.06	109.939	109.539	5.61108	12.9601	21.0462	25.4741	14.255	10.9131
Ta.105.1.S1_at	Os01g04040.1	Bowman-Birk type wound-induced proteinase inhibitor WIP1 precursor, putative	wali3 protein	TA52450_4565	n	n	n	up	n	treated	98.426	200.848	121.836	142.182	619.241	210.29	7.92672	89.4533	12.7349	5.30154	202.2	56.2771
Ta.1050.1.S1_at	Os09g27830.1	OsPDIL2-3 - Oryza sativa protein disulfide isomerase, expressed	Hypothetical protein OJ1163_C07.26-2 [Oryza sativa (japonica cultivar-group)]	TA67033_4565	n	up	up	up	n	untreated	554.195	4291.79	1338.18	998.524	1062.1	1670.74	144.991	506.335	227.68	153.975	263.601	1214.91
Ta.1050.1.S1_at	Os09g27830.1	OsPDIL2-3 - Oryza sativa protein disulfide isomerase, expressed	Hypothetical protein OJ1163_C07.26-2 [Oryza sativa (japonica cultivar-group)]	TA67033_4565	n	up	up	up	n	treated	475.327	4819.27	5538.41	5628.21	3545.93	1731.68	54.2289	857.56	580.729	95.3972	406.72	343.733
Ta.10508.2.S1_a_at	Os04g40950.1	glyceraldehyde-3-phosphate dehydrogenase, cytosolic 3, putative, expressed	Glyceraldehyde-3-phosphate dehydrogenase, cytosolic [Ranunculus acris (Meadow buttercup)]	TA58239_4565	n	n	n	down	n	untreated	931.601	882.017	1219.9	1660.51	1177.25	767.357	175.507	156.113	290.479	288.141	165.404	89.2112
Ta.10508.2.S1_a_at	Os04g40950.1	glyceraldehyde-3-phosphate dehydrogenase, cytosolic 3, putative, expressed	Glyceraldehyde-3-phosphate dehydrogenase, cytosolic [Ranunculus acris (Meadow buttercup)]	TA58239_4565	n	n	n	down	n	treated	797.859	1102.44	921.2	1110.76	410.258	558.265	127.56	187.97	132.978	218.444	11.7124	37.5315
Ta.10515.1.S1_at	Os04g44910.1	protein kinase, putative, expressed	OSJNBa0081C01.17 protein [Oryza sativa (japonica cultivar-group)]	CK210250	n	up	up	up	up	untreated	130.788	182.581	134.638	146.031	107.421	109.358	20.2901	11.2942	8.50034	9.17722	20.7032	17.3781
Ta.10515.1.S1_at	Os04g44910.1	protein kinase, putative, expressed	OSJNBa0081C01.17 protein [Oryza sativa (japonica cultivar-group)]	CK210250	n	up	up	up	up	treated	119.632	411.606	278.296	513.161	1313.83	486.634	18.5337	167.771	48.1413	164.645	188.586	54.8552
Ta.10517.1.A1_at	Os01g65070.1	embryogenesis-associated protein EMB8, putative, expressed	F23M19.1 protein [Arabidopsis thaliana (Mouse-ear cress)]	TA89283_4565	n	n	up	up	n	untreated	100.483	122.099	109.267	85.2056	129.329	143.026	16.9005	15.6633	8.49918	11.2857	5.71816	20.6202
Ta.10517.1.A1_at	Os01g65070.1	embryogenesis-associated protein EMB8, putative, expressed	F23M19.1 protein [Arabidopsis thaliana (Mouse-ear cress)]	TA89283_4565	n	n	up	up	n	treated	96.9311	151.818	175.766	180.682	335.083	256.357	14.8277	32.466	4.68405	8.34059	20.9133	23.5049
Ta.10520.1.S1_at	Os01g40070.1	expressed protein	Hypothetical protein B1097D05.32 [Oryza sativa (japonica cultivar-group)]	TA73639_4565	n	n	up	up	n	untreated	1433.45	464.333	216.563	135.619	146.625	590.221	439.709	220.39	54.4528	12.1046	52.7757	455.477
Ta.10520.1.S1_at	Os01g40070.1	expressed protein	Hypothetical protein B1097D05.32 [Oryza sativa (japonica cultivar-group)]	TA73639_4565	n	n	up	up	n	treated	1639.04	526.059	339.421	501.251	2127.34	934.389	874.681	189.453	54.9987	50.2538	127.612	71.2025
Ta.10520.2.S1_a_at	Os01g40070.1	expressed protein	Hypothetical protein B1097D05.32 [Oryza sativa (japonica cultivar-group)]	TA73641_4565	n	n	n	up	n	untreated	690.391	241.077	163.688	130.012	170.339	313.442	235.457	70.9454	15.3622	24.0192	17.3671	78.8647
Ta.10520.2.S1_a_at	Os01g40070.1	expressed protein	Hypothetical protein B1097D05.32 [Oryza sativa (japonica cultivar-group)]	TA73641_4565	n	n	n	up	n	treated	761.799	256.35	221.029	242.464	958.353	410.954	353.628	74.3558	34.6452	56.0026	50.5798	37.2845
Ta.10520.2.S1_x_at	Os01g40070.1	expressed protein	Hypothetical protein B1097D05.32 [Oryza sativa (japonica cultivar-group)]	CA723151	n	n	n	up	n	untreated	248.203	94.6459	68.6463	45.2208	49.5816	111.386	92.5951	33.9517	9.06299	7.22408	15.2928	34.7787
Ta.10520.2.S1_x_at	Os01g40070.1	expressed protein	Hypothetical protein B1097D05.32 [Oryza sativa (japonica cultivar-group)]	CA723151	n	n	n	up	n	treated	263.34	92.1233	69.9278	89.7602	328.464	141.259	133.921	29.8652	14.1705	22.9185	21.3883	23.0037
Ta.10521.2.S1_at	Os08g43300.1	SAY1, putative, expressed	Hypothetical protein OJ1323_A06.23 [Oryza sativa (japonica cultivar-group)]	BQ171091	n	n	n	n	up	untreated	459.077	464.189	650.298	516.763	522.842	566.735	24.5502	16.3077	46.2409	70.3862	22.369	27.8133
Ta.10521.2.S1_at	Os08g43300.1	SAY1, putative, expressed	Hypothetical protein OJ1323_A06.23 [Oryza sativa (japonica cultivar-group)]	BQ171091	n	n	n	n	up	treated	474.423	455.414	450.262	432.102	969.55	1131.09	55.8545	18.192	101.333	58.2444	169.231	137.694
Ta.10521.2.S1_x_at	Os08g43300.1	SAY1, putative, expressed	Hypothetical protein OJ1323_A06.23 [Oryza sativa (japonica cultivar-group)]	BQ171091	n	n	n	n	up	untreated	461.669	478.94	633.277	539.694	541.203	553.751	36.4602	26.8028	61.1976	52.7938	39.4625	19.2101
Ta.10521.2.S1_x_at	Os08g43300.1	SAY1, putative, expressed	Hypothetical protein OJ1323_A06.23 [Oryza sativa (japonica cultivar-group)]	BQ171091	n	n	n	n	up	treated	432.834	454.469	443.466	412.576	918.439	1146.18	18.5962	44.7169	108.541	38.3999	115.622	60.4802
Ta.10534.1.S1_a_at	Os10g28020.1	acylamino-acid-releasing enzyme, putative, expressed	Prolyl oligopeptidase family, putative [Oryza sativa (japonica cultivar-group)]	TA56355_4565	n	n	n	down	n	untreated	977.409	860.967	1766.96	1466.94	1173.9	1191.63	67.3525	35.3837	47.0915	108.444	70.2634	169.148
Ta.10534.1.S1_a_at	Os10g28020.1	acylamino-acid-releasing enzyme, putative, expressed	Prolyl oligopeptidase family, putative [Oryza sativa (japonica cultivar-group)]	TA56355_4565	n	n	n	down	n	treated	940.581	826.403	1463.01	1040.69	549.457	1114.19	67.7517	157.164	15.6077	57.2958	32.0729	32.4951
Ta.10537.2.A1_at	Os03g46610.1	ATP-dependent RNA helicase DDX47, putative, expressed	Putative RNA helicase [Oryza sativa (japonica cultivar-group)]	BQ804919	n	n	n	down	n	untreated	106.706	137.806	197.654	274.542	174.724	185.302	24.728	52.7319	30.8251	28.8954	25.9792	27.9462
Ta.10537.2.A1_at	Os03g46610.1	ATP-dependent RNA helicase DDX47, putative, expressed	Putative RNA helicase [Oryza sativa (japonica cultivar-group)]	BQ804919	n	n	n	down	n	treated	89.5039	180.454	226.799	306.036	72.9237	159.094	6.94513	114.337	30.0765	26.5463	17.6603	30.2007
Ta.10538.1.A1_at	Os06g20320.1	trigger factor-like protein, putative, expressed	AT5g55220/MCO15_17 [Arabidopsis thaliana (Mouse-ear cress)]	TA61689_4565	n	n	n	down	n	untreated	607.754	327.503	496.422	873.987	386.27	684.298	111.463	105.586	123.557	344.433	71.7839	342.933
Ta.10538.1.A1_at	Os06g20320.1	trigger factor-like protein, putative, expressed	AT5g55220/MCO15_17 [Arabidopsis thaliana (Mouse-ear cress)]	TA61689_4565	n	n	n	down	n	treated	552.145	338.698	401.369	565.361	66.6153	137.557	85.5841	136.676	105.413	103.369	8.70301	27.0131
Ta.10542.1.S1_a_at	Os04g38410.1	chlorophyll a-b binding protein CP24, chloroplast precursor, putative, expressed	OSJNBa0036B21.6 protein [Oryza sativa (japonica cultivar-group)]	TA61430_4565	n	n	n	up	up	untreated	379.993	650.455	652.866	527.303	491.537	398.228	41.3014	70.2218	170.39	107.001	38.5422	149.785
Ta.10542.1.S1_a_at	Os04g38410.1	chlorophyll a-b binding protein CP24, chloroplast precursor, putative, expressed	OSJNBa0036B21.6 protein [Oryza sativa (japonica cultivar-group)]	TA61430_4565	n	n	n	up	up	treated	335.81	850.741	701.808	586.738	1254.95	1759.89	22.0221	229.413	133.933	22.0002	171.815	74.5461
Ta.10549.1.A1_at	Os04g51160.1	transposon protein, putative, unclassified, expressed	Alternative oxidase AOX3 [Zea mays (Maize)]	TA80245_4565	n	up	up	up	n	untreated	1113.52	151.171	244.689	119.954	133.027	1256.63	637.674	54.6802	21.3339	16.85	41.2177	1948.89
Ta.10549.1.A1_at	Os04g51160.1	transposon protein, putative, unclassified, expressed	Alternative oxidase AOX3 [Zea mays (Maize)]	TA80245_4565	n	up	up	up	n	treated	886.927	599.624	679.147	697.287	1531.45	528.948	312.895	216.759	216.249	130.832	306.075	116.481
Ta.10549.1.A1_x_at	Os04g51160.1	transposon protein, putative, unclassified, expressed	Alternative oxidase AOX3 [Zea mays (Maize)]	TA80245_4565	n	up	up	up	n	untreated	1535.56	236.511	327.411	155.611	179.58	1664.46	892.375	72.1331	51.7535	15.2825	27.7643	2421.77
Ta.10549.1.A1_x_at	Os04g51160.1	transposon protein, putative, unclassified, expressed	Alternative oxidase AOX3 [Zea mays (Maize)]	TA80245_4565	n	up	up	up	n	treated	1142.7	815.928	869.083	884.71	1830.6	646.734	246.99	373.524	257.666	221.177	124.254	176.372
Ta.10549.2.A1_at	Os04g51150.1	transposon protein, putative, unclassified, expressed	Alternative oxidase [Oryza sativa (Rice)]	BQ165963	n	n	up	up	n	untreated	1182.97	77.5834	236.13	77.4091	109.966	550.408	548.507	4.11061	80.4394	2.55347	28.9885	711.924
Ta.10549.2.A1_at	Os04g51150.1	transposon protein, putative, unclassified, expressed	Alternative oxidase [Oryza sativa (Rice)]	BQ165963	n	n	up	up	n	treated	973.938	380.858	430.834	325.813	875.628	383.213	176.578	222.905	154.415	61.8848	99.4733	120.275
Ta.1055.1.S1_at	Os06g51150.1	catalase isozyme B, putative, expressed	Catalase 1 [Zantedeschia aethiopica (White calla lily)]	TA51984_4565	n	n	n	n	up	untreated	753.709	1010.88	1398.93	1667.09	1084.85	868.935	102.389	106.599	150.591	279.256	106.429	203.298
Ta.1055.1.S1_at	Os06g51150.1	catalase isozyme B, putative, expressed	Catalase 1 [Zantedeschia aethiopica (White calla lily)]	TA51984_4565	n	n	n	n	up	treated	761.129	1399.34	1267.6	1544.8	1900.28	2271.14	96.0479	219.146	206.84	76.9073	262.634	135.272
Ta.1055.1.S1_x_at	Os06g51150.1	catalase isozyme B, putative, expressed	Catalase 1 [Zantedeschia aethiopica (White calla lily)]	TA51984_4565	n	n	n	n	up	untreated	1149.01	1498.37	2096.03	2479.2	1608.11	1293.82	124.782	170.231	282.457	359.645	160.442	381.612
Ta.1055.1.S1_x_at	Os06g51150.1	catalase isozyme B, putative, expressed	Catalase 1 [Zantedeschia aethiopica (White calla lily)]	TA51984_4565	n	n	n	n	up	treated	1129.13	1982.69	1854.29	2284.5	2871.9	3303.76	153.911	251.852	324.204	170.349	430.058	153.711
Ta.1055.2.S1_at	Os06g51150.1	catalase isozyme B, putative, expressed	Catalase 1 [Hordeum vulgare (Barley)]	TA52336_4565	n	n	n	n	up	untreated	546.509	455.276	965.221	1473.11	752.915	542.191	38.9066	70.3976	229.644	152.968	108.051	218.299
Ta.1055.2.S1_at	Os06g51150.1	catalase isozyme B, putative, expressed	Catalase 1 [Hordeum vulgare (Barley)]	TA52336_4565	n	n	n	n	up	treated	543.93	806.131	766.295	1118.67	1593.18	1719.27	40.528	328.061	209.809	133.932	351.788	111.412
Ta.1055.2.S1_x_at	Os06g51150.1	catalase isozyme B, putative, expressed	Catalase 1 [Hordeum vulgare (Barley)]	TA52336_4565	n	n	n	up	n	untreated	1043.38	918.101	1905.16	2600.26	1471.77	1116.93	75.7931	173.755	406.672	522.049	208.015	506.805
Ta.1055.2.S1_x_at	Os06g51150.1	catalase isozyme B, putative, expressed	Catalase 1 [Hordeum vulgare (Barley)]	TA52336_4565	n	n	n	up	n	treated	1054.14	1560.7	1524.53	2092.57	2936.19	3422.04	105.517	610.556	325.868	292.687	499.2	217.255
Ta.10555.1.A1_at	Os11g11780.1	serine/threonine protein kinase, putative, expressed	Stem rust resistance protein, putative [Oryza sativa (japonica cultivar-group)]	CD871769	n	up	up	up	up	untreated	107.197	109.469	111.246	94.7087	92.0732	140.347	12.1989	9.60548	21.8013	16.6824	20.3051	62.4196
Ta.10555.1.A1_at	Os11g11780.1	serine/threonine protein kinase, putative, expressed	Stem rust resistance protein, putative [Oryza sativa (japonica cultivar-group)]	CD871769	n	up	up	up	up	treated	100.883	252.19	248.427	553.451	1529.6	1101.05	10.338	261.518	44.0145	24.2745	71.3683	154.865
Ta.1057.1.A1_at	Os01g67630.1	peptide transporter PTR2, putative, expressed	Putative peptide transport protein [Oryza sativa (japonica cultivar-group)]	TA92207_4565	n	n	down	down	down	untreated	296.043	1152.76	1390.38	1419.03	689.731	879.133	50.155	135.732	104.62	205.766	42.2241	152.979
Ta.1057.1.A1_at	Os01g67630.1	peptide transporter PTR2, putative, expressed	Putative peptide transport protein [Oryza sativa (japonica cultivar-group)]	TA92207_4565	n	n	down	down	down	treated	237.912	829.648	954.012	670.12	88.0402	439.109	16.5962	169.096	49.6372	61.8231	5.43689	38.0226
Ta.1057.1.A1_x_at	Os01g67630.1	peptide transporter PTR2, putative, expressed	Putative peptide transport protein [Oryza sativa (japonica cultivar-group)]	TA92207_4565	n	n	down	down	n	untreated	432.999	1640.51	1939.55	1956.11	973.128	1240.44	90.0296	220.748	115.719	352.79	65.2362	269.97
Ta.1057.1.A1_x_at	Os01g67630.1	peptide transporter PTR2, putative, expressed	Putative peptide transport protein [Oryza sativa (japonica cultivar-group)]	TA92207_4565	n	n	down	down	n	treated	330.652	1153.78	1373.67	954.298	130.945	678.009	68.2458	176.675	26.0121	96.1352	17.2256	143.507
Ta.10575.1.A1_at	Os11g43510.1	lipase precursor, putative, expressed	Triacylglycerol lipase [Oryza sativa (japonica cultivar-group)]	TA79602_4565	n	n	n	up	up	untreated	425.971	567.912	927.942	693.215	641.03	544.304	63.197	94.0299	100.535	74.1183	82.7447	146.814
Ta.10575.1.A1_at	Os11g43510.1	lipase precursor, putative, expressed	Triacylglycerol lipase [Oryza sativa (japonica cultivar-group)]	TA79602_4565	n	n	n	up	up	treated	419.613	618.157	672.004	589.538	1494.26	1401.17	53.8215	19.0886	145.327	44.8497	186.852	101.472
Ta.10577.1.S1_at	Os04g42100.1	peroxidase 18 precursor, putative, expressed	Hypothetical protein F27K19_190 [Arabidopsis thaliana (Mouse-ear cress)]	TA101607_4565	n	n	n	down	down	untreated	6912.57	4040.04	3011.47	4849.15	7023.61	7029.83	291.104	107.321	741.609	1404.84	468.277	2176.71
Ta.10577.1.S1_at	Os04g42100.1	peroxidase 18 precursor, putative, expressed	Hypothetical protein F27K19_190 [Arabidopsis thaliana (Mouse-ear cress)]	TA101607_4565	n	n	n	down	down	treated	6886.17	2625.36	2429.9	2905.29	171.892	353.495	385.937	155.11	1120.5	637.366	95.4986	153.172
Ta.10582.1.S1_x_at	Os08g44400.1	glutathione S-transferase, N-terminal domain containing protein, expressed	Putative auxin-regulated protein [Oryza sativa (japonica cultivar-group)]	TA78379_4565	n	n	n	down	down	untreated	730.281	535.511	534.102	718.891	598.644	621.639	27.2432	52.2514	47.3868	159.917	92.3449	183.779
Ta.10582.1.S1_x_at	Os08g44400.1	glutathione S-transferase, N-terminal domain containing protein, expressed	Putative auxin-regulated protein [Oryza sativa (japonica cultivar-group)]	TA78379_4565	n	n	n	down	down	treated	744.82	468.626	558.532	586.293	130.21	211.291	94.3721	75.9129	141.588	131.516	25.5417	32.7226
Ta.10582.2.S1_a_at	Os08g44400.1	glutathione S-transferase, N-terminal domain containing protein, expressed	Putative auxin-regulated protein [Oryza sativa (japonica cultivar-group)]	TA78380_4565	n	n	n	down	n	untreated	889.386	598.556	549.149	878.522	701.657	745.554	67.7332	56.9131	75.8929	171.296	107.393	247.385
Ta.10582.2.S1_a_at	Os08g44400.1	glutathione S-transferase, N-terminal domain containing protein, expressed	Putative auxin-regulated protein [Oryza sativa (japonica cultivar-group)]	TA78380_4565	n	n	n	down	n	treated	856.533	553.73	611.856	717.651	173.646	275.484	40.3004	71.9857	183.124	181.782	33.5101	40.6955
Ta.10583.1.A1_at	Os01g27520.1	asparaginyl-tRNA synthetase, cytoplasmic 3, putative, expressed	Asparaginyl-tRNA synthetase, putative [Brassica oleracea (Wild cabbage)]	BQ166045	n	n	n	up	n	untreated	14.0866	13.9183	14.4252	14.4214	13.8971	14.26	1.04616	2.55025	2.03818	1.29075	1.13377	0.971974
Ta.10583.1.A1_at	Os01g27520.1	asparaginyl-tRNA synthetase, cytoplasmic 3, putative, expressed	Asparaginyl-tRNA synthetase, putative [Brassica oleracea (Wild cabbage)]	BQ166045	n	n	n	up	n	treated	14.0263	15.9527	14.9752	20.3565	62.9492	45.8472	0.63581	1.79896	0.692113	1.68608	3.62246	13.4642
Ta.10590.1.A1_at	Os06g35900.1	brassinazole-resistant 1 protein, putative, expressed	Hypothetical protein P0489A05.32 [Oryza sativa (japonica cultivar-group)]	TA93920_4565	n	n	n	up	n	untreated	213.706	315.602	184.328	147.789	188.266	159.708	32.4393	38.8878	33.8526	17.7472	2.39198	10.9606
Ta.10590.1.A1_at	Os06g35900.1	brassinazole-resistant 1 protein, putative, expressed	Hypothetical protein P0489A05.32 [Oryza sativa (japonica cultivar-group)]	TA93920_4565	n	n	n	up	n	treated	189.699	274.008	170.14	148.334	378.099	280.627	25.0394	111.454	17.7211	6.67693	34.7607	21.6597
Ta.10591.1.S1_at	Os02g45540.1	dTDP-4-dehydrorhamnose reductase, putative, expressed	F16P17.17 protein [Arabidopsis thaliana (Mouse-ear cress)]	TA78562_4565	n	n	n	down	down	untreated	417.44	625.486	1096.29	945.986	560.326	517.01	27.8679	54.537	125.138	88.3586	58.6519	63.6438
Ta.10591.1.S1_at	Os02g45540.1	dTDP-4-dehydrorhamnose reductase, putative, expressed	F16P17.17 protein [Arabidopsis thaliana (Mouse-ear cress)]	TA78562_4565	n	n	n	down	down	treated	386.954	793.912	1007.15	802.096	256.158	227.438	20.804	110.968	61.923	99.2818	28.7621	14.3397
Ta.10591.3.S1_a_at	Os02g45540.1	dTDP-4-dehydrorhamnose reductase, putative, expressed	F16P17.17 protein [Arabidopsis thaliana (Mouse-ear cress)]	TA78562_4565	n	n	n	down	down	untreated	318.626	485.826	802.327	782.044	391.741	344.723	37.7795	58.9797	72.118	151.574	61.0392	45.7502
Ta.10591.3.S1_a_at	Os02g45540.1	dTDP-4-dehydrorhamnose reductase, putative, expressed	F16P17.17 protein [Arabidopsis thaliana (Mouse-ear cress)]	TA78562_4565	n	n	n	down	down	treated	282.656	545.971	881.394	652.304	189.554	167.96	26.5433	89.6446	133.27	49.3292	15.6408	9.64595
Ta.10592.2.S1_at	Os01g37870.3	expressed protein	Putative PPR protein [Oryza sativa (japonica cultivar-group)]	CA600998	n	n	down	down	n	untreated	192.451	98.6545	330.67	337.768	163.79	169.994	36.3188	22.3044	70.6387	53.9344	20.0102	44.7703
Ta.10592.2.S1_at	Os01g37870.3	expressed protein	Putative PPR protein [Oryza sativa (japonica cultivar-group)]	CA600998	n	n	down	down	n	treated	168.15	98.3027	207.141	114.822	80.304	93.3578	23.9528	10.5436	43.0463	7.70808	19.3373	6.66144
Ta.10595.1.S1_at	Os09g10750.1	rhodanese family protein, putative, expressed	Rhodanese-like family protein [Arabidopsis thaliana (Mouse-ear cress)]	BQ170316	n	n	down	down	down	untreated	2560.02	1462.02	2719.65	2731.1	2264.35	2631.36	293.099	164.807	447.774	459.499	76.3619	472.762
Ta.10595.1.S1_at	Os09g10750.1	rhodanese family protein, putative, expressed	Rhodanese-like family protein [Arabidopsis thaliana (Mouse-ear cress)]	BQ170316	n	n	down	down	down	treated	2546.54	1031.61	1741.33	1355.27	90.7379	223.82	336.555	229.294	376.928	174.639	20.6265	44.5858
Ta.10597.1.S1_at	Os04g57410.1	methylthioribose kinase, putative, expressed	H0818H01.11 protein [Oryza sativa (Rice)]	TA109171_4565	n	n	n	down	n	untreated	332.448	279.405	217.992	339.946	436.17	378.398	48.1641	8.30717	34.3219	19.5676	39.5715	91.4478
Ta.10597.1.S1_at	Os04g57410.1	methylthioribose kinase, putative, expressed	H0818H01.11 protein [Oryza sativa (Rice)]	TA109171_4565	n	n	n	down	n	treated	303.773	216.099	153.079	228.755	140.394	219.109	28.0573	9.73585	8.93575	6.8812	11.9053	29.8831
Ta.1060.2.S1_a_at	Os12g40780.1	ankyrin-2, putative, expressed	Ankyrin-like protein-like protein [Oryza sativa (japonica cultivar-group)]	TA68859_4565	n	n	n	down	down	untreated	442.23	740.72	385.467	358.145	520.091	625.226	56.9286	103.192	56.3564	52.8398	48.5191	126.787
Ta.1060.2.S1_a_at	Os12g40780.1	ankyrin-2, putative, expressed	Ankyrin-like protein-like protein [Oryza sativa (japonica cultivar-group)]	TA68859_4565	n	n	n	down	down	treated	397.183	500.781	325.317	223.792	118.848	176.79	18.9214	256.905	60.9583	17.4182	20.624	32.489
Ta.10613.1.S1_x_at	Os01g73250.1	bundle sheath cell specific protein 1, putative, expressed	NA	TA52424_4565	n	n	n	down	down	untreated	1216.36	1030.71	2019.3	1927.6	2396.21	1786.67	241.865	101.346	696.584	697.069	1463.63	965.299
Ta.10613.1.S1_x_at	Os01g73250.1	bundle sheath cell specific protein 1, putative, expressed	NA	TA52424_4565	n	n	n	down	down	treated	1444.31	1050.05	1044.42	1146.47	509.524	204.294	337.817	146.025	131.305	195.543	38.2908	42.224
Ta.10614.1.S1_at	Os04g37950.1	ubiquitin carboxyl-terminal hydrolase 4, putative, expressed	Putative ubiquitin-specific protease 3 [Oryza sativa (japonica cultivar-group)]	TA109112_4565	n	n	n	up	n	untreated	175.088	241.045	218.435	225.007	161.14	147.362	8.55468	43.7014	6.26893	9.33385	8.00616	46.3764
Ta.10614.1.S1_at	Os04g37950.1	ubiquitin carboxyl-terminal hydrolase 4, putative, expressed	Putative ubiquitin-specific protease 3 [Oryza sativa (japonica cultivar-group)]	TA109112_4565	n	n	n	up	n	treated	166.088	308.24	248.979	298.687	495.887	339.241	8.30369	26.4024	14.6159	33.4167	46.4659	13.5214
Ta.10616.1.A1_at	Os06g51410.1	protease 2, putative, expressed	Putative oligopeptidase B [Oryza sativa (japonica cultivar-group)]	TA90290_4565	n	n	n	up	n	untreated	48.6754	48.194	91.2004	119.464	51.9161	36.05	18.0377	7.9266	12.6504	20.812	12.1373	16.1102
Ta.10616.1.A1_at	Os06g51410.1	protease 2, putative, expressed	Putative oligopeptidase B [Oryza sativa (japonica cultivar-group)]	TA90290_4565	n	n	n	up	n	treated	40.1535	72.628	100.678	106.499	132.276	69.0776	5.34469	46.2786	28.2574	14.6612	25.5901	10.5424
Ta.10618.1.S1_at	Os02g48860.1	aspartic proteinase nepenthesin-2 precursor, putative, expressed	Putative chloroplast nucleoid DNA-binding protein cnd41 [Oryza sativa (japonica cultivar-group)]	TA99360_4565	n	n	n	up	up	untreated	140.585	190.603	176.297	149.39	120.733	133.545	17.7787	56.0231	14.1707	26.4942	15.1549	21.4032
Ta.10618.1.S1_at	Os02g48860.1	aspartic proteinase nepenthesin-2 precursor, putative, expressed	Putative chloroplast nucleoid DNA-binding protein cnd41 [Oryza sativa (japonica cultivar-group)]	TA99360_4565	n	n	n	up	up	treated	124.097	248.099	205.755	290.323	549.361	599.002	29.1225	39.9507	21.3184	24.0578	17.2501	104.53
Ta.10624.1.S1_at	Os10g35570.1	expressed protein	Hypothetical protein OSJNBa0078O01.3 [Oryza sativa (japonica cultivar-group)]	TA91960_4565	n	n	n	up	n	untreated	297.633	506.082	351.669	360.233	315.709	311.242	13.0269	58.4549	9.6406	10.0679	34.8265	113.783
Ta.10624.1.S1_at	Os10g35570.1	expressed protein	Hypothetical protein OSJNBa0078O01.3 [Oryza sativa (japonica cultivar-group)]	TA91960_4565	n	n	n	up	n	treated	260.641	562.908	450.809	616.188	1062.94	719.421	9.25408	79.3333	25.4058	4.31719	38.3563	59.8106
Ta.10633.1.S1_at	Os10g26140.2	colon cancer-associated protein Mic1-like containing protein, expressed	Colon cancer-associated protein Mic1, putative [Oryza sativa (japonica cultivar-group)]	TA77369_4565	n	n	n	up	n	untreated	559.782	817.034	660.123	663.78	690.886	637.315	54.2464	91.4989	49.9985	37.6484	42.6715	85.4453
Ta.10633.1.S1_at	Os10g26140.2	colon cancer-associated protein Mic1-like containing protein, expressed	Colon cancer-associated protein Mic1, putative [Oryza sativa (japonica cultivar-group)]	TA77369_4565	n	n	n	up	n	treated	505.538	958.373	825.695	992.859	1441.28	1193.15	9.47001	71.273	56.1735	24.6766	61.6498	27.6794
Ta.10633.2.S1_x_at	Os10g26140.2	colon cancer-associated protein Mic1-like containing protein, expressed	Colon cancer-associated protein Mic1, putative [Oryza sativa (japonica cultivar-group)]	TA77371_4565	n	n	n	up	up	untreated	276.918	358.33	315.651	328.722	317.211	260.302	16.9897	45.0534	34.9014	18.6576	20.5835	9.08179
Ta.10633.2.S1_x_at	Os10g26140.2	colon cancer-associated protein Mic1-like containing protein, expressed	Colon cancer-associated protein Mic1, putative [Oryza sativa (japonica cultivar-group)]	TA77371_4565	n	n	n	up	up	treated	250.73	438.217	394.988	441.823	641.427	532.344	23.906	39.4917	37.7618	26.7515	39.2543	14.4427
Ta.10642.1.S1_at	Os02g01510.1	L-lactate dehydrogenase A, putative, expressed	NA	CA612878	n	n	n	down	n	untreated	212.991	211.427	197.081	232.139	190.7	201.378	52.5751	13.7221	26.3129	35.1384	12.9847	23.5335
Ta.10642.1.S1_at	Os02g01510.1	L-lactate dehydrogenase A, putative, expressed	NA	CA612878	n	n	n	down	n	treated	204.278	183.887	168.79	153.653	93.2092	149.528	26.2726	41.179	21.1181	15.358	4.90662	11.6829
Ta.10642.1.S1_x_at	Os02g01510.1	L-lactate dehydrogenase A, putative, expressed	Lactate dehydrogenase [Oryza sativa (japonica cultivar-group)]	TA93083_4565	n	n	n	down	n	treated	234.333	216.052	188.601	175.111	109.047	169.931	32.5683	52.8792	24.0144	7.80888	7.59618	9.53409
Ta.10642.1.S1_x_at	Os02g01510.1	L-lactate dehydrogenase A, putative, expressed	Lactate dehydrogenase [Oryza sativa (japonica cultivar-group)]	TA93083_4565	n	n	n	down	n	untreated	234.231	242.944	244.204	273.036	235.022	249.621	39.7027	27.9878	29.6356	39.4586	3.52432	18.8949
Ta.10654.1.A1_at	Os01g50610.1	jasmonate O-methyltransferase, putative, expressed	putative S-adenosyl-L-methionine:salicylic acid carboxyl methyltransferase [Oryza sativa (japonica cultivar-group)]	BQ166201	n	n	n	up	n	untreated	96.7872	141.996	84.0352	71.0685	116.109	100.736	18.63	30.0227	0.827834	8.17321	8.27543	12.1931
Ta.10654.1.A1_at	Os01g50610.1	jasmonate O-methyltransferase, putative, expressed	putative S-adenosyl-L-methionine:salicylic acid carboxyl methyltransferase [Oryza sativa (japonica cultivar-group)]	BQ166201	n	n	n	up	n	treated	82.4416	126.042	86.3373	79.9708	280.929	169.014	10.2115	26.0022	4.66644	4.17427	45.575	125.952
Ta.10667.1.S1_at	Os03g58330.1	BHLH transcription factor, putative, expressed	Hypothetical protein OSJNBa0094F01.11 [Oryza sativa (japonica cultivar-group)]	TA85474_4565	n	n	n	down	n	untreated	889.573	717.691	749.675	875.129	962.923	888.798	89.4351	58.893	31.4519	126.829	1.31867	59.1712
Ta.10667.1.S1_at	Os03g58330.1	BHLH transcription factor, putative, expressed	Hypothetical protein OSJNBa0094F01.11 [Oryza sativa (japonica cultivar-group)]	TA85474_4565	n	n	n	down	n	treated	836.561	616.912	714.793	720.825	352.526	580.655	18.5981	78.7738	134.185	49.0337	52.6845	55.6531
Ta.10667.3.S1_a_at	Os03g58330.1	BHLH transcription factor, putative, expressed	Hypothetical protein OSJNBa0094F01.11 [Oryza sativa (japonica cultivar-group)]	TA85474_4565	n	n	n	down	n	untreated	355.947	252.6	297.109	349.251	386.71	351.875	5.58439	13.853	24.3286	56.4496	9.04384	38.4187
Ta.10667.3.S1_a_at	Os03g58330.1	BHLH transcription factor, putative, expressed	Hypothetical protein OSJNBa0094F01.11 [Oryza sativa (japonica cultivar-group)]	TA85474_4565	n	n	n	down	n	treated	321.392	235.025	338.961	266.786	132.79	209.908	14.183	19.391	101.682	33.6442	14.3768	15.2573
Ta.10671.1.A1_at	Os05g02120.1	carboxylic ester hydrolase, putative, expressed	P0459B04.9 [Oryza sativa (japonica cultivar-group)]	BQ166239	n	n	n	down	n	untreated	44.7468	65.5226	127.245	151.234	86.5076	69.9575	11.1786	0.732983	15.2641	7.97209	14.3968	11.5602
Ta.10671.1.A1_at	Os05g02120.1	carboxylic ester hydrolase, putative, expressed	P0459B04.9 [Oryza sativa (japonica cultivar-group)]	BQ166239	n	n	n	down	n	treated	47.9516	80.6489	110.962	110.163	33.1556	60.4423	11.0343	36.8684	9.90358	7.22087	8.30795	7.28992
Ta.10679.1.A1_a_at	Os06g24070.1	transcription factor ZmGLK1, putative, expressed	NA	CA696249	n	n	down	down	down	untreated	844.055	1630.69	809.173	890.317	897.996	1123.15	235.478	117.068	51.6303	186.818	56.3886	211.796
Ta.10679.1.A1_a_at	Os06g24070.1	transcription factor ZmGLK1, putative, expressed	NA	CA696249	n	n	down	down	down	treated	795.276	1120.99	552.212	351.778	135.404	405.524	209.245	701.08	98.5225	43.462	13.6079	83.2365
Ta.10679.1.A1_x_at	Os06g24070.1	transcription factor ZmGLK1, putative, expressed	Putative transcription factor OsGLK1 [Oryza sativa (Rice)]	TA89091_4565	n	n	down	down	down	untreated	746.6	1290.41	649.105	665.557	767.008	925.692	212.182	78.3699	48.2723	62.0938	13.0119	179.819
Ta.10679.1.A1_x_at	Os06g24070.1	transcription factor ZmGLK1, putative, expressed	Putative transcription factor OsGLK1 [Oryza sativa (Rice)]	TA89091_4565	n	n	down	down	down	treated	682.652	885.86	431.929	265.618	84.7246	312.949	134.772	575.519	53.5703	36.4922	20.7379	80.8861
Ta.10680.1.S1_at	Os04g38540.1	aldose 1-epimerase, putative, expressed	OSJNBa0036B21.19 protein [Oryza sativa (japonica cultivar-group)]	TA68204_4565	n	up	up	up	up	untreated	413.32	628.371	536.06	392.804	237.049	210.621	287.837	20.9366	45.5111	41.1469	17.3282	46.0903
Ta.10680.1.S1_at	Os04g38540.1	aldose 1-epimerase, putative, expressed	OSJNBa0036B21.19 protein [Oryza sativa (japonica cultivar-group)]	TA68204_4565	n	up	up	up	up	treated	328.857	1560.54	1559.36	1871.75	3152.88	2054.41	120.164	430.779	53.4398	55.0155	287.818	499.154
Ta.10682.1.A1_at	Os02g46100.1	RING-H2 finger protein ATL1R, putative, expressed	OSJNBa0013K16.6 protein [Oryza sativa (japonica cultivar-group)]	BQ166263	n	up	n	n	n	untreated	418.976	207.32	92.7449	80.106	447.549	355.732	169.981	57.0701	4.64321	59.459	123.831	104.033
Ta.10682.1.A1_at	Os02g46100.1	RING-H2 finger protein ATL1R, putative, expressed	OSJNBa0013K16.6 protein [Oryza sativa (japonica cultivar-group)]	BQ166263	n	up	n	n	n	treated	482.053	344.55	262.225	374.559	520.076	124.096	257.15	50.5984	37.5867	9.03344	84.9363	49.1603
Ta.10690.1.S1_at	Os01g51280.1	acid phosphatase, putative, expressed	P0456F08.8 [Oryza sativa (japonica cultivar-group)]	TA74574_4565	n	n	n	up	n	untreated	1141.5	560.073	478.908	489.499	495.742	537.739	123.987	130.802	42.5154	53.8949	52.364	149.219
Ta.10690.1.S1_at	Os01g51280.1	acid phosphatase, putative, expressed	P0456F08.8 [Oryza sativa (japonica cultivar-group)]	TA74574_4565	n	n	n	up	n	treated	1062.08	674.755	516.031	826.861	2908.24	1491.15	60.1772	130.937	49.792	98.7203	125.02	325.124
Ta.10690.3.S1_a_at	Os01g51280.1	acid phosphatase, putative, expressed	At1g72880 [Arabidopsis thaliana (Mouse-ear cress)]	TA74573_4565	n	n	n	up	n	untreated	347.661	166.149	143.158	183.996	145.715	148.863	54.3579	33.9553	8.68214	53.0899	16.9446	38.9077
Ta.10690.3.S1_a_at	Os01g51280.1	acid phosphatase, putative, expressed	At1g72880 [Arabidopsis thaliana (Mouse-ear cress)]	TA74573_4565	n	n	n	up	n	treated	322.988	205.99	193.913	261.219	1152.05	463.342	24.5823	15.0114	38.6629	25.5879	93.2569	89.7153
Ta.10690.3.S1_x_at	Os01g51280.1	acid phosphatase, putative, expressed	Putative retroelement [Zea mays (Maize)]	CA609445	n	n	n	up	up	untreated	251.777	137.025	122.543	133.925	127.51	119.746	8.67979	27.7825	1.76836	21.5324	7.73613	17.5942
Ta.10690.3.S1_x_at	Os01g51280.1	acid phosphatase, putative, expressed	Putative retroelement [Zea mays (Maize)]	CA609445	n	n	n	up	up	treated	224.044	161.257	154.985	174.766	552.455	272.49	15.8022	18.1462	37.5211	23.1672	41.6114	34.8437
Ta.10698.1.A1_at	Os05g48390.1	ubiquitin conjugating enzyme, putative, expressed	Hypothetical protein OJ1214_E03.18 [Oryza sativa (japonica cultivar-group)]	BQ166319	n	n	n	down	n	untreated	853.431	702.01	563.6	530.383	923.983	841.035	57.7848	119.186	89.683	56.9531	94.2232	125.017
Ta.10698.1.A1_at	Os05g48390.1	ubiquitin conjugating enzyme, putative, expressed	Hypothetical protein OJ1214_E03.18 [Oryza sativa (japonica cultivar-group)]	BQ166319	n	n	n	down	n	treated	944.523	571.119	490.399	396.791	263.472	409.613	81.2182	126.925	49.6437	9.72887	21.2796	87.4065
Ta.10698.1.A1_s_at	Os05g48390.1	ubiquitin conjugating enzyme, putative, expressed	Hypothetical protein OJ1214_E03.18 [Oryza sativa (japonica cultivar-group)]	BQ166319	n	n	n	down	n	untreated	1898.46	1750.68	1460.19	1410.83	2204.24	2002.67	200.519	334.978	234.204	100.851	244.122	211.843
Ta.10698.1.A1_s_at	Os05g48390.1	ubiquitin conjugating enzyme, putative, expressed	Hypothetical protein OJ1214_E03.18 [Oryza sativa (japonica cultivar-group)]	BQ166319	n	n	n	down	n	treated	1987.58	1510.23	1276.23	1204.46	735.624	1115.13	175.755	184.914	157.764	160.848	79.4712	313.053
Ta.10702.1.A1_at	Os01g50010.1	clathrin assembly protein, putative, expressed	Clathrin assembly protein AP180 short form-like [Oryza sativa (japonica cultivar-group)]	TA89181_4565	n	n	n	up	n	untreated	11.1224	12.026	10.683	12.2699	11.091	12.5972	1.09036	0.350125	1.30153	1.91821	1.23456	2.04634
Ta.10702.1.A1_at	Os01g50010.1	clathrin assembly protein, putative, expressed	Clathrin assembly protein AP180 short form-like [Oryza sativa (japonica cultivar-group)]	TA89181_4565	n	n	n	up	n	treated	11.6079	11.5592	11.6868	12.0521	29.4217	13.6684	0.592494	0.222194	1.25866	1.23793	7.93091	1.25046
Ta.10703.1.S1_a_at	Os06g41390.2	protein N-terminal asparagine amidohydrolase, putative, expressed	Expressed protein [Arabidopsis thaliana (Mouse-ear cress)]	TA81529_4565	n	n	n	up	up	untreated	361.504	390.295	488.378	513.037	405.81	375.498	25.6052	38.6181	28.8967	31.828	62.2713	32.2326
Ta.10703.1.S1_a_at	Os06g41390.2	protein N-terminal asparagine amidohydrolase, putative, expressed	Expressed protein [Arabidopsis thaliana (Mouse-ear cress)]	TA81529_4565	n	n	n	up	up	treated	348.176	453.156	481.133	496.986	938.144	919.938	10.2737	49.0005	69.2811	40.2456	52.334	113.532
Ta.10703.3.S1_a_at	Os06g41390.2	protein N-terminal asparagine amidohydrolase, putative, expressed	Expressed protein [Arabidopsis thaliana (Mouse-ear cress)]	TA81529_4565	n	n	n	up	up	untreated	166.745	163.738	190.861	227.258	195.385	186.052	17.3155	12.2421	22.8767	22.176	27.8239	15.8172
Ta.10703.3.S1_a_at	Os06g41390.2	protein N-terminal asparagine amidohydrolase, putative, expressed	Expressed protein [Arabidopsis thaliana (Mouse-ear cress)]	TA81529_4565	n	n	n	up	up	treated	146.905	183.786	237.251	218.925	422.027	424.748	7.58925	17.2486	34.9342	14.2977	19.4303	34.9453
Ta.10705.1.A1_x_at	Os09g38772.1	mo-molybdopterin cofactor sulfurase, putative, expressed	NA	TA95937_4565	n	n	n	down	down	untreated	172.267	133.266	118.052	138.423	174.878	161.106	21.085	20.454	6.03232	12.2256	9.84295	14.51
Ta.10705.1.A1_x_at	Os09g38772.1	mo-molybdopterin cofactor sulfurase, putative, expressed	NA	TA95937_4565	n	n	n	down	down	treated	144.261	107.251	91.0796	85.3135	48.9549	71.1866	14.1547	19.5278	10.7853	3.36923	3.71429	7.8292
Ta.10733.1.A1_at	Os08g32980.1	expressed protein	DRP2 protein [Triticum turgidum subsp. durum (durum wheat)]	TA85408_4565	n	n	n	down	n	untreated	707.484	445.856	792.008	887.549	677.014	680.583	23.2906	41.3135	60.9267	88.0938	22.4589	48.2623
Ta.10733.1.A1_at	Os08g32980.1	expressed protein	DRP2 protein [Triticum turgidum subsp. durum (durum wheat)]	TA85408_4565	n	n	n	down	n	treated	692.36	435.421	630.606	686.506	186.149	348.331	12.8569	150.603	21.0321	19.7886	12.4671	55.4914
Ta.10740.1.S1_x_at	Os05g04660.1	expressed protein	Putative thioesterase family protein [Oryza sativa (japonica cultivar-group)]	TA73763_4565	n	n	up	up	n	untreated	419.863	789.94	684.191	376.405	341.997	274.561	46.6908	136.1	101.114	43.4895	46.788	115.304
Ta.10740.1.S1_x_at	Os05g04660.1	expressed protein	Putative thioesterase family protein [Oryza sativa (japonica cultivar-group)]	TA73763_4565	n	n	up	up	n	treated	379.999	1423.66	1264.6	1021.91	1270.29	965.381	30.209	316.934	239.376	90.3357	104.724	114.591
Ta.10740.2.S1_x_at	Os05g04660.1	expressed protein	Putative thioesterase family protein [Oryza sativa (japonica cultivar-group)]	CA603433	n	n	up	up	up	untreated	318.516	516.409	481.784	271.349	241.098	198.114	48.7211	82.2544	61.2664	31.6239	52.7498	68.6432
Ta.10740.2.S1_x_at	Os05g04660.1	expressed protein	Putative thioesterase family protein [Oryza sativa (japonica cultivar-group)]	CA603433	n	n	up	up	up	treated	276.482	938.529	839.009	654.103	822.104	596.317	15.9542	224.077	168.14	57.6086	58.6796	53.2442
Ta.10742.1.S1_at	Os10g41250.1	glycoprotein, putative, expressed	Hypothetical protein OSJNBb0089A17.6 [Oryza sativa (Rice)]	TA110509_4565	n	n	n	n	up	untreated	243.69	226.681	223.569	264.398	275.311	233.513	20.455	5.60092	36.1799	58.0016	53.5359	40.6054
Ta.10742.1.S1_at	Os10g41250.1	glycoprotein, putative, expressed	Hypothetical protein OSJNBb0089A17.6 [Oryza sativa (Rice)]	TA110509_4565	n	n	n	n	up	treated	245.966	207.699	212.66	216.149	424.766	575.367	24.4484	7.5203	13.2511	29.6383	56.7929	30.2536
Ta.10764.2.S1_a_at	Os02g26700.1	cation transport protein chaC, putative, expressed	Putative OsCTTP [Oryza sativa (japonica cultivar-group)]	CD900091	n	n	n	n	down	untreated	1108.15	1115.64	1131.29	848.99	699.082	871.006	90.6991	572.716	297.217	162.31	76.9021	194.872
Ta.10764.2.S1_a_at	Os02g26700.1	cation transport protein chaC, putative, expressed	Putative OsCTTP [Oryza sativa (japonica cultivar-group)]	CD900091	n	n	n	n	down	treated	1165.99	1110.63	912.51	640.806	391.555	307.57	74.5393	453.9	109.324	128.824	46.799	51.1029
Ta.10770.1.S1_at	Os03g08140.1	tubulin--tyrosine ligase-like protein 12, putative, expressed	Hypothetical protein OSJNBa0050H14.8 [Oryza sativa (japonica cultivar-group)]	TA86934_4565	n	n	n	down	n	untreated	429.143	295.015	365.904	628.056	439.071	431.676	44.1298	37.2047	45.858	40.8857	46.2618	11.9436
Ta.10770.1.S1_at	Os03g08140.1	tubulin--tyrosine ligase-like protein 12, putative, expressed	Hypothetical protein OSJNBa0050H14.8 [Oryza sativa (japonica cultivar-group)]	TA86934_4565	n	n	n	down	n	treated	386.3	342.977	391.306	534.355	183.211	340.413	17.5295	173.621	45.8604	19.2997	24.022	37.3796
Ta.10773.2.S1_a_at	Os01g69910.1	calmodulin-binding transcription activator 4, putative, expressed	anther ethylene-upregulated protein-like [Oryza sativa (japonica cultivar-group)]	CA729746	n	n	n	up	up	untreated	178.923	482.879	284.593	365.753	178.075	168.887	11.1585	22.8264	21.5757	69.7972	23.9962	45.994
Ta.10773.2.S1_a_at	Os01g69910.1	calmodulin-binding transcription activator 4, putative, expressed	anther ethylene-upregulated protein-like [Oryza sativa (japonica cultivar-group)]	CA729746	n	n	n	up	up	treated	150.074	502.463	376.124	506.814	549.836	700.245	9.74266	14.5165	36.6813	15.1475	83.4793	153.655
Ta.10799.1.S1_at	Os03g31400.1	ubiquitin conjugation factor E4 A, putative, expressed	Putative ubiquitin conjugation factor [Oryza sativa (japonica cultivar-group)]	TA77775_4565	n	n	n	up	n	untreated	447.425	1083.08	989.778	757.768	571.306	622.804	50.0165	65.5268	24.3615	131.518	17.2624	191.977
Ta.10799.1.S1_at	Os03g31400.1	ubiquitin conjugation factor E4 A, putative, expressed	Putative ubiquitin conjugation factor [Oryza sativa (japonica cultivar-group)]	TA77775_4565	n	n	n	up	n	treated	430.034	1254.55	1041.73	1014.65	1172.74	1155.78	32.8991	249.954	78.0333	35.3297	96.7066	204.786
Ta.10799.3.S1_a_at	Os03g31400.1	ubiquitin conjugation factor E4 A, putative, expressed	Putative ubiquitin conjugation factor [Oryza sativa (japonica cultivar-group)]	CA687419	n	n	n	up	n	untreated	43.1437	123.522	96.4775	87.7915	62.3647	61.5534	7.11727	10.1083	4.5851	22.69	6.47305	21.0516
Ta.10799.3.S1_a_at	Os03g31400.1	ubiquitin conjugation factor E4 A, putative, expressed	Putative ubiquitin conjugation factor [Oryza sativa (japonica cultivar-group)]	CA687419	n	n	n	up	n	treated	36.5896	141.703	140.018	115.234	156.133	134.538	3.94134	21.5424	24.3039	14.3995	24.4419	10.8836
Ta.10799.3.S1_x_at	Os03g31400.1	ubiquitin conjugation factor E4 A, putative, expressed	Putative ubiquitin conjugation factor [Oryza sativa (japonica cultivar-group)]	CA687419	n	n	n	up	n	untreated	77.997	173.061	172.967	140.75	96.9286	93.8232	7.71132	29.1764	14.8006	23.0092	10.8361	20.9629
Ta.10799.3.S1_x_at	Os03g31400.1	ubiquitin conjugation factor E4 A, putative, expressed	Putative ubiquitin conjugation factor [Oryza sativa (japonica cultivar-group)]	CA687419	n	n	n	up	n	treated	74.8655	213.534	210.311	169.803	211.329	177.811	8.41439	46.9408	29.2355	13.0009	19.1802	0.40821
Ta.10808.1.S1_at	Os02g46650.1	ubiquitin-specific protease 21, putative, expressed	NA	TA93503_4565	n	n	n	up	n	untreated	40.1913	105.103	57.1753	41.8225	43.3433	38.8973	0.686446	17.8693	6.74853	4.6186	3.71973	3.94986
Ta.10808.1.S1_at	Os02g46650.1	ubiquitin-specific protease 21, putative, expressed	NA	TA93503_4565	n	n	n	up	n	treated	34.2861	114.368	45.8701	43.5294	171.36	81.426	1.03444	71.698	7.76858	5.13937	36.446	13.4332
Ta.10811.1.S1_at	Os09g11510.1	expressed protein	AT3g52150/F4F15_260 [Arabidopsis thaliana (Mouse-ear cress)]	TA102317_4565	n	n	down	down	n	untreated	958.452	511.72	757.809	918.221	1145.44	1335.28	112.256	88.8169	62.3042	196.348	51.3324	405.528
Ta.10811.1.S1_at	Os09g11510.1	expressed protein	AT3g52150/F4F15_260 [Arabidopsis thaliana (Mouse-ear cress)]	TA102317_4565	n	n	down	down	n	treated	939.966	337.75	486.212	374.616	113.462	319.429	62.4223	11.2892	90.5098	55.5687	17.4189	84.2591
Ta.10813.1.S1_at	Os03g02010.1	DNA cytosine methyltransferase Zmet3, putative, expressed	Putative cytosine methyltransferase [Hordeum vulgare (Barley)]	TA95486_4565	n	n	n	n	down	untreated	24.5195	69.7565	26.6026	27.0913	29.0557	27.5714	3.82214	9.95259	2.39369	2.46609	2.23578	5.79461
Ta.10813.1.S1_at	Os03g02010.1	DNA cytosine methyltransferase Zmet3, putative, expressed	Putative cytosine methyltransferase [Hordeum vulgare (Barley)]	TA95486_4565	n	n	n	n	down	treated	25.289	48.7327	21.3842	16.2987	14.7061	13.3302	1.89369	32.0874	2.92905	1.31718	2.19746	1.64728
Ta.10813.1.S1_x_at	Os03g02010.1	DNA cytosine methyltransferase Zmet3, putative, expressed	Putative cytosine methyltransferase [Hordeum vulgare (Barley)]	TA95486_4565	n	n	n	down	down	untreated	53.9468	153.814	53.0678	54.8386	66.3932	48.7599	6.50389	18.4304	8.89611	3.60124	3.73802	11.2113
Ta.10813.1.S1_x_at	Os03g02010.1	DNA cytosine methyltransferase Zmet3, putative, expressed	Putative cytosine methyltransferase [Hordeum vulgare (Barley)]	TA95486_4565	n	n	n	down	down	treated	56.7323	100.343	45.4419	33.1133	22.1555	22.8069	12.9923	62.8996	7.55937	3.04808	4.85772	4.22664
Ta.10814.1.S1_at	Os11g10750.1	serine carboxypeptidase F13S12.6 precursor, putative, expressed	Serine carboxypeptidase II-like [Arabidopsis thaliana (Mouse-ear cress)]	CK152214	n	n	n	down	down	untreated	104.108	79.7461	38.9273	58.6097	99.029	48.0132	35.4096	37.2021	3.35412	6.27409	21.039	8.34347
Ta.10814.1.S1_at	Os11g10750.1	serine carboxypeptidase F13S12.6 precursor, putative, expressed	Serine carboxypeptidase II-like [Arabidopsis thaliana (Mouse-ear cress)]	CK152214	n	n	n	down	down	treated	97.8859	62.6484	46.7046	50.0636	27.4458	15.3302	4.60075	14.3726	4.38674	4.84168	3.36423	1.39489
Ta.10817.1.A1_s_at	Os03g11670.1	salt-inducible protein, putative, expressed	67kD chloroplastic RNA-binding protein, P67.1 [Raphanus sativus (Radish)]	TA97085_4565	n	n	n	down	down	untreated	152.732	86.0002	144.471	194.523	150.327	160.783	30.0136	10.2404	7.25322	53.1397	7.13434	23.282
Ta.10817.1.A1_s_at	Os03g11670.1	salt-inducible protein, putative, expressed	67kD chloroplastic RNA-binding protein, P67.1 [Raphanus sativus (Radish)]	TA97085_4565	n	n	n	down	down	treated	144.08	79.9807	95.5247	102.766	45.0255	66.2391	12.827	14.1463	4.56604	9.20758	2.05376	9.47229
Ta.10821.1.S1_at	Os07g28280.1	expressed protein	Putative ubiquitin-related modifier [Oryza sativa (japonica cultivar-group)]	TA86509_4565	n	n	n	down	n	untreated	417.272	223.322	331.699	383.232	405.628	373.855	60.9162	11.7792	25.8573	60.0892	13.0009	37.4356
Ta.10821.1.S1_at	Os07g28280.1	expressed protein	Putative ubiquitin-related modifier [Oryza sativa (japonica cultivar-group)]	TA86509_4565	n	n	n	down	n	treated	399.912	187.125	298.097	251.589	145.136	285.319	8.05684	58.6893	22.3689	15.8757	17.9307	20.4929
Ta.10823.1.A1_s_at	Os06g34040.1	4-methyl-5-thiazole monophosphate biosynthesis protein, putative, expressed	F12M16.18 [Arabidopsis thaliana (Mouse-ear cress)]	TA67008_4565	n	n	n	down	n	untreated	1942.65	1152.32	1331.06	1787.56	1944.37	1894.1	5.23536	64.5301	29.5013	125.116	13.8866	139.514
Ta.10823.1.A1_s_at	Os06g34040.1	4-methyl-5-thiazole monophosphate biosynthesis protein, putative, expressed	F12M16.18 [Arabidopsis thaliana (Mouse-ear cress)]	TA67008_4565	n	n	n	down	n	treated	1917.59	970.633	1020.58	1173.74	725.965	1847.21	22.6571	110.589	67.8573	46.5106	51.1359	310.286
Ta.10831.1.S1_at	Os02g17970.1	cyclic nucleotide-binding domain containing protein, expressed	Putative PKG-Ib [Oryza sativa (japonica cultivar-group)]	TA88159_4565	n	n	down	down	n	untreated	1125.84	832.906	1054.06	970.114	1206.05	1265.19	100.523	49.257	32.2123	80.7204	64.0608	193.553
Ta.10831.1.S1_at	Os02g17970.1	cyclic nucleotide-binding domain containing protein, expressed	Putative PKG-Ib [Oryza sativa (japonica cultivar-group)]	TA88159_4565	n	n	down	down	n	treated	1135.57	569.733	799.291	483.136	252.015	627.937	156.199	99.4044	104.815	20.96	34.8316	31.3673
Ta.10848.1.S1_at	Os03g52630.1	endo-1,4-beta-glucanase Cel1, putative, expressed	Endo-1,4-beta-glucanase Cel1 [Hordeum vulgare (Barley)]	TA82489_4565	n	n	n	down	down	untreated	245.83	103.054	227.225	248.737	174.403	122.839	22.3318	9.05286	12.6441	44.0041	8.43662	15.1115
Ta.10848.1.S1_at	Os03g52630.1	endo-1,4-beta-glucanase Cel1, putative, expressed	Endo-1,4-beta-glucanase Cel1 [Hordeum vulgare (Barley)]	TA82489_4565	n	n	n	down	down	treated	211.375	141.139	164.724	185.99	82.8617	55.6714	37.2207	32.6179	4.67717	18.978	10.107	6.64064
Ta.10852.1.S1_at	Os03g07940.1	AINTEGUMENTA-like protein, putative, expressed	NA	BQ166696	n	n	n	down	n	untreated	191.389	136.187	155.836	197.591	154.217	173.956	23.2415	25.5547	10.9541	28.5587	10.7376	13.2311
Ta.10852.1.S1_at	Os03g07940.1	AINTEGUMENTA-like protein, putative, expressed	NA	BQ166696	n	n	n	down	n	treated	166.293	133.655	117.443	130.104	62.6861	98.2851	8.99139	9.05305	11.0664	9.67317	7.10544	19.4151
Ta.10856.1.A1_at	Os04g34620.1	expressed protein	OSJNBa0035I04.2 protein [Oryza sativa (Rice)]	CA656085	n	n	n	up	up	untreated	156.66	266.37	278.599	302.346	236.276	202.79	18.9478	9.29846	10.5855	26.6381	11.2291	46.3238
Ta.10856.1.A1_at	Os04g34620.1	expressed protein	OSJNBa0035I04.2 protein [Oryza sativa (Rice)]	CA656085	n	n	n	up	up	treated	146.168	329.241	301.171	440.656	635.921	623.147	11.7934	94.6466	14.0941	16.1721	4.17648	35.9762
Ta.10857.1.A1_at	Os01g34790.1	expressed protein	NA	TA84900_4565	n	n	n	up	up	untreated	31.3858	33.6854	125.516	38.7514	24.8965	27.4854	2.67262	1.26407	57.684	6.00826	1.49084	4.39028
Ta.10857.1.A1_at	Os01g34790.1	expressed protein	NA	TA84900_4565	n	n	n	up	up	treated	32.5943	30.2728	56.5421	34.7767	59.3185	196.518	5.76656	5.06416	4.91517	4.82715	5.54004	15.8811
Ta.10858.1.S1_at	Os08g36774.1	protein binding protein, putative, expressed	Putative zinc-finger protein [Oryza sativa (japonica cultivar-group)]	TA86363_4565	n	n	n	down	n	untreated	182.705	200.408	196.074	250.795	206.931	201.546	23.7685	23.6868	1.42321	17.0434	14.9883	27.3801
Ta.10858.1.S1_at	Os08g36774.1	protein binding protein, putative, expressed	Putative zinc-finger protein [Oryza sativa (japonica cultivar-group)]	TA86363_4565	n	n	n	down	n	treated	165.778	192.145	201.661	236.72	86.3898	167.752	10.6047	30.0209	7.82309	22.0361	12.355	13.5952
Ta.10872.1.A1_at	Os06g11830.1	protein dimerization, putative, expressed	Transposase, putative [Oryza sativa (japonica cultivar-group)]	TA93298_4565	n	n	n	n	up	untreated	36.8175	43.2103	35.1564	39.6579	39.0224	30.3527	6.29235	5.31747	4.73853	4.23368	2.77517	2.48893
Ta.10872.1.A1_at	Os06g11830.1	protein dimerization, putative, expressed	Transposase, putative [Oryza sativa (japonica cultivar-group)]	TA93298_4565	n	n	n	n	up	treated	30.5863	41.8438	41.65	48.183	55.4392	65.3559	7.33483	3.40453	4.18481	9.30452	5.89226	6.65437
Ta.1088.1.A1_at	Os04g20164.1	amine oxidase precursor, putative, expressed	OSJNBb0067G11.7 protein [Oryza sativa (japonica cultivar-group)]	TA97839_4565	n	n	n	down	n	untreated	640.794	759.556	1795.59	2856.36	1220.72	984.91	64.9241	220.978	66.069	638.73	114.905	42.8755
Ta.1088.1.A1_at	Os04g20164.1	amine oxidase precursor, putative, expressed	OSJNBb0067G11.7 protein [Oryza sativa (japonica cultivar-group)]	TA97839_4565	n	n	n	down	n	treated	646.24	989.732	1785.54	1886.75	438.19	499.821	81.44	643.991	287.047	339.296	32.81	157.713
Ta.10883.1.S1_x_at	Os02g49150.3	expressed protein	Hypothetical protein P0685G12.15 [Oryza sativa (japonica cultivar-group)]	TA68799_4565	n	n	down	down	n	untreated	444.956	129.825	456.059	681.519	574.93	392.398	81.3593	11.2362	15.2871	14.064	64.4191	40.167
Ta.10883.1.S1_x_at	Os02g49150.3	expressed protein	Hypothetical protein P0685G12.15 [Oryza sativa (japonica cultivar-group)]	TA68799_4565	n	n	down	down	n	treated	432.337	174.889	344.87	339.51	56.1941	207.033	31.7006	147.929	19.2845	16.9685	7.10319	30.5287
Ta.10886.1.A1_at	Os03g02600.1	riboflavin biosynthesis protein ribD, putative, expressed	OSJNBa0096F01.4 protein [Oryza sativa (Rice)]	BQ166757	n	n	n	down	n	untreated	261.243	112.203	222.478	402.013	211.233	220.729	11.1368	3.86604	28.3715	52.718	9.02126	58.4342
Ta.10886.1.A1_at	Os03g02600.1	riboflavin biosynthesis protein ribD, putative, expressed	OSJNBa0096F01.4 protein [Oryza sativa (Rice)]	BQ166757	n	n	n	down	n	treated	248.129	133.586	175.236	250.398	61.7957	109.765	20.4596	70.5519	35.6392	38.9573	6.10615	25.3841
Ta.1089.1.S1_a_at	Os04g36850.1	expressed protein	OSJNBa0027P08.19 protein [Oryza sativa (japonica cultivar-group)]	TA80546_4565	n	n	n	down	n	untreated	237.202	104.575	125.129	207.723	149.746	140.83	12.8079	4.83974	14.7142	20.1585	7.16892	26.6353
Ta.1089.1.S1_a_at	Os04g36850.1	expressed protein	OSJNBa0027P08.19 protein [Oryza sativa (japonica cultivar-group)]	TA80546_4565	n	n	n	down	n	treated	245.076	91.0832	101.119	104.244	38.033	74.1372	24.9749	18.1377	15.0895	17.5459	9.91235	15.4325
Ta.10901.1.S1_at	Os10g42240.1	carbohydrate kinase-like protein, putative, expressed	Putative adenosine kinase [Oryza sativa (Rice)]	TA87188_4565	n	n	down	down	n	untreated	388.879	261.183	332.008	367.724	420.797	504.354	29.8981	18.2466	32.9617	88.4682	42.3597	165.052
Ta.10901.1.S1_at	Os10g42240.1	carbohydrate kinase-like protein, putative, expressed	Putative adenosine kinase [Oryza sativa (Rice)]	TA87188_4565	n	n	down	down	n	treated	352.293	192.595	238.812	143.802	51.8841	172.415	40.3196	49.605	39.7465	15.3927	6.84869	19.0278
Ta.10904.1.A1_at	Os12g41620.1	nucleotide binding protein, putative, expressed	Expressed protein [Oryza sativa (japonica cultivar-group)]	TA86795_4565	n	n	n	down	n	untreated	36.9648	91.4965	81.3299	273.083	129.478	122.082	13.3546	74.8545	23.695	41.7075	33.2243	15.3708
Ta.10904.1.A1_at	Os12g41620.1	nucleotide binding protein, putative, expressed	Expressed protein [Oryza sativa (japonica cultivar-group)]	TA86795_4565	n	n	n	down	n	treated	27.9914	134.791	128.039	300.28	51.4078	194.36	0.614818	169.363	23.2837	47.7373	8.23057	63.4619
Ta.10909.1.S1_s_at	Os06g21380.1	carboxyl-terminal-processing protease precursor, putative, expressed	Putative protease [Oryza sativa (japonica cultivar-group)]	TA54325_4565	n	n	down	down	down	untreated	4821.74	6902.76	3746.89	843.67	12099.7	10881.2	776.219	696.201	587.174	106.95	2085.21	1177.23
Ta.10909.1.S1_s_at	Os06g21380.1	carboxyl-terminal-processing protease precursor, putative, expressed	Putative protease [Oryza sativa (japonica cultivar-group)]	TA54325_4565	n	n	down	down	down	treated	5167.6	3098.18	2152.48	276.711	1186.66	4441.02	621.434	2474.19	339.679	34.6275	419.811	771.123
Ta.10909.1.S1_x_at	Os06g21380.1	carboxyl-terminal-processing protease precursor, putative, expressed	Putative protease [Oryza sativa (japonica cultivar-group)]	TA54325_4565	n	n	down	down	down	untreated	1409.8	2116.55	910.134	172.6	4537.37	3749.17	190.299	380.212	173.004	14.7978	1070.68	582.322
Ta.10909.1.S1_x_at	Os06g21380.1	carboxyl-terminal-processing protease precursor, putative, expressed	Putative protease [Oryza sativa (japonica cultivar-group)]	TA54325_4565	n	n	down	down	down	treated	1498.09	953.67	525.475	66.8396	385.606	1403.43	202.571	787.809	134.604	16.4647	146.907	241.8
Ta.1091.1.A1_at	Os01g67630.1	peptide transporter PTR2, putative, expressed	Putative peptide transport protein [Oryza sativa (japonica cultivar-group)]	BG908685	n	n	n	down	down	untreated	64.6602	112.228	120.087	123.027	103.633	116.981	5.68219	16.2802	8.6404	44.6555	8.57215	7.51344
Ta.1091.1.A1_at	Os01g67630.1	peptide transporter PTR2, putative, expressed	Putative peptide transport protein [Oryza sativa (japonica cultivar-group)]	BG908685	n	n	n	down	down	treated	50.5188	84.6244	73.827	58.5076	31.3864	52.9762	2.34345	18.14	15.0441	2.78813	3.26449	8.11269
Ta.10922.1.S1_at	Os02g04490.1	HAC1, putative, expressed	NA	CD454276	n	n	n	up	n	untreated	649.057	400.903	530.956	437.979	425.414	375.58	63.6463	47.3845	42.3547	25.9252	29.7908	54.6279
Ta.10922.1.S1_at	Os02g04490.1	HAC1, putative, expressed	NA	CD454276	n	n	n	up	n	treated	633.629	445.841	379.111	352.595	976.52	583.096	65.6506	51.3967	63.4852	37.6629	127.582	59.4151
Ta.10927.1.A1_at	Os09g29060.1	expressed protein	MADS box interactor-like [Oryza sativa (japonica cultivar-group)]	TA109433_4565	n	n	n	up	n	untreated	164.737	189.296	208.974	187.581	170.292	156.664	8.53302	38.86	14.0705	9.21877	12.7793	31.7335
Ta.10927.1.A1_at	Os09g29060.1	expressed protein	MADS box interactor-like [Oryza sativa (japonica cultivar-group)]	TA109433_4565	n	n	n	up	n	treated	165.823	198.677	174.853	145.884	443.777	319.216	9.01717	42.5673	15.6119	20.3481	111.725	61.9277
Ta.10929.1.S1_at	Os01g07400.1	WD-repeat domain phosphoinositide-interacting protein 3, putative, expressed	P0028E10.20 protein [Oryza sativa (japonica cultivar-group)]	BQ166837	n	n	n	n	up	untreated	167.187	222.481	283.26	232.657	203.808	187.214	17.023	44.5715	37.79	47.9214	16.5216	34.9125
Ta.10929.1.S1_at	Os01g07400.1	WD-repeat domain phosphoinositide-interacting protein 3, putative, expressed	P0028E10.20 protein [Oryza sativa (japonica cultivar-group)]	BQ166837	n	n	n	n	up	treated	147.26	231.451	248.883	213.02	366.862	421.366	24.3116	25.7269	21.4793	7.12886	67.5556	12.0758
Ta.10966.1.S1_at	Os06g44840.1	homogentisate geranylgeranyl transferase, putative, expressed	Hypothetical protein At2g18950 [Arabidopsis thaliana (Mouse-ear cress)]	TA82502_4565	n	n	n	down	down	untreated	591.453	511.774	818.567	822.436	994.62	730.295	58.8654	26.8659	49.2308	37.1411	13.0565	42.0812
Ta.10966.1.S1_at	Os06g44840.1	homogentisate geranylgeranyl transferase, putative, expressed	Hypothetical protein At2g18950 [Arabidopsis thaliana (Mouse-ear cress)]	TA82502_4565	n	n	n	down	down	treated	504.024	512.179	756.057	696.096	137.124	260.131	28.3676	137.564	59.4913	21.1459	32.17	39.5977
Ta.10970.1.A1_at	Os01g63810.1	starch binding domain containing protein, expressed	NA	TA104589_4565	n	n	down	down	down	untreated	358.111	703.511	585.534	442.01	442.357	394.32	11.0827	16.4004	40.7132	77.8355	51.5659	63.8605
Ta.10970.1.A1_at	Os01g63810.1	starch binding domain containing protein, expressed	NA	TA104589_4565	n	n	down	down	down	treated	319.283	443.345	502.001	147.797	32.0693	47.223	37.989	290.03	143.647	22.0326	2.53544	10.2422
Ta.10982.1.A1_a_at	Os01g49200.1	microtubule-associated protein, putative, expressed	Microtubule-associated protein-like [Oryza sativa (japonica cultivar-group)]	TA79966_4565	n	n	n	n	down	untreated	141.152	123.869	121.45	119.571	154.297	165.043	11.9122	18.66	6.54033	12.5793	7.91337	7.35906
Ta.10982.1.A1_a_at	Os01g49200.1	microtubule-associated protein, putative, expressed	Microtubule-associated protein-like [Oryza sativa (japonica cultivar-group)]	TA79966_4565	n	n	n	n	down	treated	144.904	113.951	98.5209	97.753	84.6141	78.4896	9.9783	18.0102	4.70316	3.82161	9.31375	11.9429
Ta.10989.1.S1_at	Os05g48410.1	50S ribosomal protein L21, mitochondrial precursor, putative, expressed	Putative ribosomal protein L21 [Oryza sativa (japonica cultivar-group)]	TA85644_4565	n	n	n	down	n	untreated	101.645	125.148	140.812	361.531	151.188	150.86	16.881	26.8549	29.0401	49.0488	15.5799	5.89935
Ta.10989.1.S1_at	Os05g48410.1	50S ribosomal protein L21, mitochondrial precursor, putative, expressed	Putative ribosomal protein L21 [Oryza sativa (japonica cultivar-group)]	TA85644_4565	n	n	n	down	n	treated	102.461	152.799	207.301	356.59	63.8829	151.311	23.4286	141.358	55.7119	47.4326	1.69595	23.304
Ta.11.2.S1_a_at	Os05g24550.5	cathepsin B-like cysteine proteinase 3 precursor, putative, expressed	Cathepsin B [Hordeum vulgare (Barley)]	CA612877	n	n	n	n	up	untreated	1284.65	1287.54	4426.17	4841.98	2107.45	1350.34	143	118.245	816.951	865.024	435.401	140.627
Ta.11.2.S1_a_at	Os05g24550.5	cathepsin B-like cysteine proteinase 3 precursor, putative, expressed	Cathepsin B [Hordeum vulgare (Barley)]	CA612877	n	n	n	n	up	treated	1143.49	2294.09	4216.25	3516.97	2287.33	3018.96	102.016	1081.25	370.001	223.046	306.356	227.723
Ta.11.3.S1_a_at	Os05g24550.5	cathepsin B-like cysteine proteinase 3 precursor, putative, expressed	Cathepsin B [Hordeum vulgare (Barley)]	TA56516_4565	n	n	n	n	up	untreated	1614.9	1707.11	4931.95	5445.03	2440.55	1729.3	191.5	148.03	1039.53	527.851	376.576	106.65
Ta.11.3.S1_a_at	Os05g24550.5	cathepsin B-like cysteine proteinase 3 precursor, putative, expressed	Cathepsin B [Hordeum vulgare (Barley)]	TA56516_4565	n	n	n	n	up	treated	1473.94	2664.04	4653.23	3863.81	2700.79	4023.18	55.1663	1166.61	317.246	102.805	333.133	117.471
Ta.11001.2.S1_a_at	Os11g37080.1	h/ACA ribonucleoprotein complex subunit 1-like protein 1, putative, expressed	Hypothetical protein [Oryza sativa (japonica cultivar-group)]	CK217414	n	n	n	down	n	untreated	177.839	127.828	149.336	769.072	262.141	236.213	44.5003	57.6773	69.5743	150.433	23.3809	27.1937
Ta.11001.2.S1_a_at	Os11g37080.1	h/ACA ribonucleoprotein complex subunit 1-like protein 1, putative, expressed	Hypothetical protein [Oryza sativa (japonica cultivar-group)]	CK217414	n	n	n	down	n	treated	146.422	296.18	341.332	824.972	71.5279	378.85	28.5048	396.93	127.457	65.6881	12.0768	110.999
Ta.11016.1.S1_at	Os09g24580.1	calmodulin-like protein, putative, expressed	NA	BQ168385	n	up	up	up	n	untreated	173.39	223.101	402.287	138.859	242.59	1107.78	113.449	89.7457	19.8369	67.6792	135.944	667.38
Ta.11016.1.S1_at	Os09g24580.1	calmodulin-like protein, putative, expressed	NA	BQ168385	n	up	up	up	n	treated	214.786	1424.26	1921.23	2833.01	6349.15	1321.29	162.992	1330.93	657.9	196.981	428.386	240.565
Ta.11022.2.S1_at	Os11g33300.1	O-methyltransferase ZRP4, putative	Flavonoid 7-O-methyltransferase-like [Oryza sativa (japonica cultivar-group)]	TA70111_4565	n	n	down	down	down	untreated	720.822	2697.69	2717.18	2561.34	1002.05	640.677	113.975	146.128	491.227	532.058	111.864	84.4568
Ta.11022.2.S1_at	Os11g33300.1	O-methyltransferase ZRP4, putative	Flavonoid 7-O-methyltransferase-like [Oryza sativa (japonica cultivar-group)]	TA70111_4565	n	n	down	down	down	treated	753.17	1923.01	2067.81	1201.74	29.7455	9.73355	138.507	574.694	180.008	117.252	11.0836	2.0862
Ta.11022.2.S1_x_at	Os11g33300.1	O-methyltransferase ZRP4, putative	Flavonoid 7-O-methyltransferase-like [Oryza sativa (japonica cultivar-group)]	TA70111_4565	n	n	n	down	down	untreated	1162.49	4796.32	4981.94	4407.94	1599.43	987.522	128.562	476.222	949.512	741.279	237.279	208.244
Ta.11022.2.S1_x_at	Os11g33300.1	O-methyltransferase ZRP4, putative	Flavonoid 7-O-methyltransferase-like [Oryza sativa (japonica cultivar-group)]	TA70111_4565	n	n	n	down	down	treated	1239.28	3421.06	3779.51	2221.52	40.106	12.7376	354.778	1081.18	440.318	124	17.0559	1.87414
Ta.11025.1.A1_at	Os06g35550.1	retrotransposon protein, putative, Ty1-copia subclass, expressed	Putative CPRD2 [Oryza sativa (japonica cultivar-group)]	TA89291_4565	n	n	n	up	up	untreated	23.2379	25.4158	22.9276	27.0683	28.5992	25.0456	1.56867	2.31792	3.36167	5.14975	4.91234	5.70332
Ta.11025.1.A1_at	Os06g35550.1	retrotransposon protein, putative, Ty1-copia subclass, expressed	Putative CPRD2 [Oryza sativa (japonica cultivar-group)]	TA89291_4565	n	n	n	up	up	treated	24.948	29.8677	18.403	23.8055	496.07	986.088	1.51187	16.2557	2.13293	2.54621	255.316	154.374
Ta.11042.1.A1_at	Os05g32140.1	UDP-sulfoquinovose synthase, chloroplast precursor, putative, expressed	UDP-sulfoquinovose synthase, chloroplast precursor [Spinacia oleracea (Spinach)]	TA84263_4565	n	n	n	down	n	untreated	1004.65	547.138	1047.94	1454.72	905.787	986.172	170.036	114.269	59.4335	203.604	41.996	343.813
Ta.11042.1.A1_at	Os05g32140.1	UDP-sulfoquinovose synthase, chloroplast precursor, putative, expressed	UDP-sulfoquinovose synthase, chloroplast precursor [Spinacia oleracea (Spinach)]	TA84263_4565	n	n	n	down	n	treated	995.628	547.224	836.043	873.808	262.821	366.086	156.688	252.532	32.9469	8.35679	24.3257	36.7349
Ta.11089.1.A1_at	Os09g17630.1	receptor-like protein kinase 2, putative, expressed	NA	CA670916	n	n	up	n	n	untreated	370.266	757.515	806.131	490.236	138.755	133.683	90.6197	57.5865	7.37074	41.1365	25.8476	106.184
Ta.11089.1.A1_at	Os09g17630.1	receptor-like protein kinase 2, putative, expressed	NA	CA670916	n	n	up	n	n	treated	349.404	1042.56	1338.61	1023.15	244.49	33.8037	51.4146	85.599	99.9658	146.819	38.2578	6.36017
Ta.11095.1.A1_at	Os02g47420.2	pollen-specific kinase partner protein, putative, expressed	NA	TA86790_4565	n	n	n	down	down	untreated	129.703	154.503	66.0909	62.8443	109.552	76.7644	26.0046	14.4473	11.4229	8.31488	15.6298	3.24648
Ta.11095.1.A1_at	Os02g47420.2	pollen-specific kinase partner protein, putative, expressed	NA	TA86790_4565	n	n	n	down	down	treated	141.132	135.621	54.9924	54.197	52.5822	36.6715	5.1443	69.6893	11.8666	8.1723	4.95397	1.09783
Ta.11099.1.A1_at	Os02g09990.1	TMV response-related gene product, putative, expressed	NA	TA98708_4565	n	n	up	up	n	untreated	76.3217	56.86	54.6501	55.9786	61.0373	83.0469	11.1891	6.76058	6.37626	7.69622	9.95643	35.3205
Ta.11099.1.A1_at	Os02g09990.1	TMV response-related gene product, putative, expressed	NA	TA98708_4565	n	n	up	up	n	treated	77.5532	109.822	95.8079	154.504	343.149	178.112	9.0407	67.631	24.5994	24.7215	17.6799	8.90641
Ta.11101.1.S1_at	Os11g06740.1	SYP61, putative, expressed	NA	CK159429	n	n	n	up	n	untreated	259.599	917.407	440.75	473.676	314.6	314.686	4.40069	295.732	3.78365	77.5427	27.4664	83.1475
Ta.11101.1.S1_at	Os11g06740.1	SYP61, putative, expressed	NA	CK159429	n	n	n	up	n	treated	247.139	962.044	557.688	731.852	941.627	649.993	13.6048	188.147	73.6644	35.9425	77.8703	38.7879
Ta.11101.2.S1_x_at	Os11g06740.1	SYP61, putative, expressed	Hypothetical protein [Oryza sativa (japonica cultivar-group)]	CA654977	n	n	n	up	n	untreated	100.442	202.672	134.559	125.233	98.5009	106.569	23.7646	75.8366	3.45711	13.9197	8.07279	7.76727
Ta.11101.2.S1_x_at	Os11g06740.1	SYP61, putative, expressed	Hypothetical protein [Oryza sativa (japonica cultivar-group)]	CA654977	n	n	n	up	n	treated	92.4863	216.078	133.585	158.423	209.725	145.487	6.91813	45.495	13.8468	22.6469	12.2838	15.8914
Ta.11101.3.S1_a_at	Os11g06740.1	SYP61, putative, expressed	Hypothetical protein [Oryza sativa (japonica cultivar-group)]	CA611610	n	n	n	up	n	untreated	104.081	318.784	152.463	160.592	111.165	97.8238	19.9053	165.048	10.5413	32.3446	28.2203	39.3445
Ta.11101.3.S1_a_at	Os11g06740.1	SYP61, putative, expressed	Hypothetical protein [Oryza sativa (japonica cultivar-group)]	CA611610	n	n	n	up	n	treated	98.7273	345.706	167.634	205.81	338.882	190.201	8.44209	54.5018	34.1152	45.8007	26.316	31.5229
Ta.11107.1.S1_s_at	Os01g14830.1	50S ribosomal protein L3-2, chloroplast precursor, putative, expressed	Putative ribosomal protein L3 [Oryza sativa (japonica cultivar-group)]	TA80563_4565	n	n	n	down	n	untreated	209.158	180.955	207.188	454.218	242.659	232.343	12.5697	37.9677	51.5209	47.4124	27.0112	21.0205
Ta.11107.1.S1_s_at	Os01g14830.1	50S ribosomal protein L3-2, chloroplast precursor, putative, expressed	Putative ribosomal protein L3 [Oryza sativa (japonica cultivar-group)]	TA80563_4565	n	n	n	down	n	treated	187.356	215.937	309.83	520.074	103.656	275.214	28.1443	199.632	60.0397	71.3768	20.116	94.0412
Ta.11110.1.S1_at	Os03g49990.1	DELLA protein SLR1, putative, expressed	DELLA protein SLN1 [Hordeum vulgare (Barley)]	TA77789_4565	n	n	n	down	n	untreated	665.24	1145.41	585.637	879.804	812.812	683.113	80.158	114.827	138.478	424.802	98.9846	166.781
Ta.11110.1.S1_at	Os03g49990.1	DELLA protein SLR1, putative, expressed	DELLA protein SLN1 [Hordeum vulgare (Barley)]	TA77789_4565	n	n	n	down	n	treated	617.401	852.445	818.369	451.763	316.484	588.811	88.3801	393.119	478.853	135.849	15.9294	104.693
Ta.11110.1.S1_s_at	Os03g49990.1	DELLA protein SLR1, putative, expressed	DELLA protein SLN1 [Hordeum vulgare (Barley)]	TA77789_4565	n	n	n	down	n	untreated	2857.44	4268.05	2900.72	3177.82	3573.62	3186.69	173.559	372.357	393.166	391.076	347.893	108.629
Ta.11110.1.S1_s_at	Os03g49990.1	DELLA protein SLR1, putative, expressed	DELLA protein SLN1 [Hordeum vulgare (Barley)]	TA77789_4565	n	n	n	down	n	treated	2788.38	3431.83	2083.89	2080.06	1319.14	2644.38	334.966	1181.25	469.641	191.505	67.5858	151.913
Ta.11112.1.S1_at	Os03g03280.1	ATP binding protein, putative, expressed	Receptor protein kinase-like protein [Arabidopsis thaliana (Mouse-ear cress)]	BJ294726	n	n	up	up	n	untreated	306.476	199.341	338.912	328.465	81.5882	110.046	36.3093	28.8203	78.3926	87.354	18.4661	76.1517
Ta.11112.1.S1_at	Os03g03280.1	ATP binding protein, putative, expressed	Receptor protein kinase-like protein [Arabidopsis thaliana (Mouse-ear cress)]	BJ294726	n	n	up	up	n	treated	289.558	419.025	760.899	709.127	314.433	290.459	21.4202	255.2	157.896	142.346	19.1386	70.7417
Ta.11112.3.S1_at	Os03g03280.1	ATP binding protein, putative, expressed	Receptor protein kinase-like protein [Arabidopsis thaliana (Mouse-ear cress)]	TA87103_4565	n	n	up	up	n	untreated	542.049	239.815	681.67	426.444	143.616	191.645	80.1975	32.5245	136.02	86.7892	43.347	121.468
Ta.11112.3.S1_at	Os03g03280.1	ATP binding protein, putative, expressed	Receptor protein kinase-like protein [Arabidopsis thaliana (Mouse-ear cress)]	TA87103_4565	n	n	up	up	n	treated	524.866	622.231	1042.06	1050.26	575.935	458.433	83.7739	469.814	168.001	130.279	8.16816	63.5679
Ta.11118.1.S1_at	Os05g35480.1	phosphoribosylanthranilate transferase, putative, expressed	Putative anthranilate phosphoribosyltransferase [Oryza sativa (japonica cultivar-group)]	TA84771_4565	n	n	n	up	up	untreated	83.3645	90.9297	90.2097	113.711	97.2652	95.5764	13.3948	11.7272	6.25506	24.2803	10.1032	4.96063
Ta.11118.1.S1_at	Os05g35480.1	phosphoribosylanthranilate transferase, putative, expressed	Putative anthranilate phosphoribosyltransferase [Oryza sativa (japonica cultivar-group)]	TA84771_4565	n	n	n	up	up	treated	92.113	101.079	99.7176	97.8918	252.924	196.466	12.6947	20.6376	5.65287	2.99504	3.73807	14.0031
Ta.11120.1.S1_a_at	Os04g33740.1	beta-fructofuranosidase, insoluble isoenzyme 2 precursor, putative, expressed	Apoplastic invertase 1 [Hordeum vulgare (Barley)]	TA63386_4565	n	n	down	down	down	untreated	111.008	154.851	180.093	208.225	219.201	101.347	20.4854	23.5802	24.2775	33.0458	45.734	39.5306
Ta.11120.1.S1_a_at	Os04g33740.1	beta-fructofuranosidase, insoluble isoenzyme 2 precursor, putative, expressed	Apoplastic invertase 1 [Hordeum vulgare (Barley)]	TA63386_4565	n	n	down	down	down	treated	101.604	94.0704	95.8722	53.3093	13.007	14.2406	7.13948	45.3508	6.88139	6.31808	1.71561	4.01784
Ta.11120.1.S1_x_at	Os04g33740.1	beta-fructofuranosidase, insoluble isoenzyme 2 precursor, putative, expressed	Apoplastic invertase 1 [Hordeum vulgare (Barley)]	TA63381_4565	n	n	down	down	down	untreated	115.046	158.81	220.702	228.965	254.081	113.302	13.4435	27.7575	32.2564	33.2665	61.5442	43.7384
Ta.11120.1.S1_x_at	Os04g33740.1	beta-fructofuranosidase, insoluble isoenzyme 2 precursor, putative, expressed	Apoplastic invertase 1 [Hordeum vulgare (Barley)]	TA63381_4565	n	n	down	down	down	treated	106.983	105.422	105.733	63.6648	14.5247	15.1791	13.1809	48.5655	6.48416	3.1462	2.34466	1.21768
Ta.11120.2.S1_x_at	Os04g33740.1	beta-fructofuranosidase, insoluble isoenzyme 2 precursor, putative, expressed	Apoplastic invertase 1 [Hordeum vulgare (Barley)]	CA630507	n	n	down	down	n	untreated	110.162	137.421	155.259	162.267	194.097	107.468	8.80412	18.3166	22.5407	15.6058	39.5178	29.1196
Ta.11120.2.S1_x_at	Os04g33740.1	beta-fructofuranosidase, insoluble isoenzyme 2 precursor, putative, expressed	Apoplastic invertase 1 [Hordeum vulgare (Barley)]	CA630507	n	n	down	down	n	treated	104.642	92.3849	100.745	66.0721	35.3269	35.7837	12.3207	31.4618	5.81962	2.23484	9.83127	17.2091
Ta.11120.3.S1_x_at	Os02g33110.1	beta-fructofuranosidase, insoluble isoenzyme 1 precursor, putative, expressed	Apoplastic invertase 1 [Hordeum vulgare (Barley)]	CA706270	n	n	down	down	down	untreated	104.219	126.536	135.595	147.77	189.882	105.857	21.3063	6.75311	26.9967	11.5363	40.4324	33.5488
Ta.11120.3.S1_x_at	Os02g33110.1	beta-fructofuranosidase, insoluble isoenzyme 1 precursor, putative, expressed	Apoplastic invertase 1 [Hordeum vulgare (Barley)]	CA706270	n	n	down	down	down	treated	89.6576	86.7119	85.9627	62.6104	39.146	33.6322	10.45	29.2408	9.24233	2.30161	3.20225	0.734354
Ta.11132.1.S1_at	Os11g41650.1	adenylyl-sulfate kinase 1, chloroplast precursor, putative, expressed	Adenylylsulfate kinase, putative [Oryza sativa (japonica cultivar-group)]	TA78554_4565	n	n	n	down	down	untreated	609.134	401.865	441.487	570.712	728.515	542.054	97.0234	23.1755	29.829	129.717	68.0157	105.123
Ta.11132.1.S1_at	Os11g41650.1	adenylyl-sulfate kinase 1, chloroplast precursor, putative, expressed	Adenylylsulfate kinase, putative [Oryza sativa (japonica cultivar-group)]	TA78554_4565	n	n	n	down	down	treated	527.34	352.916	387.737	355.04	162.65	257.308	37.4251	14.2848	67.8242	45.3745	15.2802	39.686
Ta.11133.1.S1_at	Os01g04350.1	16.9 kDa class I heat shock protein 2, putative, expressed	Putative LMW heat shock protein [Oryza sativa (japonica cultivar-group)]	TA74460_4565	n	n	n	down	down	untreated	4404.98	2502.57	1298.08	1087.29	3335.47	1805.48	1405.58	543.048	38.6816	68.2256	735.19	213.419
Ta.11133.1.S1_at	Os01g04350.1	16.9 kDa class I heat shock protein 2, putative, expressed	Putative LMW heat shock protein [Oryza sativa (japonica cultivar-group)]	TA74460_4565	n	n	n	down	down	treated	4117.97	1682.73	901.098	751.046	916.17	747.014	487.577	822.324	118.022	84.5106	24.6081	65.5428
Ta.11133.2.S1_x_at	Os01g04350.1	16.9 kDa class I heat shock protein 2, putative, expressed	Putative LMW heat shock protein [Oryza sativa (japonica cultivar-group)]	CA692150	n	n	n	down	down	untreated	532.564	383.075	221.532	188.816	486.291	225.327	126.033	188.736	13.6787	18.0418	146.097	16.4052
Ta.11133.2.S1_x_at	Os01g04350.1	16.9 kDa class I heat shock protein 2, putative, expressed	Putative LMW heat shock protein [Oryza sativa (japonica cultivar-group)]	CA692150	n	n	n	down	down	treated	516.934	237.559	171.78	138.159	184.585	77.8248	125.034	77.1471	35.8971	23.3944	4.02773	5.8375
Ta.11135.1.S1_at	Os01g49529.2	OsWAK10a - OsWAK receptor-like cytoplasmic kinase (OsWAK-RLCK), expressed	Wall-associated kinase 4-like [Oryza sativa (japonica cultivar-group)]	TA83278_4565	n	n	up	up	n	untreated	541.526	148.968	158.922	149.492	131.55	199.545	60.6992	27.565	62.8595	30.8093	13.9788	154.849
Ta.11135.1.S1_at	Os01g49529.2	OsWAK10a - OsWAK receptor-like cytoplasmic kinase (OsWAK-RLCK), expressed	Wall-associated kinase 4-like [Oryza sativa (japonica cultivar-group)]	TA83278_4565	n	n	up	up	n	treated	493.94	339.485	415.517	662.925	1467.91	1228.68	49.1189	291.236	16.8326	58.0844	126.029	49.5016
Ta.11135.1.S1_x_at	Os01g49529.2	OsWAK10a - OsWAK receptor-like cytoplasmic kinase (OsWAK-RLCK), expressed	Wall-associated kinase 4-like [Oryza sativa (japonica cultivar-group)]	TA83278_4565	n	up	up	up	n	untreated	587.5	191.432	196.195	191.514	150.473	246.189	38.9297	22.3198	52.8046	36.4685	15.335	145.908
Ta.11135.1.S1_x_at	Os01g49529.2	OsWAK10a - OsWAK receptor-like cytoplasmic kinase (OsWAK-RLCK), expressed	Wall-associated kinase 4-like [Oryza sativa (japonica cultivar-group)]	TA83278_4565	n	up	up	up	n	treated	567.149	380.978	439.256	716.185	1432.98	1321.58	29.192	308.5	20.886	42.5978	43.688	42.3049
Ta.11136.1.A1_at	Os09g39680.1	sialin, putative, expressed	Putative sialin [Oryza sativa (japonica cultivar-group)]	TA83007_4565	n	n	n	down	n	untreated	444.846	412.37	204.442	328.054	562.725	764.477	48.4163	115.256	66.3173	160.818	71.7181	442.062
Ta.11136.1.A1_at	Os09g39680.1	sialin, putative, expressed	Putative sialin [Oryza sativa (japonica cultivar-group)]	TA83007_4565	n	n	n	down	n	treated	440.223	208.633	199.16	182.5	33.5707	152.125	32.9501	62.8961	107.673	44.1338	7.15363	11.9374
Ta.11147.1.A1_at	Os10g36848.1	cytochrome P450 84A1, putative, expressed	Ferulate-5-hydroxylase [Arabidopsis thaliana (Mouse-ear cress)]	TA83315_4565	n	up	up	up	up	untreated	50.7469	257.775	72.5486	84.7166	84.6644	86.5502	3.46712	24.5681	8.39678	6.16007	5.92982	1.14648
Ta.11147.1.A1_at	Os10g36848.1	cytochrome P450 84A1, putative, expressed	Ferulate-5-hydroxylase [Arabidopsis thaliana (Mouse-ear cress)]	TA83315_4565	n	up	up	up	up	treated	50.9034	429.397	162.328	307.752	888.666	1249.06	8.17407	108.632	12.9671	26.1951	144.817	148.083
Ta.11148.1.S1_at	Os09g20820.1	enolase, putative, expressed	Putative enolase; 31277-33713 [Arabidopsis thaliana (Mouse-ear cress)]	CD892227	n	n	n	up	n	untreated	474.722	373.432	250.775	238.745	256.891	418.204	104.769	128.73	81.462	61.3637	4.36866	35.2328
Ta.11148.1.S1_at	Os09g20820.1	enolase, putative, expressed	Putative enolase; 31277-33713 [Arabidopsis thaliana (Mouse-ear cress)]	CD892227	n	n	n	up	n	treated	423.567	380.227	310.089	340.585	704.299	554.652	27.8029	34.0119	71.339	26.3945	22.6584	61.9812
Ta.11151.1.S1_at	Os03g60390.1	PHD finger protein, putative, expressed	Putative PHD-finger domain containing protein [Oryza sativa (japonica cultivar-group)]	TA84911_4565	n	n	n	up	n	untreated	332.744	491.476	439.907	360.596	274.315	361.191	39.7638	82.9854	21.3173	6.44147	42.5971	56.0462
Ta.11151.1.S1_at	Os03g60390.1	PHD finger protein, putative, expressed	Putative PHD-finger domain containing protein [Oryza sativa (japonica cultivar-group)]	TA84911_4565	n	n	n	up	n	treated	354.406	565.112	506.621	550.421	608.704	486.424	31.3469	103.223	53.5426	9.05092	38.7829	43.9319
Ta.11152.2.A1_a_at	Os03g22120.1	sucrose synthase 2, putative, expressed	Sucrose synthase 3 [Zea mays (Maize)]	TA70737_4565	n	n	n	down	down	untreated	95.0212	118.496	148.862	117.323	211.775	206.107	8.27045	11.6501	18.8567	2.70624	49.9449	48.7093
Ta.11152.2.A1_a_at	Os03g22120.1	sucrose synthase 2, putative, expressed	Sucrose synthase 3 [Zea mays (Maize)]	TA70737_4565	n	n	n	down	down	treated	95.7165	103.64	103.966	79.1742	42.143	75.3992	9.36852	21.8655	24.3525	7.19129	0.94418	7.70288
Ta.11152.3.S1_at	Os03g22120.1	sucrose synthase 2, putative, expressed	Sucrose synthase [Zea mays (Maize)]	BJ271866	n	n	n	down	n	untreated	96.6608	106.077	136.551	117.671	200.204	179.246	10.99	24.1858	15.2608	6.65792	54.1799	31.6766
Ta.11152.3.S1_at	Os03g22120.1	sucrose synthase 2, putative, expressed	Sucrose synthase [Zea mays (Maize)]	BJ271866	n	n	n	down	n	treated	90.4519	90.0818	98.1215	67.1371	32.3439	72.6327	9.38319	10.5286	10.6439	2.74815	6.50822	18.4835
Ta.1116.1.S1_a_at	Os05g24970.1	small nuclear ribonucleoprotein Sm D2, putative, expressed	Putative small nuclear ribonucleoprotein D2 [Arabidopsis thaliana (Mouse-ear cress)]	TA66377_4565	n	n	n	down	n	untreated	2216.35	1659.33	1608.56	2204.67	2380.27	2327.25	336.419	122.699	44.5772	395.83	186.399	273.977
Ta.1116.1.S1_a_at	Os05g24970.1	small nuclear ribonucleoprotein Sm D2, putative, expressed	Putative small nuclear ribonucleoprotein D2 [Arabidopsis thaliana (Mouse-ear cress)]	TA66377_4565	n	n	n	down	n	treated	2128.87	1530.37	1662.82	1865.61	966.157	1311.77	306.8	239.148	208.628	209.682	42.2938	132.929
Ta.11165.1.A1_at	Os05g11820.1	retrotransposon protein, putative, unclassified	NA	BQ169540	n	n	n	up	n	untreated	24.6909	34.5621	30.0356	26.553	21.7981	22.6603	2.84558	6.82164	0.507154	2.79769	3.43449	2.79092
Ta.11165.1.A1_at	Os05g11820.1	retrotransposon protein, putative, unclassified	NA	BQ169540	n	n	n	up	n	treated	19.8141	38.6687	24.293	26.7959	44.761	25.902	1.42713	17.3278	6.55491	5.5308	3.15925	3.61461
Ta.1117.1.S1_at	Os07g01760.1	alanine aminotransferase 2, putative, expressed	Putative alanine aminotransferase [Oryza sativa (japonica cultivar-group)]	TA62623_4565	n	n	n	down	down	untreated	15974.7	12566.7	12124.2	14728.7	16161.6	16003.2	465.507	578.576	312.362	412.226	408.667	1078.11
Ta.1117.1.S1_at	Os07g01760.1	alanine aminotransferase 2, putative, expressed	Putative alanine aminotransferase [Oryza sativa (japonica cultivar-group)]	TA62623_4565	n	n	n	down	down	treated	16860.1	10444	11014.3	9725.86	1291.89	4996.13	904.09	640.295	1374.28	1410.8	383.558	782.792
Ta.11178.3.S1_a_at	Os07g40710.1	circadian clock coupling factor ZGT, putative, expressed	Hypothetical protein OJ1579_C03.19 [Oryza sativa (japonica cultivar-group)]	CA653642	n	n	n	up	n	untreated	214.914	629.136	1639.67	902.927	140.449	206.856	24.6356	254.73	207.575	228.802	36.6662	46.8655
Ta.11178.3.S1_a_at	Os07g40710.1	circadian clock coupling factor ZGT, putative, expressed	Hypothetical protein OJ1579_C03.19 [Oryza sativa (japonica cultivar-group)]	CA653642	n	n	n	up	n	treated	200.444	773.548	1608.17	767.094	323.868	380.034	12.6122	145.556	306.423	184.434	51.3218	57.4961
Ta.1118.1.S1_at	Os08g23710.1	60S ribosomal protein L7a, putative, expressed	60S ribosomal protein L7a [Arabidopsis thaliana (Mouse-ear cress)]	CK157035	n	n	n	down	n	untreated	1705.23	1701.01	1402.48	2967.53	2121.9	2091.86	264.999	435.257	204.745	351.479	162.262	162.831
Ta.1118.1.S1_at	Os08g23710.1	60S ribosomal protein L7a, putative, expressed	60S ribosomal protein L7a [Arabidopsis thaliana (Mouse-ear cress)]	CK157035	n	n	n	down	n	treated	1475.01	2056.83	2291.66	3282.56	785.548	1695.2	234.079	1070.94	489.68	96.7745	96.5246	298.013
Ta.11185.1.A1_a_at	Os09g04430.1	hypothetical protein	NA	TA91213_4565	n	up	up	up	up	untreated	242.332	194.363	166.686	211.428	258.161	400.111	44.6371	8.10412	48.8248	38.1265	45.5756	152.463
Ta.11185.1.A1_a_at	Os09g04430.1	hypothetical protein	NA	TA91213_4565	n	up	up	up	up	treated	208.587	483.476	741.926	1183.79	1558.29	2233.28	36.1763	622.326	193.25	182.123	130.709	254.057
Ta.11185.1.A1_at	Os09g04430.1	hypothetical protein	NA	TA91213_4565	n	up	up	up	up	untreated	274.288	316.734	354.005	305.588	356.286	529.959	65.2813	19.7691	111.752	92.1364	61.4075	311.481
Ta.11185.1.A1_at	Os09g04430.1	hypothetical protein	NA	TA91213_4565	n	up	up	up	up	treated	242.782	868.241	1190.51	2022.63	2393.64	2516.17	33.7822	1127.47	98.1269	255.05	49.6228	217.579
Ta.11194.1.S1_at	Os04g39040.1	UBA and UBX domain-containing protein, putative, expressed	OSJNBa0060P14.10 protein [Oryza sativa (japonica cultivar-group)]	TA52194_4565	n	n	n	up	up	untreated	2515.51	3187.12	3715.79	2885.04	2652.47	2848.68	69.0928	161.486	208.584	100.184	115.368	221.204
Ta.11194.1.S1_at	Os04g39040.1	UBA and UBX domain-containing protein, putative, expressed	OSJNBa0060P14.10 protein [Oryza sativa (japonica cultivar-group)]	TA52194_4565	n	n	n	up	up	treated	2391.71	3248.5	3240.04	3017.65	5444.65	5780.2	115.7	162.073	465.392	166.158	470.241	358.01
Ta.11195.1.S1_x_at	Os12g39640.1	DNA binding protein, putative, expressed	Myb-like DNA-binding domain, SHAQKYF class, putative [Oryza sativa (japonica cultivar-group)]	TA89688_4565	n	n	n	n	down	untreated	663.06	804.634	527.215	549.206	432.142	985.779	242.009	13.3373	99.5166	8.40944	11.3769	176.467
Ta.11195.1.S1_x_at	Os12g39640.1	DNA binding protein, putative, expressed	Myb-like DNA-binding domain, SHAQKYF class, putative [Oryza sativa (japonica cultivar-group)]	TA89688_4565	n	n	n	n	down	treated	651.771	666.53	376.462	435.857	352.49	446.334	136.831	210.236	26.5837	4.02315	49.6215	63.1704
Ta.11198.1.S1_at	Os03g51830.1	heat shock protein binding protein, putative, expressed	Putative DnaJ protein [Oryza sativa (japonica cultivar-group)]	TA83054_4565	n	n	n	up	n	untreated	523.423	489.52	387.071	382.396	479.112	396.565	12.5849	67.648	13.7047	20.787	22.5486	28.6519
Ta.11198.1.S1_at	Os03g51830.1	heat shock protein binding protein, putative, expressed	Putative DnaJ protein [Oryza sativa (japonica cultivar-group)]	TA83054_4565	n	n	n	up	n	treated	481.457	533.691	392.914	473.865	1055.72	787.495	45.9528	36.5415	29.1163	17.0504	100.189	31.3237
Ta.1120.1.S1_at	Os02g51930.1	cytokinin-O-glucosyltransferase 2, putative, expressed	Putative UDP-glucose glucosyltransferase1 [Oryza sativa (japonica cultivar-group)]	TA94694_4565	n	n	n	down	down	untreated	3188.88	2195.38	3890.12	4312.89	2501.57	4064.68	1397.9	1075.39	246.028	1003.17	482.199	907.343
Ta.1120.1.S1_at	Os02g51930.1	cytokinin-O-glucosyltransferase 2, putative, expressed	Putative UDP-glucose glucosyltransferase1 [Oryza sativa (japonica cultivar-group)]	TA94694_4565	n	n	n	down	down	treated	3025.21	1908.67	3624.58	2237.02	160.557	760.34	313.417	275.529	595.546	111.295	25.9018	181.213
Ta.1120.1.S1_x_at	Os02g51930.1	cytokinin-O-glucosyltransferase 2, putative, expressed	Putative UDP-glucose glucosyltransferase1 [Oryza sativa (japonica cultivar-group)]	TA94694_4565	n	n	n	down	down	untreated	2898.98	2272.09	3981.09	4401.72	2384.59	4050.57	1280.23	1214.99	411.778	925.684	429.853	929.099
Ta.1120.1.S1_x_at	Os02g51930.1	cytokinin-O-glucosyltransferase 2, putative, expressed	Putative UDP-glucose glucosyltransferase1 [Oryza sativa (japonica cultivar-group)]	TA94694_4565	n	n	n	down	down	treated	2968.36	1882.21	3517.32	2220.87	173.134	795.41	551.462	348.334	582.596	85.7215	38.3916	206.594
Ta.1120.2.S1_at	Os02g51930.1	cytokinin-O-glucosyltransferase 2, putative, expressed	Putative UDP-glucose glucosyltransferase1 [Oryza sativa (japonica cultivar-group)]	CA677417	n	n	n	down	down	untreated	324.986	236.985	390.36	400.523	230.738	350.151	85.547	95.7253	31.3037	36.2309	26.7675	63.3222
Ta.1120.2.S1_at	Os02g51930.1	cytokinin-O-glucosyltransferase 2, putative, expressed	Putative UDP-glucose glucosyltransferase1 [Oryza sativa (japonica cultivar-group)]	CA677417	n	n	n	down	down	treated	308.598	218.275	308.03	202.285	60.4833	122.392	31.3969	9.17142	46.1108	19.731	3.47189	9.68923
Ta.11200.1.S1_at	Os06g11640.1	serine/threonine-protein phosphatase 2A activator 2, putative, expressed	T3H13.2 protein [Arabidopsis thaliana (Mouse-ear cress)]	TA101984_4565	n	n	n	n	up	untreated	374.239	338.744	433.533	400.972	377.003	346.603	73.855	13.3906	13.5136	5.06918	16.1814	47.9325
Ta.11200.1.S1_at	Os06g11640.1	serine/threonine-protein phosphatase 2A activator 2, putative, expressed	T3H13.2 protein [Arabidopsis thaliana (Mouse-ear cress)]	TA101984_4565	n	n	n	n	up	treated	344.132	385.242	389.888	448.036	631.628	784.787	38.2597	56.5803	45.5172	14.5241	30.0808	24.6138
Ta.11206.1.A1_at	Os01g57073.1	insulin-degrading enzyme, putative, expressed	putative zinc protease [Oryza sativa (japonica cultivar-group)]	TA88249_4565	n	n	up	n	n	untreated	315.553	365.101	290.148	308.892	723.481	660.143	29.2885	41.7176	35.6207	71.811	68.9846	23.4795
Ta.11206.1.A1_at	Os01g57073.1	insulin-degrading enzyme, putative, expressed	putative zinc protease [Oryza sativa (japonica cultivar-group)]	TA88249_4565	n	n	up	n	n	treated	279.933	599.491	362.913	1024.45	1017.25	1065.53	24.3484	407.339	23.9278	98.1333	37.5518	187.261
Ta.1121.1.S1_at	Os06g39690.1	SOUL heme-binding protein, expressed	SOUL heme-binding protein-like [Oryza sativa (japonica cultivar-group)]	TA54870_4565	n	n	down	down	n	untreated	2897.78	2019.52	3026.44	3130.18	2889.87	3247.09	171.893	86.2745	207.708	246.917	149.075	800.789
Ta.1121.1.S1_at	Os06g39690.1	SOUL heme-binding protein, expressed	SOUL heme-binding protein-like [Oryza sativa (japonica cultivar-group)]	TA54870_4565	n	n	down	down	n	treated	2816.24	1425.37	2105.1	1255.71	404.804	1296.84	136.215	191.613	282.384	138.281	20.4662	53.683
Ta.11227.1.S1_at	Os04g43550.1	mazG nucleotide pyrophosphohydrolase domain protein, putative, expressed	OSJNBb0070J16.14 protein [Oryza sativa (japonica cultivar-group)]	TA103369_4565	n	n	up	up	n	untreated	60.0735	67.0822	93.5927	117.398	50.0706	60.8914	8.27787	24.9451	18.4244	23.424	8.81183	10.5066
Ta.11227.1.S1_at	Os04g43550.1	mazG nucleotide pyrophosphohydrolase domain protein, putative, expressed	OSJNBb0070J16.14 protein [Oryza sativa (japonica cultivar-group)]	TA103369_4565	n	n	up	up	n	treated	48.3801	185.317	178.236	422.895	264.968	83.6924	7.60993	202.506	50.1601	34.9148	15.6602	7.073
Ta.1125.1.S1_a_at	Os03g17740.1	organic anion transporter, putative, expressed	Putative phosphate/phosphoenolpyruvate translocator protein [Oryza sativa (japonica cultivar-group)]	TA70361_4565	n	n	up	up	n	untreated	1472.47	2389.99	1351.47	1463.65	1249.54	1363.55	25.8825	441.001	146.19	68.7413	68.6634	474.786
Ta.1125.1.S1_a_at	Os03g17740.1	organic anion transporter, putative, expressed	Putative phosphate/phosphoenolpyruvate translocator protein [Oryza sativa (japonica cultivar-group)]	TA70361_4565	n	n	up	up	n	treated	1375.56	3553.33	2346.21	3319.99	6404	3072.1	126.256	363.243	256.353	119.109	120.229	384.111
Ta.11254.1.S1_at	Os01g42950.1	ATP binding protein, putative, expressed	NA	TA80793_4565	n	n	n	up	up	untreated	1131.85	1792.72	1042.14	1070.03	1199.36	1166.46	62.8437	382.45	34.4095	61.3752	9.18529	156.657
Ta.11254.1.S1_at	Os01g42950.1	ATP binding protein, putative, expressed	NA	TA80793_4565	n	n	n	up	up	treated	1099.02	1950.54	1408.47	1745.38	3543.61	3425.97	10.7095	167.428	115.389	29.9904	176.343	498.672
Ta.11254.2.S1_a_at	Os01g42950.1	ATP binding protein, putative, expressed	Protein kinase family protein-like [Oryza sativa (japonica cultivar-group)]	CA638530	n	n	n	up	up	untreated	366.547	549.804	296.279	320.16	360.131	306.38	41.1122	147.957	27.7125	8.07065	17.6079	28.2966
Ta.11254.2.S1_a_at	Os01g42950.1	ATP binding protein, putative, expressed	Protein kinase family protein-like [Oryza sativa (japonica cultivar-group)]	CA638530	n	n	n	up	up	treated	352.929	603.577	480.642	512.34	1081.28	856.799	38.7624	76.3126	29.2699	2.63553	69.5295	93.6431
Ta.11258.1.A1_at	Os01g51920.1	choline/ethanolamine kinase, putative, expressed	Putative choline kinase CK2 [Oryza sativa (japonica cultivar-group)]	TA74394_4565	n	n	n	down	n	untreated	3068.41	172.964	492.645	208.305	232.669	250.047	1160.41	38.6985	104.792	29.5692	25.6943	80.9138
Ta.11258.1.A1_at	Os01g51920.1	choline/ethanolamine kinase, putative, expressed	Putative choline kinase CK2 [Oryza sativa (japonica cultivar-group)]	TA74394_4565	n	n	n	down	n	treated	2844.01	150.044	261.937	151.441	105.084	227.365	793.964	15.0512	17.0248	15.7899	12.5385	41.6573
Ta.11261.1.S1_at	Os04g58160.2	fiber protein Fb34, putative, expressed	H0801D08.4 protein [Oryza sativa (Rice)]	TA82753_4565	n	n	n	down	n	untreated	896.952	1043.03	821.091	968.941	1167.37	1066.99	76.231	34.2181	52.148	44.1131	28.5521	26.643
Ta.11261.1.S1_at	Os04g58160.2	fiber protein Fb34, putative, expressed	H0801D08.4 protein [Oryza sativa (Rice)]	TA82753_4565	n	n	n	down	n	treated	910.341	881.704	642.34	741.972	529.286	1293.99	24.6217	130.228	61.8798	31.3137	8.35595	123.499
Ta.11288.1.S1_s_at	Os03g08960.1	homeodomain-leucine zipper transcription factor TaHDZipI-1, putative, expressed	Hypothetical protein OJ1217B09.11 [Oryza sativa (japonica cultivar-group)]	TA91129_4565	n	n	n	down	n	untreated	167.906	322.095	159.874	410.008	232.605	243.321	9.56976	48.8362	47.6639	157.049	14.3273	55.449
Ta.11288.1.S1_s_at	Os03g08960.1	homeodomain-leucine zipper transcription factor TaHDZipI-1, putative, expressed	Hypothetical protein OJ1217B09.11 [Oryza sativa (japonica cultivar-group)]	TA91129_4565	n	n	n	down	n	treated	153.735	334.476	132.476	176.948	86.8498	142.991	19.5088	171.076	13.591	25.5062	8.79994	78.7021
Ta.11290.1.A1_at	Os05g04940.1	trmH family tRNA/rRNA methyltransferase, putative, expressed	Putative OBP33PEP [Oryza sativa (japonica cultivar-group)]	BQ169786	n	n	n	down	n	untreated	139.344	102.002	153.923	170.736	151.335	139.147	10.9285	6.25717	12.434	10.151	19.4326	25.9234
Ta.11290.1.A1_at	Os05g04940.1	trmH family tRNA/rRNA methyltransferase, putative, expressed	Putative OBP33PEP [Oryza sativa (japonica cultivar-group)]	BQ169786	n	n	n	down	n	treated	120.86	102.613	131.067	130.747	73.3618	128.755	4.17168	25.313	6.25639	10.0895	14.442	13.3686
Ta.11295.1.A1_at	Os05g44290.1	protein kinase, putative, expressed	Hypothetical protein P0481E12.9 [Oryza sativa (japonica cultivar-group)]	TA86207_4565	n	n	n	down	n	untreated	1307.86	582.84	646.636	737.577	1447.8	887.722	129.139	9.97751	7.84156	54.4456	86.575	65.8309
Ta.11295.1.A1_at	Os05g44290.1	protein kinase, putative, expressed	Hypothetical protein P0481E12.9 [Oryza sativa (japonica cultivar-group)]	TA86207_4565	n	n	n	down	n	treated	1244.01	556.006	610.228	638.454	456.599	568.57	141.508	97.0886	69.7913	23.2528	27.1984	59.8823
Ta.11296.1.A1_at	Os02g17320.1	uridine/cytidine kinase-like 1, putative, expressed	Uridine kinase, putative [Oryza sativa (japonica cultivar-group)]	TA77400_4565	n	n	n	up	n	untreated	543.915	976.682	1663.66	1248.87	449.932	388.366	45.5116	39.7482	143.501	31.8791	30.4032	145.863
Ta.11296.1.A1_at	Os02g17320.1	uridine/cytidine kinase-like 1, putative, expressed	Uridine kinase, putative [Oryza sativa (japonica cultivar-group)]	TA77400_4565	n	n	n	up	n	treated	529.228	1481.98	1363.2	1388.38	954.697	291.842	83.7296	41.3062	67.6729	51.2191	77.529	5.12826
Ta.11296.2.S1_at	Os02g17320.1	uridine/cytidine kinase-like 1, putative, expressed	Putative uracil phosphoribosyltransferase [Oryza sativa (japonica cultivar-group)]	TA77399_4565	n	n	n	up	n	untreated	120.957	248.177	462.16	368.755	123.665	95.0591	27.4508	26.979	36.6922	52.3748	25.2663	35.8449
Ta.11296.2.S1_at	Os02g17320.1	uridine/cytidine kinase-like 1, putative, expressed	Putative uracil phosphoribosyltransferase [Oryza sativa (japonica cultivar-group)]	TA77399_4565	n	n	n	up	n	treated	125.017	414.423	505.572	416.361	368.81	87.9219	25.8875	50.4423	65.0655	34.147	25.558	12.3421
Ta.11298.1.A1_at	Os12g21500.1	exosome complex exonuclease RRP42, putative, expressed	3'''' exoribonuclease, putative [Oryza sativa (japonica cultivar-group)]	TA88782_4565	n	n	n	down	n	treated	111.081	113.171	105.753	159.44	53.0369	114.876	12.7431	46.5771	2.23524	10.2775	5.36467	33.4624
Ta.11298.1.A1_at	Os12g21500.1	exosome complex exonuclease RRP42, putative, expressed	3'''' exoribonuclease, putative [Oryza sativa (japonica cultivar-group)]	TA88782_4565	n	n	n	down	n	untreated	134.509	123.72	130.852	218.968	196.955	228.985	44.9392	38.493	17.5009	28.9028	39.1311	70.0551
Ta.1130.1.S1_a_at	Os07g37550.1	chlorophyll a-b binding protein of LHCII type III, chloroplast precursor, putative, expressed	Putative chlorophyll A-B binding protein of LHCII type III, chloroplast [Oryza sativa (japonica cultivar-group)]	TA63710_4565	n	n	n	down	down	untreated	21831.2	26495.9	29724.7	25123.8	23670.4	27520.6	2046.36	2809.69	324.092	871.602	375.301	481.077
Ta.1130.1.S1_a_at	Os07g37550.1	chlorophyll a-b binding protein of LHCII type III, chloroplast precursor, putative, expressed	Putative chlorophyll A-B binding protein of LHCII type III, chloroplast [Oryza sativa (japonica cultivar-group)]	TA63710_4565	n	n	n	down	down	treated	22676.4	21479.2	29230.4	18136	1250.01	2962.87	1702.63	3506.28	297.702	1972.08	524.4	998.522
Ta.1130.2.S1_x_at	Os07g37550.1	chlorophyll a-b binding protein of LHCII type III, chloroplast precursor, putative, expressed	Putative chlorophyll A-B binding protein of LHCII type III, chloroplast [Oryza sativa (japonica cultivar-group)]	TA63710_4565	n	n	n	down	down	untreated	21261	25758	28947.4	23947.4	21803.6	25951.3	1313.95	3248.85	521.956	941.486	772.37	1085.54
Ta.1130.2.S1_x_at	Os07g37550.1	chlorophyll a-b binding protein of LHCII type III, chloroplast precursor, putative, expressed	Putative chlorophyll A-B binding protein of LHCII type III, chloroplast [Oryza sativa (japonica cultivar-group)]	TA63710_4565	n	n	n	down	down	treated	22062.7	20431.3	27723.5	17607.9	1249.09	2954.18	1025.86	3637.04	455.466	1697.75	562.933	976.562
Ta.1130.3.S1_x_at	Os07g37550.1	chlorophyll a-b binding protein of LHCII type III, chloroplast precursor, putative, expressed	Putative chlorophyll A-B binding protein of LHCII type III, chloroplast [Oryza sativa (japonica cultivar-group)]	TA63699_4565	n	n	n	down	down	untreated	14916.3	19478.2	26499.4	17599.5	16216.8	20380.3	1059.18	3579.23	1432.72	327.559	582.226	2639.9
Ta.1130.3.S1_x_at	Os07g37550.1	chlorophyll a-b binding protein of LHCII type III, chloroplast precursor, putative, expressed	Putative chlorophyll A-B binding protein of LHCII type III, chloroplast [Oryza sativa (japonica cultivar-group)]	TA63699_4565	n	n	n	down	down	treated	15824.2	13302.9	24200.2	10260.7	790.681	2001.52	1303.29	3675.27	2151.3	1450.63	351.273	620.791
Ta.11307.1.S1_a_at	Os06g37660.1	OsPP2Ac-1 - Phosphatase 2A isoform 1 belonging to family 1, expressed	Serine/threonine protein phosphatase PP2A-1 catalytic subunit [Oryza sativa (japonica cultivar-group)]	TA50702_4565	n	n	n	up	n	untreated	1877.13	1961.58	1946.37	1673.58	1341.83	1412.2	124.753	261.62	89.7546	67.4235	119.536	252.941
Ta.11307.1.S1_a_at	Os06g37660.1	OsPP2Ac-1 - Phosphatase 2A isoform 1 belonging to family 1, expressed	Serine/threonine protein phosphatase PP2A-1 catalytic subunit [Oryza sativa (japonica cultivar-group)]	TA50702_4565	n	n	n	up	n	treated	1797.19	2538.08	2262.15	2370.03	3656.56	2681.82	43.1074	240.219	131.667	45.915	215.403	150.205
Ta.11307.1.S1_x_at	Os06g37660.1	OsPP2Ac-1 - Phosphatase 2A isoform 1 belonging to family 1, expressed	Serine/threonine protein phosphatase PP2A-1 catalytic subunit [Oryza sativa (japonica cultivar-group)]	TA50702_4565	n	n	n	up	n	untreated	1596.48	1784.56	1608.46	1502.84	1226.34	1342.08	106.974	281.546	77.7847	53.3811	76.5544	259.342
Ta.11307.1.S1_x_at	Os06g37660.1	OsPP2Ac-1 - Phosphatase 2A isoform 1 belonging to family 1, expressed	Serine/threonine protein phosphatase PP2A-1 catalytic subunit [Oryza sativa (japonica cultivar-group)]	TA50702_4565	n	n	n	up	n	treated	1486.53	2346.98	2002.05	2233.2	3648.79	2466.02	93.0103	298.611	155.138	86.0816	38.7395	135.26
Ta.11307.3.S1_a_at	Os06g37660.1	OsPP2Ac-1 - Phosphatase 2A isoform 1 belonging to family 1, expressed	Serine/threonine protein phosphatase PP2A-1 catalytic subunit [Oryza sativa (japonica cultivar-group)]	TA52599_4565	n	n	n	up	n	untreated	1038.27	1172.98	1077.47	1060.53	760.833	784.534	82.924	202.129	85.2956	78.6358	49.1324	140.091
Ta.11307.3.S1_a_at	Os06g37660.1	OsPP2Ac-1 - Phosphatase 2A isoform 1 belonging to family 1, expressed	Serine/threonine protein phosphatase PP2A-1 catalytic subunit [Oryza sativa (japonica cultivar-group)]	TA52599_4565	n	n	n	up	n	treated	1039.72	1530.58	1520.99	1408.42	2374.08	1443.77	10.0249	183.582	171.555	71.4908	104.286	87.6579
Ta.1131.1.A1_at	Os01g67120.1	rhodanese-like domain containing protein, expressed	P0696G06.27 protein [Oryza sativa (japonica cultivar-group)]	TA67718_4565	n	n	n	down	down	untreated	3233.56	3670.81	3925.67	3879.5	3205.48	3908.11	172.22	383.258	364.088	895.813	535.844	1262.94
Ta.1131.1.A1_at	Os01g67120.1	rhodanese-like domain containing protein, expressed	P0696G06.27 protein [Oryza sativa (japonica cultivar-group)]	TA67718_4565	n	n	n	down	down	treated	3342.35	2226.71	3777.75	2353.85	298.769	913.615	406.278	409.724	1647	965.272	65.9704	242.087
Ta.11314.1.S1_a_at	Os04g40670.1	expressed protein	OSJNBb0011N17.21 protein [Oryza sativa (japonica cultivar-group)]	TA78453_4565	n	n	n	down	n	untreated	616.08	662.87	753.626	776.099	705.151	684.033	55.8805	82.0515	47.3857	137.407	74.3913	89.9398
Ta.11314.1.S1_a_at	Os04g40670.1	expressed protein	OSJNBb0011N17.21 protein [Oryza sativa (japonica cultivar-group)]	TA78453_4565	n	n	n	down	n	treated	614.593	545.895	619.086	457.648	242.737	446.487	56.0395	61.0917	45.9478	18.1963	23.115	48.6672
Ta.11314.1.S1_at	Os04g40670.1	expressed protein	OSJNBb0011N17.21 protein [Oryza sativa (japonica cultivar-group)]	TA78453_4565	n	n	n	down	n	untreated	1164.89	1248.92	1412.26	1456.32	1466.71	1390.55	94.8562	33.7111	115.564	289.219	40.9939	230.699
Ta.11314.1.S1_at	Os04g40670.1	expressed protein	OSJNBb0011N17.21 protein [Oryza sativa (japonica cultivar-group)]	TA78453_4565	n	n	n	down	n	treated	1214.78	929.04	1102.05	838.888	372.333	864.264	155.448	148.42	130.746	80.4223	9.24205	101.34
Ta.11314.2.S1_x_at	Os04g40670.1	expressed protein	OSJNBb0011N17.21 protein [Oryza sativa (japonica cultivar-group)]	CA619157	n	n	n	down	n	untreated	103.763	105.555	112.188	124.33	110.687	123.437	12.3348	11.3387	5.72075	19.9275	3.55364	16.1379
Ta.11314.2.S1_x_at	Os04g40670.1	expressed protein	OSJNBb0011N17.21 protein [Oryza sativa (japonica cultivar-group)]	CA619157	n	n	n	down	n	treated	105.909	85.3379	95.6508	87.1087	52.5204	87.7596	13.1773	3.29436	12.6854	4.68379	1.92122	9.57234
Ta.1134.1.S1_at	Os01g45750.1	bile acid sodium symporter/ transporter, putative, expressed	bile acid:sodium symporter/ transporter [Arabidopsis thaliana]	TA66291_4565	n	n	down	down	n	untreated	1004.49	1373.07	2282.09	3249.64	2266.72	2151.93	164.683	199.244	164.141	167.024	226.818	414.54
Ta.1134.1.S1_at	Os01g45750.1	bile acid sodium symporter/ transporter, putative, expressed	bile acid:sodium symporter/ transporter [Arabidopsis thaliana]	TA66291_4565	n	n	down	down	n	treated	845.851	1144.35	1966.83	1593.08	130.791	1223.55	48.2085	392.694	268.558	52.1173	24.3443	132.737
Ta.11342.1.A1_at	Os02g08420.1	dihydroflavonol-4-reductase, putative, expressed	Cinnamoyl-CoA reductase [Triticum aestivum (Wheat)]	TA78064_4565	n	n	n	up	n	untreated	137.054	135.382	100.185	119.198	184.211	206.565	13.9913	30.3446	13.9594	4.09882	19.4739	33.6363
Ta.11342.1.A1_at	Os02g08420.1	dihydroflavonol-4-reductase, putative, expressed	Cinnamoyl-CoA reductase [Triticum aestivum (Wheat)]	TA78064_4565	n	n	n	up	n	treated	143.372	121.612	96.9221	137.715	855.599	365.818	25.6072	11.9393	2.52242	11.8104	99.479	105.63
Ta.11347.1.S1_a_at	Os07g41190.1	WD-repeat protein 50, putative, expressed	Putative WD repeat protein [Oryza sativa (japonica cultivar-group)]	TA75243_4565	n	n	n	down	n	untreated	88.4767	141.67	150.87	284.822	200.22	167.072	29.0019	69.4987	25.8643	13.5511	37.7812	17.9803
Ta.11347.1.S1_a_at	Os07g41190.1	WD-repeat protein 50, putative, expressed	Putative WD repeat protein [Oryza sativa (japonica cultivar-group)]	TA75243_4565	n	n	n	down	n	treated	77.2013	142.712	159.288	262.682	86.9388	188.666	30.4988	81.4422	15.6614	39.2228	7.05365	46.7616
Ta.11347.1.S1_at	Os07g41190.1	WD-repeat protein 50, putative, expressed	Putative WD repeat protein [Oryza sativa (japonica cultivar-group)]	TA75243_4565	n	n	n	down	n	untreated	56.301	77.0596	100.037	156.51	103.644	97.7811	13.2292	24.1957	8.10532	4.93198	21.5698	6.25129
Ta.11347.1.S1_at	Os07g41190.1	WD-repeat protein 50, putative, expressed	Putative WD repeat protein [Oryza sativa (japonica cultivar-group)]	TA75243_4565	n	n	n	down	n	treated	49.3107	83.201	98.2579	149.96	39.3683	83.1905	6.83724	50.1226	10.8136	10.8573	4.63287	18.2062
Ta.1135.1.S1_at	Os03g03720.1	glyceraldehyde-3-phosphate dehydrogenase B, chloroplast precursor, putative, expressed	EST C74302(E30840) corresponds to a region of the predicted gene [Oryza sativa (japonica cultivar-group)]	TA56008_4565	n	n	n	down	down	untreated	19893.4	10075.2	7160.71	15297.8	13501.4	12731.4	1247.69	279.647	904.329	3477.37	1006.35	3767.2
Ta.1135.1.S1_at	Os03g03720.1	glyceraldehyde-3-phosphate dehydrogenase B, chloroplast precursor, putative, expressed	EST C74302(E30840) corresponds to a region of the predicted gene [Oryza sativa (japonica cultivar-group)]	TA56008_4565	n	n	n	down	down	treated	21055.9	7595.22	6635.37	9862.03	545.197	686.508	1249.36	582.544	3859.15	3933.37	256.881	329.923
Ta.11356.1.A1_at	Os03g19190.1	BRCA1 C Terminus domain containing protein, expressed	NA	BQ169931	n	n	n	n	up	untreated	68.0165	73.7284	71.362	71.3397	92.9584	88.1495	5.41638	10.3538	5.00647	9.35681	11.1149	11.9391
Ta.11356.1.A1_at	Os03g19190.1	BRCA1 C Terminus domain containing protein, expressed	NA	BQ169931	n	n	n	n	up	treated	62.5867	83.4189	70.4839	96.3596	148.374	323.095	8.89776	10.3475	2.70098	13.5911	27.6137	21.5253
Ta.11358.1.A1_at	Os09g09320.1	retrotransposon protein, putative, unclassified, expressed	Hypothetical protein F26A9.14 [Arabidopsis thaliana (Mouse-ear cress)]	BQ169936	n	n	n	down	n	untreated	3638.5	2186.12	2478.94	4261.55	4073.62	3806.24	144.268	200.126	253.207	379.393	154.372	817.26
Ta.11358.1.A1_at	Os09g09320.1	retrotransposon protein, putative, unclassified, expressed	Hypothetical protein F26A9.14 [Arabidopsis thaliana (Mouse-ear cress)]	BQ169936	n	n	n	down	n	treated	3905.13	1774.89	2080.16	2631.56	462.852	1364.19	102.033	637.047	482.681	242.226	104.733	199.908
Ta.11358.2.A1_a_at	Os09g09320.1	retrotransposon protein, putative, unclassified, expressed	Hypothetical protein F26A9.14 [Arabidopsis thaliana (Mouse-ear cress)]	CA625717	n	n	n	down	down	untreated	2460.11	1238.61	1352.63	2515.23	2468.94	2322.86	72.0477	155.157	202.657	398.836	148.055	610.506
Ta.11358.2.A1_a_at	Os09g09320.1	retrotransposon protein, putative, unclassified, expressed	Hypothetical protein F26A9.14 [Arabidopsis thaliana (Mouse-ear cress)]	CA625717	n	n	n	down	down	treated	2575.27	966.622	1265.65	1492.76	242.395	688.692	158.912	343.709	487.707	199.521	25.6877	132.301
Ta.1136.1.S1_at	Os06g09390.1	ethylene-responsive element binding protein 1, putative, expressed	Ethylene response element binding protein [Triticum aestivum (Wheat)]	TA51243_4565	n	n	n	n	down	untreated	2350.85	2820.22	2799.52	2269.37	2353.05	2417.21	286.848	297.094	146.716	41.4038	76.6468	146.225
Ta.1136.1.S1_at	Os06g09390.1	ethylene-responsive element binding protein 1, putative, expressed	Ethylene response element binding protein [Triticum aestivum (Wheat)]	TA51243_4565	n	n	n	n	down	treated	2263.98	2438.08	2243.55	1537.07	1495.82	1047.06	109.995	764.421	140.358	36.9352	95.8636	12.268
Ta.11367.2.S1_at	Os01g44110.1	BRASSINOSTEROID INSENSITIVE 1-associated receptor kinase 1 precursor, putative, expressed	Kinase, putative [Oryza sativa (japonica cultivar-group)]	TA74236_4565	n	n	down	n	n	untreated	612.349	140.005	99.2784	95.8798	242.809	204.973	104.663	23.0184	16.1576	23.4375	35.0475	48.8823
Ta.11367.2.S1_at	Os01g44110.1	BRASSINOSTEROID INSENSITIVE 1-associated receptor kinase 1 precursor, putative, expressed	Kinase, putative [Oryza sativa (japonica cultivar-group)]	TA74236_4565	n	n	down	n	n	treated	522.208	73.9209	85.719	44.7057	326.073	131.167	96.5405	27.6386	12.1875	3.90416	49.9287	18.2775
Ta.11368.1.S1_at	Os05g48160.3	electron carrier/ electron transporter/ iron ion binding protein, putative, expressed	Hypothetical protein At4g32590 [Arabidopsis thaliana (Mouse-ear cress)]	CD882321	n	n	n	down	n	untreated	1148.18	567.403	666.599	551.903	1160.04	1028.67	113.611	65.0042	127.635	115.152	51.3345	223.222
Ta.11368.1.S1_at	Os05g48160.3	electron carrier/ electron transporter/ iron ion binding protein, putative, expressed	Hypothetical protein At4g32590 [Arabidopsis thaliana (Mouse-ear cress)]	CD882321	n	n	n	down	n	treated	1138.05	366.298	554.001	342.005	265.448	756.209	131.101	60.2388	182.031	12.0441	33.7276	106.118
Ta.1137.1.S1_at	Os06g06560.1	soluble starch synthase 1, chloroplast precursor, putative, expressed	Starch synthase 1, chloroplast precursor [Triticum aestivum (Wheat)]	TA57645_4565	n	n	down	down	down	untreated	2836.74	2871.63	3167.48	2016.25	3176.05	3707.81	212.549	56.8372	165.874	295.593	264.137	885.717
Ta.1137.1.S1_at	Os06g06560.1	soluble starch synthase 1, chloroplast precursor, putative, expressed	Starch synthase 1, chloroplast precursor [Triticum aestivum (Wheat)]	TA57645_4565	n	n	down	down	down	treated	2769.45	1462.16	2459.52	856.91	130.104	451.062	254.933	669.389	1130.2	224.329	34.7171	120.26
Ta.1138.1.S1_at	Os05g46480.1	late embryogenesis abundant protein, group 3, putative, expressed	Cold-responsive LEA/RAB-related COR protein [Triticum aestivum (Wheat)]	TA55557_4565	n	n	down	down	down	untreated	650.144	1030.8	4708.63	1278.89	540.971	567.343	162.591	309.685	1318.37	242.123	106.413	260.444
Ta.1138.1.S1_at	Os05g46480.1	late embryogenesis abundant protein, group 3, putative, expressed	Cold-responsive LEA/RAB-related COR protein [Triticum aestivum (Wheat)]	TA55557_4565	n	n	down	down	down	treated	500.104	584.16	1502.41	310.372	23.2917	23.2005	124.014	356.77	464.753	83.1398	1.65248	2.13736
Ta.11384.1.A1_at	Os10g35710.4	expressed protein	Expressed protein [Oryza sativa (japonica cultivar-group)]	TA111750_4565	n	n	n	down	n	untreated	71.8055	76.4147	80.7248	89.2522	95.7689	77.2487	15.581	10.1881	13.2263	23.9815	4.18672	7.64434
Ta.11384.1.A1_at	Os10g35710.4	expressed protein	Expressed protein [Oryza sativa (japonica cultivar-group)]	TA111750_4565	n	n	n	down	n	treated	75.3303	69.5871	63.9647	65.2227	46.1911	62.8388	3.97543	3.81483	6.46521	8.92315	2.99879	6.4643
Ta.11385.1.A1_at	Os01g26120.1	plant integral membrane protein TIGR01569 containing protein, expressed	NA	CK215275	n	n	down	down	n	untreated	560.069	908.204	339.103	631.008	871.464	429.581	91.3563	56.8519	53.5292	38.2426	184.271	63.6098
Ta.11385.1.A1_at	Os01g26120.1	plant integral membrane protein TIGR01569 containing protein, expressed	NA	CK215275	n	n	down	down	n	treated	520.262	646.838	206.913	268.913	275.301	262.373	65.2343	363.013	14.8969	10.8828	25.5008	67.0271
Ta.11386.2.S1_a_at	Os02g34810.1	OsAPx8 - Thylakoid-bound Ascorbate Peroxidase encoding gene, expressed	Putative ascorbate peroxidase [Triticum aestivum (Wheat)]	TA69941_4565	n	n	n	down	down	untreated	7441.54	5351.97	3501.56	2875.56	4579.93	4572.76	244.207	756.565	361.454	1175.07	180.409	1854.4
Ta.11386.2.S1_a_at	Os02g34810.1	OsAPx8 - Thylakoid-bound Ascorbate Peroxidase encoding gene, expressed	Putative ascorbate peroxidase [Triticum aestivum (Wheat)]	TA69941_4565	n	n	n	down	down	treated	8154.6	3808.49	2367.28	1628.89	198.805	20.8405	665.408	2071.86	812.496	584.043	119.884	2.59549
Ta.11386.2.S1_x_at	Os02g34810.1	OsAPx8 - Thylakoid-bound Ascorbate Peroxidase encoding gene, expressed	Putative ascorbate peroxidase [Triticum aestivum (Wheat)]	TA69941_4565	n	n	n	down	down	untreated	6580.79	4450.46	2753.14	2134.68	3715.83	3629.1	613.982	790.524	333.119	973.319	307.809	1553.63
Ta.11386.2.S1_x_at	Os02g34810.1	OsAPx8 - Thylakoid-bound Ascorbate Peroxidase encoding gene, expressed	Putative ascorbate peroxidase [Triticum aestivum (Wheat)]	TA69941_4565	n	n	n	down	down	treated	7135.53	2940.02	1857.95	1142.71	118.502	28.5133	448.106	1833.36	795.769	480.172	73.8813	4.88588
Ta.11389.1.A1_at	Os01g42090.1	seven-transmembrane-domain protein 1, putative, expressed	MtN3-like [Oryza sativa (japonica cultivar-group)]	TA84569_4565	n	n	down	down	n	untreated	306.948	211.589	257.51	327.062	526.305	353.747	51.9509	20.1872	32.6109	54.0508	23.0932	63.3599
Ta.11389.1.A1_at	Os01g42090.1	seven-transmembrane-domain protein 1, putative, expressed	MtN3-like [Oryza sativa (japonica cultivar-group)]	TA84569_4565	n	n	down	down	n	treated	295.167	145.472	146.035	114.666	53.8298	164.838	7.70868	33.0528	17.5086	8.26731	5.45562	15.1702
Ta.1139.1.S1_at	Os11g13890.1	chlorophyll a-b binding protein M9, chloroplast precursor, putative, expressed	Chlorophyll a/b-binding protein CP26-maize [Oryza sativa (japonica cultivar-group)]	CA623383	n	n	down	down	down	untreated	14324.8	14485.6	18951.6	11978.4	11799.2	16876.5	2015.25	3536.17	1698.42	1426.04	1187.85	1365.38
Ta.1139.1.S1_at	Os11g13890.1	chlorophyll a-b binding protein M9, chloroplast precursor, putative, expressed	Chlorophyll a/b-binding protein CP26-maize [Oryza sativa (japonica cultivar-group)]	CA623383	n	n	down	down	down	treated	14848.3	8697.13	16412.3	5743.72	168.396	337.648	1135.2	3089.83	3186.26	1706.25	86.283	223.236
Ta.1139.1.S1_x_at	Os11g13890.1	chlorophyll a-b binding protein M9, chloroplast precursor, putative, expressed	Chlorophyll a/b-binding protein CP26-maize [Oryza sativa (japonica cultivar-group)]	TA60815_4565	n	n	down	down	down	untreated	16992.5	17193	21302.9	14216.8	14206.5	19782.2	2187.69	3881.88	1322.17	1627.8	1307.23	2071.35
Ta.1139.1.S1_x_at	Os11g13890.1	chlorophyll a-b binding protein M9, chloroplast precursor, putative, expressed	Chlorophyll a/b-binding protein CP26-maize [Oryza sativa (japonica cultivar-group)]	TA60815_4565	n	n	down	down	down	treated	17690.8	10107.8	18940.9	6880.46	279.742	491.348	1401.6	3823.05	3477.77	1968.02	118.844	276.456
Ta.114.1.S1_at	Os05g22940.1	acetyl-coenzyme A carboxylase, putative, expressed	Acetyl-coenzyme A carboxylase [Triticum aestivum (Wheat)]	CK208823	n	n	n	down	n	untreated	986.141	765.315	921.739	1362.17	983.517	1001.03	49.2442	19.8814	30.3696	114.003	22.9581	158.127
Ta.114.1.S1_at	Os05g22940.1	acetyl-coenzyme A carboxylase, putative, expressed	Acetyl-coenzyme A carboxylase [Triticum aestivum (Wheat)]	CK208823	n	n	n	down	n	treated	894.317	777.686	942.656	1105.14	343.88	661.42	52.887	250.567	168.68	46.6924	34.548	120.985
Ta.11555.1.S1_at	Os01g11040.1	SCAR-like protein 2, putative, expressed	Hypothetical protein [Oryza sativa (japonica cultivar-group)]	CD915908	n	n	n	down	n	untreated	437.366	318.483	358.173	216.627	443.14	525.902	4.05447	55.8291	8.21522	39.8106	16.5025	20.21
Ta.11555.1.S1_at	Os01g11040.1	SCAR-like protein 2, putative, expressed	Hypothetical protein [Oryza sativa (japonica cultivar-group)]	CD915908	n	n	n	down	n	treated	435.957	217.689	253.65	168.381	199.925	460.089	31.7028	39.6945	17.8541	13.7881	12.2558	30.0156
Ta.11555.2.S1_a_at	Os01g11040.1	SCAR-like protein 2, putative, expressed	SCAR-like protein 2 [Oryza sativa (Rice)]	TA77599_4565	n	n	n	down	n	untreated	93.6611	68.3104	58.9874	48.3823	101.513	107.25	1.83944	0.699838	9.78781	2.55797	9.69668	9.34555
Ta.11555.2.S1_a_at	Os01g11040.1	SCAR-like protein 2, putative, expressed	SCAR-like protein 2 [Oryza sativa (Rice)]	TA77599_4565	n	n	n	down	n	treated	93.6438	44.5372	63.5704	39.6345	45.432	115.86	17.4017	10.3501	21.6904	7.92079	5.8647	15.8622
Ta.11560.1.S1_x_at	Os06g47860.2	expressed protein	Hypothetical protein OSJNBa0050G13.17 [Oryza sativa (japonica cultivar-group)]	TA76870_4565	n	n	n	up	up	untreated	656.642	826.075	483.499	565.256	524.574	448.981	14.4533	70.9542	34.9748	22.5893	109.456	116.395
Ta.11560.1.S1_x_at	Os06g47860.2	expressed protein	Hypothetical protein OSJNBa0050G13.17 [Oryza sativa (japonica cultivar-group)]	TA76870_4565	n	n	n	up	up	treated	604.217	916.59	548.781	691.523	1388.02	1335.13	48.2196	149.505	61.1512	69.9565	51.0754	171.484
Ta.11560.3.S1_a_at	Os06g47860.2	expressed protein	Hypothetical protein OSJNBa0050G13.17 [Oryza sativa (japonica cultivar-group)]	TA76872_4565	n	n	n	up	up	untreated	461.843	569.075	423.424	459.302	444.35	380.075	17.5645	28.999	25.4741	14.8082	77.7243	98.4001
Ta.11560.3.S1_a_at	Os06g47860.2	expressed protein	Hypothetical protein OSJNBa0050G13.17 [Oryza sativa (japonica cultivar-group)]	TA76872_4565	n	n	n	up	up	treated	445.293	646.184	510.841	562.928	1140.7	1050.87	48.9968	20.9134	13.5118	83.3215	85.4736	144.129
Ta.11560.3.S1_at	Os06g47860.1	expressed protein	Hypothetical protein OSJNBa0050G13.17 [Oryza sativa (japonica cultivar-group)]	CA639569	n	n	n	up	up	untreated	186.376	260.213	171.999	162.915	179.54	152.405	4.36963	27.8358	9.50601	5.90648	38.9956	23.2364
Ta.11560.3.S1_at	Os06g47860.1	expressed protein	Hypothetical protein OSJNBa0050G13.17 [Oryza sativa (japonica cultivar-group)]	CA639569	n	n	n	up	up	treated	178.001	261.754	164.441	167.395	450.015	367.866	25.1768	90.5669	15.4119	15.629	34.3047	41.2615
Ta.11560.3.S1_x_at	Os06g47860.1	expressed protein	Hypothetical protein OSJNBa0050G13.17 [Oryza sativa (japonica cultivar-group)]	CA639569	n	n	n	up	up	untreated	161.581	207.113	149.548	160.529	160.168	138.345	14.9245	21.4514	11.8178	16.4074	26.2875	19.9171
Ta.11560.3.S1_x_at	Os06g47860.1	expressed protein	Hypothetical protein OSJNBa0050G13.17 [Oryza sativa (japonica cultivar-group)]	CA639569	n	n	n	up	up	treated	164.788	220.736	162.573	178.169	377.121	334.575	29.2185	29.7239	3.39174	6.38801	8.82065	32.5412
Ta.11570.1.A1_at	Os05g24770.1	seed maturation protein, putative, expressed	Hypothetical protein P0492F05.29 [Oryza sativa (japonica cultivar-group)]	TA93194_4565	n	n	down	down	n	untreated	200.542	46.2263	55.3595	155.296	162.679	115.534	8.66519	2.4773	9.05234	29.2322	36.4646	34.6851
Ta.11570.1.A1_at	Os05g24770.1	seed maturation protein, putative, expressed	Hypothetical protein P0492F05.29 [Oryza sativa (japonica cultivar-group)]	TA93194_4565	n	n	down	down	n	treated	164.954	47.8779	44.0026	72.4808	39.5506	41.4123	26.7845	18.9338	9.03595	8.75573	11.4991	8.21261
Ta.1158.1.S1_a_at	Os05g07130.2	fructose-6-phosphate-2-kinase/fructose-2, 6-bisphosphatase, putative, expressed	Fructose-6-phosphate-2-kinase/fructose-2, 6-bisphosphatase [Oryza sativa (Rice)]	TA57178_4565	n	n	n	down	n	untreated	5834.99	3588.17	3032.08	3526.48	4963.52	4601.95	182.682	320.808	281.778	768.688	430.525	1119.5
Ta.1158.1.S1_a_at	Os05g07130.2	fructose-6-phosphate-2-kinase/fructose-2, 6-bisphosphatase, putative, expressed	Fructose-6-phosphate-2-kinase/fructose-2, 6-bisphosphatase [Oryza sativa (Rice)]	TA57178_4565	n	n	n	down	n	treated	5999.35	2659.91	2732.15	1804.05	171.805	1183.43	293.253	914.579	875.201	342.466	46.7754	303.823
Ta.1158.1.S1_at	Os05g07130.1	fructose-6-phosphate-2-kinase/fructose-2, 6-bisphosphatase, putative, expressed	'putative 6-phosphofructo-2-kinase (EC 2.7.1.105) / fructose-2, 6- bisphosphate 2-phosphatase (EC 3.1.3.46)' [Oryza sativa (japonica cultivar-group)]	CA724921	n	n	down	down	n	untreated	8159.81	4979.37	3959.26	4766.24	7043.57	6543.91	137.55	596.953	391.446	1193.09	277.411	1670.63
Ta.1158.1.S1_at	Os05g07130.1	fructose-6-phosphate-2-kinase/fructose-2, 6-bisphosphatase, putative, expressed	'putative 6-phosphofructo-2-kinase (EC 2.7.1.105) / fructose-2, 6- bisphosphate 2-phosphatase (EC 3.1.3.46)' [Oryza sativa (japonica cultivar-group)]	CA724921	n	n	down	down	n	treated	8332.16	3374.5	3158.01	2346.48	261.946	1521.02	129.165	1209.71	936.745	552.683	46.219	459.286
Ta.1158.3.S1_a_at	Os05g07130.2	fructose-6-phosphate-2-kinase/fructose-2, 6-bisphosphatase, putative, expressed	Fructose-6-phosphate-2-kinase/fructose-2, 6-bisphosphatase [Oryza sativa (Rice)]	TA57178_4565	n	n	down	down	n	untreated	4429.9	2562.14	2269.02	2569.85	3708.78	3423.33	498.592	223.731	184.369	723.997	198.875	1043.8
Ta.1158.3.S1_a_at	Os05g07130.2	fructose-6-phosphate-2-kinase/fructose-2, 6-bisphosphatase, putative, expressed	Fructose-6-phosphate-2-kinase/fructose-2, 6-bisphosphatase [Oryza sativa (Rice)]	TA57178_4565	n	n	down	down	n	treated	4630.63	1811	1984.65	1155.56	139.485	800.981	408.815	708.129	746.119	203.911	22.2705	245.01
Ta.11594.1.S1_at	Os03g15630.1	harpin-induced protein, putative, expressed	Hypothetical protein OJ1041F02.9 [Oryza sativa (japonica cultivar-group)]	CD869509	n	n	n	up	up	untreated	155.627	194.116	156.59	158.776	141.033	158.538	7.78397	20.6693	15.1569	12.8218	14.7492	26.1195
Ta.11594.1.S1_at	Os03g15630.1	harpin-induced protein, putative, expressed	Hypothetical protein OJ1041F02.9 [Oryza sativa (japonica cultivar-group)]	CD869509	n	n	n	up	up	treated	146.632	243.835	180.879	254.252	601.957	401.789	20.5758	32.0965	15.8509	14.1821	66.0274	54.4268
Ta.11599.2.S1_a_at	Os07g44060.1	catalytic/ hydrolase, putative, expressed	Ripening-related protein-like [Oryza sativa (japonica cultivar-group)]	TA77223_4565	n	n	n	down	n	untreated	380.585	772.902	278.509	215.097	546.376	903.867	47.2728	68.6016	20.537	45.8248	46.7378	108.007
Ta.11599.2.S1_a_at	Os07g44060.1	catalytic/ hydrolase, putative, expressed	Ripening-related protein-like [Oryza sativa (japonica cultivar-group)]	TA77223_4565	n	n	n	down	n	treated	409.337	520.364	282.387	170.724	192.331	638.61	22.3093	297.049	58.9098	20.4368	8.41836	88.5535
Ta.116.1.S1_at	Os03g17480.1	IN2-1 protein, putative, expressed	Putative In2.1 protein [Triticum aestivum (Wheat)]	TA57159_4565	n	n	n	up	up	untreated	56.7767	71.2702	59.1744	55.4185	59.4485	64.5262	8.28356	11.2371	7.92438	5.72	4.10278	4.92571
Ta.116.1.S1_at	Os03g17480.1	IN2-1 protein, putative, expressed	Putative In2.1 protein [Triticum aestivum (Wheat)]	TA57159_4565	n	n	n	up	up	treated	57.7473	115.968	71.4162	66.2605	170.425	1075.66	5.67074	46.3841	2.63281	5.80676	50.8617	309.654
Ta.1160.1.S1_at	Os08g23410.1	rubredoxin, putative, expressed	Putative rubredoxin [Oryza sativa (japonica cultivar-group)]	TA72505_4565	n	n	n	down	down	untreated	2311.77	720.35	501.104	1777.77	2107.69	1964.02	88.6408	61.2157	148.841	753.62	277.239	942.158
Ta.1160.1.S1_at	Os08g23410.1	rubredoxin, putative, expressed	Putative rubredoxin [Oryza sativa (japonica cultivar-group)]	TA72505_4565	n	n	n	down	down	treated	2435.3	535.382	391.852	968.419	53.6974	218.332	162.969	269.67	280.767	234.617	19.7211	57.406
Ta.1160.2.S1_x_at	Os08g23410.1	rubredoxin, putative, expressed	Putative rubredoxin [Oryza sativa (japonica cultivar-group)]	CA635399	n	n	n	down	n	untreated	585.775	289.764	261.124	406.418	525.535	548.34	19.4601	14.6558	23.3336	26.7906	39.0297	246.087
Ta.1160.2.S1_x_at	Os08g23410.1	rubredoxin, putative, expressed	Putative rubredoxin [Oryza sativa (japonica cultivar-group)]	CA635399	n	n	n	down	n	treated	677.189	216.036	223.599	270.289	213.839	204.274	118.418	30.4859	81.6102	25.8833	19.2911	26.0007
Ta.11603.1.S1_at	Os07g49040.1	Ca2+/calmodulin-dependent protein kinase phosphatase, putative, expressed	Protein phosphatase 2C-like [Oryza sativa (japonica cultivar-group)]	TA75551_4565	n	n	n	down	n	untreated	1624.01	666.436	357.481	375.928	574.016	501.531	286.342	76.3877	53.9179	32.523	34.9794	54.5012
Ta.11603.1.S1_at	Os07g49040.1	Ca2+/calmodulin-dependent protein kinase phosphatase, putative, expressed	Protein phosphatase 2C-like [Oryza sativa (japonica cultivar-group)]	TA75551_4565	n	n	n	down	n	treated	1586.81	476.001	253.22	220.523	150.905	245.396	190.618	228.448	24.4385	4.08321	22.4148	42.3556
Ta.11603.2.S1_a_at	Os07g49040.1	Ca2+/calmodulin-dependent protein kinase phosphatase, putative, expressed	Protein phosphatase 2C-like [Oryza sativa (japonica cultivar-group)]	CA641341	n	n	n	down	down	untreated	1148.39	450.925	198.592	244.157	371.657	270.428	236.804	56.2531	28.6657	61.1335	23.7897	34.0039
Ta.11603.2.S1_a_at	Os07g49040.1	Ca2+/calmodulin-dependent protein kinase phosphatase, putative, expressed	Protein phosphatase 2C-like [Oryza sativa (japonica cultivar-group)]	CA641341	n	n	n	down	down	treated	1093.75	293.686	212.159	125.544	78.3284	112.871	34.854	154.143	71.7684	32.4072	12.0854	22.9704
Ta.11608.1.A1_at	Os08g41090.1	L-ascorbate peroxidase 4, putative, expressed	Putative L-ascorbate peroxidase [Oryza sativa (japonica cultivar-group)]	TA95643_4565	n	n	n	down	down	untreated	464.026	240.699	422.65	709.91	448.823	451.369	44.7227	36.7298	71.0205	296.901	17.0401	171.881
Ta.11608.1.A1_at	Os08g41090.1	L-ascorbate peroxidase 4, putative, expressed	Putative L-ascorbate peroxidase [Oryza sativa (japonica cultivar-group)]	TA95643_4565	n	n	n	down	down	treated	480.385	202.167	312.721	287.613	47.1424	58.5965	72.3927	63.772	65.1083	11.7467	5.11657	15.91
Ta.1161.1.S1_at	Os01g64960.1	photosystem II 22 kDa protein, chloroplast precursor, putative, expressed	Photosystem II 22 kDa protein, chloroplast precursor [Spinacia oleracea (Spinach)]	TA58581_4565	n	n	n	down	down	untreated	9121.45	8587.07	5852.26	5681.7	9588	10160.9	260.389	824.906	1067.35	2104.61	1192.74	4501.81
Ta.1161.1.S1_at	Os01g64960.1	photosystem II 22 kDa protein, chloroplast precursor, putative, expressed	Photosystem II 22 kDa protein, chloroplast precursor [Spinacia oleracea (Spinach)]	TA58581_4565	n	n	n	down	down	treated	8896.74	5482.39	5265.84	3996.17	367.309	761.348	572.573	2176.11	2852.33	1486	228.439	168.591
Ta.11611.1.S1_at	Os09g10910.2	fiber protein Fb34, putative, expressed	T6J4.13 protein [Arabidopsis thaliana (Mouse-ear cress)]	TA70249_4565	n	n	n	n	up	untreated	83.8292	466.117	360.916	671.372	284.354	192.913	20.7557	71.7195	32.872	80.1446	41.5371	19.7743
Ta.11611.1.S1_at	Os09g10910.2	fiber protein Fb34, putative, expressed	T6J4.13 protein [Arabidopsis thaliana (Mouse-ear cress)]	TA70249_4565	n	n	n	n	up	treated	80.4023	486.108	462.463	577.874	245.088	414.621	6.43776	103.889	42.7127	33.1132	30.1334	63.6615
Ta.11619.1.A1_at	Os08g32160.1	oxidoreductase, putative, expressed	Putative 2-oxoglutarate-dependent dioxygenase [Oryza sativa (japonica cultivar-group)]	TA73932_4565	n	n	n	up	n	untreated	24.6169	84.6208	75.5624	87.2943	49.2746	42.5468	5.45304	6.55182	17.3608	12.0025	4.53696	14.9766
Ta.11619.1.A1_at	Os08g32160.1	oxidoreductase, putative, expressed	Putative 2-oxoglutarate-dependent dioxygenase [Oryza sativa (japonica cultivar-group)]	TA73932_4565	n	n	n	up	n	treated	25.6035	113.317	134.55	155.387	115.309	131.809	4.48349	27.5725	18.5154	10.2888	25.8539	22.4163
Ta.11623.2.A1_at	Os08g38700.1	BTB/POZ domain containing protein, expressed	POZ domain protein family-like [Oryza sativa (japonica cultivar-group)]	BQ238493	n	n	n	up	up	untreated	168.745	151.648	1158.02	744.259	129.364	80.9208	28.1341	25.0938	141.49	109.544	32.124	3.91816
Ta.11623.2.A1_at	Os08g38700.1	BTB/POZ domain containing protein, expressed	POZ domain protein family-like [Oryza sativa (japonica cultivar-group)]	BQ238493	n	n	n	up	up	treated	171.071	358.563	778.601	541.199	280.747	207.39	16.983	135.004	310.732	86.7801	36.3638	23.4338
Ta.11647.3.S1_a_at	Os06g14190.1	transcriptional repressor NF-X1, putative, expressed	Putative TF-like protein [Oryza sativa (japonica cultivar-group)]	TA83351_4565	n	n	n	up	n	untreated	346.483	375.64	274.593	316.892	348.621	426.691	18.6359	9.25974	27.706	77.2275	46.862	148.559
Ta.11647.3.S1_a_at	Os06g14190.1	transcriptional repressor NF-X1, putative, expressed	Putative TF-like protein [Oryza sativa (japonica cultivar-group)]	TA83351_4565	n	n	n	up	n	treated	332.859	371.784	341.679	402.504	712.254	637.607	48.9686	22.8126	54.6566	66.5704	78.449	94.2582
Ta.1166.1.A1_at	Os01g64660.2	fructose-1,6-bisphosphatase, cytosolic, putative, expressed	Fructose-1,6-bisphosphatase, cytosolic [Oryza coarctata (Wild rice) (Porteresia coarctata)]	TA55386_4565	n	n	n	down	down	untreated	366.396	170.746	147.219	517.636	297.481	264.277	58.3782	11.5171	33.3317	197.622	20.0475	119.331
Ta.1166.1.A1_at	Os01g64660.2	fructose-1,6-bisphosphatase, cytosolic, putative, expressed	Fructose-1,6-bisphosphatase, cytosolic [Oryza coarctata (Wild rice) (Porteresia coarctata)]	TA55386_4565	n	n	n	down	down	treated	388.068	96.2114	85.814	159.683	15.2312	13.7731	94.6928	38.9897	41.5284	67.0421	0.962836	0.729331
Ta.1166.1.A1_x_at	Os01g64660.2	fructose-1,6-bisphosphatase, cytosolic, putative, expressed	Fructose-1,6-bisphosphatase, cytosolic [Oryza coarctata (Wild rice) (Porteresia coarctata)]	TA55386_4565	n	n	down	down	down	untreated	461.689	212.299	192.096	526.203	372.039	309.264	75.6088	8.12791	19.8253	222.257	26.6956	117.429
Ta.1166.1.A1_x_at	Os01g64660.2	fructose-1,6-bisphosphatase, cytosolic, putative, expressed	Fructose-1,6-bisphosphatase, cytosolic [Oryza coarctata (Wild rice) (Porteresia coarctata)]	TA55386_4565	n	n	down	down	down	treated	503.027	108.438	105.534	161	13.2981	10.1513	73.0135	24.289	67.5236	55.2535	2.71589	1.82324
Ta.1166.2.S1_a_at	Os01g64660.2	fructose-1,6-bisphosphatase, cytosolic, putative, expressed	Fructose-1,6-bisphosphatase, cytosolic [Oryza coarctata (Wild rice) (Porteresia coarctata)]	TA55523_4565	n	n	n	down	down	untreated	15467.1	7837.97	6063.59	9914.87	11690.3	10138.2	1756.9	1224.47	368.409	1992.53	568.86	2925.68
Ta.1166.2.S1_a_at	Os01g64660.2	fructose-1,6-bisphosphatase, cytosolic, putative, expressed	Fructose-1,6-bisphosphatase, cytosolic [Oryza coarctata (Wild rice) (Porteresia coarctata)]	TA55523_4565	n	n	n	down	down	treated	15901.8	5277.6	4243.01	4856.35	281.858	389.08	475.654	1239.47	1862.39	1771.44	85.3192	127.898
Ta.1166.2.S1_at	Os01g64660.2	fructose-1,6-bisphosphatase, cytosolic, putative, expressed	Fructose-1,6-bisphosphatase, cytosolic [Saccharum hybrid (Sugarcane)]	TA55521_4565	n	n	down	down	down	untreated	8455.08	5021.63	4119.42	6759.63	7276.07	6202.93	1055.34	645.473	286.133	926.251	126.805	1632.07
Ta.1166.2.S1_at	Os01g64660.2	fructose-1,6-bisphosphatase, cytosolic, putative, expressed	Fructose-1,6-bisphosphatase, cytosolic [Saccharum hybrid (Sugarcane)]	TA55521_4565	n	n	down	down	down	treated	8949.32	3169.14	2646.45	3234.57	179.533	293.05	559.211	447.331	1103.14	882.29	43.9341	117.531
Ta.11660.1.S1_at	Os01g72460.1	NADPH quinone oxidoreductase 2, putative, expressed	Putative NADPH:quinone oxidoreductase 2 [Oryza sativa (Rice)]	TA101303_4565	n	up	up	up	n	untreated	461.437	407.621	329.176	292.924	275.347	286.409	25.2982	48.2388	34.0868	28.9327	5.59177	81.5632
Ta.11660.1.S1_at	Os01g72460.1	NADPH quinone oxidoreductase 2, putative, expressed	Putative NADPH:quinone oxidoreductase 2 [Oryza sativa (Rice)]	TA101303_4565	n	up	up	up	n	treated	431.467	621.878	691.86	795.464	660.253	706.269	37.2715	166.234	75.8746	59.9899	41.789	73.849
Ta.11660.1.S1_x_at	Os01g72460.1	NADPH quinone oxidoreductase 2, putative, expressed	Putative NADPH:quinone oxidoreductase 2 [Oryza sativa (Rice)]	TA101303_4565	n	up	up	up	up	untreated	429.661	390.889	300.705	262.892	273.044	284.727	33.6135	47.9625	40.1336	28.1829	57.7548	53.8026
Ta.11660.1.S1_x_at	Os01g72460.1	NADPH quinone oxidoreductase 2, putative, expressed	Putative NADPH:quinone oxidoreductase 2 [Oryza sativa (Rice)]	TA101303_4565	n	up	up	up	up	treated	401.323	647.411	652.399	744.954	644.664	727.719	25.48	176.299	89.3914	121.018	43.5744	62.2362
Ta.11669.1.S1_a_at	Os09g12560.1	ferrochelatase-2, chloroplast precursor, putative, expressed	Ferrochelatase-2, chloroplast precursor [Hordeum vulgare (Barley)]	TA71112_4565	n	n	up	up	n	untreated	1463.2	3337.03	1725.9	1341.09	1514.01	1516.71	141.724	778.396	135.334	154.922	8.19188	412.149
Ta.11669.1.S1_a_at	Os09g12560.1	ferrochelatase-2, chloroplast precursor, putative, expressed	Ferrochelatase-2, chloroplast precursor [Hordeum vulgare (Barley)]	TA71112_4565	n	n	up	up	n	treated	1345.3	4415.52	2942.14	3209.88	5484.03	3184.2	42.378	924.975	445.71	222.404	44.6859	363.545
Ta.11669.3.S1_a_at	Os09g12560.1	ferrochelatase-2, chloroplast precursor, putative, expressed	Ferrochelatase-2, chloroplast precursor [Hordeum vulgare (Barley)]	CA641602	n	n	up	up	n	untreated	693.252	1682.87	892.096	607.436	737.863	677.725	142.85	413.614	42.3242	123.354	51.7049	163.477
Ta.11669.3.S1_a_at	Os09g12560.1	ferrochelatase-2, chloroplast precursor, putative, expressed	Ferrochelatase-2, chloroplast precursor [Hordeum vulgare (Barley)]	CA641602	n	n	up	up	n	treated	640.967	2201.32	1434.02	1427.95	2883.05	1398.69	46.6034	541.627	276.446	213.534	202.903	207.238
Ta.1167.1.S1_at	Os02g01340.2	ferredoxin--NADP reductase, leaf isozyme, chloroplast precursor, putative, expressed	Ferredoxin-NADP(H) oxidoreductase [Triticum aestivum (Wheat)]	TA54214_4565	n	n	n	down	down	untreated	18967.5	15214	13106.7	15023.5	17270.1	16889.8	289.65	937.794	269.435	1544.71	994.657	2185.55
Ta.1167.1.S1_at	Os02g01340.2	ferredoxin--NADP reductase, leaf isozyme, chloroplast precursor, putative, expressed	Ferredoxin-NADP(H) oxidoreductase [Triticum aestivum (Wheat)]	TA54214_4565	n	n	n	down	down	treated	18985	11484.4	12219.7	10759.2	1316.28	4075.61	660.382	1748.45	2580.61	2354.6	567.177	1253.91
Ta.11671.1.S1_at	Os09g28354.1	heat shock factor protein 4, putative, expressed	NA	TA85180_4565	n	up	up	up	up	untreated	855.142	256.607	227.314	225.329	302.503	252.314	248.917	78.797	51.8721	47.7899	69.8643	166.353
Ta.11671.1.S1_at	Os09g28354.1	heat shock factor protein 4, putative, expressed	NA	TA85180_4565	n	up	up	up	up	treated	760.941	1021.7	1075.82	1542.52	4902.94	3682.34	43.3024	544.633	183.31	220.859	590.43	661.23
Ta.11671.2.S1_x_at	Os09g28354.1	heat shock factor protein 4, putative, expressed	NA	CA659127	n	n	n	n	up	untreated	116.365	58.3786	73.1605	60.4209	69.3763	68.2259	30.7565	0.869662	10.0018	3.30191	13.8027	7.96007
Ta.11671.2.S1_x_at	Os09g28354.1	heat shock factor protein 4, putative, expressed	NA	CA659127	n	n	n	n	up	treated	105.316	91.5189	93.6776	94.4806	180.092	137.554	9.07936	20.9963	6.9428	9.21369	57.609	3.64523
Ta.11674.1.S1_at	Os06g06340.1	nonspecific lipid-transfer protein precursor, putative	NA	CV779294	n	n	n	n	up	untreated	61.3307	51.3474	67.1611	69.9639	74.8379	66.4904	12.0147	3.87965	14.5555	3.18716	23.537	2.80235
Ta.11674.1.S1_at	Os06g06340.1	nonspecific lipid-transfer protein precursor, putative	NA	CV779294	n	n	n	n	up	treated	61.5628	73.2368	73.8194	102.209	146.591	142.203	2.66296	24.2632	20.7963	10.2567	20.2722	26.541
Ta.11678.1.S1_at	Os09g24670.1	CAAX amino terminal protease family protein, putative, expressed	prenyl-dependent CAAX protease [Arabidopsis thaliana]	BQ170580	n	n	down	down	n	untreated	180.642	139.885	333.711	379.986	156.472	193.055	23.2387	28.9938	30.638	27.5549	22.2576	68.1143
Ta.11678.1.S1_at	Os09g24670.1	CAAX amino terminal protease family protein, putative, expressed	prenyl-dependent CAAX protease [Arabidopsis thaliana]	BQ170580	n	n	down	down	n	treated	169.18	144.557	211.025	170.867	65.2312	40.7621	12.3719	17.8379	8.03439	11.4083	13.5174	8.48543
Ta.11679.1.S1_at	Os03g51510.2	mitochondrial 60S ribosomal protein L6, putative, expressed	Putative ribosomal protein L6 [Oryza sativa (japonica cultivar-group)]	TA71192_4565	n	n	n	down	n	untreated	142.187	85.9242	129.15	146.961	128.76	121.984	13.479	13.1323	1.93595	10.788	13.1924	14.2789
Ta.11679.1.S1_at	Os03g51510.2	mitochondrial 60S ribosomal protein L6, putative, expressed	Putative ribosomal protein L6 [Oryza sativa (japonica cultivar-group)]	TA71192_4565	n	n	n	down	n	treated	132.505	86.2677	105.066	111.564	59.451	85.7037	10.1506	31.0794	5.94095	12.9291	5.47546	5.27696
Ta.11679.1.S1_x_at	Os03g51510.2	mitochondrial 60S ribosomal protein L6, putative, expressed	Putative ribosomal protein L6 [Oryza sativa (japonica cultivar-group)]	TA71192_4565	n	n	n	down	n	untreated	193.158	106.062	152.763	207.964	182.443	153.069	4.44601	16.8836	13.0421	16.5097	17.1771	21.311
Ta.11679.1.S1_x_at	Os03g51510.2	mitochondrial 60S ribosomal protein L6, putative, expressed	Putative ribosomal protein L6 [Oryza sativa (japonica cultivar-group)]	TA71192_4565	n	n	n	down	n	treated	184.254	103.904	132.254	152.33	82.7612	124.872	32.3797	41.6121	9.07611	5.42622	5.72996	11.2115
Ta.11685.1.S1_at	Os06g42790.1	nudix hydrolase 2, putative, expressed	MutT domain protein-like [Oryza sativa (japonica cultivar-group)]	TA85891_4565	n	n	down	down	n	untreated	795.451	2680.1	3420.39	3392.74	1201.13	1155.85	57.1042	39.925	345.891	49.8872	93.2938	249.355
Ta.11685.1.S1_at	Os06g42790.1	nudix hydrolase 2, putative, expressed	MutT domain protein-like [Oryza sativa (japonica cultivar-group)]	TA85891_4565	n	n	down	down	n	treated	771.88	1945.09	2248.8	1276.96	251.808	756.238	98.9829	730.545	135.611	109.865	27.0099	18.0264
Ta.11699.1.A1_at	Os06g37620.1	ATP binding protein, putative, expressed	S-receptor kinase-like [Oryza sativa (japonica cultivar-group)]	TA85749_4565	n	n	up	up	n	untreated	243.914	238.177	244.452	183.885	252.278	195.023	42.2472	19.737	24.814	22.8599	35.3931	83.1155
Ta.11699.1.A1_at	Os06g37620.1	ATP binding protein, putative, expressed	S-receptor kinase-like [Oryza sativa (japonica cultivar-group)]	TA85749_4565	n	n	up	up	n	treated	217.347	386.314	445.235	488.916	756.2	468.858	26.0441	134.207	108.397	62.9194	40.2504	70.4832
Ta.11699.2.S1_at	Os06g37620.1	ATP binding protein, putative, expressed	S-receptor kinase-like [Oryza sativa (japonica cultivar-group)]	BG907906	n	n	n	up	n	untreated	79.9943	62.0178	74.9108	56.3737	72.9728	70.9736	5.44091	4.95097	4.98528	5.61618	4.19356	15.1602
Ta.11699.2.S1_at	Os06g37620.1	ATP binding protein, putative, expressed	S-receptor kinase-like [Oryza sativa (japonica cultivar-group)]	BG907906	n	n	n	up	n	treated	64.5123	92.7536	119.205	94.6156	183.002	113.356	9.73922	22.4748	19.2433	10.5454	46.5766	12.9232
Ta.1170.1.S1_at	Os08g41830.1	sulfite oxidase, putative, expressed	Moco containing protein (Moco containing protein(OsMCP)) [Oryza sativa (japonica cultivar-group)]	TA73184_4565	n	n	n	down	n	untreated	2336.89	2053.09	3014.04	2384.22	2441.25	2601.67	291.188	152.34	189.464	312.53	118.778	387.366
Ta.1170.1.S1_at	Os08g41830.1	sulfite oxidase, putative, expressed	Moco containing protein (Moco containing protein(OsMCP)) [Oryza sativa (japonica cultivar-group)]	TA73184_4565	n	n	n	down	n	treated	2438.32	1907.48	2522.71	1872.86	1183.54	1664.6	137.552	239.652	304.911	125.46	100.271	243.589
Ta.1170.1.S1_s_at	Os08g41830.1	sulfite oxidase, putative, expressed	Moco containing protein (Moco containing protein(OsMCP)) [Oryza sativa (japonica cultivar-group)]	CA649224	n	n	n	down	n	untreated	3358.81	2681.3	4099.77	3157.8	3274.25	3554.47	534.687	170.062	161.163	438.498	181.89	327.12
Ta.1170.1.S1_s_at	Os08g41830.1	sulfite oxidase, putative, expressed	Moco containing protein (Moco containing protein(OsMCP)) [Oryza sativa (japonica cultivar-group)]	CA649224	n	n	n	down	n	treated	3258.88	2298.51	3180.73	2187.56	1475	2146.06	140.127	197.074	212.045	109.231	82.9244	185.72
Ta.11701.1.A1_at	Os03g59620.1	patatin-like serine hydrolase, putative, expressed	NA	TA100666_4565	n	n	n	up	n	untreated	105.371	81.1136	125.906	89.5861	71.4222	70.4355	25.2615	28.8609	26.7144	16.38	14.4281	19.5421
Ta.11701.1.A1_at	Os03g59620.1	patatin-like serine hydrolase, putative, expressed	NA	TA100666_4565	n	n	n	up	n	treated	97.4317	104.817	104.554	103.633	146.529	119.652	11.8728	20.2335	22.6966	5.62868	3.11255	13.0555
Ta.11704.1.A1_a_at	Os07g14830.1	WD-repeat protein 39, putative, expressed	Putative WD40 protein Ciao1 [Oryza sativa (japonica cultivar-group)]	CA658361	n	n	n	up	n	untreated	177.549	163.868	193.781	163.396	164.107	117.204	25.5767	28.4625	22.297	12.3723	17.3661	65.7796
Ta.11704.1.A1_a_at	Os07g14830.1	WD-repeat protein 39, putative, expressed	Putative WD40 protein Ciao1 [Oryza sativa (japonica cultivar-group)]	CA658361	n	n	n	up	n	treated	159.31	189.382	183.557	202.715	365.381	295.859	29.5581	44.1673	45.5986	8.64997	19.4418	27.5115
Ta.11715.1.A1_at	Os07g48630.1	ETHYLENE-INSENSITIVE3-like 1 protein, putative, expressed	NA	TA107731_4565	n	n	n	up	n	untreated	935.34	463.454	616.517	441.313	318.435	404.609	107.144	130.856	30.7997	77.0829	23.5635	207.815
Ta.11715.1.A1_at	Os07g48630.1	ETHYLENE-INSENSITIVE3-like 1 protein, putative, expressed	NA	TA107731_4565	n	n	n	up	n	treated	904.661	527.033	555.148	641.781	1036.68	702.386	69.2402	153.647	108.584	51.5345	26.6188	70.9205
Ta.11725.2.S1_a_at	Os07g40510.1	formin-2, putative, expressed	NA	TA79177_4565	n	n	n	down	down	untreated	209.933	91.0986	76.6825	142.633	144.293	115.103	43.5911	1.15689	17.9589	51.2995	19.9099	18.976
Ta.11725.2.S1_a_at	Os07g40510.1	formin-2, putative, expressed	NA	TA79177_4565	n	n	n	down	down	treated	174.926	88.0872	62.7449	75.3011	43.7113	40.0079	4.54979	21.2302	14.1821	17.1507	6.01404	4.81098
Ta.11727.1.A1_at	Os01g70790.1	src2-like protein, putative, expressed	NA	TA87159_4565	n	n	n	up	n	untreated	795.988	533.411	498.057	560.52	504.539	716.737	102.618	123.516	20.8358	119.171	76.4566	150.686
Ta.11727.1.A1_at	Os01g70790.1	src2-like protein, putative, expressed	NA	TA87159_4565	n	n	n	up	n	treated	801.367	638.403	681.775	866.104	1819.39	1295.56	286.245	189.415	22.2734	153.435	82.3019	182.295
Ta.11728.1.S1_at	Os02g35170.1	expressed protein	F14N23.19 [Arabidopsis thaliana (Mouse-ear cress)]	TA86613_4565	n	n	n	down	n	untreated	2034.51	1366.01	2621.76	3029.75	1819.56	1618.24	131.091	90.7365	81.303	133.515	148.864	153.409
Ta.11728.1.S1_at	Os02g35170.1	expressed protein	F14N23.19 [Arabidopsis thaliana (Mouse-ear cress)]	TA86613_4565	n	n	n	down	n	treated	2079.63	1372.5	1926.79	1816.96	803.956	927.16	28.0039	357.325	140.392	16.4011	23.1867	59.8869
Ta.11737.1.A1_at	Os02g55050.1	F-box domain containing protein, expressed	NA	TA101969_4565	n	n	n	down	n	untreated	147.406	144.575	184.72	166.157	155.72	132.292	25.1644	14.9655	16.7365	14.4326	11.7899	4.1352
Ta.11737.1.A1_at	Os02g55050.1	F-box domain containing protein, expressed	NA	TA101969_4565	n	n	n	down	n	treated	132.12	129.331	109.067	103.666	52.8002	58.8305	12.047	14.8928	11.2549	7.27098	10.5955	19.0187
Ta.1174.1.S1_x_at	Os01g51570.1	glucan endo-1,3-beta-glucosidase GII precursor, putative, expressed	Beta-1,3-glucanase [Triticum aestivum (Wheat)]	TA65973_4565	n	up	up	n	n	untreated	194.074	226.813	261.285	132.358	88.1399	118.586	57.3861	74.2441	116.791	66.0231	43.0939	148.977
Ta.1174.1.S1_x_at	Os01g51570.1	glucan endo-1,3-beta-glucosidase GII precursor, putative, expressed	Beta-1,3-glucanase [Triticum aestivum (Wheat)]	TA65973_4565	n	up	up	n	n	treated	165.784	1026.99	1666.09	2437.42	279.342	22.9451	37.9169	1380.19	225.768	171.956	133.522	4.73877
Ta.11757.1.S1_at	Os06g45730.1	speckle-type POZ protein, putative, expressed	Zinc finger POZ domain protein-like [Oryza sativa (japonica cultivar-group)]	TA83166_4565	n	n	n	down	n	untreated	51.162	64.4441	61.9122	79.1533	81.1147	62.8339	5.4349	5.69051	8.85305	9.66277	11.5813	3.53873
Ta.11757.1.S1_at	Os06g45730.1	speckle-type POZ protein, putative, expressed	Zinc finger POZ domain protein-like [Oryza sativa (japonica cultivar-group)]	TA83166_4565	n	n	n	down	n	treated	45.5301	66.7656	57.7062	84.5338	34.0619	54.4918	11.0822	21.8302	4.13995	6.61305	3.15225	4.06047
Ta.11773.2.S1_a_at	Os01g01080.2	sphingosine-1-phosphate lyase, putative, expressed	Sphingosine-1-phosphate lyase [Arabidopsis thaliana (Mouse-ear cress)]	CA610745	n	n	n	n	up	untreated	246.742	390.868	515.369	403.445	468.137	384.901	37.0366	60.4094	18.9932	35.3242	55.9471	89.2919
Ta.11773.2.S1_a_at	Os01g01080.2	sphingosine-1-phosphate lyase, putative, expressed	Sphingosine-1-phosphate lyase [Arabidopsis thaliana (Mouse-ear cress)]	CA610745	n	n	n	n	up	treated	225.564	435.031	678.689	531.701	901.126	829.297	20.6414	96.408	25.3283	24.929	102.863	86.8139
Ta.11774.1.A1_at	Os01g11860.1	4-methyl-5-thiazole monophosphate biosynthesis protein, putative, expressed	P0665D10.8 [Oryza sativa (japonica cultivar-group)]	BQ170770	n	n	up	up	up	untreated	319.235	236.736	492.842	416.292	356.587	337.668	45.4138	46.8935	37.7198	76.6274	160.317	145.538
Ta.11774.1.A1_at	Os01g11860.1	4-methyl-5-thiazole monophosphate biosynthesis protein, putative, expressed	P0665D10.8 [Oryza sativa (japonica cultivar-group)]	BQ170770	n	n	up	up	up	treated	283.266	538.745	975.445	1024.3	1563.87	2654.92	139.546	498.775	141.595	84.8395	48.6272	442.143
Ta.11776.1.S1_at	Os12g37910.2	GDSL-motif lipase/hydrolase-like protein, putative, expressed	NA	CD491105	n	n	n	down	n	untreated	144.976	136.64	138.939	138.541	258.087	216.354	17.0515	10.2125	12.7665	7.07936	10.2779	15.7765
Ta.11776.1.S1_at	Os12g37910.2	GDSL-motif lipase/hydrolase-like protein, putative, expressed	NA	CD491105	n	n	n	down	n	treated	131.081	114.611	108.536	77.1607	73.4911	164.79	16.4434	22.0147	8.42847	7.47081	13.8931	12.1953
Ta.11779.1.S1_at	Os10g04620.1	catalytic/ hydrolase, putative, expressed	Lipase, putative [Oryza sativa (japonica cultivar-group)]	TA78007_4565	n	n	n	up	up	untreated	500.594	703.295	619.066	509.803	430.178	391.329	64.9825	168.702	108.649	64.9439	48.808	178.847
Ta.11779.1.S1_at	Os10g04620.1	catalytic/ hydrolase, putative, expressed	Lipase, putative [Oryza sativa (japonica cultivar-group)]	TA78007_4565	n	n	n	up	up	treated	464.464	920.624	669.382	668.697	2661.08	1756.36	41.8284	223.011	176.091	14.0664	385.852	357.081
Ta.1178.1.A1_at	Os07g42420.1	3-oxoacyl-synthase I, chloroplast precursor, putative, expressed	Beta-ketoacyl-ACP synthase II [Elaeis oleifera (Oil palm)]	BJ217956	n	n	n	down	down	untreated	621.042	468.869	574.562	659	539.72	579.492	36.0756	19.4204	26.5826	32.829	10.7319	56.2716
Ta.1178.1.A1_at	Os07g42420.1	3-oxoacyl-synthase I, chloroplast precursor, putative, expressed	Beta-ketoacyl-ACP synthase II [Elaeis oleifera (Oil palm)]	BJ217956	n	n	n	down	down	treated	580.275	497.039	585.297	549.713	240.038	208.236	36.2445	71.4589	17.0951	20.7438	30.0688	16.5419
Ta.1178.3.A1_a_at	Os07g42420.1	3-oxoacyl-synthase I, chloroplast precursor, putative, expressed	Beta-ketoacyl-ACP synthase II [Elaeis oleifera (Oil palm)]	TA85290_4565	n	n	n	down	down	untreated	387.066	274.544	316.042	354.562	301.373	319.683	13.4618	22.3472	31.6512	11.8701	29.3006	22.8442
Ta.1178.3.A1_a_at	Os07g42420.1	3-oxoacyl-synthase I, chloroplast precursor, putative, expressed	Beta-ketoacyl-ACP synthase II [Elaeis oleifera (Oil palm)]	TA85290_4565	n	n	n	down	down	treated	346.031	295.136	313.982	314.33	149.818	122.04	11.7864	46.6301	10.8665	54.3811	25.7966	9.93543
Ta.11785.1.A1_at	Os02g29550.2	DNA binding protein, putative, expressed	Hypothetical protein At4g13040 [Arabidopsis thaliana (Mouse-ear cress)]	TA82376_4565	n	n	n	down	n	untreated	1458.28	975.748	1081.44	1286.16	1520.96	1496.71	76.3403	63.6869	60.2448	108.074	23.5188	197.405
Ta.11785.1.A1_at	Os02g29550.2	DNA binding protein, putative, expressed	Hypothetical protein At4g13040 [Arabidopsis thaliana (Mouse-ear cress)]	TA82376_4565	n	n	n	down	n	treated	1486.87	851.571	872.573	725.296	711.766	1021.92	106.199	72.4147	79.1607	79.675	31.6585	5.6147
Ta.11795.1.S1_at	Os08g04420.1	nodulation receptor kinase precursor, putative, expressed	Putative serine/threonine-specific protein kinase [Oryza sativa (japonica cultivar-group)]	TA95283_4565	n	n	n	up	n	untreated	45.9372	55.9705	63.0984	75.0149	46.8269	39.6263	5.7099	7.43857	8.93069	9.47419	7.20765	4.81518
Ta.11795.1.S1_at	Os08g04420.1	nodulation receptor kinase precursor, putative, expressed	Putative serine/threonine-specific protein kinase [Oryza sativa (japonica cultivar-group)]	TA95283_4565	n	n	n	up	n	treated	50.5564	60.541	62.357	69.4585	278.227	76.6905	4.41041	4.16005	10.5881	6.76795	57.3239	4.66766
Ta.1183.1.S1_at	Os09g25150.1	dihydroflavonol-4-reductase, putative, expressed	Cinnamoyl CoA reductase [Hordeum vulgare (Barley)]	TA75596_4565	n	n	n	down	n	untreated	257.833	1090.04	145.414	142.728	468.575	520.894	95.8477	236.668	10.1479	42.6083	104.05	274.229
Ta.1183.1.S1_at	Os09g25150.1	dihydroflavonol-4-reductase, putative, expressed	Cinnamoyl CoA reductase [Hordeum vulgare (Barley)]	TA75596_4565	n	n	n	down	n	treated	267.726	1002.49	153.004	117.958	107.661	114.429	92.2958	787.738	35.6445	13.9547	3.32059	16.2359
Ta.11832.1.S1_at	Os06g13060.1	chaperone protein dnaJ 16, putative, expressed	ARG1-like protein [Oryza sativa (japonica cultivar-group)]	TA83224_4565	n	n	n	down	down	untreated	156.566	127.652	165.652	197.334	172.866	169.312	52.358	18.6894	16.1612	15.5448	16.4055	46.0449
Ta.11832.1.S1_at	Os06g13060.1	chaperone protein dnaJ 16, putative, expressed	ARG1-like protein [Oryza sativa (japonica cultivar-group)]	TA83224_4565	n	n	n	down	down	treated	129.044	171.663	163.471	205.285	75.4355	67.1165	18.0269	56.7941	24.8431	14.6363	4.8488	10.6892
Ta.11839.1.S1_a_at	NA	NA	Thioredoxin M-like [Oryza sativa (japonica cultivar-group)]	TA102409_4565	n	n	n	down	n	untreated	2200.44	1386.51	1172.64	1794.01	1564.42	1850.92	13.7683	46.5161	197.544	334.576	219.818	543.508
Ta.11839.1.S1_a_at	NA	NA	Thioredoxin M-like [Oryza sativa (japonica cultivar-group)]	TA102409_4565	n	n	n	down	n	treated	2189.92	1131.34	1250.27	1247.05	501.684	773.586	118.552	129.533	480.86	237.15	19.617	102.952
Ta.11839.1.S1_x_at	Os01g73234.1	thioredoxin-like protein slr0233, putative, expressed	Thioredoxin M-like [Oryza sativa (japonica cultivar-group)]	TA86527_4565	n	n	n	down	n	untreated	1693.9	1169.8	970.303	1473.21	1219.69	1567.76	129.119	32.8551	150.679	245.371	183.171	533.563
Ta.11839.1.S1_x_at	Os01g73234.1	thioredoxin-like protein slr0233, putative, expressed	Thioredoxin M-like [Oryza sativa (japonica cultivar-group)]	TA86527_4565	n	n	n	down	n	treated	1745.76	945.343	978.029	1157.19	467.051	720.798	89.2773	149.634	254.329	208.039	46.4054	100.224
Ta.11839.2.S1_at	Os01g73234.1	thioredoxin-like protein slr0233, putative, expressed	Thioredoxin M-like [Oryza sativa (japonica cultivar-group)]	CA620145	n	n	n	down	n	untreated	1383.89	924.729	846.703	1115.29	1053.58	1132.54	67.859	29.742	109.239	119.367	131.288	276.579
Ta.11839.2.S1_at	Os01g73234.1	thioredoxin-like protein slr0233, putative, expressed	Thioredoxin M-like [Oryza sativa (japonica cultivar-group)]	CA620145	n	n	n	down	n	treated	1417.25	691.164	774.952	737.196	317.349	464.555	84.3255	62.7693	191.097	113.576	20.7425	48.1744
Ta.11839.3.S1_a_at	Os01g73234.1	thioredoxin-like protein slr0233, putative, expressed	Thioredoxin M-like [Oryza sativa (japonica cultivar-group)]	TA86527_4565	n	n	n	down	n	untreated	2085.06	1322.96	1234.08	1892.88	1464.99	1683.48	168.85	102.612	196.421	364.302	172.866	550.007
Ta.11839.3.S1_a_at	Os01g73234.1	thioredoxin-like protein slr0233, putative, expressed	Thioredoxin M-like [Oryza sativa (japonica cultivar-group)]	TA86527_4565	n	n	n	down	n	treated	2157.45	994.711	1221.24	1141.33	422.888	616.763	233.612	120.019	484.071	196.571	22.326	69.0005
Ta.11839.3.S1_x_at	Os01g73234.1	thioredoxin-like protein slr0233, putative, expressed	Thioredoxin M-like [Oryza sativa (japonica cultivar-group)]	CA623947	n	n	n	down	n	untreated	471.294	326.668	309.449	433.333	353.481	388.274	59.727	8.64232	54.3232	78.7675	31.9696	116.882
Ta.11839.3.S1_x_at	Os01g73234.1	thioredoxin-like protein slr0233, putative, expressed	Thioredoxin M-like [Oryza sativa (japonica cultivar-group)]	CA623947	n	n	n	down	n	treated	485.397	270.292	312.692	297.207	119.852	196.552	41.5037	32.7411	85.9082	48.0715	7.03347	22.2523
Ta.11849.1.S1_at	Os06g51260.1	expressed protein	Putative MYB transcription factor [Oryza sativa (japonica cultivar-group)]	TA78471_4565	n	n	n	down	down	untreated	3927	1940.5	110.658	49.4942	3951.61	3666.89	502.812	376.594	35.8137	19.4275	291.866	336.645
Ta.11849.1.S1_at	Os06g51260.1	expressed protein	Putative MYB transcription factor [Oryza sativa (japonica cultivar-group)]	TA78471_4565	n	n	n	down	down	treated	3656.06	1153.65	84.4622	35.8671	1360.6	1377.53	367.453	959.222	1.40389	6.11029	45.0946	306.243
Ta.11853.2.S1_at	Os03g57320.1	expp1 protein precursor, putative, expressed	Expressed protein [Oryza sativa (japonica cultivar-group)]	CA666021	n	n	n	up	n	untreated	211.402	231.511	177.193	195.432	226.866	239.085	30.3633	15.5537	10.9338	10.51	18.9966	28.2718
Ta.11853.2.S1_at	Os03g57320.1	expp1 protein precursor, putative, expressed	Expressed protein [Oryza sativa (japonica cultivar-group)]	CA666021	n	n	n	up	n	treated	219.252	250.602	233.889	310.764	460.381	408.262	13.9687	46.1677	12.2788	7.89868	41.9096	24.6374
Ta.11853.2.S1_x_at	Os03g57320.1	expp1 protein precursor, putative, expressed	Expressed protein [Oryza sativa (japonica cultivar-group)]	CA666021	n	n	n	up	n	untreated	159.262	155.764	137.588	162.15	170.529	170.687	7.5602	14.5469	12.7794	11.7174	13.8126	30.2389
Ta.11853.2.S1_x_at	Os03g57320.1	expp1 protein precursor, putative, expressed	Expressed protein [Oryza sativa (japonica cultivar-group)]	CA666021	n	n	n	up	n	treated	161.981	189.096	166.119	215.379	351.33	303.991	9.20013	27.5029	10.6342	21.8591	30.225	10.8636
Ta.11856.2.S1_a_at	Os01g56300.1	expressed protein	B1143G03.11 [Oryza sativa (japonica cultivar-group)]	CK161307	n	n	n	down	down	untreated	1272.47	797.927	540.628	665.434	979.255	815.871	581.383	54.8646	22.3873	47.8907	107.364	81.2588
Ta.11856.2.S1_a_at	Os01g56300.1	expressed protein	B1143G03.11 [Oryza sativa (japonica cultivar-group)]	CK161307	n	n	n	down	down	treated	1132.22	590.946	398.822	448.586	403.389	384.955	332.722	141.042	23.5252	23.0815	44.7641	48.8786
Ta.11872.1.S1_at	Os12g19394.1	ribulose bisphosphate carboxylase small chain C, chloroplast precursor, putative, expressed	Ribulose bisphosphate carboxylase small chains, chloroplast precursor (EC 4.1.1.39) (RuBisCO small subunits) [Contains: Ribulose bisphosphate carboxylase small chain P1; Ribulose bisphosphate carboxylase small chain P2; Ribulose bisphosphate carboxylase s	TA53603_4565	n	n	n	down	n	untreated	124.798	131.957	93.3168	75.3638	172.145	172.434	17.4867	14.7122	4.82131	4.38142	8.92191	24.1017
Ta.11872.1.S1_at	Os12g19394.1	ribulose bisphosphate carboxylase small chain C, chloroplast precursor, putative, expressed	Ribulose bisphosphate carboxylase small chains, chloroplast precursor (EC 4.1.1.39) (RuBisCO small subunits) [Contains: Ribulose bisphosphate carboxylase small chain P1; Ribulose bisphosphate carboxylase small chain P2; Ribulose bisphosphate carboxylase s	TA53603_4565	n	n	n	down	n	treated	114.266	99.4618	61.921	58.4948	52.7371	78.8566	22.4779	28.4776	5.48366	4.29019	12.19	19.406
Ta.11872.1.S1_x_at	Os12g19394.1	ribulose bisphosphate carboxylase small chain C, chloroplast precursor, putative, expressed	Ribulose bisphosphate carboxylase small chains, chloroplast precursor (EC 4.1.1.39) (RuBisCO small subunits) [Contains: Ribulose bisphosphate carboxylase small chain P1; Ribulose bisphosphate carboxylase small chain P2; Ribulose bisphosphate carboxylase s	TA53603_4565	n	n	n	down	down	untreated	102.478	105.762	77.766	67.1388	144.855	148.032	5.43357	12.7266	7.73903	3.13561	16.2433	12.4171
Ta.11872.1.S1_x_at	Os12g19394.1	ribulose bisphosphate carboxylase small chain C, chloroplast precursor, putative, expressed	Ribulose bisphosphate carboxylase small chains, chloroplast precursor (EC 4.1.1.39) (RuBisCO small subunits) [Contains: Ribulose bisphosphate carboxylase small chain P1; Ribulose bisphosphate carboxylase small chain P2; Ribulose bisphosphate carboxylase s	TA53603_4565	n	n	n	down	down	treated	98.894	88.6264	56.6658	52.4571	52.0033	67.2545	12.6884	31.3284	9.38759	7.10355	6.7164	8.10042
Ta.11874.1.S1_at	Os02g13200.1	expressed protein	Genomic DNA, chromosome 5, P1 clone:MNB8 [Arabidopsis thaliana (Mouse-ear cress)]	TA82471_4565	n	n	n	up	n	untreated	298.623	502.687	419.508	433.859	330.563	323.487	28.0064	3.7521	3.91363	33.5587	49.1132	103.891
Ta.11874.1.S1_at	Os02g13200.1	expressed protein	Genomic DNA, chromosome 5, P1 clone:MNB8 [Arabidopsis thaliana (Mouse-ear cress)]	TA82471_4565	n	n	n	up	n	treated	262.657	572.81	522.137	610.731	762.116	793.285	16.1226	87.6077	25.4243	14.8327	28.48	30.2564
Ta.11875.1.A1_at	Os07g31884.1	transparent testa 12 protein, putative, expressed	Putative MATE efflux protein family protein [Oryza sativa (japonica cultivar-group)]	TA100434_4565	n	n	n	down	down	untreated	333.593	331.018	291.197	234.712	359.474	365.803	14.8482	23.6814	16.2306	29.5948	4.71871	9.69802
Ta.11875.1.A1_at	Os07g31884.1	transparent testa 12 protein, putative, expressed	Putative MATE efflux protein family protein [Oryza sativa (japonica cultivar-group)]	TA100434_4565	n	n	n	down	down	treated	317.034	223.242	300.074	137.448	69.5898	142.005	7.04269	99.0309	34.5903	13.1077	8.79408	22.1346
Ta.11877.1.A1_a_at	Os09g04210.2	hydrolase/ zinc ion binding protein, putative, expressed	At5g24670 [Arabidopsis thaliana (Mouse-ear cress)]	BJ272310	n	n	down	down	n	untreated	71.9062	59.5133	93.4612	156.877	86.5361	75.9852	27.64	8.83325	11.5702	22.5597	5.95122	3.28461
Ta.11877.1.A1_a_at	Os09g04210.2	hydrolase/ zinc ion binding protein, putative, expressed	At5g24670 [Arabidopsis thaliana (Mouse-ear cress)]	BJ272310	n	n	down	down	n	treated	72.1429	59.2337	73.8834	68.3277	33.055	48.6471	6.73734	18.2323	11.702	6.80143	5.56862	1.93004
Ta.1188.1.S1_at	Os12g07590.1	receptor-type tyrosine-protein phosphatase S precursor, putative, expressed	Protein-tyrosine phosphatase [Oryza sativa (japonica cultivar-group)]	TA82477_4565	n	n	up	up	n	untreated	183.179	155.191	125.32	129.754	141.442	138.527	1.38388	24.9206	13.2751	10.4033	22.0491	70.6849
Ta.1188.1.S1_at	Os12g07590.1	receptor-type tyrosine-protein phosphatase S precursor, putative, expressed	Protein-tyrosine phosphatase [Oryza sativa (japonica cultivar-group)]	TA82477_4565	n	n	up	up	n	treated	166.534	244.827	238.3	406.576	931.088	482.879	27.6717	156.79	38.2524	1.96911	36.1437	26.9099
Ta.11886.1.A1_at	Os05g43590.1	protein Z, putative	Transposon protein, putative, unclassified [Oryza sativa (japonica cultivar-group)]	BQ170990	n	n	n	n	up	untreated	15.7505	15.3812	15.0673	15.4271	16.4325	16.1269	2.14826	0.915163	0.273382	0.547992	2.71764	1.37351
Ta.11886.1.A1_at	Os05g43590.1	protein Z, putative	Transposon protein, putative, unclassified [Oryza sativa (japonica cultivar-group)]	BQ170990	n	n	n	n	up	treated	17.6032	15.5779	17.4168	17.0505	29.6187	124.952	2.57583	1.84106	1.73367	1.03685	6.73465	66.6156
Ta.11893.1.A1_at	Os12g18900.1	cysteine desulfurase, putative, expressed	T27G7.17 [Arabidopsis thaliana (Mouse-ear cress)]	TA77338_4565	n	n	n	down	n	untreated	1254.15	914.297	1337.22	1447.08	1127.46	1331.82	109.574	116.389	64.2145	152.982	43.809	226.31
Ta.11893.1.A1_at	Os12g18900.1	cysteine desulfurase, putative, expressed	T27G7.17 [Arabidopsis thaliana (Mouse-ear cress)]	TA77338_4565	n	n	n	down	n	treated	1249.83	885.353	1078.06	1075.79	505.293	753.252	74.1543	193.91	65.9603	54.5394	17.3077	64.727
Ta.11895.1.S1_at	Os02g47640.1	tubby-like protein, putative, expressed	Putative tubby-like protein [Oryza sativa (japonica cultivar-group)]	TA82235_4565	n	n	n	n	down	untreated	165.4	201.083	86.4598	93.9886	197.738	197.516	10.6766	25.5274	11.0694	3.71371	12.1668	14.4385
Ta.11895.1.S1_at	Os02g47640.1	tubby-like protein, putative, expressed	Putative tubby-like protein [Oryza sativa (japonica cultivar-group)]	TA82235_4565	n	n	n	n	down	treated	176.307	195.435	114.346	105.916	109.457	69.9951	7.96806	81.2857	7.01272	4.12625	3.31981	15.677
Ta.11908.1.S1_at	Os09g26310.1	hypro1, putative, expressed	NA	TA89629_4565	n	n	n	up	up	untreated	115.379	121.1	138.975	119.513	124.92	139.74	23.4117	19.9758	6.03154	13.0406	8.1773	23.7456
Ta.11908.1.S1_at	Os09g26310.1	hypro1, putative, expressed	NA	TA89629_4565	n	n	n	up	up	treated	139.569	142.079	159.051	228.456	1031.68	1228.61	23.8102	38.6418	12.8692	49.5144	189.404	289.164
Ta.11913.1.A1_at	Os02g58790.1	expressed protein	Expressed protein [Arabidopsis thaliana (Mouse-ear cress)]	BQ171053	n	n	down	down	down	untreated	1112.95	417.063	419.679	610.865	773.903	847.09	103.131	86.831	17.5189	208.466	59.8509	426.39
Ta.11913.1.A1_at	Os02g58790.1	expressed protein	Expressed protein [Arabidopsis thaliana (Mouse-ear cress)]	BQ171053	n	n	down	down	down	treated	1159.81	278.723	261.617	215.355	61.4446	68.2701	109.176	110.773	113.263	84.1013	7.39601	3.99785
Ta.11919.1.S1_at	Os02g45930.1	expressed protein	OSJNBa0088A01.13 protein [Oryza sativa (japonica cultivar-group)]	TA90427_4565	n	n	n	down	n	untreated	4470.47	3239.84	1550.63	1864.77	2300.86	3565.01	645.453	1312.98	83.6844	75.1572	464.5	907.121
Ta.11919.1.S1_at	Os02g45930.1	expressed protein	OSJNBa0088A01.13 protein [Oryza sativa (japonica cultivar-group)]	TA90427_4565	n	n	n	down	n	treated	4869.44	2542.22	990.599	951.71	810.313	2548.11	565.915	1532.61	230.65	64.3057	57.245	672.353
Ta.11919.2.S1_a_at	Os02g45930.1	expressed protein	OSJNBa0088A01.13 protein [Oryza sativa (japonica cultivar-group)]	TA95807_4565	n	n	down	down	n	untreated	3011.41	2218.72	638.587	1052.74	1446.15	2555.29	382.554	955.091	83.1401	35.2656	320.386	948.753
Ta.11919.2.S1_a_at	Os02g45930.1	expressed protein	OSJNBa0088A01.13 protein [Oryza sativa (japonica cultivar-group)]	TA95807_4565	n	n	down	down	n	treated	3264.77	1781.25	306.935	504.001	458.364	2067.21	447.561	1246.47	71.9092	21.535	35.3385	712.806
Ta.11919.2.S1_x_at	Os02g45930.1	expressed protein	OSJNBa0088A01.13 protein [Oryza sativa (japonica cultivar-group)]	TA95807_4565	n	n	down	down	n	untreated	1912.49	1462.76	485.254	722.58	979.667	1694.14	204.219	530.37	91.77	21.3197	178.917	628.037
Ta.11919.2.S1_x_at	Os02g45930.1	expressed protein	OSJNBa0088A01.13 protein [Oryza sativa (japonica cultivar-group)]	TA95807_4565	n	n	down	down	n	treated	1973.65	1162.5	231.369	335.433	321.425	1426.62	232.268	777.418	46.3752	9.97687	15.3914	437.605
Ta.1192.2.S1_s_at	Os04g43540.1	60 ribosomal protein L14, putative, expressed	OSJNBb0070J16.13 protein [Oryza sativa (japonica cultivar-group)]	DN829221	n	n	n	down	n	untreated	4407.55	5624.98	4066.72	6432.11	5300.39	5424.15	809.582	932.877	379.181	436.979	528.107	657.549
Ta.1192.2.S1_s_at	Os04g43540.1	60 ribosomal protein L14, putative, expressed	OSJNBb0070J16.13 protein [Oryza sativa (japonica cultivar-group)]	DN829221	n	n	n	down	n	treated	3978.66	5976.64	5401.85	7343.07	1865.02	3622.76	539.894	1059.83	538.555	326.151	482.842	813.091
Ta.11927.1.S1_at	Os09g33900.1	oxidoreductase, putative, expressed	Hypothetical protein P0450E05.15-1 [Oryza sativa (japonica cultivar-group)]	TA88060_4565	n	n	n	down	n	untreated	544.293	389.841	539.4	794.98	615.751	414.122	67.9293	28.3897	56.6221	42.2036	64.2435	104.854
Ta.11927.1.S1_at	Os09g33900.1	oxidoreductase, putative, expressed	Hypothetical protein P0450E05.15-1 [Oryza sativa (japonica cultivar-group)]	TA88060_4565	n	n	n	down	n	treated	515.091	464.965	512.862	765.175	261.328	301.773	82.7326	273.585	117.961	12.6755	38.791	39.9277
Ta.11929.1.A1_at	Os03g46140.1	F-box domain containing protein	OSJNBb0021I10.9 protein [Oryza sativa (japonica cultivar-group)]	BQ171086	n	n	n	up	up	untreated	140.639	153.621	184.95	148.224	132.377	143.879	21.2395	22.3907	2.52427	10.2156	12.8193	43.6423
Ta.11929.1.A1_at	Os03g46140.1	F-box domain containing protein	OSJNBb0021I10.9 protein [Oryza sativa (japonica cultivar-group)]	BQ171086	n	n	n	up	up	treated	138.489	200.781	204.854	219.223	380.954	397.599	25.0575	35.2301	39.7231	29.0948	32.5063	39.8659
Ta.11930.1.S1_at	Os10g37330.1	aldo-keto reductase/ oxidoreductase, putative, expressed	Putative aldo/keto reductase [Oryza sativa (Rice)]	TA87559_4565	n	n	down	down	down	untreated	375.028	190.77	139.223	202.68	274.762	308.137	4.65619	24.556	12.8773	40.1089	36.6896	121.913
Ta.11930.1.S1_at	Os10g37330.1	aldo-keto reductase/ oxidoreductase, putative, expressed	Putative aldo/keto reductase [Oryza sativa (Rice)]	TA87559_4565	n	n	down	down	down	treated	359.869	121.403	113.202	90.3013	39.3931	54.5715	25.808	36.6282	34.1633	15.0651	0.550724	10.8432
Ta.11932.1.S1_s_at	Os03g13590.1	CONSTANS interacting protein 6, putative, expressed	NA	TA73411_4565	n	n	n	up	n	untreated	271.396	194.329	223.304	232.671	128.773	127.399	30.11	19.1089	57.2896	57.1137	16.8115	53.5207
Ta.11932.1.S1_s_at	Os03g13590.1	CONSTANS interacting protein 6, putative, expressed	NA	TA73411_4565	n	n	n	up	n	treated	249.298	271.024	331.05	314.054	420.407	324.791	35.3969	49.0211	63.1073	32.9054	20.8189	46.3882
Ta.11949.1.A1_at	Os05g07680.1	CENP-E like kinetochore protein, putative, expressed	Putative CENP-E like kinetochore protein [Hordeum vulgare (Barley)]	TA87958_4565	n	n	n	down	n	untreated	40.0504	45.11	41.1286	53.553	38.6134	32.9635	5.21733	8.08029	14.9054	11.9154	3.48555	12.5891
Ta.11949.1.A1_at	Os05g07680.1	CENP-E like kinetochore protein, putative, expressed	Putative CENP-E like kinetochore protein [Hordeum vulgare (Barley)]	TA87958_4565	n	n	n	down	n	treated	44.5425	34.8085	31.9317	26.5158	15.8454	13.3418	13.7469	10.3348	3.89169	5.05586	0.865568	1.19105
Ta.11953.1.A1_at	Os01g18100.1	rhomboid domain containing 1, putative, expressed	NA	BQ171141	n	n	n	up	n	untreated	20.0649	30.8909	38.3135	34.6463	25.0491	27.3482	2.65188	6.03286	3.43375	4.74331	2.89325	2.51015
Ta.11953.1.A1_at	Os01g18100.1	rhomboid domain containing 1, putative, expressed	NA	BQ171141	n	n	n	up	n	treated	18.1069	29.9422	32.4345	33.3868	51.2773	43.9475	0.552344	6.01116	3.99706	3.9526	6.62221	5.24715
Ta.11954.1.A1_at	Os11g33300.1	O-methyltransferase ZRP4, putative	O-methyltransferase ZRP4 [Zea mays (Maize)]	TA70110_4565	n	n	down	down	down	untreated	227.829	872.121	1664.38	1241.97	295.2	128.789	63.8227	132.685	106.921	125.604	63.1479	32.2014
Ta.11954.1.A1_at	Os11g33300.1	O-methyltransferase ZRP4, putative	O-methyltransferase ZRP4 [Zea mays (Maize)]	TA70110_4565	n	n	down	down	down	treated	222.545	630.987	1280.41	589.022	15.3764	12.174	100.179	126.602	167.864	94.1457	2.35437	1.39604
Ta.1197.1.S1_at	Os01g63270.1	alpha-glucan phosphorylase, H isozyme, putative, expressed	Alpha 1,4-glucan phosphorylase H isozyme [Oryza sativa (Rice)]	CK162391	n	n	n	down	n	untreated	447.499	958.893	624.426	852.714	486.502	713.539	43.6654	289.26	114.394	320.065	72.0087	293.435
Ta.1197.1.S1_at	Os01g63270.1	alpha-glucan phosphorylase, H isozyme, putative, expressed	Alpha 1,4-glucan phosphorylase H isozyme [Oryza sativa (Rice)]	CK162391	n	n	n	down	n	treated	452.194	572.745	696	821.582	207.023	249.263	66.9788	135.13	310.626	202.617	17.3477	55.7866
Ta.1197.1.S1_x_at	Os01g63270.1	alpha-glucan phosphorylase, H isozyme, putative, expressed	Cytosolic starch phosphorylase [Triticum aestivum (Wheat)]	TA64049_4565	n	n	n	down	n	untreated	512.487	1166.26	800.613	1070.39	564.853	845.448	89.3908	371.878	178.462	451.453	85.742	371.819
Ta.1197.1.S1_x_at	Os01g63270.1	alpha-glucan phosphorylase, H isozyme, putative, expressed	Cytosolic starch phosphorylase [Triticum aestivum (Wheat)]	TA64049_4565	n	n	n	down	n	treated	508.925	724.938	848.85	1001.03	244.459	257.473	91.4007	211.24	353.745	207.223	26.4124	70.4137
Ta.1200.1.S1_at	Os03g08060.2	elongation factor 1-alpha, putative, expressed	T6D22.2 [Arabidopsis thaliana (Mouse-ear cress)]	TA55908_4565	n	n	n	up	n	untreated	4129.4	5178.69	6163.19	5283.76	2805.91	2543.96	1644.14	2419.58	697.923	1916.9	497.355	2628.14
Ta.1200.1.S1_at	Os03g08060.2	elongation factor 1-alpha, putative, expressed	T6D22.2 [Arabidopsis thaliana (Mouse-ear cress)]	TA55908_4565	n	n	n	up	n	treated	3520.19	8719.55	10648.7	8258.32	14578	10977.9	485.773	2507.13	2091.59	168.202	3645.37	2089.11
Ta.1200.1.S1_x_at	Os03g08060.2	elongation factor 1-alpha, putative, expressed	T6D22.2 [Arabidopsis thaliana (Mouse-ear cress)]	TA55908_4565	n	n	n	up	n	untreated	3027.42	3805.86	4551.07	3891.57	2053.64	1840.92	1260.25	1804.05	492.485	1408.87	383.053	1909.45
Ta.1200.1.S1_x_at	Os03g08060.2	elongation factor 1-alpha, putative, expressed	T6D22.2 [Arabidopsis thaliana (Mouse-ear cress)]	TA55908_4565	n	n	n	up	n	treated	2578.74	6458.82	8151.69	6132.14	11364.4	8120.75	405.407	1797.33	1778.73	235.244	2964.47	1502.1
Ta.12004.1.A1_at	Os01g74190.1	expressed protein	Radical SAM domain-containing protein-like [Oryza sativa (japonica cultivar-group)]	TA76847_4565	n	n	n	down	down	untreated	347.849	127.043	182.421	287.665	251.65	521.24	41.666	24.3998	43.3878	104.884	18.3489	227.91
Ta.12004.1.A1_at	Os01g74190.1	expressed protein	Radical SAM domain-containing protein-like [Oryza sativa (japonica cultivar-group)]	TA76847_4565	n	n	n	down	down	treated	321.838	117.39	141.213	159.814	39.8351	73.1691	18.9748	26.4852	36.7764	24.6269	3.52371	12.8929
Ta.12006.1.A1_at	Os07g38530.1	protein kinase domain containing protein, expressed	Mitogen activated protein kinase kinase [Oryza sativa (japonica cultivar-group)]	TA77348_4565	n	n	n	up	n	untreated	587.813	453.654	488.028	602.47	537.503	467.856	73.1257	79.3257	49.5875	82.3433	4.09916	48.1764
Ta.12006.1.A1_at	Os07g38530.1	protein kinase domain containing protein, expressed	Mitogen activated protein kinase kinase [Oryza sativa (japonica cultivar-group)]	TA77348_4565	n	n	n	up	n	treated	555.44	686.179	656.744	1173.45	1322.63	805.05	37.1629	361.829	14.9215	32.3671	39.2981	62.2335
Ta.12007.2.S1_at	Os01g49580.1	protein kinase domain containing protein, expressed	Receptor serine/threonine kinase PR5K-like [Oryza sativa (japonica cultivar-group)]	BG907089	n	up	up	up	n	untreated	188.478	149.063	176.293	107.603	98.4936	140.975	32.8458	33.5476	29.525	28.9192	25.3728	140.481
Ta.12007.2.S1_at	Os01g49580.1	protein kinase domain containing protein, expressed	Receptor serine/threonine kinase PR5K-like [Oryza sativa (japonica cultivar-group)]	BG907089	n	up	up	up	n	treated	187.924	555.946	999.479	1073.47	1531.99	799.836	41.0502	466.642	80.8772	46.1664	133.736	137.779
Ta.12015.1.S1_at	Os09g39390.1	aldo-keto reductase/ oxidoreductase, putative, expressed	Expressed protein [Arabidopsis thaliana (Mouse-ear cress)]	TA79905_4565	n	n	n	down	down	untreated	774.534	428.242	340.247	447.752	642.655	633.186	70.1217	69.213	42.329	142.16	40.9565	217.968
Ta.12015.1.S1_at	Os09g39390.1	aldo-keto reductase/ oxidoreductase, putative, expressed	Expressed protein [Arabidopsis thaliana (Mouse-ear cress)]	TA79905_4565	n	n	n	down	down	treated	794.036	298.635	226.432	222.32	62.4113	84.3437	49.2191	75.0421	61.9628	18.9202	4.42594	16.2381
Ta.12019.1.A1_at	Os08g01740.2	protein transporter, putative, expressed	Hypothetical protein P0007D08.9 [Oryza sativa (japonica cultivar-group)]	TA79605_4565	n	n	n	up	n	untreated	151.348	164.674	222.992	129.159	85.5092	73.4469	39.0838	52.7274	34.6484	21.1182	6.38429	26.672
Ta.12019.1.A1_at	Os08g01740.2	protein transporter, putative, expressed	Hypothetical protein P0007D08.9 [Oryza sativa (japonica cultivar-group)]	TA79605_4565	n	n	n	up	n	treated	125.831	184.222	179.918	167.254	199.894	124.009	32.903	28.8215	25.9	6.79837	8.62497	28.3366
Ta.12021.1.A1_at	Os07g49460.3	two-component response regulator-like PRR37, putative, expressed	Pseudo-response regulator PPD-H1 [Hordeum spontaneum (Barley)]	TA108488_4565	n	n	n	down	down	untreated	677.203	702.956	833.887	860.618	1141.23	1008.84	101.481	135.735	68.1084	187.104	63.8308	209.569
Ta.12021.1.A1_at	Os07g49460.3	two-component response regulator-like PRR37, putative, expressed	Pseudo-response regulator PPD-H1 [Hordeum spontaneum (Barley)]	TA108488_4565	n	n	n	down	down	treated	590.105	625.099	689.213	563.858	417.013	460.093	84.4369	57.5585	94.48	77.7518	39.5784	58.0937
Ta.12037.1.S1_at	Os03g12460.1	conserved oligomeric complex COG6 family protein, expressed	Hypothetical protein OSJNBa0081P02.14 [Oryza sativa (japonica cultivar-group)]	TA77506_4565	n	n	n	up	n	untreated	300.641	1029.08	441.307	408.992	291.508	296.452	32.1969	106.312	24.181	9.11801	40.6928	99.3961
Ta.12037.1.S1_at	Os03g12460.1	conserved oligomeric complex COG6 family protein, expressed	Hypothetical protein OSJNBa0081P02.14 [Oryza sativa (japonica cultivar-group)]	TA77506_4565	n	n	n	up	n	treated	275.047	993.869	631.069	685.676	682.232	443.999	14.0017	264.583	28.6278	18.6436	42.5245	15.3625
Ta.12039.1.A1_at	Os05g49380.1	protease Do-like 1, chloroplast precursor, putative, expressed	Putative DegP protease [Oryza sativa (japonica cultivar-group)]	TA82706_4565	n	n	n	down	n	untreated	5383.92	3565.69	4681.85	4918.8	5103.38	4832.8	57.1049	547.88	145.155	241.678	393.099	520.563
Ta.12039.1.A1_at	Os05g49380.1	protease Do-like 1, chloroplast precursor, putative, expressed	Putative DegP protease [Oryza sativa (japonica cultivar-group)]	TA82706_4565	n	n	n	down	n	treated	5428.14	2929.33	3903.25	3419.39	2272.3	4410.87	71.9083	332.794	247.619	185.371	79.7457	187.128
Ta.1204.1.S1_at	Os03g61820.1	flap endonuclease 1b, putative, expressed	Flap endonuclease 1b [Oryza sativa (Rice)]	TA92503_4565	n	n	down	down	n	untreated	273.265	103.522	242.67	293.921	239.484	321.86	30.6741	13.8291	26.1171	23.6709	16.0043	91.4341
Ta.1204.1.S1_at	Os03g61820.1	flap endonuclease 1b, putative, expressed	Flap endonuclease 1b [Oryza sativa (Rice)]	TA92503_4565	n	n	down	down	n	treated	248.26	99.57	169.903	136.38	76.5559	127.948	22.021	23.2301	9.70796	10.1983	4.72065	21.9256
Ta.12041.2.A1_at	Os01g31680.1	expressed protein	OsTATC protein [Oryza sativa (japonica cultivar-group)]	TA59436_4565	n	n	n	down	n	untreated	3735.05	3455.55	3633.33	3275.27	3322.92	3485.79	286.739	338.615	112.75	430.867	36.2789	497.658
Ta.12041.2.A1_at	Os01g31680.1	expressed protein	OsTATC protein [Oryza sativa (japonica cultivar-group)]	TA59436_4565	n	n	n	down	n	treated	3780.73	2874.33	3021.64	2399.93	1640.38	1894.78	156.915	428.692	302.945	19.2964	129.459	200.715
Ta.12045.1.S1_at	Os08g23870.1	seed maturation protein, putative, expressed	NA	CA676966	n	n	down	down	n	untreated	624.313	214.078	91.0746	108.168	504.784	387.947	137.071	26.8974	28.1716	19.7205	145.032	161.987
Ta.12045.1.S1_at	Os08g23870.1	seed maturation protein, putative, expressed	NA	CA676966	n	n	down	down	n	treated	574.656	129.158	50.5167	53.3703	57.7358	285.484	76.9121	63.0824	8.61691	9.11522	8.66537	85.7257
Ta.12048.1.A1_at	Os06g51470.1	expressed protein	Hypothetical protein At3g45050/F14D17_120 [Arabidopsis thaliana (Mouse-ear cress)]	TA98598_4565	n	n	n	down	down	untreated	507.073	108.157	190.988	584.261	416.996	616.698	31.5006	12.6492	57.3983	236.424	78.1601	332.469
Ta.12048.1.A1_at	Os06g51470.1	expressed protein	Hypothetical protein At3g45050/F14D17_120 [Arabidopsis thaliana (Mouse-ear cress)]	TA98598_4565	n	n	n	down	down	treated	506.571	95.9757	130.083	219.118	47.6964	48.8483	51.0378	66.2364	55.5722	75.1731	4.53856	11.3604
Ta.1205.1.S1_at	Os05g05200.1	GUP1, putative, expressed	NA	TA85984_4565	n	n	n	up	n	untreated	308.463	396.302	340.392	360.791	328.139	296.994	38.0592	75.1553	12.0236	15.6876	23.0429	43.4782
Ta.1205.1.S1_at	Os05g05200.1	GUP1, putative, expressed	NA	TA85984_4565	n	n	n	up	n	treated	274.823	432.459	371.754	476.728	672.059	575.497	22.7067	44.9002	47.6238	18.5151	25.0877	28.419
Ta.1205.2.S1_at	Os05g05200.1	GUP1, putative, expressed	Hypothetical protein At1g57600 [Arabidopsis thaliana (Mouse-ear cress)]	TA85983_4565	n	n	n	up	up	untreated	184.488	252.257	222.435	248.367	211.377	167.568	12.4949	43.3112	12.5587	26.8749	27.6286	22.0255
Ta.1205.2.S1_at	Os05g05200.1	GUP1, putative, expressed	Hypothetical protein At1g57600 [Arabidopsis thaliana (Mouse-ear cress)]	TA85983_4565	n	n	n	up	up	treated	165.723	273.737	269.094	308.541	438.139	347.101	18.5599	30.5689	16.2737	12.2228	18.7175	21.0829
Ta.12050.1.A1_at	Os04g10350.1	1-aminocyclopropane-1-carboxylate oxidase, putative, expressed	OSJNBa0027O01.11 protein [Oryza sativa (japonica cultivar-group)]	TA108056_4565	n	n	n	down	n	untreated	915.696	606.47	455.437	789.139	730.173	708.359	85.0085	117.63	40.3572	157.381	37.7376	171.577
Ta.12050.1.A1_at	Os04g10350.1	1-aminocyclopropane-1-carboxylate oxidase, putative, expressed	OSJNBa0027O01.11 protein [Oryza sativa (japonica cultivar-group)]	TA108056_4565	n	n	n	down	n	treated	913.535	488.443	407.984	523.024	270.723	457.403	12.8877	28.5222	84.244	87.2878	18.8559	46.4319
Ta.12051.1.A1_at	Os04g30490.1	transparent testa 12 protein, putative, expressed	OSJNBa0069D17.7 protein [Oryza sativa (japonica cultivar-group)]	TA104640_4565	n	n	n	up	n	untreated	32.7036	27.8683	54.5575	55.3531	41.4074	29.7538	7.02853	2.4982	14.5985	5.79166	6.10484	3.78951
Ta.12051.1.A1_at	Os04g30490.1	transparent testa 12 protein, putative, expressed	OSJNBa0069D17.7 protein [Oryza sativa (japonica cultivar-group)]	TA104640_4565	n	n	n	up	n	treated	25.8921	35.8175	49.5177	41.6102	95.2717	50.7586	3.39329	9.65764	7.47194	4.09218	16.2656	5.36983
Ta.12059.1.S1_at	Os02g28300.1	transferase, putative	OSJNBa0035M09.5 protein [Oryza sativa (japonica cultivar-group)]	BE604060	n	n	n	up	up	untreated	310.607	519.428	216.297	197.109	229.656	258.215	72.6576	98.775	12.1512	10.8105	12.9033	53.1702
Ta.12059.1.S1_at	Os02g28300.1	transferase, putative	OSJNBa0035M09.5 protein [Oryza sativa (japonica cultivar-group)]	BE604060	n	n	n	up	up	treated	283.204	570.776	266.03	296.581	1648.36	2415.24	34.682	277.643	31.2961	11.9249	141.343	199.391
Ta.12065.1.S1_at	Os07g30670.1	electron carrier/ electron transporter/ iron ion binding protein, putative, expressed	2Fe-2S iron-sulfur cluster protein-like [Oryza sativa (japonica cultivar-group)]	TA82022_4565	n	n	down	down	down	untreated	3063.83	898.089	2835.82	4856.63	2075.33	2001.45	514.689	150.401	225.827	1216.35	162.98	800.499
Ta.12065.1.S1_at	Os07g30670.1	electron carrier/ electron transporter/ iron ion binding protein, putative, expressed	2Fe-2S iron-sulfur cluster protein-like [Oryza sativa (japonica cultivar-group)]	TA82022_4565	n	n	down	down	down	treated	3423.7	971.132	1694.61	2041.65	74.1546	176.422	571.688	859.052	780.501	357.95	11.7558	62.0618
Ta.1207.1.S1_at	Os06g11290.1	12-oxophytodienoate reductase 2, putative, expressed	12-oxophytodienoic acid reductase [Oryza sativa (Rice)]	TA74359_4565	n	n	n	up	n	untreated	496.36	1121.37	168.754	124.308	90.1737	155.82	239.736	607.682	9.92126	31.7461	6.30958	67.8334
Ta.1207.1.S1_at	Os06g11290.1	12-oxophytodienoate reductase 2, putative, expressed	12-oxophytodienoic acid reductase [Oryza sativa (Rice)]	TA74359_4565	n	n	n	up	n	treated	443.476	1821.95	255.342	207.843	773.322	266.926	184.033	1360.8	23.1443	53.8568	42.5947	17.4157
Ta.1207.1.S1_s_at	Os06g11290.1	12-oxophytodienoate reductase 2, putative, expressed	12-oxophytodienoic acid reductase [Oryza sativa (Rice)]	TA74359_4565	n	n	n	up	n	untreated	1248.98	2780.07	280.414	204.302	194.457	498.506	627.912	1194.2	24.3296	72.0197	16.3703	337.794
Ta.1207.1.S1_s_at	Os06g11290.1	12-oxophytodienoate reductase 2, putative, expressed	12-oxophytodienoic acid reductase [Oryza sativa (Rice)]	TA74359_4565	n	n	n	up	n	treated	1201.68	4318.71	557.621	425.928	2413.3	831.524	527.616	3340.64	73.8759	92.4806	48.9603	184.289
Ta.1207.1.S1_x_at	Os06g11290.1	12-oxophytodienoate reductase 2, putative, expressed	12-oxophytodienoic acid reductase [Oryza sativa (Rice)]	TA74359_4565	n	n	n	up	n	untreated	581.031	1720.88	187.438	136.967	95.5927	173.029	276.882	868.942	12.143	45.6134	4.16965	96.148
Ta.1207.1.S1_x_at	Os06g11290.1	12-oxophytodienoate reductase 2, putative, expressed	12-oxophytodienoic acid reductase [Oryza sativa (Rice)]	TA74359_4565	n	n	n	up	n	treated	562.34	2287.19	274.097	242.184	1002.16	316.298	262.027	1741.36	22.0979	61.8667	18.2233	59.8262
Ta.12070.1.A1_at	Os11g44430.1	protein kinase domain containing protein, expressed	Serine/threonine protein kinase [Oryza sativa (japonica cultivar-group)]	TA83681_4565	n	up	up	up	up	treated	213.557	178.388	228.096	261.461	422.777	287.264	25.473	100.135	46.6808	47.7015	20.3162	35.6446
Ta.12070.1.A1_at	Os11g44430.1	protein kinase domain containing protein, expressed	Serine/threonine protein kinase [Oryza sativa (japonica cultivar-group)]	TA83681_4565	n	up	up	up	up	untreated	220.981	81.8281	103.371	82.5247	72.7605	99.9553	43.9944	1.66891	11.3134	13.4895	14.5956	33.0988
Ta.12072.1.A1_at	Os02g27060.1	HMG box family protein, expressed	Glutathione S-transferase GST16-like protein [Oryza sativa (japonica cultivar-group)]	TA105718_4565	n	n	down	down	n	untreated	235.488	136.978	148.072	220.957	223.689	218.473	27.8355	9.45644	12.3914	66.2625	28.6816	63.5255
Ta.12072.1.A1_at	Os02g27060.1	HMG box family protein, expressed	Glutathione S-transferase GST16-like protein [Oryza sativa (japonica cultivar-group)]	TA105718_4565	n	n	down	down	n	treated	217.008	111.274	71.9458	80.2509	48.1179	117.196	19.5044	31.0214	10.1631	11.0579	5.85377	16.6842
Ta.12083.1.A1_at	Os03g40020.1	rf1 protein, mitochondrial precursor, putative, expressed	Putative pentatricopeptide repeat protein [Oryza sativa (japonica cultivar-group)]	TA91112_4565	n	n	n	down	n	untreated	186.16	67.043	110.224	231.057	189.96	454.943	48.8183	28.8598	38.8796	120.923	41.1008	271.103
Ta.12083.1.A1_at	Os03g40020.1	rf1 protein, mitochondrial precursor, putative, expressed	Putative pentatricopeptide repeat protein [Oryza sativa (japonica cultivar-group)]	TA91112_4565	n	n	n	down	n	treated	153.118	52.1519	88.8792	102.891	24.6312	50.0515	5.93275	27.2977	28.9171	30.3358	1.98763	12.2827
Ta.12104.1.S1_at	Os02g35630.1	CLPX, putative, expressed	NA	CJ607324	n	n	n	down	n	untreated	361.293	362.61	485.476	422.652	399.312	480.544	10.016	58.0178	30.3364	35.7031	22.677	72.7761
Ta.12104.1.S1_at	Os02g35630.1	CLPX, putative, expressed	NA	CJ607324	n	n	n	down	n	treated	368.787	293.621	420.509	257.049	133.73	329.825	6.40108	58.3599	68.094	22.819	4.30983	21.2888
Ta.12104.2.S1_a_at	Os02g35630.1	CLPX, putative, expressed	Putative ATP-dependent Clp protease ATP-binding subunit ClpX1 [Oryza sativa (japonica cultivar-group)]	CA633742	n	n	n	down	n	untreated	1752.4	1841.97	2493.72	2368.97	2211.29	2657.47	37.8033	316.269	92.4441	389.529	93.9018	383.076
Ta.12104.2.S1_a_at	Os02g35630.1	CLPX, putative, expressed	Putative ATP-dependent Clp protease ATP-binding subunit ClpX1 [Oryza sativa (japonica cultivar-group)]	CA633742	n	n	n	down	n	treated	1781.56	1327.06	2524.72	1261.94	609.243	1375.55	76.6968	154.336	722.905	172.403	56.5653	210.904
Ta.12106.1.S1_at	Os09g38060.1	nicotinate-nucleotide pyrophosphorylase, putative, expressed	NADC homolog [Arabidopsis thaliana (Mouse-ear cress)]	TA85319_4565	n	n	n	down	n	untreated	246.905	165.624	220.208	198.724	209.47	210.634	17.9247	30.3775	9.32796	7.55788	18.8827	15.7674
Ta.12106.1.S1_at	Os09g38060.1	nicotinate-nucleotide pyrophosphorylase, putative, expressed	NADC homolog [Arabidopsis thaliana (Mouse-ear cress)]	TA85319_4565	n	n	n	down	n	treated	269.019	147.967	184.713	142.667	104.536	137.343	6.12672	35.1781	10.9088	22.4207	14.5283	24.6251
Ta.12112.1.A1_at	Os04g43030.1	triacylglycerol lipase, putative, expressed	OSJNBb0065L13.3 protein [Oryza sativa (japonica cultivar-group)]	TA89574_4565	n	n	n	down	n	untreated	471.454	304.414	252.491	283.468	470.566	408.999	48.2249	45.981	40.4479	80.2878	58.7324	170.817
Ta.12112.1.A1_at	Os04g43030.1	triacylglycerol lipase, putative, expressed	OSJNBb0065L13.3 protein [Oryza sativa (japonica cultivar-group)]	TA89574_4565	n	n	n	down	n	treated	485.73	199.719	166.023	137.145	47.7475	118.784	42.5693	78.1451	9.55421	2.85537	4.8123	3.05542
Ta.12113.1.S1_at	Os02g09200.1	cytochrome P450 71D10, putative, expressed	Putative cytochrome P450 [Oryza sativa (japonica cultivar-group)]	BQ171624	n	n	down	n	n	untreated	57.6906	84.2495	514.657	226.095	61.068	51.6582	9.07207	8.43914	27.281	39.3871	10.0151	8.99107
Ta.12113.1.S1_at	Os02g09200.1	cytochrome P450 71D10, putative, expressed	Putative cytochrome P450 [Oryza sativa (japonica cultivar-group)]	BQ171624	n	n	down	n	n	treated	75.8784	66.7854	205.504	87.0276	36.8782	47.691	14.117	8.15884	31.865	19.6572	12.8541	9.19739
Ta.12114.1.A1_a_at	Os12g39360.1	aspartic proteinase nepenthesin-1 precursor, putative, expressed	Eukaryotic aspartyl protease [Oryza sativa (japonica cultivar-group)]	BQ171626	n	n	n	down	n	untreated	1357.27	1215.47	1197.43	2603.29	1440.08	1143.59	70.1598	363.701	217.687	162.8	178.505	85.3685
Ta.12114.1.A1_a_at	Os12g39360.1	aspartic proteinase nepenthesin-1 precursor, putative, expressed	Eukaryotic aspartyl protease [Oryza sativa (japonica cultivar-group)]	BQ171626	n	n	n	down	n	treated	1372.56	1078.12	1182.33	2077.67	333.09	854.677	49.9517	703.708	157.47	252.67	44.101	162.368
Ta.12114.1.A1_at	Os12g39360.1	aspartic proteinase nepenthesin-1 precursor, putative, expressed	NA	CA622920	n	n	n	down	n	untreated	620.119	507.098	450.968	945.532	577.395	489.493	24.9428	136.976	84.6071	84.0496	66.1369	43.2869
Ta.12114.1.A1_at	Os12g39360.1	aspartic proteinase nepenthesin-1 precursor, putative, expressed	NA	CA622920	n	n	n	down	n	treated	585.46	438.116	411.595	666.268	135.115	339.494	44.7512	192.789	87.1303	76.0992	26.682	60.7185
Ta.12114.2.A1_at	Os12g39360.1	aspartic proteinase nepenthesin-1 precursor, putative, expressed	Eukaryotic aspartyl protease [Oryza sativa (japonica cultivar-group)]	BG906052	n	n	n	down	n	untreated	658.98	595.297	351.421	484.602	588.649	431.111	40.3613	108.975	55.8121	85.8495	112.862	107.287
Ta.12114.2.A1_at	Os12g39360.1	aspartic proteinase nepenthesin-1 precursor, putative, expressed	Eukaryotic aspartyl protease [Oryza sativa (japonica cultivar-group)]	BG906052	n	n	n	down	n	treated	636.829	407.845	349.961	487.512	84.0969	346.957	41.8792	70.8256	38.1232	37.8786	11.2452	49.92
Ta.12117.1.A1_at	Os02g48080.1	serine/threonine-protein kinase receptor precursor, putative, expressed	Receptor protein kinase-like [Oryza sativa (japonica cultivar-group)]	TA105313_4565	n	n	n	up	up	untreated	29.8469	38.1442	50.453	59.3313	33.5844	25.3956	0.939784	3.39206	8.02221	9.5137	3.09453	2.48482
Ta.12117.1.A1_at	Os02g48080.1	serine/threonine-protein kinase receptor precursor, putative, expressed	Receptor protein kinase-like [Oryza sativa (japonica cultivar-group)]	TA105313_4565	n	n	n	up	up	treated	30.4283	77.9291	95.6568	111.052	108.369	74.1947	5.20788	41.7351	3.82861	11.0041	9.86137	9.8718
Ta.12118.1.S1_a_at	Os05g30390.1	glycosyl hydrolase family 1 protein	putative beta-glucosidase [Oryza sativa (japonica cultivar-group)]	TA66800_4565	n	n	down	down	down	untreated	9629.2	9049.17	18263.7	15029.6	6617.54	8732.65	1007.25	3970.09	273.24	1434.09	2011.76	1910.49
Ta.12118.1.S1_a_at	Os05g30390.1	glycosyl hydrolase family 1 protein	putative beta-glucosidase [Oryza sativa (japonica cultivar-group)]	TA66800_4565	n	n	down	down	down	treated	10645.3	7261.99	13055.4	5827.03	85.2918	148.357	1557.76	1188.89	1414.86	558.122	21.2621	96.5721
Ta.12119.1.S1_x_at	Os04g34610.1	expressed protein	NA	TA69511_4565	n	n	down	down	down	untreated	3203.61	4128.36	10585.3	9545.07	5950.33	4759.8	923.324	73.9226	2217.36	1571.7	38.6281	868.537
Ta.12119.1.S1_x_at	Os04g34610.1	expressed protein	NA	TA69511_4565	n	n	down	down	down	treated	3154.22	2925.15	7337.97	3465.56	107.012	33.0019	681.983	540.741	1567.67	635.571	56.5935	1.68692
Ta.12119.3.S1_at	Os04g34610.1	expressed protein	NA	BQ171632	n	n	down	down	down	untreated	142.466	215.912	508.529	555.167	232.364	203.951	26.8683	7.39157	131.428	208.711	17.4121	19.6517
Ta.12119.3.S1_at	Os04g34610.1	expressed protein	NA	BQ171632	n	n	down	down	down	treated	124.515	138.955	306.318	151.588	41.8509	20.6324	19.3988	6.75645	92.0206	23.5516	26.3533	3.9715
Ta.12123.2.S1_x_at	Os08g39070.1	COP9 signalosome complex subunit 6a, putative, expressed	COP9 signalosome subunit 6 [Oryza sativa (Rice)]	TA75729_4565	n	n	n	up	n	untreated	221.793	461.887	315.588	416.701	256.912	271.895	19.6654	47.3389	19.8698	71.7087	15.7987	67.2042
Ta.12123.2.S1_x_at	Os08g39070.1	COP9 signalosome complex subunit 6a, putative, expressed	COP9 signalosome subunit 6 [Oryza sativa (Rice)]	TA75729_4565	n	n	n	up	n	treated	221.103	493.417	468.94	515.904	515.971	549.955	20.4496	32.5538	64.8838	42.3533	16.9269	17.511
Ta.12127.1.A1_at	Os02g40240.1	leucine-rich repeat receptor protein kinase EXS precursor, putative, expressed	Hypothetical protein P0407A09.33 [Oryza sativa (japonica cultivar-group)]	BQ171646	n	up	up	n	down	untreated	935.058	590.362	1051.39	950.06	595.557	914.245	495.065	119.192	182.987	147.273	185.025	571.41
Ta.12127.1.A1_at	Os02g40240.1	leucine-rich repeat receptor protein kinase EXS precursor, putative, expressed	Hypothetical protein P0407A09.33 [Oryza sativa (japonica cultivar-group)]	BQ171646	n	up	up	n	down	treated	897.443	1213.83	2578.96	2665.18	189.14	119.909	185.402	1391.01	371.092	229.383	53.8412	28.4273
Ta.12130.3.S1_at	Os04g40840.1	histone acetyltransferase ELP3, putative, expressed	Probable histone acetyltransferase ELP3 [Oryza sativa (Rice)]	BJ271271	n	n	n	down	n	untreated	30.2941	23.3238	23.5513	30.8745	25.8779	21.5339	6.66282	4.92777	5.42835	11.9043	3.40786	1.92379
Ta.12130.3.S1_at	Os04g40840.1	histone acetyltransferase ELP3, putative, expressed	Probable histone acetyltransferase ELP3 [Oryza sativa (Rice)]	BJ271271	n	n	n	down	n	treated	25.7237	18.9141	19.5481	19.8402	12.439	15.5488	2.20006	3.78412	1.97687	1.52063	2.91797	1.61899
Ta.12133.1.A1_at	Os03g42830.1	transparent testa 12 protein, putative, expressed	Putative multidrug efflux protein [Oryza sativa (Rice)]	TA108917_4565	n	n	n	down	down	untreated	2501.22	3598.44	580.666	68.0379	3066.81	3304.59	233.023	70.1266	187.586	1.84645	309.535	336.32
Ta.12133.1.A1_at	Os03g42830.1	transparent testa 12 protein, putative, expressed	Putative multidrug efflux protein [Oryza sativa (Rice)]	TA108917_4565	n	n	n	down	down	treated	2500.11	2185.58	385.262	69.5822	209.934	895.462	212.915	1842.35	37.0021	13.7397	50.2341	189.582
Ta.12135.1.A1_at	Os05g44300.1	plant-specific domain TIGR01615 family protein, expressed	Hypothetical protein P0481E12.8-1 [Oryza sativa (japonica cultivar-group)]	TA97234_4565	n	n	down	n	n	untreated	431.951	244.642	233.225	322.503	196.609	211.169	52.0604	62.9528	36.131	49.615	14.8122	59.3649
Ta.12135.1.A1_at	Os05g44300.1	plant-specific domain TIGR01615 family protein, expressed	Hypothetical protein P0481E12.8-1 [Oryza sativa (japonica cultivar-group)]	TA97234_4565	n	n	down	n	n	treated	396.828	186.661	172.686	143.805	118.903	187.007	60.203	40.202	24.1792	13.7299	14.4971	54.4213
Ta.12172.1.S1_at	Os03g62670.1	S-adenosylmethionine-dependent methyltransferase/ methyltransferase/ thiopurine S-methyltransferase, putative, expressed	Putative methyl chloride transferase [Oryza sativa (japonica cultivar-group)]	TA98399_4565	n	n	down	down	down	untreated	2895.31	725.318	557.263	250.094	1702.42	2892.56	1529.74	105.653	377.666	61.1344	1033.77	640.573
Ta.12172.1.S1_at	Os03g62670.1	S-adenosylmethionine-dependent methyltransferase/ methyltransferase/ thiopurine S-methyltransferase, putative, expressed	Putative methyl chloride transferase [Oryza sativa (japonica cultivar-group)]	TA98399_4565	n	n	down	down	down	treated	2449.62	600.568	311.437	61.1514	17.7026	67.22	1356.96	474.205	152.515	20.2706	4.26625	7.20154
Ta.12180.1.S1_at	Os03g51920.1	peptidase, M50 family, putative, expressed	Hypothetical protein OSJNBb0011H13.3 [Oryza sativa (japonica cultivar-group)]	TA87036_4565	n	n	n	down	n	untreated	69.5738	1495.09	152.276	146.828	263.473	503.461	19.1071	279.559	35.2428	45.1266	29.2024	525.54
Ta.12180.1.S1_at	Os03g51920.1	peptidase, M50 family, putative, expressed	Hypothetical protein OSJNBb0011H13.3 [Oryza sativa (japonica cultivar-group)]	TA87036_4565	n	n	n	down	n	treated	64.3438	1084.24	162.043	224.628	99.9648	325.496	26.2664	824.683	21.2064	24.1093	23.2633	114.899
Ta.12188.1.A1_at	Os10g41100.1	CCT motif family protein, expressed	CONSTANS-like protein CO9 [Hordeum vulgare var. distichum (Two-rowed barley)]	BQ171773	n	n	n	down	n	untreated	1078.53	1703.15	158.541	136.229	1746.64	1223.81	135.579	333.074	33.1821	42.1895	177.25	138.533
Ta.12188.1.A1_at	Os10g41100.1	CCT motif family protein, expressed	CONSTANS-like protein CO9 [Hordeum vulgare var. distichum (Two-rowed barley)]	BQ171773	n	n	n	down	n	treated	1072.48	1158.46	166.742	149.103	553.774	901.681	108.266	914.97	9.51242	43.9154	183.541	80.2228
Ta.12189.1.A1_at	Os06g47900.1	expressed protein	NA	BQ171777	n	n	n	down	n	untreated	172.605	200.154	146.842	119.585	224.924	218.326	24.7527	19.7406	5.70867	8.08518	14.0257	29.5656
Ta.12189.1.A1_at	Os06g47900.1	expressed protein	NA	BQ171777	n	n	n	down	n	treated	174.53	140.764	115.575	116.583	77.3371	129.836	13.1195	35.2881	5.94903	10.0548	5.43089	5.2341
Ta.12190.1.A1_at	Os07g28610.1	thylakoid membrane phosphoprotein 14 kda, chloroplast precursor, putative, expressed	Hypothetical protein OJ1115_C05.14 [Oryza sativa (japonica cultivar-group)]	TA76143_4565	n	n	n	down	down	untreated	5421.19	3340.63	3591	4928.13	3316.28	2828.97	550.182	339.933	278.608	860.62	187.951	830.356
Ta.12190.1.A1_at	Os07g28610.1	thylakoid membrane phosphoprotein 14 kda, chloroplast precursor, putative, expressed	Hypothetical protein OJ1115_C05.14 [Oryza sativa (japonica cultivar-group)]	TA76143_4565	n	n	n	down	down	treated	5975.06	2701.06	2735.46	2736.3	438.629	230.381	624.247	488.642	1071.64	683.917	179.876	36.4472
Ta.12196.1.A1_at	Os06g49930.1	F-box domain containing protein, expressed	Hypothetical protein [Sorghum bicolor (Sorghum) (Sorghum vulgare)]	TA108041_4565	n	n	n	down	down	untreated	69.7927	60.4124	137.129	118.281	77.7618	77.1454	7.5766	7.1481	3.7242	13.1206	7.60789	10.3124
Ta.12196.1.A1_at	Os06g49930.1	F-box domain containing protein, expressed	Hypothetical protein [Sorghum bicolor (Sorghum) (Sorghum vulgare)]	TA108041_4565	n	n	n	down	down	treated	61.7413	70.5135	91.8595	69.7658	27.0868	22.4163	10.0705	14.1684	18.1568	4.13988	3.97565	4.60123
Ta.122.1.S1_x_at	Os02g44870.1	dehydrin COR410, putative, expressed	Dehydrin 8 [Hordeum vulgare (Barley)]	TA64669_4565	n	n	n	down	n	untreated	11851.3	13651.9	5928.58	4799.89	14796.9	12051.3	942.255	307.885	891.545	301.194	333.479	730.785
Ta.122.1.S1_x_at	Os02g44870.1	dehydrin COR410, putative, expressed	Dehydrin 8 [Hordeum vulgare (Barley)]	TA64669_4565	n	n	n	down	n	treated	11768.7	10586.2	3913.01	2906.5	3910.55	9701.94	1275.35	6740.08	206.712	51.9852	631.26	405.614
Ta.12205.1.A1_at	Os12g31560.1	protein kinase domain containing protein	Transposon protein, putative, CACTA, En/Spm sub-class [Oryza sativa (japonica cultivar-group)]	TA95889_4565	n	n	n	n	up	untreated	816.255	356.566	209.663	386.784	502.466	417.337	81.9099	34.0758	54.7472	74.6621	43.3478	54.826
Ta.12205.1.A1_at	Os12g31560.1	protein kinase domain containing protein	Transposon protein, putative, CACTA, En/Spm sub-class [Oryza sativa (japonica cultivar-group)]	TA95889_4565	n	n	n	n	up	treated	851.528	392.899	313.348	620.068	790.814	1090.99	95.5192	185.218	48.115	73.1237	35.3422	212.092
Ta.12206.1.S1_at	Os02g02520.1	expressed protein	Hypothetical protein OJ1442_E05.24 [Oryza sativa (japonica cultivar-group)]	CV766897	n	n	n	down	down	untreated	2958.05	2032.7	1912.47	2060.09	2136.57	2218.29	216.146	183.887	205.162	375.947	151.514	647.967
Ta.12206.1.S1_at	Os02g02520.1	expressed protein	Hypothetical protein OJ1442_E05.24 [Oryza sativa (japonica cultivar-group)]	CV766897	n	n	n	down	down	treated	3047.1	1472.24	1444.44	1208.28	219.817	548.487	295.745	345.363	388.961	118.022	49.8016	90.7066
Ta.12206.2.S1_a_at	Os02g02520.1	expressed protein	Hypothetical protein OJ1442_E05.24 [Oryza sativa (japonica cultivar-group)]	TA77898_4565	n	n	n	down	n	untreated	1860.4	1366.58	1412.93	1578.94	1425.41	1457.01	195.975	34.4616	148.639	158.363	34.7865	460.047
Ta.12206.2.S1_a_at	Os02g02520.1	expressed protein	Hypothetical protein OJ1442_E05.24 [Oryza sativa (japonica cultivar-group)]	TA77898_4565	n	n	n	down	n	treated	1942.71	995.161	1350.15	873.34	191.596	383.44	190.363	220.439	503.972	111.914	58.4342	41.267
Ta.12206.2.S1_at	Os02g02520.1	expressed protein	Hypothetical protein OJ1442_E05.24 [Oryza sativa (japonica cultivar-group)]	TA77898_4565	n	n	n	down	n	untreated	1089.32	768.947	758.782	918.473	796.054	826.318	138.592	80.3386	47.6089	91.1637	28.4846	261.841
Ta.12206.2.S1_at	Os02g02520.1	expressed protein	Hypothetical protein OJ1442_E05.24 [Oryza sativa (japonica cultivar-group)]	TA77898_4565	n	n	n	down	n	treated	1119.95	579.062	804.701	501.438	113.92	231.924	125.461	150.894	356.421	66.7954	29.5052	40.2464
Ta.12214.1.A1_at	Os07g42970.1	cytokinin-O-glucosyltransferase 2, putative	NA	BQ171830	n	n	n	up	n	untreated	27.1962	24.7959	22.871	19.5452	25.1898	32.3144	2.26096	2.62607	2.97331	2.55882	3.08239	7.95549
Ta.12214.1.A1_at	Os07g42970.1	cytokinin-O-glucosyltransferase 2, putative	NA	BQ171830	n	n	n	up	n	treated	28.3623	29.2848	19.8067	23.2786	171.524	82.7425	7.31121	5.62597	4.57167	2.54305	29.8861	16.62
Ta.12218.1.A1_at	Os01g68450.1	expressed protein	P0470A12.24 [Oryza sativa (japonica cultivar-group)]	TA101482_4565	n	n	n	down	down	untreated	2820.99	2062.02	1944.27	1695.19	2233.61	2112.73	345.241	137.32	177.775	472.808	98.1994	774.874
Ta.12218.1.A1_at	Os01g68450.1	expressed protein	P0470A12.24 [Oryza sativa (japonica cultivar-group)]	TA101482_4565	n	n	n	down	down	treated	2980.73	1266.41	1297.16	905.198	119.229	264.274	299.056	359.813	365.434	105.558	57.4624	30.4548
Ta.12219.1.A1_at	Os05g43230.1	cysteine proteinase RD21a precursor, putative, expressed	Hypothetical protein OSJNBb0108E17.2 [Oryza sativa (japonica cultivar-group)]	TA78845_4565	n	n	n	n	up	untreated	233.196	356.397	362.103	357.603	338.722	260.406	15.8663	36.9894	69.7532	10.9978	21.7187	11.295
Ta.12219.1.A1_at	Os05g43230.1	cysteine proteinase RD21a precursor, putative, expressed	Hypothetical protein OSJNBb0108E17.2 [Oryza sativa (japonica cultivar-group)]	TA78845_4565	n	n	n	n	up	treated	212.977	384.87	344.968	352.783	356.516	555.802	14.836	23.0856	16.9959	39.3334	48.5059	46.9066
Ta.12225.1.S1_x_at	Os06g39240.1	endothelial differentiation-related factor 1, putative, expressed	Putative ethylene-responsive transcriptional coactivator [Oryza sativa (japonica cultivar-group)]	TA82925_4565	n	n	n	up	n	untreated	96.9125	280.358	92.4403	94.9012	130.177	182.779	5.87122	145.391	10.6283	6.57492	9.4422	54.1996
Ta.12225.1.S1_x_at	Os06g39240.1	endothelial differentiation-related factor 1, putative, expressed	Putative ethylene-responsive transcriptional coactivator [Oryza sativa (japonica cultivar-group)]	TA82925_4565	n	n	n	up	n	treated	94.044	332.43	110.416	145.175	642.904	176.196	6.14533	154.216	12.795	23.3617	211.184	35.6672
Ta.12225.2.S1_at	Os06g39240.1	endothelial differentiation-related factor 1, putative, expressed	Putative ethylene-responsive transcriptional coactivator [Oryza sativa (japonica cultivar-group)]	BQ171893	n	n	up	up	n	untreated	70.6828	714.525	64.1773	64.9694	154.148	361.347	13.7937	437.815	7.69279	12.7021	35.0174	307.084
Ta.12225.2.S1_at	Os06g39240.1	endothelial differentiation-related factor 1, putative, expressed	Putative ethylene-responsive transcriptional coactivator [Oryza sativa (japonica cultivar-group)]	BQ171893	n	n	up	up	n	treated	54.8656	941.108	106.92	253.835	1109.01	165.52	12.5272	572.988	20.9841	47.4542	346.971	18.5312
Ta.12225.3.S1_a_at	Os06g39240.1	endothelial differentiation-related factor 1, putative, expressed	Putative ethylene-responsive transcriptional coactivator [Oryza sativa (japonica cultivar-group)]	TA82925_4565	n	n	n	up	n	untreated	253.428	461.878	251.697	238.286	291.536	371.016	51.8961	160.638	38.6483	20.2041	23.176	15.5362
Ta.12225.3.S1_a_at	Os06g39240.1	endothelial differentiation-related factor 1, putative, expressed	Putative ethylene-responsive transcriptional coactivator [Oryza sativa (japonica cultivar-group)]	TA82925_4565	n	n	n	up	n	treated	277.375	498.383	235.773	269.548	888.983	347.736	26.7467	179.285	31.4949	24.345	207.453	32.6236
Ta.12231.1.A1_at	Os02g22090.1	pattern formation protein EMB30, putative, expressed	Putative pattern formation protein GNOM [Oryza sativa (japonica cultivar-group)]	BQ171904	n	n	up	up	up	untreated	78.5744	96.7013	76.0367	77.3783	74.6762	50.4584	13.3656	30.7311	13.6499	4.64137	7.45979	11.4286
Ta.12231.1.A1_at	Os02g22090.1	pattern formation protein EMB30, putative, expressed	Putative pattern formation protein GNOM [Oryza sativa (japonica cultivar-group)]	BQ171904	n	n	up	up	up	treated	75.2489	190.561	151.478	224.323	601.287	210.527	16.1536	57.1485	14.645	12.8388	45.0078	52.1549
Ta.12247.1.S1_at	Os07g09970.1	lipid binding protein, putative, expressed	Lipid transfer protein-like [Oryza sativa (japonica cultivar-group)]	CA653096	n	n	n	up	up	untreated	84.266	91.0706	91.6488	88.2218	91.8052	74.7993	5.33888	9.56405	6.95411	17.0921	8.93521	17.8241
Ta.12247.1.S1_at	Os07g09970.1	lipid binding protein, putative, expressed	Lipid transfer protein-like [Oryza sativa (japonica cultivar-group)]	CA653096	n	n	n	up	up	treated	90.7743	111.925	95.9312	160.928	323.63	235.43	18.5694	48.4962	14.1987	44.2548	51.033	31.2379
Ta.12250.1.A1_at	Os03g07170.1	expressed protein	Putative sugar transport protein [Oryza sativa (japonica cultivar-group)]	BQ171945	n	n	n	up	n	untreated	219.666	132.998	149.785	133.631	130.057	137.043	24.3168	24.6046	28.2435	1.07338	15.1522	24.2121
Ta.12250.1.A1_at	Os03g07170.1	expressed protein	Putative sugar transport protein [Oryza sativa (japonica cultivar-group)]	BQ171945	n	n	n	up	n	treated	222.804	134.896	119.459	127.658	335.363	158.515	27.4354	20.7032	16.7897	11.3145	70.0048	46.0352
Ta.12251.1.S1_x_at	Os06g09330.1	ubiquitin-conjugating enzyme E2 J2, putative, expressed	NA	TA58744_4565	n	n	n	up	n	untreated	3467.45	2812.2	2802.34	2139.75	2736.08	2563.84	211.817	256.131	182.382	179.613	293.267	456.362
Ta.12251.1.S1_x_at	Os06g09330.1	ubiquitin-conjugating enzyme E2 J2, putative, expressed	NA	TA58744_4565	n	n	n	up	n	treated	3488.9	3234.51	2444.62	3269.12	6897.5	4405.68	246.098	182.294	435.184	70.6422	379.043	152.723
Ta.12251.2.S1_a_at	Os06g09330.1	ubiquitin-conjugating enzyme E2 J2, putative, expressed	Ubiqutin conjugating enzyme 2 [Zea mays (Maize)]	CD905808	n	n	n	up	n	untreated	1094.1	941.083	843.578	776.632	918.637	879.231	172.271	112.407	88.5447	182.874	76.7819	196.316
Ta.12251.2.S1_a_at	Os06g09330.1	ubiquitin-conjugating enzyme E2 J2, putative, expressed	Ubiqutin conjugating enzyme 2 [Zea mays (Maize)]	CD905808	n	n	n	up	n	treated	1045.84	915.447	984.14	1069.8	2119.29	1406.45	206.566	82.3028	117.134	251.768	197.783	344.212
Ta.12251.3.S1_x_at	Os06g09330.1	ubiquitin-conjugating enzyme E2 J2, putative, expressed	NA	TA58744_4565	n	n	n	up	n	untreated	3826.04	3077.47	3073.93	2395.31	3263.77	2901.68	282.329	388.231	195.516	166.659	266.167	566.835
Ta.12251.3.S1_x_at	Os06g09330.1	ubiquitin-conjugating enzyme E2 J2, putative, expressed	NA	TA58744_4565	n	n	n	up	n	treated	3941.13	3454.2	2664.19	3338.78	6955.13	4999.09	408.266	254.666	334.622	345.116	416.644	256.494
Ta.12252.1.S1_s_at	Os01g21160.1	dihydrolipoyllysine-residue acetyltransferase component of pyruvatedehydrogenase complex, putative, expressed	Putative dihydrolipoylacyltransferase subunit of the branched-chain alpha-keto acid dehydrogenase complex [Oryza sativa (japonica cultivar-group)]	TA77363_4565	n	n	down	n	n	untreated	497.795	238.474	986.853	674.592	505.588	234.938	126.242	153.111	492.784	126.428	180.482	101.588
Ta.12252.1.S1_s_at	Os01g21160.1	dihydrolipoyllysine-residue acetyltransferase component of pyruvatedehydrogenase complex, putative, expressed	Putative dihydrolipoylacyltransferase subunit of the branched-chain alpha-keto acid dehydrogenase complex [Oryza sativa (japonica cultivar-group)]	TA77363_4565	n	n	down	n	n	treated	380.995	355.031	419.363	246.906	392.619	605.534	55.9721	75.844	177.55	60.2654	228.323	112.508
Ta.12265.2.S1_at	Os06g41440.1	expressed protein	Hypothetical protein At1g50120 [Arabidopsis thaliana (Mouse-ear cress)]	TA84938_4565	n	n	n	up	n	untreated	170.043	422.917	196.562	189.886	170.347	168.18	15.5334	73.5707	13.635	9.08776	18.3179	24.2555
Ta.12265.2.S1_at	Os06g41440.1	expressed protein	Hypothetical protein At1g50120 [Arabidopsis thaliana (Mouse-ear cress)]	TA84938_4565	n	n	n	up	n	treated	145.51	406.54	198.146	247.876	432.546	292.377	11.5296	130.816	34.5494	12.9697	15.0794	25.2631
Ta.12282.1.A1_at	Os01g66300.1	nucleic acid binding protein, putative, expressed	Hypothetical protein P0426G01.11 [Oryza sativa (japonica cultivar-group)]	TA85688_4565	n	n	n	down	n	untreated	302.342	555.723	639.282	544.49	419.699	336.525	13.2274	82.3326	113.725	43.4136	46.6254	21.4779
Ta.12282.1.A1_at	Os01g66300.1	nucleic acid binding protein, putative, expressed	Hypothetical protein P0426G01.11 [Oryza sativa (japonica cultivar-group)]	TA85688_4565	n	n	n	down	n	treated	258.117	481.167	565.209	400.417	146.111	268.229	5.50613	97.7471	59.5144	17.9668	6.14955	9.48228
Ta.12283.1.A1_at	Os04g49580.1	nucleolar complex protein 4, putative, expressed	OSJNBa0013K16.9 protein [Oryza sativa (japonica cultivar-group)]	TA80990_4565	n	n	n	down	n	untreated	212.051	179.971	293.785	445.9	278.305	277.455	20.3645	28.7609	25.5639	18.8413	42.3811	12.8697
Ta.12283.1.A1_at	Os04g49580.1	nucleolar complex protein 4, putative, expressed	OSJNBa0013K16.9 protein [Oryza sativa (japonica cultivar-group)]	TA80990_4565	n	n	n	down	n	treated	201.893	214.251	285.468	396.247	111.866	279.331	38.1511	136.947	20.5035	16.3213	6.14337	69.7457
Ta.12284.1.A1_at	Os06g45980.1	nucleic acid binding protein, putative, expressed	Hypothetical protein [Arabidopsis thaliana (Mouse-ear cress)]	TA81660_4565	n	n	n	down	n	untreated	235.5	115.102	130.393	309.722	194.756	257.856	23.5989	25.624	46.0545	74.6758	29.0477	68.3002
Ta.12284.1.A1_at	Os06g45980.1	nucleic acid binding protein, putative, expressed	Hypothetical protein [Arabidopsis thaliana (Mouse-ear cress)]	TA81660_4565	n	n	n	down	n	treated	236.024	114.54	155.269	217.167	54.7174	194.055	23.9508	70.2506	42.7226	40.8424	4.86196	29.6357
Ta.1229.1.S1_x_at	Os04g43650.1	L-allo-threonine aldolase, putative, expressed	OSJNBa0073E02.3 protein [Oryza sativa (Rice)]	TA69136_4565	n	n	n	up	up	untreated	240.81	640.189	91.8601	93.0915	163.867	134.324	91.9745	116.484	6.00288	9.55551	17.0692	35.4095
Ta.1229.1.S1_x_at	Os04g43650.1	L-allo-threonine aldolase, putative, expressed	OSJNBa0073E02.3 protein [Oryza sativa (Rice)]	TA69136_4565	n	n	n	up	up	treated	194.159	700.932	121.44	109.257	1051.47	320.15	50.8437	550.878	20.3263	4.22619	571.192	24.3483
Ta.12290.1.A1_at	Os01g51040.1	expressed protein	P0692C11.17 [Oryza sativa (japonica cultivar-group)]	TA93272_4565	n	n	n	down	n	untreated	85.2417	50.8489	43.9143	64.1519	83.5767	56.0619	4.33407	3.85649	0.0786556	15.8727	9.65238	12.7314
Ta.12290.1.A1_at	Os01g51040.1	expressed protein	P0692C11.17 [Oryza sativa (japonica cultivar-group)]	TA93272_4565	n	n	n	down	n	treated	83.6006	36.2575	38.0629	37.224	23.0039	24.8291	3.53742	7.45427	3.19917	4.84239	6.18736	3.81984
Ta.12303.1.S1_at	Os04g40490.1	hydrolase, hydrolyzing O-glycosyl compounds, putative, expressed	H0510A06.1 protein [Oryza sativa (Rice)]	TA81808_4565	n	n	n	n	up	untreated	128.445	151.216	258.465	284.32	181.246	134.801	10.8176	21.3272	9.22678	44.2697	22.0216	29.312
Ta.12303.1.S1_at	Os04g40490.1	hydrolase, hydrolyzing O-glycosyl compounds, putative, expressed	H0510A06.1 protein [Oryza sativa (Rice)]	TA81808_4565	n	n	n	n	up	treated	113.359	178.559	204.251	175.281	122.995	464.587	10.9276	10.8453	20.4733	13.7924	3.13052	97.5135
Ta.12326.1.S1_at	Os02g43340.1	embryogenesis-associated protein EMB8, putative, expressed	Putative late embryonic abundant protein EMB8 [Oryza sativa (japonica cultivar-group)]	TA83553_4565	n	n	n	down	n	untreated	123.242	255.588	168.933	98.6008	217.039	261.702	20.1303	65.9841	36.9199	28.1975	39.795	118.062
Ta.12326.1.S1_at	Os02g43340.1	embryogenesis-associated protein EMB8, putative, expressed	Putative late embryonic abundant protein EMB8 [Oryza sativa (japonica cultivar-group)]	TA83553_4565	n	n	n	down	n	treated	120.929	146.229	154.314	70.3787	38.1223	114.525	21.1589	80.8279	43.243	15.7203	10.0521	24.8301
Ta.1233.1.S1_at	Os02g05680.1	disulfide oxidoreductase/ electron carrier/ oxidoreductase, putative, expressed	Hypothetical protein At5g22140/T6G21_250 [Arabidopsis thaliana (Mouse-ear cress)]	TA61314_4565	n	n	n	up	up	untreated	399.289	145.976	312.532	278.428	197.031	176.258	60.6256	27.9873	20.1279	18.3314	24.5158	17.0368
Ta.1233.1.S1_at	Os02g05680.1	disulfide oxidoreductase/ electron carrier/ oxidoreductase, putative, expressed	Hypothetical protein At5g22140/T6G21_250 [Arabidopsis thaliana (Mouse-ear cress)]	TA61314_4565	n	n	n	up	up	treated	371.92	196.179	226.2	225.457	565.754	744.672	63.944	63.3608	34.3486	37.6641	56.1141	111.384
Ta.12337.1.S1_at	Os03g44150.1	ornithine aminotransferase, putative, expressed	Ornithine--oxo-acid aminotransferase, putative [Oryza sativa (japonica cultivar-group)]	CA638052	n	n	n	n	up	untreated	346.828	364.231	742.352	356.03	447.821	260.768	79.6166	162.129	414.371	90.3271	77.1838	90.3311
Ta.12337.1.S1_at	Os03g44150.1	ornithine aminotransferase, putative, expressed	Ornithine--oxo-acid aminotransferase, putative [Oryza sativa (japonica cultivar-group)]	CA638052	n	n	n	n	up	treated	345.194	550.105	538.748	267.331	924.46	1138.84	74.5986	225.48	221.073	55.7657	300.591	171.917
Ta.12338.1.S1_at	Os06g20340.1	IBR5, putative, expressed	Protein phosphatase-like [Oryza sativa (japonica cultivar-group)]	TA81088_4565	n	n	n	up	up	untreated	574.162	709.433	1049.48	674.946	480.826	462.097	32.9033	65.3009	122.79	69.3299	36.3634	83.605
Ta.12338.1.S1_at	Os06g20340.1	IBR5, putative, expressed	Protein phosphatase-like [Oryza sativa (japonica cultivar-group)]	TA81088_4565	n	n	n	up	up	treated	536.757	861.449	937.279	726.526	1003.09	922.648	32.9782	133.334	205.645	3.18691	94.6769	26.7285
Ta.12338.2.S1_a_at	Os06g20340.1	IBR5, putative, expressed	Protein phosphatase-like [Oryza sativa (japonica cultivar-group)]	CK161391	n	n	n	up	n	untreated	260.039	332.126	485.845	338.026	213.188	207.952	32.1081	25.3833	44.0925	39.5339	15.5464	47.9357
Ta.12338.2.S1_a_at	Os06g20340.1	IBR5, putative, expressed	Protein phosphatase-like [Oryza sativa (japonica cultivar-group)]	CK161391	n	n	n	up	n	treated	248.812	413.974	498.704	345.778	475.889	404.831	15.6149	60.7242	30.3337	13.4458	51.9773	16.6543
Ta.12339.1.S1_at	Os08g03350.1	LHT1, putative, expressed	Putative histidine amino acid transporter [Oryza sativa (japonica cultivar-group)]	TA54349_4565	n	up	up	up	n	untreated	2846.61	8551	5080.1	3934.59	2119.46	2362.41	106.33	491.201	661.99	153.647	478.315	2280.76
Ta.12339.1.S1_at	Os08g03350.1	LHT1, putative, expressed	Putative histidine amino acid transporter [Oryza sativa (japonica cultivar-group)]	TA54349_4565	n	up	up	up	n	treated	2660.31	10914.8	10449	10663.7	19975.3	24226.5	174.219	1685.21	597.013	1415.62	510.481	435.579
Ta.12339.1.S1_s_at	Os08g03350.1	LHT1, putative, expressed	Putative histidine amino acid transporter [Oryza sativa (japonica cultivar-group)]	TA54349_4565	n	up	up	up	n	untreated	3431.91	7765.65	4470.52	2855.55	1739.34	2407	575.781	487.547	637.015	98.3675	345.061	2531.29
Ta.12339.1.S1_s_at	Os08g03350.1	LHT1, putative, expressed	Putative histidine amino acid transporter [Oryza sativa (japonica cultivar-group)]	TA54349_4565	n	up	up	up	n	treated	3375.68	9743.64	9897.81	9882.39	17033.7	20485.8	186.828	1576.05	785.353	919.486	727.165	1127.79
Ta.12341.1.S1_at	Os08g44400.1	glutathione S-transferase, N-terminal domain containing protein, expressed	Putative auxin-regulated protein [Oryza sativa (japonica cultivar-group)]	TA74195_4565	n	n	n	down	down	untreated	1194.2	910.003	1121.52	1607.31	929.008	857.446	144.701	33.7083	34.4782	187.881	163.926	360.393
Ta.12341.1.S1_at	Os08g44400.1	glutathione S-transferase, N-terminal domain containing protein, expressed	Putative auxin-regulated protein [Oryza sativa (japonica cultivar-group)]	TA74195_4565	n	n	n	down	down	treated	1327.72	710.146	823.509	838.914	152.72	135.907	258.403	55.6283	259.878	225.199	56.5576	36.6584
Ta.12342.1.S1_at	Os06g27760.1	peptide methionine sulfoxide reductase msrB, putative, expressed	Putative methionine sulfoxide reductase B [Oryza sativa (japonica cultivar-group)]	TA83397_4565	n	n	n	down	n	untreated	2310.32	2495.9	2545.72	1851.59	2785.25	2994.05	252.748	435.233	125.234	233.713	261.145	1033.77
Ta.12342.1.S1_at	Os06g27760.1	peptide methionine sulfoxide reductase msrB, putative, expressed	Putative methionine sulfoxide reductase B [Oryza sativa (japonica cultivar-group)]	TA83397_4565	n	n	n	down	n	treated	2309.43	1861.41	2202.1	947.174	866.687	1803.19	142.475	848.38	331.255	12.927	93.2922	112.205
Ta.12346.1.A1_at	Os05g33630.3	hydrolase, putative, expressed	NA	BQ172156	n	n	n	up	n	untreated	467.58	456.288	532.715	343.841	339.316	185.701	35.7613	100.32	34.8875	37.7089	30.0837	35.4007
Ta.12346.1.A1_at	Os05g33630.3	hydrolase, putative, expressed	NA	BQ172156	n	n	n	up	n	treated	454.277	502.97	439.846	353.901	769.324	321.17	69.3921	150.132	71.112	29.7813	28.2147	69.9018
Ta.12357.1.A1_at	Os02g12290.1	nuclear ribonuclease Z, putative	Nuclear ribonuclease Z [Arabidopsis thaliana (Mouse-ear cress)]	TA79407_4565	n	n	n	down	down	untreated	1036.69	1247.75	1265.54	883.112	1773.77	1315.69	147.934	289.916	343.447	117.466	165.128	125.548
Ta.12357.1.A1_at	Os02g12290.1	nuclear ribonuclease Z, putative	Nuclear ribonuclease Z [Arabidopsis thaliana (Mouse-ear cress)]	TA79407_4565	n	n	n	down	down	treated	1053.54	910.616	734.826	681.676	464.166	650.667	93.5201	228.178	147.055	121.297	48.2903	52.3436
Ta.12357.1.A1_s_at	Os02g12290.1	nuclear ribonuclease Z, putative	Nuclear ribonuclease Z [Arabidopsis thaliana (Mouse-ear cress)]	TA79407_4565	n	n	n	down	down	untreated	588.202	698.89	656.387	474.677	912.721	656.988	101.669	141.726	180.13	53.5329	81.8304	46.7457
Ta.12357.1.A1_s_at	Os02g12290.1	nuclear ribonuclease Z, putative	Nuclear ribonuclease Z [Arabidopsis thaliana (Mouse-ear cress)]	TA79407_4565	n	n	n	down	down	treated	571.084	507.975	391.291	357.388	235.944	309.321	24.7696	146.172	81.8147	27.8902	12.6799	15.8092
Ta.12361.1.A1_at	Os03g03880.1	serine/threonine-protein kinase NAK, putative, expressed	NA	CK152928	n	n	n	down	n	untreated	1364.38	551.982	288.872	446.43	987.745	603.113	187.599	61.3659	42.5366	86.0114	80.7788	158.265
Ta.12361.1.A1_at	Os03g03880.1	serine/threonine-protein kinase NAK, putative, expressed	NA	CK152928	n	n	n	down	n	treated	1379.29	369.17	194.205	237.293	158.867	227.693	154.933	132.506	20.1736	13.2682	40.4105	18.3176
Ta.12364.1.S1_at	Os08g06230.1	nucleolar GTP-binding protein 1, putative, expressed	Nucleolar GTP-binding protein 1-like [Oryza sativa (japonica cultivar-group)]	TA88948_4565	n	n	n	down	n	untreated	167.748	79.0538	153.065	188.124	145.98	137	6.84375	10.7427	19.3006	18.6133	8.02174	22.2153
Ta.12364.1.S1_at	Os08g06230.1	nucleolar GTP-binding protein 1, putative, expressed	Nucleolar GTP-binding protein 1-like [Oryza sativa (japonica cultivar-group)]	TA88948_4565	n	n	n	down	n	treated	149.616	84.9429	129.05	123.639	54.3859	100.66	6.30734	29.1588	18.1437	9.92803	11.1897	15.057
Ta.12368.1.S1_a_at	Os01g47630.1	expressed protein	OSJNBb0063G05.5 [Oryza sativa (japonica cultivar-group)]	TA77534_4565	n	n	down	down	n	untreated	4512.38	4382.32	3574.91	1447.87	5320.71	5380.83	285.408	100.32	301.767	225.382	69.1316	216.931
Ta.12368.1.S1_a_at	Os01g47630.1	expressed protein	OSJNBb0063G05.5 [Oryza sativa (japonica cultivar-group)]	TA77534_4565	n	n	down	down	n	treated	4571.72	2501.68	2317.08	514.944	1328.52	3039.55	83.2938	1754.55	164.594	41.9556	185.983	286.816
Ta.12368.1.S1_x_at	Os01g47630.1	expressed protein	OSJNBb0063G05.5 [Oryza sativa (japonica cultivar-group)]	TA77534_4565	n	n	down	down	n	untreated	4329.68	4252.3	3545.02	1419.4	5180.2	5238	447.688	142.197	342.617	190.559	70.1808	361.931
Ta.12368.1.S1_x_at	Os01g47630.1	expressed protein	OSJNBb0063G05.5 [Oryza sativa (japonica cultivar-group)]	TA77534_4565	n	n	down	down	n	treated	4483.55	2404.79	2109.34	482.835	1212.87	2786.26	89.9051	1659.34	138.891	12.0586	205.092	163.194
Ta.12368.2.S1_x_at	Os01g47630.1	expressed protein	OSJNBb0063G05.5 [Oryza sativa (japonica cultivar-group)]	TA77535_4565	n	n	down	down	down	untreated	4319.45	4171.91	3621.17	1371.81	5250.37	5247.48	328.27	279.505	400.523	196.596	172.725	473.466
Ta.12368.2.S1_x_at	Os01g47630.1	expressed protein	OSJNBb0063G05.5 [Oryza sativa (japonica cultivar-group)]	TA77535_4565	n	n	down	down	down	treated	4538.97	2434.37	2036.89	411.371	1109.19	2604.52	109.892	1697.5	94.5745	30.0809	119.736	170.893
Ta.12368.3.S1_a_at	Os01g47630.1	expressed protein	OSJNBb0063G05.5 [Oryza sativa (japonica cultivar-group)]	CD882747	n	n	down	down	down	untreated	2443.58	2232.47	1802.5	606.345	2647.74	2561.94	391.494	210.447	235.558	53.7215	50.2214	380.092
Ta.12368.3.S1_a_at	Os01g47630.1	expressed protein	OSJNBb0063G05.5 [Oryza sativa (japonica cultivar-group)]	CD882747	n	n	down	down	down	treated	2401.28	1301.11	955.929	206.783	536.05	1184.82	216.232	956.734	110.129	23.414	57.7263	60.9581
Ta.12368.3.S1_at	Os01g47630.1	expressed protein	OSJNBb0063G05.5 [Oryza sativa (japonica cultivar-group)]	CA659155	n	n	n	down	n	untreated	201.331	201.99	181.328	123.069	264.931	280.669	16.3955	34.2208	11.5712	11.5769	32.843	35.991
Ta.12368.3.S1_at	Os01g47630.1	expressed protein	OSJNBb0063G05.5 [Oryza sativa (japonica cultivar-group)]	CA659155	n	n	n	down	n	treated	223.143	157.206	132.492	108.055	129.587	143.457	13.5812	46.818	20.7339	10.7274	14.3289	3.47888
Ta.12382.1.S1_at	Os10g20090.1	CSLH1 - cellulose synthase-like family H, expressed	OSJNBa0042L16.14 protein [Oryza sativa (Rice)]	TA95209_4565	n	n	n	down	down	untreated	784.639	898.793	429.693	335.48	858.608	907.86	35.4067	116.565	43.8303	34.5732	136.24	131.048
Ta.12382.1.S1_at	Os10g20090.1	CSLH1 - cellulose synthase-like family H, expressed	OSJNBa0042L16.14 protein [Oryza sativa (Rice)]	TA95209_4565	n	n	n	down	down	treated	772.549	565.049	312.999	182.844	168.517	225.81	65.3824	360.257	35.8029	8.24328	40.2589	20.121
Ta.12382.1.S1_x_at	Os10g20090.1	CSLH1 - cellulose synthase-like family H, expressed	OSJNBa0042L16.14 protein [Oryza sativa (Rice)]	TA95209_4565	n	n	down	down	down	untreated	715.389	770.586	358.528	307.056	772.899	770.093	77.3069	119.758	50.5621	32.9137	110.923	78.3613
Ta.12382.1.S1_x_at	Os10g20090.1	CSLH1 - cellulose synthase-like family H, expressed	OSJNBa0042L16.14 protein [Oryza sativa (Rice)]	TA95209_4565	n	n	down	down	down	treated	671.831	491.352	282.369	144.356	130.826	171.419	56.9489	298.55	54.1966	10.2596	23.4116	23.4505
Ta.12382.2.S1_at	Os10g20090.1	CSLH1 - cellulose synthase-like family H, expressed	CSLH1 [Oryza sativa (Rice)]	TA106578_4565	n	n	n	down	down	untreated	590.653	1022.97	307.842	235.427	771.652	689.127	79.5033	123.205	18.9656	37.0529	116.491	117.521
Ta.12382.2.S1_at	Os10g20090.1	CSLH1 - cellulose synthase-like family H, expressed	CSLH1 [Oryza sativa (Rice)]	TA106578_4565	n	n	n	down	down	treated	537.405	824.074	251.458	148.938	142.945	123.923	7.2154	608.434	29.2321	7.25545	29.0455	23.7893
Ta.12382.3.S1_at	Os10g20090.1	CSLH1 - cellulose synthase-like family H, expressed	CSLH1 [Oryza sativa (japonica cultivar-group)]	BJ244258	n	n	down	down	down	untreated	754.617	813.027	426.321	386.418	819.546	823.178	33.4955	116.699	59.4479	45.9561	100.066	136.142
Ta.12382.3.S1_at	Os10g20090.1	CSLH1 - cellulose synthase-like family H, expressed	CSLH1 [Oryza sativa (japonica cultivar-group)]	BJ244258	n	n	down	down	down	treated	695.24	569.321	343.562	178.889	99.1045	113.954	55.9778	366.611	85.6681	30.3061	18.9157	19.5515
Ta.12387.1.A1_at	Os03g50310.1	CCT motif family protein, expressed	NA	CA618208	n	n	n	down	down	untreated	1236.24	2726.68	1558.34	1438.57	2378.57	2606.23	381.906	837.823	366.154	429.095	306.228	416.107
Ta.12387.1.A1_at	Os03g50310.1	CCT motif family protein, expressed	NA	CA618208	n	n	n	down	down	treated	1317.66	1503.74	961.611	656.012	226.225	810.984	412.22	819.566	150.53	139.016	67.0193	114.899
Ta.12387.1.A1_x_at	Os03g50310.1	CCT motif family protein, expressed	NA	CA618208	n	n	down	down	down	untreated	1650.79	2847.69	1741.24	1720.13	2716.8	2982.24	500.55	737.584	385.478	478.684	222.184	410.251
Ta.12387.1.A1_x_at	Os03g50310.1	CCT motif family protein, expressed	NA	CA618208	n	n	down	down	down	treated	1661.49	1684.48	1108.05	792.503	244.882	934.519	538.938	899.08	152.836	165.094	78.2854	162.997
Ta.12387.2.S1_s_at	Os03g50310.1	CCT motif family protein, expressed	CCT motif, putative [Oryza sativa (japonica cultivar-group)]	TA73964_4565	n	n	n	down	down	untreated	11432.9	13274.9	11596.4	10303.2	13161.5	13766.4	2276.34	1583.89	852.774	724.676	316.383	2047.98
Ta.12387.2.S1_s_at	Os03g50310.1	CCT motif family protein, expressed	CCT motif, putative [Oryza sativa (japonica cultivar-group)]	TA73964_4565	n	n	n	down	down	treated	11990.6	10172	7764.1	5389.88	1308.5	3875.59	1551.56	4090.23	624.47	233.876	421.96	520.549
Ta.12387.2.S1_x_at	Os03g50310.1	CCT motif family protein, expressed	CCT motif, putative [Oryza sativa (japonica cultivar-group)]	TA73964_4565	n	n	n	down	down	untreated	7308.96	9277.84	6173.71	6444.64	8469.14	9053.56	1633.9	2562.83	771.24	1909.96	671.445	1055.14
Ta.12387.2.S1_x_at	Os03g50310.1	CCT motif family protein, expressed	CCT motif, putative [Oryza sativa (japonica cultivar-group)]	TA73964_4565	n	n	n	down	down	treated	8186.34	5822.25	4508.33	3008.46	716.403	2231.19	1908.73	2856.07	501.433	639.577	236.991	272.817
Ta.12395.1.S1_at	NA	NA	OSJNBa0068L06.12 protein [Oryza sativa (japonica cultivar-group)]	CA673541	n	n	n	down	n	untreated	1005.41	806.272	771.275	1180.58	1147.78	977.518	103.337	77.035	57.01	85.7076	73.5807	64.5362
Ta.12395.1.S1_at	NA	NA	OSJNBa0068L06.12 protein [Oryza sativa (japonica cultivar-group)]	CA673541	n	n	n	down	n	treated	966.259	885.076	807.461	1099.01	430.559	801.352	113.407	293.224	11.6006	90.8706	37.2125	153.099
Ta.12396.1.S1_at	Os11g32210.1	jacalin-like lectin domain containing protein	NA	TA91310_4565	n	n	down	n	n	untreated	812.469	2783.12	249.961	213.894	874.033	829.254	571.66	1361.8	170.238	106.275	1185.83	569.086
Ta.12396.1.S1_at	Os11g32210.1	jacalin-like lectin domain containing protein	NA	TA91310_4565	n	n	down	n	n	treated	777.444	552.246	55.1738	34.037	39.4318	45.2385	283.471	456.65	17.4949	8.09476	12.2292	18.9261
Ta.12400.1.A1_at	Os03g22770.1	CCT motif family protein, expressed	Putative zinc-finger protein [Oryza sativa (japonica cultivar-group)]	BQ172249	n	n	down	n	up	untreated	69.4014	63.7597	545.782	380.134	88.4353	75.7839	14.8109	15.845	55.7572	65.2534	19.8137	27.2352
Ta.12400.1.A1_at	Os03g22770.1	CCT motif family protein, expressed	Putative zinc-finger protein [Oryza sativa (japonica cultivar-group)]	BQ172249	n	n	down	n	up	treated	60.258	122.928	300.442	189.774	176.672	212.277	16.1168	38.7071	32.0067	7.38562	35.2322	16.4705
Ta.12407.1.A1_at	Os06g20200.1	gibberellin receptor GID1L2, putative, expressed	Putative esterase [Oryza sativa (japonica cultivar-group)]	BQ172256	n	n	n	n	down	untreated	373.212	310.339	259.524	196.023	207.538	225.73	73.321	57.3141	35.1715	31.6736	8.77571	15.7238
Ta.12407.1.A1_at	Os06g20200.1	gibberellin receptor GID1L2, putative, expressed	Putative esterase [Oryza sativa (japonica cultivar-group)]	BQ172256	n	n	n	n	down	treated	340.37	254.324	169.068	108.499	160.025	92.307	16.9356	137.585	1.56181	11.5324	18.6552	14.7915
Ta.12410.1.A1_at	Os02g42220.1	transposon protein, putative, unclassified, expressed	Oligopeptide transporter OPT-like [Oryza sativa (japonica cultivar-group)]	TA79323_4565	n	n	n	down	n	untreated	447.082	577.948	735.3	581.781	610.522	472.478	47.6231	57.4556	188.442	216.599	45.4752	34.0958
Ta.12410.1.A1_at	Os02g42220.1	transposon protein, putative, unclassified, expressed	Oligopeptide transporter OPT-like [Oryza sativa (japonica cultivar-group)]	TA79323_4565	n	n	n	down	n	treated	418.181	522.809	520.837	244.395	245.158	592.785	17.766	248.225	36.0618	27.802	21.5874	36.0216
Ta.12410.2.S1_at	Os02g42220.1	transposon protein, putative, unclassified, expressed	Oligopeptide transporter OPT-like [Oryza sativa (japonica cultivar-group)]	CA607513	n	n	n	down	n	untreated	368.263	403.647	454.13	421.348	490.297	407.805	24.3861	40.1658	90.4684	195.008	25.8622	14.6451
Ta.12410.2.S1_at	Os02g42220.1	transposon protein, putative, unclassified, expressed	Oligopeptide transporter OPT-like [Oryza sativa (japonica cultivar-group)]	CA607513	n	n	n	down	n	treated	361.847	374.772	370.435	186.468	218.913	455.151	11.8689	189.718	13.3984	15.2631	19.5552	37.2655
Ta.12416.1.A1_at	Os01g09770.1	expressed protein	P0671B11.30 [Oryza sativa (japonica cultivar-group)]	BQ172293	n	n	up	up	n	untreated	130.933	85.3096	45.1568	55.73	82.8591	89.0139	45.7037	9.13632	6.50122	4.95644	9.5169	21.4199
Ta.12416.1.A1_at	Os01g09770.1	expressed protein	P0671B11.30 [Oryza sativa (japonica cultivar-group)]	BQ172293	n	n	up	up	n	treated	126.699	97.0119	72.8731	129.093	368.124	217.647	33.83	31.7955	10.0236	9.37835	25.6841	23.8107
Ta.12422.3.S1_a_at	Os02g40510.1	two-component response regulator-like PRR1, putative, expressed	Two-component response regulator-like PRR1 [Oryza sativa (Rice)]	TA73377_4565	n	n	n	up	n	untreated	191.153	60.0576	490.637	2114.01	119.17	57.3289	6.44259	24.417	78.8033	130.687	17.0728	20.9886
Ta.12422.3.S1_a_at	Os02g40510.1	two-component response regulator-like PRR1, putative, expressed	Two-component response regulator-like PRR1 [Oryza sativa (Rice)]	TA73377_4565	n	n	n	up	n	treated	171.835	610.466	500.529	1705.28	250.395	88.294	43.3834	959.565	98.856	10.5886	37.0831	7.51051
Ta.12425.1.A1_at	Os01g49890.1	threonine synthase, chloroplast precursor, putative, expressed	Threonine synthase-like [Oryza sativa (japonica cultivar-group)]	TA80413_4565	n	n	n	down	down	untreated	7171.46	7719.35	6030.99	5459.07	5863.62	6970.01	1204.38	371.116	371.702	390.8	810.489	59.2615
Ta.12425.1.A1_at	Os01g49890.1	threonine synthase, chloroplast precursor, putative, expressed	Threonine synthase-like [Oryza sativa (japonica cultivar-group)]	TA80413_4565	n	n	n	down	down	treated	6791.52	5388.37	5315.37	3972.28	904.232	2054.32	280.028	1453.94	965.736	288.658	195.223	407.805
Ta.12432.1.A1_at	Os08g40590.1	oxysterol-binding protein OBPa, putative, expressed	Oxysterol-binding protein-like [Oryza sativa (japonica cultivar-group)]	TA83791_4565	n	n	n	up	up	untreated	748.889	405.604	326.768	246.252	208.113	152.965	141.406	35.9246	7.6528	9.09187	12.7869	36.7957
Ta.12432.1.A1_at	Os08g40590.1	oxysterol-binding protein OBPa, putative, expressed	Oxysterol-binding protein-like [Oryza sativa (japonica cultivar-group)]	TA83791_4565	n	n	n	up	up	treated	684.28	428.007	275.743	257.941	570.262	539.839	274.428	169.545	44.0577	4.83686	38.6528	30.2024
Ta.12433.1.A1_at	Os01g54580.1	solute carrier family 35 member C2, putative, expressed	NA	TA101807_4565	n	n	n	up	n	untreated	120.012	197.998	204.325	194.23	126.93	114.942	10.6166	23.2156	25.8383	19.4777	21.3885	56.741
Ta.12433.1.A1_at	Os01g54580.1	solute carrier family 35 member C2, putative, expressed	NA	TA101807_4565	n	n	n	up	n	treated	116.737	268.452	250.758	286.183	379.172	237.776	10.0086	57.259	35.7702	9.66473	7.63981	9.08362
Ta.12434.1.S1_at	Os04g37760.1	expressed protein	OSJNBa0086B14.7 protein [Oryza sativa (japonica cultivar-group)]	TA80857_4565	n	n	n	down	n	untreated	2129.96	5377.83	1601.33	1062.88	1361.68	1154.82	798.493	1150.36	241.578	581.267	611.272	697.176
Ta.12434.1.S1_at	Os04g37760.1	expressed protein	OSJNBa0086B14.7 protein [Oryza sativa (japonica cultivar-group)]	TA80857_4565	n	n	n	down	n	treated	2112.29	3055.66	1090.67	449.553	168.643	176.426	441.807	2302.46	226.968	13.0367	44.4231	84.4659
Ta.1244.1.S1_x_at	Os12g43490.1	alpha-amylase/trypsin inhibitor, putative, expressed	Thaumatin-like protein [Triticum aestivum (Wheat)]	CK198229	n	n	down	down	down	untreated	1443.3	1034.89	1019.85	1610.96	1147.86	992.169	100.262	42.1029	100.645	391.334	25.3549	98.0916
Ta.1244.1.S1_x_at	Os12g43490.1	alpha-amylase/trypsin inhibitor, putative, expressed	Thaumatin-like protein [Triticum aestivum (Wheat)]	CK198229	n	n	down	down	down	treated	1339.74	770.541	600.69	788.226	283.299	201.828	198.92	48.6294	100.585	131.43	29.9683	23.4847
Ta.12446.1.A1_at	Os06g06040.1	S-adenosylmethionine-dependent methyltransferase/ methyltransferase/ thiopurine S-methyltransferase, putative, expressed	Putative methyl chloride transferase [Oryza sativa (japonica cultivar-group)]	BQ172352	n	n	n	down	down	untreated	515.922	358.814	523.919	483.374	531.722	447.638	108.241	106.896	141.822	77.3462	88.405	91.3214
Ta.12446.1.A1_at	Os06g06040.1	S-adenosylmethionine-dependent methyltransferase/ methyltransferase/ thiopurine S-methyltransferase, putative, expressed	Putative methyl chloride transferase [Oryza sativa (japonica cultivar-group)]	BQ172352	n	n	n	down	down	treated	534.519	386.738	278.226	277.477	216.624	183.338	112.597	65.1574	68.1086	41.6197	28.3463	11.9016
Ta.12447.1.A1_at	Os05g37120.1	sec23/Sec24 trunk domain containing protein, expressed	Hypothetical protein OSJNBa0020H14.12 [Oryza sativa (japonica cultivar-group)]	BQ172356	n	n	up	up	n	untreated	127.879	163.89	120.395	106.612	100.758	92.8336	6.35248	20.3422	18.9046	8.57021	14.8051	50.7975
Ta.12447.1.A1_at	Os05g37120.1	sec23/Sec24 trunk domain containing protein, expressed	Hypothetical protein OSJNBa0020H14.12 [Oryza sativa (japonica cultivar-group)]	BQ172356	n	n	up	up	n	treated	117.318	223.533	195.035	218.044	286.267	169.603	5.92904	9.019	16.294	41.1222	24.794	12.2876
Ta.12448.1.A1_at	Os04g54180.1	serine/threonine-protein kinase receptor precursor, putative	H0315F07.2 protein [Oryza sativa (Rice)]	CD875890	n	n	up	up	up	untreated	303.245	446.818	486.666	395.097	157.738	192.06	69.081	13.3137	30.4725	76.3406	57.8801	101.896
Ta.12448.1.A1_at	Os04g54180.1	serine/threonine-protein kinase receptor precursor, putative	H0315F07.2 protein [Oryza sativa (Rice)]	CD875890	n	n	up	up	up	treated	243.317	817.598	765.51	1014.92	752.388	1311.24	43.6549	270.053	100.375	131.187	22.3502	137.136
Ta.12452.1.S1_at	Os09g01590.1	gastric triacylglycerol lipase precursor, putative, expressed	NA	TA107283_4565	n	n	down	n	n	untreated	790.824	542.723	1228.08	1037.65	921.986	826.678	72.9378	132.722	131.045	220.068	111.484	96.8528
Ta.12452.1.S1_at	Os09g01590.1	gastric triacylglycerol lipase precursor, putative, expressed	NA	TA107283_4565	n	n	down	n	n	treated	741.089	466.566	687.66	438.87	511.623	898.572	72.3647	32.9356	116.715	15.5104	90.3044	104.013
Ta.12457.1.S1_x_at	Os01g04260.1	delta-7-sterol-C5, putative, expressed	Putative sterol-C5(6)-desaturase [Oryza sativa (japonica cultivar-group)]	TA75927_4565	n	n	down	n	n	untreated	373.053	298.478	623.055	834.936	416.764	335.853	65.0465	13.6283	45.7937	59.1117	48.683	47.128
Ta.12457.1.S1_x_at	Os01g04260.1	delta-7-sterol-C5, putative, expressed	Putative sterol-C5(6)-desaturase [Oryza sativa (japonica cultivar-group)]	TA75927_4565	n	n	down	n	n	treated	365.339	345.146	387.045	406.059	225.245	267.166	55.9946	30.9416	5.63229	25.1243	7.70673	23.0801
Ta.12458.1.S1_at	Os04g51390.1	apospory-associated protein C, putative, expressed	OSJNBa0041A02.19 protein [Oryza sativa (japonica cultivar-group)]	TA54205_4565	n	n	n	down	n	untreated	2093.81	1407.27	1813.43	1372.77	1817.59	1905.23	145.37	395.321	95.5392	90.5889	269.994	252.383
Ta.12458.1.S1_at	Os04g51390.1	apospory-associated protein C, putative, expressed	OSJNBa0041A02.19 protein [Oryza sativa (japonica cultivar-group)]	TA54205_4565	n	n	n	down	n	treated	2247.5	1201.15	1200.12	1098.76	858.164	1201.83	269.025	85.6803	130.869	55.84	77.351	8.23835
Ta.12460.1.A1_at	Os03g49720.1	structural molecule, putative, expressed	Putative PAP_fibrillin [Oryza sativa (japonica cultivar-group)]	TA88455_4565	n	n	n	down	n	untreated	2628.51	2114.14	3249.57	2562.15	2451.42	2675.04	278.352	172.305	180.578	312.457	163.033	473.593
Ta.12460.1.A1_at	Os03g49720.1	structural molecule, putative, expressed	Putative PAP_fibrillin [Oryza sativa (japonica cultivar-group)]	TA88455_4565	n	n	n	down	n	treated	2716.97	1534.24	2368.08	1359.28	266.013	959.583	229.507	207.25	127.363	107.77	85.1006	235.684
Ta.12460.2.S1_at	Os03g49720.1	structural molecule, putative, expressed	Putative PAP_fibrillin [Oryza sativa (japonica cultivar-group)]	CA656650	n	n	n	down	n	untreated	2254.58	1968.01	2768.95	2336.03	2069.89	2310.44	326.223	97.8275	112.94	237.131	171.242	316.532
Ta.12460.2.S1_at	Os03g49720.1	structural molecule, putative, expressed	Putative PAP_fibrillin [Oryza sativa (japonica cultivar-group)]	CA656650	n	n	n	down	n	treated	2246.43	1479.07	2504.8	1437.91	328.136	1033.96	285.67	182.793	559.082	205.725	19.0113	169.189
Ta.12464.1.S1_at	Os08g31170.1	protein binding protein, putative	NA	CA684599	n	n	up	n	n	untreated	57.1004	40.8547	57.5112	48.4125	62.7896	64.9216	3.91509	3.26978	7.29865	2.88922	3.01789	7.38916
Ta.12464.1.S1_at	Os08g31170.1	protein binding protein, putative	NA	CA684599	n	n	up	n	n	treated	56.3411	92.8343	109.819	149.176	118.869	99.2963	9.54714	65.3835	13.609	22.6221	9.70493	11.9148
Ta.12466.1.A1_at	Os03g46640.1	deoxyuridine 5-triphosphate nucleotidohydrolase, putative, expressed	Putative deoxyuridine triphosphatase [Oryza sativa (japonica cultivar-group)]	BQ172402	n	n	n	down	n	untreated	143.19	76.2175	85.4771	160.643	137.316	107.8	32.4249	8.08518	4.51103	20.0393	13.6108	35.5906
Ta.12466.1.A1_at	Os03g46640.1	deoxyuridine 5-triphosphate nucleotidohydrolase, putative, expressed	Putative deoxyuridine triphosphatase [Oryza sativa (japonica cultivar-group)]	BQ172402	n	n	n	down	n	treated	183.417	63.5375	52.5016	87.4175	36.255	49.1172	52.1192	2.44156	7.06302	7.69462	3.43083	8.21471
Ta.12468.1.S1_at	Os04g51930.1	retrotransposon protein, putative, LINE subclass	NA	TA82405_4565	n	n	n	down	down	untreated	355.578	199.724	396.679	433.782	313.404	322.418	27.6058	49.1923	30.0763	35.5995	30.5337	51.3951
Ta.12468.1.S1_at	Os04g51930.1	retrotransposon protein, putative, LINE subclass	NA	TA82405_4565	n	n	n	down	down	treated	357.431	210.573	268.126	232.617	114.416	130.551	53.3459	19.293	17.3333	12.8687	25.5662	10.852
Ta.12472.1.S1_x_at	Os10g02040.1	peroxidase 54 precursor, putative, expressed	Putative peroxidase [Oryza sativa (Rice)]	TA66392_4565	n	n	n	down	n	untreated	525.37	433.459	5914.5	5738.87	367.954	215.887	106.039	338.335	398.108	1946.08	81.9727	127.874
Ta.12472.1.S1_x_at	Os10g02040.1	peroxidase 54 precursor, putative, expressed	Putative peroxidase [Oryza sativa (Rice)]	TA66392_4565	n	n	n	down	n	treated	469.283	1039.62	5528.06	2198.98	137.947	74.06	51.862	1036.64	865.59	98.8924	22.147	3.46006
Ta.12478.1.A1_at	Os05g28370.1	expressed protein	AT5g58570/mzn1_20 [Arabidopsis thaliana (Mouse-ear cress)]	TA96123_4565	n	n	n	down	down	untreated	539.391	299.693	443.443	535.593	526.19	490.269	77.0504	53.6734	6.90489	99.5261	9.76754	68.396
Ta.12478.1.A1_at	Os05g28370.1	expressed protein	AT5g58570/mzn1_20 [Arabidopsis thaliana (Mouse-ear cress)]	TA96123_4565	n	n	n	down	down	treated	531.32	280.925	368.802	314.477	133.691	225.439	62.6155	50.4692	17.997	20.4922	11.6005	23.412
Ta.12487.1.S1_at	Os12g07650.1	OsGrx_S16 - glutaredoxin subgroup II, expressed	Glutaredoxin, putative [Oryza sativa (japonica cultivar-group)]	TA83490_4565	n	n	n	down	n	untreated	1763.38	1428.22	1551.9	2006.79	1649.78	1859.02	96.635	27.9733	101.333	277.37	186.409	373.921
Ta.12487.1.S1_at	Os12g07650.1	OsGrx_S16 - glutaredoxin subgroup II, expressed	Glutaredoxin, putative [Oryza sativa (japonica cultivar-group)]	TA83490_4565	n	n	n	down	n	treated	1838.65	1141.57	1548.21	1516.29	579.98	881.568	88.2826	139.807	347.827	281.718	28.7672	63.9454
Ta.1249.1.S1_at	Os09g06464.1	zinc finger protein CONSTANS-LIKE 2, putative, expressed	CONSTANS-like protein [Hordeum vulgare var. distichum (Two-rowed barley)]	TA51726_4565	n	n	down	down	n	untreated	3693.97	2792.83	2219	1927.44	2678.96	2233.68	263.917	1098.28	515.935	313.592	332.859	216.88
Ta.1249.1.S1_at	Os09g06464.1	zinc finger protein CONSTANS-LIKE 2, putative, expressed	CONSTANS-like protein [Hordeum vulgare var. distichum (Two-rowed barley)]	TA51726_4565	n	n	down	down	n	treated	3604.85	2182.48	1843.9	928.416	457.245	1260.24	314.816	1151.47	127.344	125.71	37.0694	175.24
Ta.12499.1.S1_at	Os03g16010.1	BRASSINOSTEROID INSENSITIVE 1-associated receptor kinase 1 precursor, putative, expressed	Protein kinase, putative [Arabidopsis thaliana (Mouse-ear cress)]	TA82837_4565	n	n	n	down	n	untreated	117.858	287.891	135.219	275.351	233.107	201.744	9.1263	44.5339	10.237	19.5027	16.0003	19.7604
Ta.12499.1.S1_at	Os03g16010.1	BRASSINOSTEROID INSENSITIVE 1-associated receptor kinase 1 precursor, putative, expressed	Protein kinase, putative [Arabidopsis thaliana (Mouse-ear cress)]	TA82837_4565	n	n	n	down	n	treated	106.144	245.365	146.591	215.189	88.5545	147.409	16.4459	39.3019	33.553	29.614	17.6746	27.0396
Ta.12499.2.A1_a_at	Os03g16010.1	BRASSINOSTEROID INSENSITIVE 1-associated receptor kinase 1 precursor, putative, expressed	Protein kinase, putative [Arabidopsis thaliana (Mouse-ear cress)]	TA82837_4565	n	n	n	down	n	untreated	58.3282	151.828	52.3773	145.689	121.947	83.0379	11.3162	24.8838	12.0936	25.889	18.1017	5.52186
Ta.12499.2.A1_a_at	Os03g16010.1	BRASSINOSTEROID INSENSITIVE 1-associated receptor kinase 1 precursor, putative, expressed	Protein kinase, putative [Arabidopsis thaliana (Mouse-ear cress)]	TA82837_4565	n	n	n	down	n	treated	37.0167	133.292	49.8467	111.161	17.0129	54.7978	6.12412	43.3889	5.0912	19.7314	3.4682	16.2925
Ta.12499.2.A1_at	Os03g16010.1	BRASSINOSTEROID INSENSITIVE 1-associated receptor kinase 1 precursor, putative, expressed	Protein kinase, putative [Arabidopsis thaliana (Mouse-ear cress)]	TA82837_4565	n	n	n	down	n	untreated	96.4562	255.592	115.417	289.874	207.831	153.903	12.522	40.1625	22.6487	49.0769	33.1195	20.9078
Ta.12499.2.A1_at	Os03g16010.1	BRASSINOSTEROID INSENSITIVE 1-associated receptor kinase 1 precursor, putative, expressed	Protein kinase, putative [Arabidopsis thaliana (Mouse-ear cress)]	TA82837_4565	n	n	n	down	n	treated	73.3054	240.567	133.552	210.685	32.8896	120.676	7.49382	58.6181	27.7597	24.5058	8.24933	30.0763
Ta.1250.1.S1_at	Os04g31070.1	acyl-desaturase, chloroplast precursor, putative, expressed	Acyl-[acyl-carrier-protein] desaturase, chloroplast precursor [Oryza sativa (Rice)]	TA59323_4565	n	n	up	up	n	untreated	673.203	2547.34	1019.87	1055.61	1075.92	1115.18	33.4158	283.608	30.9395	30.6282	43.406	397.672
Ta.1250.1.S1_at	Os04g31070.1	acyl-desaturase, chloroplast precursor, putative, expressed	Acyl-[acyl-carrier-protein] desaturase, chloroplast precursor [Oryza sativa (Rice)]	TA59323_4565	n	n	up	up	n	treated	563.557	2859.86	1762.94	2339.8	3509.46	999.98	46.0109	468.052	232.79	75.4804	194.696	28.5357
Ta.12508.1.S1_at	Os10g35010.1	ATTIC110/TIC110, putative, expressed	Chloroplast inner envelope protein, putative [Oryza sativa (japonica cultivar-group)]	TA73454_4565	n	n	n	down	down	untreated	1589.66	817.847	788.064	1077.39	1418.51	1746.93	205.278	58.032	87.3836	166.115	181.169	360.621
Ta.12508.1.S1_at	Os10g35010.1	ATTIC110/TIC110, putative, expressed	Chloroplast inner envelope protein, putative [Oryza sativa (japonica cultivar-group)]	TA73454_4565	n	n	n	down	down	treated	1550.64	680.482	711.943	769.315	307.695	608.66	180.535	42.3526	179.096	91.2272	18.8012	81.307
Ta.12509.1.A1_at	Os04g46892.1	expressed protein	OSJNBb0012E24.4 protein [Oryza sativa (japonica cultivar-group)]	TA77962_4565	n	n	n	up	up	untreated	702.676	1175.16	794.405	906.635	813.445	645.86	44.0385	79.9973	59.2376	83.0422	43.2248	172.366
Ta.12509.1.A1_at	Os04g46892.1	expressed protein	OSJNBb0012E24.4 protein [Oryza sativa (japonica cultivar-group)]	TA77962_4565	n	n	n	up	up	treated	617.481	1454.89	1123.42	1481.22	1802.45	1788.8	59.2993	125.881	200.261	188.445	22.6196	22.8451
Ta.12511.1.S1_at	Os01g16170.2	PQ loop repeat family protein, expressed	Hypothetical protein At2g41050 [Arabidopsis thaliana (Mouse-ear cress)]	TA82752_4565	n	n	down	up	n	untreated	395.069	219.8	712.052	443.086	234.513	298.674	29.3195	28.0811	65.8112	41.3402	44.6669	85.8294
Ta.12511.1.S1_at	Os01g16170.2	PQ loop repeat family protein, expressed	Hypothetical protein At2g41050 [Arabidopsis thaliana (Mouse-ear cress)]	TA82752_4565	n	n	down	up	n	treated	412.283	248.576	458.73	202.151	561.111	458.67	97.8499	49.1884	64.2656	32.8416	115.648	134.176
Ta.12514.2.S1_at	Os07g39630.1	calcium-binding protein 39, putative, expressed	Putative MO25-like protein At5g47540 [Arabidopsis thaliana (Mouse-ear cress)]	TA51070_4565	n	n	n	down	n	untreated	195.988	166.812	194.917	197.965	220.72	211.908	4.2726	8.41627	14.0553	25.2564	4.16379	14.6024
Ta.12514.2.S1_at	Os07g39630.1	calcium-binding protein 39, putative, expressed	Putative MO25-like protein At5g47540 [Arabidopsis thaliana (Mouse-ear cress)]	TA51070_4565	n	n	n	down	n	treated	185.798	141.072	149.098	133.315	110.577	129.181	14.3845	16.2272	20.4941	1.7983	12.735	2.28358
Ta.12517.1.S1_at	Os07g01560.1	sugar transport protein 1, putative, expressed	Monosaccharide transporter 3 [Oryza sativa (Rice)]	CK194979	n	up	up	up	n	untreated	629.565	1564.93	2148.26	1357.99	337.458	775.444	126.784	577.186	169.027	219.637	65.7734	928.584
Ta.12517.1.S1_at	Os07g01560.1	sugar transport protein 1, putative, expressed	Monosaccharide transporter 3 [Oryza sativa (Rice)]	CK194979	n	up	up	up	n	treated	619.598	4111.22	6835.04	5570.53	4944.29	4559.85	197.693	2071.78	1060.54	558.988	481.329	670.165
Ta.12517.2.S1_a_at	Os07g01560.1	sugar transport protein 1, putative, expressed	Monosaccharide transporter 3 [Oryza sativa (Rice)]	CA681881	n	up	up	up	n	untreated	482.839	850.665	1172.37	712.808	302.802	477.125	5.37027	308.292	227.865	56.654	29.8134	243.883
Ta.12517.2.S1_a_at	Os07g01560.1	sugar transport protein 1, putative, expressed	Monosaccharide transporter 3 [Oryza sativa (Rice)]	CA681881	n	up	up	up	n	treated	507.136	2299.77	3763.9	3518.47	2877.22	2229.78	44.1447	1181.83	202.982	495.265	369.241	175.192
Ta.12517.2.S1_x_at	Os07g01560.1	sugar transport protein 1, putative, expressed	Monosaccharide transporter 3 [Oryza sativa (Rice)]	CA681881	n	up	up	up	up	untreated	423.316	751.406	1031.86	638.877	377.225	545.19	24.3307	231.063	158.994	85.0192	25.1159	153.757
Ta.12517.2.S1_x_at	Os07g01560.1	sugar transport protein 1, putative, expressed	Monosaccharide transporter 3 [Oryza sativa (Rice)]	CA681881	n	up	up	up	up	treated	477.153	1887.09	3277.35	2695.82	2380.46	1910.24	8.41929	877.671	177.983	375.661	145.096	132.294
Ta.12517.3.S1_x_at	Os07g01560.1	sugar transport protein 1, putative, expressed	Monosaccharide transporter 3 [Oryza sativa (Rice)]	CA664955	n	up	up	up	n	untreated	852.846	1153.06	1391.3	1061.64	656.896	848.664	13.9579	256.439	147.718	160.666	90.7541	297.605
Ta.12517.3.S1_x_at	Os07g01560.1	sugar transport protein 1, putative, expressed	Monosaccharide transporter 3 [Oryza sativa (Rice)]	CA664955	n	up	up	up	n	treated	947.182	2739.6	4491.14	4168.82	3177.79	2690.77	75.5205	1184.09	176.093	556.369	332.959	156.853
Ta.12518.1.S1_at	Os03g40110.1	nop14-like family protein, expressed	Hypothetical protein OJ1523_A02.5 [Oryza sativa (japonica cultivar-group)]	TA82435_4565	n	n	n	down	n	untreated	98.9727	110.807	115.947	181.857	158.775	135.302	23.3326	7.45182	3.3511	11.9777	21.203	10.8944
Ta.12518.1.S1_at	Os03g40110.1	nop14-like family protein, expressed	Hypothetical protein OJ1523_A02.5 [Oryza sativa (japonica cultivar-group)]	TA82435_4565	n	n	n	down	n	treated	104.527	119.883	124.179	160.387	68.2583	101.881	10.8308	35.6411	3.1671	14.8088	1.77986	20.4327
Ta.12532.1.S1_at	Os02g48000.1	TBC domain containing protein, expressed	GTPase activating protein-like [Oryza sativa (japonica cultivar-group)]	TA50001_4565	n	n	n	up	up	untreated	2009.11	1942.24	2028.62	2006.62	2248.24	2360.64	69.4867	86.7281	66.0315	54.9686	138.356	480.228
Ta.12532.1.S1_at	Os02g48000.1	TBC domain containing protein, expressed	GTPase activating protein-like [Oryza sativa (japonica cultivar-group)]	TA50001_4565	n	n	n	up	up	treated	1982.46	2019.14	1812.95	1812.35	6090.33	8853.25	84.0057	126.678	151.13	95.7062	625.204	284.862
Ta.12546.1.S1_at	Os03g14370.2	ACR8, putative, expressed	Putative ACT domain-containing protein [Oryza sativa (japonica cultivar-group)]	TA93442_4565	n	n	up	up	n	untreated	576.575	242.577	200.793	117.385	167.371	131.052	232.711	26.6212	21.3877	13.9686	25.8235	26.7902
Ta.12546.1.S1_at	Os03g14370.2	ACR8, putative, expressed	Putative ACT domain-containing protein [Oryza sativa (japonica cultivar-group)]	TA93442_4565	n	n	up	up	n	treated	553.584	344.098	281.397	350.716	389.85	197.208	174.215	82.4166	57.7874	17.3176	54.1188	39.4128
Ta.12561.1.S1_at	Os07g27810.1	fiber protein Fb34, putative, expressed	Hypothetical protein P0038F09.45 [Oryza sativa (japonica cultivar-group)]	TA58596_4565	n	n	n	n	up	untreated	525.308	2437.05	796.95	636.745	879.143	1065.03	75.8966	536.489	87.1917	206.352	147.786	553.762
Ta.12561.1.S1_at	Os07g27810.1	fiber protein Fb34, putative, expressed	Hypothetical protein P0038F09.45 [Oryza sativa (japonica cultivar-group)]	TA58596_4565	n	n	n	n	up	treated	487.507	2193.22	1019.44	1333.65	1304.02	3862.67	114.49	769.812	208.751	77.4997	108.436	574.73
Ta.12561.1.S1_x_at	Os07g27810.1	fiber protein Fb34, putative, expressed	Hypothetical protein P0038F09.45 [Oryza sativa (japonica cultivar-group)]	TA58596_4565	n	n	n	n	up	untreated	237.298	1129.61	346.954	283.354	416.78	486.959	30.4187	212.208	32.1663	98.1958	71.756	278.901
Ta.12561.1.S1_x_at	Os07g27810.1	fiber protein Fb34, putative, expressed	Hypothetical protein P0038F09.45 [Oryza sativa (japonica cultivar-group)]	TA58596_4565	n	n	n	n	up	treated	249.181	982.31	465.097	642.393	654.509	1904.14	45.6346	292.325	88.6902	24.663	25.0152	272.787
Ta.12561.2.S1_x_at	Os07g27810.1	fiber protein Fb34, putative, expressed	Hypothetical protein P0038F09.45 [Oryza sativa (japonica cultivar-group)]	CD454620	n	n	n	up	n	untreated	209.359	569.009	208.092	289.494	350.836	609.15	45.4952	204.153	19.7198	128.317	93.8131	528.233
Ta.12561.2.S1_x_at	Os07g27810.1	fiber protein Fb34, putative, expressed	Hypothetical protein P0038F09.45 [Oryza sativa (japonica cultivar-group)]	CD454620	n	n	n	up	n	treated	249.002	644.095	388.394	700.085	1021.7	972.595	59.5307	95.9338	23.1382	34.7514	81.5146	105.621
Ta.12561.3.S1_at	Os07g27810.1	fiber protein Fb34, putative, expressed	Hypothetical protein P0038F09.45 [Oryza sativa (japonica cultivar-group)]	TA58615_4565	n	n	n	up	n	untreated	132.616	221.545	101.435	154.432	200.12	316.317	24.56	71.8973	21.2282	84.543	48.4014	280.531
Ta.12561.3.S1_at	Os07g27810.1	fiber protein Fb34, putative, expressed	Hypothetical protein P0038F09.45 [Oryza sativa (japonica cultivar-group)]	TA58615_4565	n	n	n	up	n	treated	156.732	340.394	189.534	437.274	963.22	524.836	47.0488	75.1188	31.0405	14.2483	271.379	82.2668
Ta.12561.3.S1_x_at	Os07g27810.1	fiber protein Fb34, putative, expressed	Hypothetical protein P0038F09.45 [Oryza sativa (japonica cultivar-group)]	TA58615_4565	n	n	n	up	n	untreated	128.154	228.507	113.918	156.227	177.943	286.439	34.5971	68.8078	14.7749	72.2746	52.4932	233.216
Ta.12561.3.S1_x_at	Os07g27810.1	fiber protein Fb34, putative, expressed	Hypothetical protein P0038F09.45 [Oryza sativa (japonica cultivar-group)]	TA58615_4565	n	n	n	up	n	treated	131.312	308.696	180.976	338.533	618.831	469.227	50.1038	67.018	25.2993	18.4324	127.827	63.8088
Ta.12565.2.S1_at	Os07g37250.1	chloroplast-localized Ptr ToxA-binding protein1, putative, expressed	Inositol phosphatase-like protein [Oryza sativa (japonica cultivar-group)]	TA51301_4565	n	n	n	down	n	untreated	7276.14	5822.02	6602.38	6985.51	6321.85	6336.98	148.748	186.041	220.515	355.895	120.537	715.317
Ta.12565.2.S1_at	Os07g37250.1	chloroplast-localized Ptr ToxA-binding protein1, putative, expressed	Inositol phosphatase-like protein [Oryza sativa (japonica cultivar-group)]	TA51301_4565	n	n	n	down	n	treated	7442.22	5118.61	5506.03	4980.45	1251.78	3838.02	246.455	356.893	338.494	464.553	138.721	194.187
Ta.12565.3.S1_a_at	Os02g38050.1	PB1 domain containing protein, expressed	Putative ubiquitin-associated (UBA) protein [Oryza sativa (japonica cultivar-group)]	TA51059_4565	n	n	n	n	up	untreated	5361.09	3829.11	5236.39	6016.16	5983.98	4854.32	484.509	713.812	651.333	1506.74	361.654	995.045
Ta.12565.3.S1_a_at	Os02g38050.1	PB1 domain containing protein, expressed	Putative ubiquitin-associated (UBA) protein [Oryza sativa (japonica cultivar-group)]	TA51059_4565	n	n	n	n	up	treated	5299.6	3637.46	4458.76	3482.97	5797.72	12302.2	565.143	163.932	343.664	111.137	596.273	959.925
Ta.12568.2.S1_a_at	Os12g16410.1	isoflavone reductase, putative, expressed	Isoflavone reductase homolog [Lupinus albus (White lupin)]	TA75748_4565	n	n	n	n	up	untreated	378.451	450.768	257.892	377.753	389.892	327.87	72.613	82.2943	37.1241	62.6494	37.4947	49.8095
Ta.12568.2.S1_a_at	Os12g16410.1	isoflavone reductase, putative, expressed	Isoflavone reductase homolog [Lupinus albus (White lupin)]	TA75748_4565	n	n	n	n	up	treated	344.471	530.585	348.587	506.391	664.901	1098.79	38.6031	51.2773	5.40945	27.2258	81.421	42.6445
Ta.12568.2.S1_x_at	Os12g16410.1	isoflavone reductase, putative, expressed	Isoflavone reductase homolog [Lupinus albus (White lupin)]	TA75748_4565	n	n	n	n	up	untreated	268.748	329.627	193.785	293.685	278.043	254.728	66.8174	71.0921	12.597	77.5052	37.8117	38.0255
Ta.12568.2.S1_x_at	Os12g16410.1	isoflavone reductase, putative, expressed	Isoflavone reductase homolog [Lupinus albus (White lupin)]	TA75748_4565	n	n	n	n	up	treated	239.566	403.648	263.469	394.964	508.053	797.223	39.9521	44.7139	17.7577	25.9818	76.4948	31.4284
Ta.1258.1.S1_a_at	Os11g26850.1	adenosylhomocysteinase, putative, expressed	Adenosylhomocysteinase [Triticum aestivum (Wheat)]	CJ614909	n	up	up	n	n	untreated	11106.1	19495.3	5000.58	6354.46	17488.9	17241.6	794.579	4769.51	1036.11	1849.75	3474.78	1046.09
Ta.1258.1.S1_a_at	Os11g26850.1	adenosylhomocysteinase, putative, expressed	Adenosylhomocysteinase [Triticum aestivum (Wheat)]	CJ614909	n	up	up	n	n	treated	9944.03	21640.1	15557.4	20219.5	25242.3	25539.9	941.579	1397.94	1078.33	250.008	1777.94	639.227
Ta.1258.2.S1_x_at	Os11g26850.1	adenosylhomocysteinase, putative, expressed	Adenosylhomocysteinase [Triticum aestivum (Wheat)]	CJ588708	n	up	up	n	n	untreated	8212.71	16937.9	2319.17	3786.34	13874.8	13515.5	666.628	6163.22	488.582	1082.23	3716.01	1094.23
Ta.1258.2.S1_x_at	Os11g26850.1	adenosylhomocysteinase, putative, expressed	Adenosylhomocysteinase [Triticum aestivum (Wheat)]	CJ588708	n	up	up	n	n	treated	6648.56	18656.5	11416.7	17009.6	23442.7	24637	755.245	1867.96	837.773	908.098	1150.16	356.366
Ta.12582.1.S1_at	Os01g12800.1	mpv17 protein, putative, expressed	MpV17 transgene-like [Oryza sativa (japonica cultivar-group)]	TA72121_4565	n	n	n	up	up	untreated	594.064	701.205	613.629	603.008	553.137	560.597	43.6901	18.5405	23.519	13.7804	7.88121	56.3568
Ta.12582.1.S1_at	Os01g12800.1	mpv17 protein, putative, expressed	MpV17 transgene-like [Oryza sativa (japonica cultivar-group)]	TA72121_4565	n	n	n	up	up	treated	561.063	816.109	624.933	714.063	1336.9	1125.96	62.4665	79.6938	77.3266	42.3162	97.4314	48.107
Ta.12585.1.S1_at	Os04g52060.1	Transposable element protein, putative, Transposase_24, expressed	OSJNBa0085I10.7 protein [Oryza sativa (japonica cultivar-group)]	TA109620_4565	n	n	n	down	n	untreated	44.9219	71.335	51.7282	71.972	67.1117	78.8963	4.56508	7.30215	11.3456	5.58559	1.76177	11.3834
Ta.12585.1.S1_at	Os04g52060.1	Transposable element protein, putative, Transposase_24, expressed	OSJNBa0085I10.7 protein [Oryza sativa (japonica cultivar-group)]	TA109620_4565	n	n	n	down	n	treated	47.2703	51.6312	44.8485	42.2794	32.9495	58.3947	5.85839	3.19848	7.7287	0.115508	1.55378	4.70453
Ta.1259.1.S1_at	Os08g43470.1	ER lumen protein retaining receptor C28H8.4, putative, expressed	Putative ER lumen protein-retaining receptor [Oryza sativa (japonica cultivar-group)]	TA54615_4565	n	n	n	n	up	untreated	1414.47	1883.49	1682.26	1639.04	1714.57	1715.27	59.819	146.677	40.8758	46.4693	22.8406	171.753
Ta.1259.1.S1_at	Os08g43470.1	ER lumen protein retaining receptor C28H8.4, putative, expressed	Putative ER lumen protein-retaining receptor [Oryza sativa (japonica cultivar-group)]	TA54615_4565	n	n	n	n	up	treated	1355.12	1924.05	1659.86	2251.71	3179.24	3511.03	74.813	330.158	70.2949	65.2058	174.672	132.685
Ta.1259.3.S1_a_at	Os08g43470.1	ER lumen protein retaining receptor C28H8.4, putative, expressed	Putative ER lumen protein-retaining receptor [Oryza sativa (japonica cultivar-group)]	TA54750_4565	n	n	n	n	up	untreated	1049.61	1377.78	1279.28	1288.88	1284.38	1290.15	41.7081	80.4515	33.6114	46.4093	38.5475	55.769
Ta.1259.3.S1_a_at	Os08g43470.1	ER lumen protein retaining receptor C28H8.4, putative, expressed	Putative ER lumen protein-retaining receptor [Oryza sativa (japonica cultivar-group)]	TA54750_4565	n	n	n	n	up	treated	1001.99	1383.81	1249.77	1637.83	2235.74	2688.01	25.7387	184.066	106.473	58.2899	75.0554	79.0334
Ta.12590.1.S1_s_at	Os12g35890.1	sarcosine oxidase, putative, expressed	Hypothetical protein [Oryza sativa (japonica cultivar-group)]	TA84586_4565	n	n	n	up	up	untreated	577.784	459.492	350.525	475.46	540.517	720.831	65.3044	94.3883	27.2968	79.8316	88.4776	57.9639
Ta.12590.1.S1_s_at	Os12g35890.1	sarcosine oxidase, putative, expressed	Hypothetical protein [Oryza sativa (japonica cultivar-group)]	TA84586_4565	n	n	n	up	up	treated	702.375	480.163	347.495	663.607	1180.77	4272.22	113.53	121.507	61.5673	140.943	211.848	960.613
Ta.12590.1.S1_x_at	Os12g35890.1	sarcosine oxidase, putative, expressed	Hypothetical protein [Oryza sativa (japonica cultivar-group)]	TA76654_4565	n	n	up	up	n	untreated	155.487	72.1216	66.8212	187.015	502.571	843.28	71.91	19.2962	32.708	41.8227	93.6043	629.679
Ta.12590.1.S1_x_at	Os12g35890.1	sarcosine oxidase, putative, expressed	Hypothetical protein [Oryza sativa (japonica cultivar-group)]	TA76654_4565	n	n	up	up	n	treated	135.198	282.851	45.2927	710.801	2500.95	5594.19	49.7342	381.244	5.68912	30.3143	235.21	492.385
Ta.12636.1.S1_s_at	Os06g06160.4	calmodulin binding protein, putative, expressed	NA	CA644768	n	n	n	down	n	untreated	2703.43	1771.91	2118.01	1929.78	2365.78	2100.67	222.35	18.8368	117.878	260.903	277.568	558.254
Ta.12636.1.S1_s_at	Os06g06160.4	calmodulin binding protein, putative, expressed	NA	CA644768	n	n	n	down	n	treated	2618.4	1595.42	1633.54	1683.84	1181.57	1480.55	132.638	218.855	310.894	281.961	72.5568	103.279
Ta.12636.3.S1_a_at	Os06g06160.4	calmodulin binding protein, putative, expressed	Similarity to SF16 protein [Arabidopsis thaliana (Mouse-ear cress)]	TA75269_4565	n	n	n	down	n	untreated	410.27	280.381	293.53	297.552	323.876	288.941	52.5973	4.98843	26.5906	7.30621	32.5952	98.1132
Ta.12636.3.S1_a_at	Os06g06160.4	calmodulin binding protein, putative, expressed	Similarity to SF16 protein [Arabidopsis thaliana (Mouse-ear cress)]	TA75269_4565	n	n	n	down	n	treated	325.382	245.634	271.202	235.144	131.602	143.609	43.8281	51.6262	28.3587	2.68756	15.995	11.9416
Ta.12642.1.A1_at	Os04g51090.1	expressed protein	OSJNBa0083N12.5 protein [Oryza sativa (japonica cultivar-group)]	TA99099_4565	n	n	n	up	up	untreated	281.908	426.799	505.418	369.992	236.613	224.55	6.93143	28.3621	94.478	81.4698	14.7079	73.6495
Ta.12642.1.A1_at	Os04g51090.1	expressed protein	OSJNBa0083N12.5 protein [Oryza sativa (japonica cultivar-group)]	TA99099_4565	n	n	n	up	up	treated	276.55	506.886	653.682	480.13	566.853	884.388	12.3812	55.1197	16.9407	24.7851	6.2108	69.674
Ta.12652.1.S1_at	Os02g43360.1	cytochrome b5, putative, expressed	Cytochrome b5 [Ananas comosus (Pineapple)]	TA84828_4565	n	up	up	up	up	untreated	50.1656	158.891	68.6424	69.3129	54.5888	124.322	17.2652	73.4204	12.0021	13.5643	8.74807	138.887
Ta.12652.1.S1_at	Os02g43360.1	cytochrome b5, putative, expressed	Cytochrome b5 [Ananas comosus (Pineapple)]	TA84828_4565	n	up	up	up	up	treated	44.4893	497.067	326.905	1016.66	10570.5	6279.29	3.61273	467.957	87.7752	14.5838	1279.62	931.223
Ta.12652.1.S1_x_at	Os02g43360.1	cytochrome b5, putative, expressed	Cytochrome b5 [Ananas comosus (Pineapple)]	TA84828_4565	n	up	up	up	up	untreated	65.6504	165.195	87.5694	75.8652	67.5345	135.624	2.97566	65.0353	17.4864	5.10328	4.06113	123.222
Ta.12652.1.S1_x_at	Os02g43360.1	cytochrome b5, putative, expressed	Cytochrome b5 [Ananas comosus (Pineapple)]	TA84828_4565	n	up	up	up	up	treated	59.5448	456.959	305.578	894.669	10315.9	4644.69	21.9879	423.095	73.469	48.476	967.891	463.486
Ta.12652.2.S1_at	Os02g43360.1	cytochrome b5, putative, expressed	Cytochrome b5 [Ananas comosus (Pineapple)]	TA84827_4565	n	n	n	up	n	untreated	11.0912	13.326	12.1022	16.123	11.6232	11.3947	0.69497	3.02841	0.306067	1.15881	0.44273	1.29219
Ta.12652.2.S1_at	Os02g43360.1	cytochrome b5, putative, expressed	Cytochrome b5 [Ananas comosus (Pineapple)]	TA84827_4565	n	n	n	up	n	treated	12.6155	14.6454	16.899	22.8451	31.995	18.3522	1.95666	3.25122	2.53198	5.38211	6.58578	1.43916
Ta.12652.3.S1_at	Os02g43360.1	cytochrome b5, putative, expressed	Cytochrome b5 [Ananas comosus (Pineapple)]	CA604382	n	n	n	up	n	untreated	22.4867	32.0361	24.4806	27.4705	22.5239	29.1909	2.78423	1.63362	0.694813	1.25724	2.66212	1.67855
Ta.12652.3.S1_at	Os02g43360.1	cytochrome b5, putative, expressed	Cytochrome b5 [Ananas comosus (Pineapple)]	CA604382	n	n	n	up	n	treated	24.2407	30.3171	27.4554	32.2541	83.7109	38.9151	3.6284	5.93057	2.46833	5.93897	20.1491	5.25357
Ta.12652.3.S1_x_at	Os02g43360.1	cytochrome b5, putative, expressed	Cytochrome b5 [Ananas comosus (Pineapple)]	CA604382	n	n	n	up	n	untreated	32.1677	34.1212	34.4941	29.563	32.5693	37.6982	2.07758	2.92316	2.92882	2.39134	2.52289	1.98357
Ta.12652.3.S1_x_at	Os02g43360.1	cytochrome b5, putative, expressed	Cytochrome b5 [Ananas comosus (Pineapple)]	CA604382	n	n	n	up	n	treated	37.6589	39.0966	32.1808	43.3605	108.616	43.1899	2.00607	4.55967	4.48897	6.15524	17.407	7.78311
Ta.12661.1.S1_at	Os03g13800.1	NHP2-like protein 1, putative, expressed	Ribosomal protein L7Ae-like [Arabidopsis thaliana (Mouse-ear cress)]	BJ318599	n	n	n	down	n	untreated	1073.16	803.22	1546.8	3063.22	1590.52	1598.9	249.074	316.447	312.487	329.02	237.187	32.6466
Ta.12661.1.S1_at	Os03g13800.1	NHP2-like protein 1, putative, expressed	Ribosomal protein L7Ae-like [Arabidopsis thaliana (Mouse-ear cress)]	BJ318599	n	n	n	down	n	treated	1010.71	1258.74	2637.03	2957.9	594.481	1976.21	154.605	1254.11	605.848	387.134	72.1425	306.992
Ta.12665.1.S1_at	Os09g38530.1	transmembrane 9 superfamily protein member 4, putative, expressed	Putative PHG1A protein [Oryza sativa (japonica cultivar-group)]	TA68400_4565	n	n	up	up	n	untreated	2393.33	4355.76	2603.3	2861.76	2701.76	2465.46	126.745	611.176	280.185	111.394	160.426	791.575
Ta.12665.1.S1_at	Os09g38530.1	transmembrane 9 superfamily protein member 4, putative, expressed	Putative PHG1A protein [Oryza sativa (japonica cultivar-group)]	TA68400_4565	n	n	up	up	n	treated	2123.09	5530.23	4632.1	5813.59	8185.83	5729.73	77.2993	323.838	192.639	112.756	98.3684	252.326
Ta.12665.2.S1_at	Os09g38530.1	transmembrane 9 superfamily protein member 4, putative, expressed	Putative PHG1A protein [Oryza sativa (japonica cultivar-group)]	TA68400_4565	n	n	n	up	n	untreated	92.9917	157.135	120.774	128.247	99.9168	82.3596	12.7224	49.9815	6.03293	11.539	31.9898	16.1442
Ta.12665.2.S1_at	Os09g38530.1	transmembrane 9 superfamily protein member 4, putative, expressed	Putative PHG1A protein [Oryza sativa (japonica cultivar-group)]	TA68400_4565	n	n	n	up	n	treated	104.644	189.406	164.351	173.179	226.938	133.577	18.6098	39.8665	20.3656	17.0972	14.3264	28.4881
Ta.12665.3.S1_a_at	Os09g38530.1	transmembrane 9 superfamily protein member 4, putative, expressed	Putative PHG1A protein [Oryza sativa (japonica cultivar-group)]	CA683147	n	up	n	up	n	untreated	1322.96	2716.96	1324.8	1799.06	1445.44	1348.05	98.6553	278.732	114.895	449.731	154.048	460.44
Ta.12665.3.S1_a_at	Os09g38530.1	transmembrane 9 superfamily protein member 4, putative, expressed	Putative PHG1A protein [Oryza sativa (japonica cultivar-group)]	CA683147	n	up	n	up	n	treated	1194.19	3124.74	2854.02	3508.9	4474.1	3487.37	126.989	281.19	381.105	299.803	254.436	576.094
Ta.12666.1.S1_at	Os05g29930.1	late embryogenesis abundant protein, expressed	zinc-induced protein-like [Oryza sativa (japonica cultivar-group)]	TA110631_4565	n	n	n	n	down	untreated	4138.06	2858.81	379.483	264.63	3341.97	2887.03	1164.72	412.484	34.5379	82.1864	684.685	1193.61
Ta.12666.1.S1_at	Os05g29930.1	late embryogenesis abundant protein, expressed	zinc-induced protein-like [Oryza sativa (japonica cultivar-group)]	TA110631_4565	n	n	n	n	down	treated	4592.06	2172.12	748.72	363.385	1729.43	296.03	989.793	1560.71	80.3595	79.4207	135.053	116.947
Ta.12668.1.A1_at	NA	NA	Mitogen-activated protein kinase	CK196239	n	n	n	down	n	untreated	1979.47	1725.89	1942.09	1680.1	2087	1785.7	196.411	449.85	189.288	205.289	98.4657	419.547
Ta.12668.1.A1_at	NA	NA	Mitogen-activated protein kinase	CK196239	n	n	n	down	n	treated	1895.67	1780.71	1408.21	1072.98	735.552	1114.16	150.848	534.914	392.596	70.6233	66.3295	130.126
Ta.12671.1.S1_a_at	Os02g36950.2	expressed protein	Putative ORFX [Oryza sativa (japonica cultivar-group)]	CA660927	n	n	up	up	n	untreated	12918.1	14661.8	11467.9	5868.06	10778.4	11794.8	656.275	538.126	834.032	418.968	1081.88	5988.5
Ta.12671.1.S1_a_at	Os02g36950.2	expressed protein	Putative ORFX [Oryza sativa (japonica cultivar-group)]	CA660927	n	n	up	up	n	treated	12504.8	18880.5	20810.1	22356.3	26368.6	26197.1	1591.03	4189.32	2034.34	804.01	1044.97	920.844
Ta.12676.1.S1_at	Os04g27850.1	prolyl 4-hydroxylase alpha-1 subunit, putative, expressed	OSJNBb0085H11.11 protein [Oryza sativa (japonica cultivar-group)]	TA83676_4565	n	n	n	up	n	untreated	341.326	786.198	398.849	369.076	226.065	212.377	29.4157	220.093	36.446	38.0399	40.7253	96.8957
Ta.12676.1.S1_at	Os04g27850.1	prolyl 4-hydroxylase alpha-1 subunit, putative, expressed	OSJNBb0085H11.11 protein [Oryza sativa (japonica cultivar-group)]	TA83676_4565	n	n	n	up	n	treated	307.207	956.06	531.521	609.773	802.73	439.88	28.2269	262.497	94.6158	66.642	60.8868	16.9792
Ta.12687.1.S1_at	Os06g04280.1	3-phosphoshikimate 1-carboxyvinyltransferase, chloroplast precursor, putative, expressed	3-phosphoshikimate 1-carboxyvinyltransferase [Oryza sativa (Rice)]	TA61254_4565	n	n	n	up	n	untreated	1264.84	2239.96	1684.84	1367.99	1388.43	1552.61	110.307	197.016	214.251	151.766	28.1461	150.467
Ta.12687.1.S1_at	Os06g04280.1	3-phosphoshikimate 1-carboxyvinyltransferase, chloroplast precursor, putative, expressed	3-phosphoshikimate 1-carboxyvinyltransferase [Oryza sativa (Rice)]	TA61254_4565	n	n	n	up	n	treated	1419.99	2564.09	2000.2	1838.27	3051.91	1616.37	83.0858	689.951	124.497	54.1012	150.129	132.996
Ta.12690.2.S1_x_at	Os03g60380.1	dihydroflavonol-4-reductase, putative, expressed	Putative cinnamoyl-CoA reductase [Oryza sativa (japonica cultivar-group)]	CA661194	n	n	n	down	n	untreated	132.103	64.2724	184.74	175.247	193.623	200.744	6.11948	7.16418	26.4132	27.3513	16.3219	23.8183
Ta.12690.2.S1_x_at	Os03g60380.1	dihydroflavonol-4-reductase, putative, expressed	Putative cinnamoyl-CoA reductase [Oryza sativa (japonica cultivar-group)]	CA661194	n	n	n	down	n	treated	130.528	85.2066	167.109	166.057	71.21	95.0975	22.5641	59.8945	67.8447	39.002	6.34242	30.122
[truncated: 17,648 more rows]
