# Supplementary material for: Host-Selective Toxins of Pyrenophora tritici-repentis Induce Common Responses Associated with Host Susceptibility
Source: PLoS One. 2012 Jul 6;7(7):e40240. doi: 10.1371/journal.pone.0040240 (PMC3391247; doi:10.1371/journal.pone.0040240)
Supplement: Table S5 — Statistically significant differentially expressed probsets and their regulation for a selected group of genes for ToxB and ToxA microarray experiments presented in the text. (XLS) [file pone.0040240.s007.xls]

## Sheet: Sheet1
Table S5. Statistically significant differentially expressed probsets for a selected group of genes for ToxB and ToxA microarray experiments presented in the text.
Description	Regulation	# of probesets at indicated time points (hpi)
		ToxA			ToxB
		3	9	14	9	14	24	48
ATP binding protein	UP	13	19	36	6	18	53	27
	DOWN	2	14	30	0	9	28	15
Lectin-like receptor kinase	UP	7	6	6	7	10	7	4
	DOWN	0	0	1	0	0	0	0
Ser/Thr protein kinase	UP	15	12	13	6	15	23	5
	DOWN	0	1	1	0	0	2	3
Glutamate receptor	UP	1	1	2	1	2	3	2
	DOWN	2	4	4	0	4	7	3
RLK	UP	27	27	36	32	50	55	19
	DOWN	1	2	12	0	3	12	4
Calcineurin B-like protein	UP	0	3	4	0	0	0	2
	DOWN	0	0	0	0	0	0	0
Calmodulin-like protein	UP	0	10	8	3	13	19	10
	DOWN	0	0	0	0	0	0	0
Calcium-dependent protein kinase	UP	2	11	17	2	6	22	3
	DOWN	0	1	1	0	0	1	0
MAPKs	UP	0	5	10	1	3	13	3
	DOWN	0	1	0	0	2	2	0
DRE	UP	2	0	0	0	0	0	0
	DOWN	0	9	4	0	1	5	3
EREBP	UP	2	5	6	1	4	11	2
	DOWN	0	0	3	0	0	3	2
MYB transcription factor	UP	1	2	3	0	1	4	1
	DOWN	0	2	4	0	1	5	3
WRKY transcription factor	UP	7	9	8	12	15	25	3
	DOWN	0	1	1	0	0	1	1
4CCoAL	UP	5	8	8	3	6	8	3
	DOWN	0	0	0	0	0	0	0
CCoAM	UP	3	3	3	3	3	4	0
	DOWN	0	0	0	0	0	0	0
PGIP	UP	4	1	1	3	2	2	0
	DOWN	0	0	0	0	0	0	0
PG	UP	2	1	1	4	4	3	0
	DOWN	1	1	0	0	2	1	0
LOX	UP	1	10	15	3	5	8	3
	DOWN	1	0	0	0	1	7	2
PL	UP	0	3	9	0	3	10	13
	DOWN	1	3	3	0	0	5	0
Oxalate oxidase	UP	1	3	10	5	5	10	0
	DOWN	1	0	0	0	0	0	0
Reticuline oxidase	UP	1	2	2	1	1	2	5
	DOWN	0	0	0	0	0	0	0
Catalase	UP	0	0	0	0	1	2	3
	DOWN	0	0	1	0	0	3	1
Sarcosine oxidase	UP	0	0	0	0	2	4	3
	DOWN	0	0	0	0	0	0	0
Glutathione S-transferase	UP	9	14	37	9	20	36	24
	DOWN	0	1	6	0	0	12	6
RuBisCO	UP	0	1	1	1	1	2	1
	DOWN	0	5	9	0	0	20	12
Fructose 1,6-bisphosphate aldolase	UP	0	0	2	0	0	0	0
	DOWN	0	1	2	0	0	3	2
Glyceraldehyde-3-P dehydrogenase	UP	0	0	0	0	0	0	0
	DOWN	0	2	4	0	0	4	2
Transketolase	UP	0	0	0	0	0	0	0
	DOWN	0	0	0	0	0	2	0
Triosephosphate isomerase	UP	0	0	0	0	0	0	0
	DOWN	0	0	0	0	0	5	2
Citrate synthase	UP	0	3	3	0	0	3	3
	DOWN	0	0	0	0	0	0	0
Malate dehydrogenase	UP	0	5	9	2	2	2	2
	DOWN	0	0	0	0	0	2	2
Isocitrate dehydrogenase	UP	0	0	0	0	0	5	0
	DOWN	0	0	0	0	0	0	0
Pyruvate dehydrogenase	UP	0	2	3	0	2	1	0
	DOWN	0	0	4	0	0	6	6
26S proteasome subunit	UP	0	0	6	0	0	26	25
	DOWN	0	0	1	0	0	0	0
E1	UP	0	2	1	0	0	4	0
	DOWN	0	0	1	0	0	0	0
E2	UP	0	1	3	0	0	11	8
	DOWN	0	6	10	0	2	8	5
E3	UP	0	6	11	0	2	24	6
	DOWN	0	7	7	0	1	3	2
E4	UP	1	0	0	0	0	3	0
	DOWN	0	0	0	0	0	0	0
